# Supplementary material for: Distinct elongation stalls during translation are linked with distinct pathways for mRNA degradation
Source: eLife. 2022 Jul 27;11:e76038. doi: 10.7554/eLife.76038 (PMC9352352; doi:10.7554/eLife.76038)
Supplement: Supplementary file 1. [file elife-76038-supp1.xlsx]

## Sheet: Deletion_Screen_AAA
Plate	DA_quad	Strain	DAPlate	DARow	DAColumn	DA.Gene	DA.ORD	Row.1	Col.1	size_Ty.1	size_Scan.1	circ_Scan.1	GFP_Mean.1	RFP_Mean.1	GFP_Med.1	RFP_Med.1	Row.2	Col.2	size_Ty.2	size_Scan.2	circ_Scan.2	GFP_Mean.2	RFP_Mean.2	GFP_Med.2	RFP_Med.2	Row.3	Col.3	size_Ty.3	size_Scan.3	circ_Scan.3	GFP_Mean.3	RFP_Mean.3	GFP_Med.3	RFP_Med.3	Row.4	Col.4	size_Ty.4	size_Scan.4	circ_Scan.4	GFP_Mean.4	RFP_Mean.4	GFP_Med.4	RFP_Med.4	medlogRatioNorm.1	medlogRatioNorm.2	medlogRatioNorm.3	medlogRatioNorm.4	meanlogRatioNorm.1	meanlogRatioNorm.2
Plate10	66	AAA	10	3	18	CDC73	YLR418C	69	14	53	1365	0.8219	NA	4275	NA	4496	69	13	NA	NA	NA	NA	NA	NA	NA	70	14	53	1142	0.737	NA	2457	NA	2538	70	13	95	2058	0.8656	4548	4246	4732	4488	NA	NA	NA	-1.09471	NA	NA
Plate02	94	AAA	2	4	22	PAT1	YCR077C	7	54	73	1743	0.7923	16623	15445	17549	16008	7	53	116	2756	0.8376	17999	16002	18208	16084	8	54	112	2602	0.8426	17254	15342	18046	15580	8	53	124	2774	0.8579	16982	14659	16904	14330	-0.741092	-0.689126	-0.661592	-0.655278	-0.75407	-0.677284
Plate14	95	AAA	14	4	23	SLH1	YGR271W	71	100	158	3808	0.8475	15189	13305	14888	13654	71	99	167	3884	0.8748	14514	12451	14301	12860	72	100	138	3652	0.8547	16545	14764	16517	14728	72	99	159	3830	0.8566	15514	13394	15404	13613	-0.904505	-0.886696	-0.843285	-0.847616	-0.804947	-0.784224
Plate09	165	AAA	9	7	21	SRN2	YLR119W	13	104	71	1216	0.6324	NA	7529	NA	7489	13	103	86	1778	0.8026	20100	9699	20190	9814	14	104	91	1928	0.7262	20369	9890	20732	9938	14	103	100	2120	0.7209	20966	10162	21518	10392	NA	-0.408319	-0.384055	-0.386297	NA	-0.377684
Plate11	195	AAA	11	9	3	SWS2	YNL081C	49	44	105	2112	0.8657	22749	11350	22928	11512	49	43	99	2027	0.8388	22508	11208	22587	11278	50	44	94	1875	0.8346	21430	10478	21434	10745	50	43	87	1738	0.8193	21144	10359	21447	10446	-0.35268	-0.342003	-0.341021	-0.297802	-0.336577	-0.33208
Plate09	196	AAA	9	9	4	COX12	YLR038C	17	138	134	2684	0.7396	31705	15686	32815	15977	17	137	141	2797	0.7606	31699	15710	32885	16096	18	138	147	2899	0.8014	31880	15862	32902	15886	18	137	152	2928	0.7975	31710	15927	32943	16052	-0.328526	-0.335602	-0.316645	-0.329167	-0.336434	-0.338839
Plate07	82	AAA	7	4	10	LSM1	YJL124C	39	126	140	3652	0.8451	31870	26076	34326	27215	39	125	144	3745	0.9029	32552	26811	34904	27411	40	126	144	3631	0.8097	31991	26397	34757	27765	40	125	147	3864	0.7784	32980	27056	34733	27138	-0.418033	-0.398885	-0.421533	-0.394912	-0.488616	-0.488477
Plate08	225	AAA	8	10	9	COX17	YLL009C	19	80	147	2825	0.7255	28653	16142	29887	16432	19	79	155	3082	0.7597	29244	16782	30601	17179	20	80	139	2733	0.7765	28738	16205	30129	16486	20	79	146	2868	0.754	28841	16228	29990	16842	-0.34617	-0.360901	-0.336732	-0.370466	-0.363531	-0.376492
Plate01	268	AAA	1	12	4	SIF2	YBR103W	23	42	150	3507	0.8676	14229	10404	14316	10717	23	41	143	3486	0.8598	14001	10359	14118	10725	24	42	143	3526	0.8787	14818	10807	14995	11230	24	41	145	3492	0.8426	14272	10388	14442	10584	-0.529737	-0.552091	-0.52195	-0.499413	-0.498423	-0.517018
Plate10	51	AAA	10	3	3	MFT1	YML062C	69	44	66	1732	0.8291	5062	3724	5031	3735	69	43	67	1712	0.828	5383	3924	5432	4107	70	44	71	1808	0.7975	5806	4371	5824	4496	70	43	85	2221	0.8983	6903	4773	6934	5047	-0.753062	-0.762852	-0.777179	-0.663787	-0.714663	-0.692763
Plate02	305	AAA	2	13	17	RIM1	YCR028C-A	25	64	62	1562	0.8193	19510	16552	20475	16880	25	63	78	2231	0.8637	21140	17956	21100	18372	26	64	70	1824	0.714	18808	15719	18662	16473	26	63	66	1792	0.736	17978	14758	18292	14918	-0.566978	-0.629939	-0.681462	-0.583426	-0.596546	-0.579303
Plate03	287	AAA	3	12	23	RVS167	YDR388W	23	100	85	2247	0.8633	25161	22322	25086	22181	23	99	76	2146	0.589	29012	23560	28958	24264	24	100	66	2078	0.7596	28773	24115	28564	24991	24	99	92	2267	0.8608	28279	23661	28329	24048	-0.869445	-0.696861	-0.752608	-0.728486	-0.825541	-0.621575
Plate13	93	AAA	13	4	21	COX10	YPL172C	71	56	78	1976	0.8565	20275	16070	20168	16496	71	55	66	1715	0.8748	19415	15442	20211	15643	72	56	79	1983	0.8801	20810	16159	20671	16560	72	55	78	2109	0.8597	22129	18073	22997	18518	-0.660411	-0.584973	-0.628095	-0.617545	-0.611153	-0.623121
Plate09	85	AAA	9	4	13	YLR338W	YLR338W	7	120	71	1341	0.7196	NA	9200	NA	9240	7	119	76	1603	0.8556	21371	9627	21671	9837	8	120	60	970	0.6389	NA	6721	NA	6861	8	119	75	1560	0.7712	20924	9941	21398	10039	NA	-0.301834	NA	-0.348652	NA	-0.272824
Plate06	163	AAA	6	7	19	RMD11	YHL023C	45	60	117	3013	0.8231	28906	23029	29591	23144	45	59	106	2736	0.7955	28262	21211	29353	22107	46	60	119	2937	0.8622	25892	20864	27534	22447	46	59	112	2886	0.816	26737	21268	28052	22621	-0.488509	-0.437888	-0.55567	-0.538046	-0.499794	-0.419731
Plate06	172	AAA	6	8	4	COX23	YHR116W	47	90	77	2217	0.8402	22020	16952	23045	17629	47	89	78	2237	0.8385	21405	16421	21947	16836	48	90	81	2311	0.8101	21758	16820	22442	17249	48	89	72	2054	0.8004	22581	17513	22348	17769	-0.492484	-0.502556	-0.502401	-0.549674	-0.483369	-0.481619
Plate04	37	AAA	4	2	13	UBP3	YER151C	35	24	137	3007	0.7901	8291	6060	8570	5968	35	23	127	2743	0.8072	8460	6340	8946	6263	36	24	116	2587	0.8957	7790	5418	8339	5435	36	23	116	2482	0.8302	7732	5767	8424	5931	-0.486704	-0.491688	-0.395012	-0.50324	-0.530062	-0.56474
Plate14	232	AAA	14	10	16	UBC4	YBR082C	83	114	110	2843	0.8699	12931	9841	13265	10300	83	113	96	2398	0.8885	13057	9165	13880	9578	84	114	101	2545	0.8682	12810	9624	13052	10079	84	113	114	2774	0.8237	12563	9486	13038	9893	-0.705813	-0.538417	-0.7018	-0.678517	-0.639328	-0.527391
Plate08	158	AAA	8	7	14	ECM17	YJR137C	13	70	105	1851	0.6344	13579	6223	13404	6345	13	69	102	2193	0.7086	10678	4467	9713	3911	14	70	103	1804	0.7551	14149	6378	14103	6526	14	69	107	1815	0.6376	12562	5547	12633	5575	-0.390403	-0.303094	-0.346538	-0.317487	-0.340206	-0.306116
Plate01	226	AAA	1	10	10	UBC4	YBR082C	19	30	116	2887	0.8333	9795	6701	9925	6975	19	29	117	3006	0.9019	10253	6690	10423	6933	20	30	125	3198	0.8262	10433	7027	10662	7300	20	29	111	2913	0.8408	10653	7288	10775	7524	-0.508854	-0.425678	-0.460795	-0.485588	-0.460066	-0.388678
Plate04	33	AAA	4	2	9	PET122	YER153C	35	32	87	2277	0.7921	18635	13807	19349	14267	35	31	86	2281	0.8087	19846	14591	20700	15357	36	32	67	2004	0.7194	19127	13963	19623	13869	36	31	86	2263	0.6735	19082	13873	20010	14413	-0.526493	-0.530947	-0.465808	-0.491399	-0.527921	-0.515189
Plate04	36	AAA	4	2	12	HOM3	YER052C	35	26	NA	NA	NA	NA	NA	NA	NA	35	25	NA	NA	NA	NA	NA	NA	NA	36	26	97	NA	NA	1365	677	1046	438	36	25	66	NA	NA	1485	806	1110	594	NA	NA	-0.468851	-0.706416	NA	NA
Plate14	28	AAA	14	2	4	YGL042C	YGL042C	67	138	109	2541	0.8963	16958	12107	17806	12331	67	137	103	2466	0.8653	16321	12257	17098	13060	68	138	111	2607	0.8501	15704	11971	16519	12525	68	137	112	2630	0.8873	15528	11906	16496	12540	-0.490696	-0.630154	-0.628095	-0.631853	-0.508495	-0.583762
Plate01	124	AAA	1	6	4	MUM2	YBR057C	11	42	133	3016	0.8265	10062	6511	10467	6602	11	41	120	2760	0.8564	9662	6303	10150	6627	12	42	120	2645	0.8256	10132	6870	10649	7255	12	41	129	2819	0.8697	10001	6674	10675	6923	-0.353014	-0.405251	-0.45429	-0.387133	-0.379901	-0.396747
Plate08	327	AAA	8	14	15	UBI4	YLL039C	27	68	101	2083	0.8514	21169	10394	21690	10702	27	67	107	2388	0.7714	20904	9837	21337	9935	28	68	76	1502	0.6332	17494	8682	18030	8960	28	67	107	2317	0.8051	22815	10949	23606	11132	-0.320498	-0.248807	-0.377176	-0.238301	-0.303657	-0.252554
Plate08	132	AAA	8	6	12	DOA1	YKL213C	11	74	176	3855	0.7885	19202	9124	19506	9300	11	73	160	3376	0.7993	17927	8561	18287	8617	12	74	166	3779	0.7602	19754	9331	19829	9437	12	73	170	3778	0.7918	19855	9274	19914	9325	-0.302889	-0.303538	-0.296371	-0.273945	-0.289788	-0.315614
Plate12	177	AAA	12	8	9	RUP1	YOR138C	47	80	110	2231	0.7863	15444	7060	15876	7181	47	79	117	2384	0.8015	15487	7229	15645	7284	48	80	80	1511	0.7323	12651	6048	12405	6295	48	79	106	2241	0.8378	15340	6961	15618	7104	-0.230088	-0.271808	-0.428499	-0.240078	-0.242899	-0.271131
Plate04	171	AAA	4	8	3	BUD27	YFL023W	47	44	59	1394	0.8601	NA	2675	NA	2801	47	43	54	1336	0.8884	NA	2783	NA	2815	48	44	61	1606	0.8732	4361	2878	4476	2943	48	43	69	1708	0.9007	4541	3068	4537	3165	NA	NA	-0.474335	-0.55309	NA	NA
Plate07	308	AAA	7	13	20	MLP2	YIL149C	57	106	148	3590	0.8207	22485	15304	23636	15344	57	105	166	4043	0.8485	23987	16668	25210	17002	58	106	147	3627	0.8193	23083	15437	24051	15547	58	105	151	3783	0.8503	23928	16158	24893	16132	-0.33575	-0.355585	-0.323199	-0.311838	-0.389922	-0.392453
Plate12	131	AAA	12	6	11	LEO1	YOR123C	43	76	85	492	0.4101	NA	1970	NA	1915	43	75	5	NA	NA	NA	NA	NA	NA	44	76	86	1680	0.742	12572	5689	12702	5759	44	75	168	197	0.4211	NA	961	NA	748	NA	NA	-0.272966	NA	NA	NA
Plate03	128	AAA	3	6	8	HTA1	YDR225W	11	130	63	1739	0.8534	23800	15653	25113	16502	11	129	70	1753	0.8106	23048	15296	24810	15770	12	130	83	2164	0.9015	25247	16765	26116	17857	12	129	66	1744	0.8842	24317	16135	25175	16453	-0.554929	-0.528403	-0.56755	-0.547272	-0.543273	-0.575373
Plate13	165	AAA	13	7	21	MNE1	YOR350C	77	56	78	2138	0.86	24542	18533	25711	18909	77	55	74	1941	0.8736	21948	18406	22078	18976	78	56	117	2932	0.8747	23615	15111	24156	14528	78	55	87	2368	0.8631	26261	19638	26950	20376	-0.476059	-0.71296	-0.212395	-0.506293	-0.513646	-0.674677
Plate14	247	AAA	14	11	7	QCR2	YPR191W	85	132	79	2274	0.8501	34237	28526	35052	29485	85	131	81	2177	0.825	35130	29278	36184	29480	86	132	89	2289	0.8781	37300	32935	38411	34018	86	131	100	2670	0.8544	37420	33753	38614	34737	-0.468028	-0.412494	-0.469616	-0.483694	-0.492599	-0.480813
Plate08	114	AAA	8	5	18	NA	YJR120W	9	62	112	2330	0.7142	24954	12351	25818	12753	9	61	109	2220	0.7413	24677	12160	25479	12581	10	62	112	2329	0.8023	24874	12295	25859	12706	10	61	89	1745	0.7027	22701	11206	23251	11556	-0.270673	-0.27456	-0.263406	-0.310921	-0.26038	-0.258728
Plate12	68	AAA	12	3	20	NA	YNR020C	37	58	90	1576	0.8597	16734	7804	16381	7971	37	57	58	924	0.7308	NA	6352	NA	6518	38	58	81	1525	0.8078	16624	7697	16721	8058	38	57	80	1398	0.5483	NA	7303	NA	7482	-0.325946	NA	-0.309497	NA	-0.258787	NA
Plate06	346	AAA	6	15	10	YTA7	YGR270W	61	78	62	1797	0.891	20640	14470	21553	15026	61	77	61	1624	0.863	18606	13565	18304	13680	62	78	75	2011	0.8802	21690	15512	22513	16042	62	77	57	1546	0.8368	19554	13957	19133	14535	-0.372792	-0.489211	-0.397552	-0.50621	-0.360492	-0.426312
Plate03	237	AAA	3	10	21	BCS1	YDR375C	19	104	107	2572	0.7838	40109	38742	41593	39428	19	103	116	2649	0.8651	39773	39170	41135	40389	20	104	116	2660	0.7635	39101	36901	41070	39077	20	103	117	2658	0.8086	40363	38172	41360	40001	-0.488769	-0.533059	-0.504763	-0.513338	-0.514706	-0.541479
Plate04	201	AAA	4	9	9	NPR2	YEL062W	49	32	108	3115	0.845	21600	15301	22055	15591	49	31	105	2882	0.8891	19307	13472	19751	13770	50	32	100	2836	0.8904	19569	13287	19706	13143	50	31	105	2893	0.8701	19131	13005	19513	13247	-0.458695	-0.446113	-0.383579	-0.409205	-0.459641	-0.441237
Plate02	34	AAA	2	2	10	IMG2	YCR071C	3	78	79	1854	0.7034	31630	25783	33652	26821	3	77	58	1425	0.7816	NA	22906	NA	23821	4	78	49	1197	0.8048	NA	19085	NA	19181	4	77	55	1439	0.7468	NA	22024	NA	22153	-0.376076	NA	NA	NA	-0.423125	NA
Plate12	39	AAA	12	2	15	VPS21	YOR089C	35	68	84	1461	0.7229	NA	6106	NA	6065	35	67	86	1549	0.6741	13909	6410	13818	6419	36	68	89	1872	0.7601	15835	7279	15393	7259	36	67	88	1828	0.7741	16084	7310	16313	7294	NA	-0.288607	-0.29165	-0.21052	NA	-0.271007
Plate08	83	AAA	8	4	11	MET1	YKR069W	7	76	134	2274	0.6305	14695	6626	14715	6872	7	75	130	2248	0.7279	14310	6466	14375	6742	8	76	133	2143	0.5807	13844	6247	13805	6460	8	75	129	2521	0.6679	17706	7224	17123	7207	-0.346995	-0.358881	-0.367072	-0.171177	-0.296077	-0.306466
Plate08	138	AAA	8	6	18	CBT1	YKL208W	11	62	105	2165	0.7186	26297	12769	27010	12898	11	61	119	2483	0.7055	27305	13764	28040	13986	12	62	125	2566	0.7612	27291	14008	28657	14072	12	61	135	2720	0.8194	28448	15074	29582	15360	-0.212342	-0.253206	-0.225114	-0.28072	-0.217096	-0.248729
Plate13	34	AAA	13	2	10	LGE1	YPL055C	67	78	74	1586	0.853	5315	3074	5598	3156	67	77	63	1323	0.7724	NA	2850	NA	2960	68	78	68	1470	0.82	NA	2977	NA	3201	68	77	68	1609	0.8737	5237	3018	5569	3116	-0.440483	NA	NA	-0.432188	-0.461254	NA
Plate03	284	AAA	3	12	20	HEL2	YDR266C	23	106	184	4615	0.8588	27934	19752	28116	19891	23	105	191	4806	0.8498	28717	20335	29065	21198	24	106	183	4643	0.8987	27420	19314	27529	19895	24	105	180	4577	0.89	28149	19519	28670	19951	-0.545713	-0.550698	-0.584748	-0.512916	-0.504994	-0.485426
Plate06	183	AAA	6	8	15	TIR3	YIL011W	47	68	NA	NA	NA	NA	NA	NA	NA	47	67	NA	NA	NA	NA	NA	NA	NA	48	68	101	NA	NA	1183	426	1097	268	48	67	NA	NA	NA	NA	NA	NA	NA	NA	NA	-0.10526	NA	NA	NA
Plate07	167	AAA	7	7	23	LYS1	YIR034C	45	100	114	2627	0.8091	37229	26204	39583	26863	45	99	84	NA	NA	1577	632	1507	422	46	100	102	2471	0.8286	32807	19055	34344	19651	46	99	134	3051	0.8045	38366	28820	40206	29568	-0.164228	-0.412561	-0.020221	-0.254555	-0.239582	-0.711112
Plate08	219	AAA	8	10	3	PUF3	YLL013C	19	92	210	4607	0.8374	27370	13642	27855	13688	19	91	206	4307	0.7794	26663	13463	27070	13541	20	92	205	4532	0.8078	27828	14058	28179	14052	20	91	198	4318	0.7214	27393	13728	27744	13688	-0.237142	-0.270206	-0.250963	-0.243665	-0.233805	-0.260519
Plate02	297	AAA	2	13	9	SNT1	YCR033W	25	80	122	2946	0.8362	14061	9774	14603	10573	25	79	123	2949	0.8748	13724	9462	14452	9995	26	80	126	3094	0.8665	14343	9917	15016	10471	26	79	123	2940	0.8353	13524	9268	14084	9582	-0.487763	-0.430588	-0.431112	-0.416141	-0.406148	-0.400865
Plate10	252	AAA	10	11	12	NA	YML013C-A	85	26	52	1278	0.7152	NA	3277	NA	3371	85	25	41	936	0.7949	NA	2746	NA	2816	86	26	54	1544	0.8985	7473	4749	7784	4931	86	25	32	647	0.7377	NA	1882	NA	1971	NA	NA	-0.454334	NA	NA	NA
Plate07	339	AAA	7	15	3	ARG3	YJL088W	61	140	NA	NA	NA	NA	NA	NA	NA	61	139	NA	NA	NA	NA	NA	NA	NA	62	140	109	NA	NA	988	230	929	172	62	139	NA	NA	NA	NA	NA	NA	NA	NA	NA	-0.16038	NA	NA	NA
Plate09	94	AAA	9	4	22	NA	YLR218C	7	102	102	2093	0.8231	26845	11844	27393	11925	7	101	118	2515	0.7836	28554	12964	29866	13468	8	102	105	2194	0.8129	27023	12034	27988	12219	8	101	113	2510	0.7946	28671	13032	30059	13338	-0.200991	-0.235588	-0.20138	-0.212543	-0.202053	-0.231678
Plate13	62	AAA	13	3	14	STE4	YOR212W	69	70	NA	NA	NA	NA	NA	NA	NA	69	69	NA	NA	NA	NA	NA	NA	NA	70	70	115	NA	NA	855	211	839	187	70	69	74	NA	NA	874	247	840	203	NA	NA	-0.338899	-0.421279	NA	NA
Plate13	280	AAA	13	12	16	SPO19	YPL130W	87	66	64	1786	0.9043	10745	6573	10658	6566	87	65	67	1526	0.8951	9553	6116	10449	6457	88	66	59	1265	0.8791	NA	3710	NA	3955	88	65	NA	NA	NA	NA	NA	NA	NA	-0.395949	-0.404348	NA	NA	-0.374163	-0.459305
Plate14	225	AAA	14	10	9	CAT5	YOR125C	83	128	53	1451	0.8539	NA	21934	NA	21079	83	127	59	1656	0.8678	32373	25259	32961	24311	84	128	48	1247	0.7942	NA	17875	NA	17322	84	127	50	1434	0.8717	NA	22372	NA	23140	NA	-0.349818	NA	NA	NA	-0.43774
Plate12	201	AAA	12	9	9	HMI1	YOL095C	49	80	105	2442	0.7927	23864	11699	24557	11744	49	79	94	NA	NA	4921	1261	4750	1188	50	80	100	2156	0.7742	22375	10903	23464	10993	50	79	115	2447	0.8033	23595	11631	24086	11524	-0.190369	-0.164144	-0.183718	-0.199112	-0.241177	-0.132803
Plate01	70	AAA	1	3	22	VPS8	YAL002W	5	6	98	2854	0.8592	18954	12332	18398	12543	5	5	70	1923	0.8559	14878	9550	15093	9826	6	6	98	2883	0.8532	18286	11721	18359	11932	6	5	59	1524	0.7774	13061	8444	12867	8242	-0.357406	-0.331311	-0.293279	-0.337591	-0.293653	-0.313602
Plate06	28	AAA	6	2	4	GIC1	YHR061C	35	90	161	4503	0.8526	19711	13008	20627	13081	35	89	60	1332	0.87	NA	3243	NA	3403	36	90	60	1576	0.8624	10947	7365	10713	7447	36	89	33	737	0.7918	NA	3468	NA	3703	-0.247575	NA	-0.462457	NA	-0.28171	NA
Plate03	235	AAA	3	10	19	LSM6	YDR378C	19	108	174	4047	0.8453	44008	43326	46510	44612	19	107	176	4011	0.8492	42713	40588	44920	41300	20	108	180	4166	0.8018	43215	40512	45268	40932	20	107	170	3885	0.8131	43523	42939	45796	44175	-0.38746	-0.383188	-0.359763	-0.408517	-0.444069	-0.439024
Plate09	275	AAA	9	12	11	ATP10	YLR393W	23	124	123	2508	0.8404	29683	13328	31076	13668	23	123	119	2457	0.7283	29248	13139	30509	13532	24	124	127	2530	0.8823	29469	13236	31128	13645	24	123	103	1967	0.7321	27583	12133	29301	12575	-0.195609	-0.209791	-0.190768	-0.170802	-0.21092	-0.213669
Plate11	78	AAA	11	4	6	NA	YNL165W	39	38	170	4007	0.8479	17885	8127	18022	8306	39	37	173	4051	0.8258	17298	8077	17506	8226	40	38	183	4209	0.8027	18432	8322	18754	8461	40	37	196	4459	0.8395	18274	8201	18479	8383	-0.204407	-0.232098	-0.174398	-0.181983	-0.1786	-0.217731
Plate08	341	AAA	8	15	5	MRP49	YKL167C	29	88	196	3944	0.7156	30781	15860	31911	16552	29	87	194	3841	0.7539	30509	15628	31655	16320	30	88	188	3774	0.817	30962	15967	31948	16616	30	87	180	3622	0.7728	30729	15600	31669	16183	-0.245707	-0.241999	-0.24846	-0.231007	-0.222297	-0.219305
Plate12	166	AAA	12	7	22	BRE5	YNR051C	45	54	136	2682	0.7153	13924	6150	14350	6356	45	53	152	2985	0.7931	14499	6355	14965	6587	46	54	149	2944	0.7342	13939	6130	14343	6270	46	53	142	2785	0.8384	13968	6088	14480	6309	-0.217364	-0.201717	-0.199675	-0.193504	-0.213463	-0.195694
Plate08	220	AAA	8	10	4	RQT4	YKR023W	19	90	164	3407	0.8067	22824	10670	23185	10656	19	89	163	3461	0.759	22531	10418	22832	10475	20	90	173	3773	0.7914	23527	10956	23837	11020	20	89	170	3561	0.8487	22744	10580	23274	10658	-0.20981	-0.211612	-0.209716	-0.203997	-0.217364	-0.207254
Plate06	39	AAA	6	2	15	THP2	YHR167W	35	68	111	2577	0.8401	15738	9986	16955	10067	35	67	97	2308	0.7922	16319	10821	16961	11001	36	68	123	2935	0.832	17713	12194	18391	11714	36	67	121	2945	0.8646	17185	11584	18014	11739	-0.181535	-0.303322	-0.267996	-0.302122	-0.253104	-0.309808
Plate02	208	AAA	2	9	16	UBX7	YBR273C	17	66	175	4234	0.8522	20104	13468	20762	13811	17	65	178	4216	0.8302	19784	13355	20725	13637	18	66	165	3953	0.8985	18677	13433	19200	13637	18	65	161	3754	0.8643	18100	13037	19066	13456	-0.282799	-0.269029	-0.389547	-0.383113	-0.276115	-0.289896
Plate08	233	AAA	8	10	17	RTT109	YLL002W	19	64	140	3056	0.8063	27032	13049	28254	13468	19	63	132	2846	0.8617	25761	12420	26736	12774	20	64	120	2691	0.7391	25760	12301	26555	12621	20	63	131	2974	0.7288	26284	12624	27017	13011	-0.193626	-0.216532	-0.212112	-0.22298	-0.199108	-0.215741
Plate06	32	AAA	6	2	8	CPR2	YHR057C	35	82	100	NA	NA	1173	395	1115	309	35	81	NA	NA	NA	NA	NA	NA	NA	36	82	NA	NA	NA	NA	NA	NA	NA	36	81	NA	NA	NA	NA	NA	NA	NA	-0.232031	NA	NA	NA	-0.300454	NA
Plate02	228	AAA	2	10	12	SLM3	YDL033C	19	74	139	3370	0.8479	33417	25813	35348	26363	19	73	151	3565	0.8284	32923	25336	35008	25863	20	74	140	3428	0.8289	34270	26734	36260	27902	20	73	126	3121	0.8867	32190	24020	34188	24856	-0.275083	-0.266101	-0.306685	-0.253272	-0.33778	-0.336988
Plate02	285	AAA	2	12	21	DHH1	YDL160C	23	56	NA	NA	NA	NA	NA	NA	NA	23	55	NA	NA	NA	NA	NA	NA	NA	24	56	135	NA	NA	1320	348	1285	319	24	55	87	NA	NA	1342	491	1259	384	NA	NA	-0.220678	-0.466985	NA	NA
Plate03	77	AAA	3	4	5	SWR1	YDR334W	7	136	70	1835	0.851	17541	8119	18353	8180	7	135	88	2180	0.8309	16105	7585	17044	7702	8	136	72	1717	0.855	14691	6746	15787	7110	8	135	93	2279	0.8575	15837	7441	16970	7594	-0.336231	-0.395648	-0.435386	-0.386898	-0.336211	-0.403007
Plate07	126	AAA	7	6	6	YAK1	YJL141C	43	134	138	3256	0.8349	13417	7212	14064	7430	43	133	144	3416	0.8451	13664	7334	14409	7667	44	134	133	3121	0.852	13344	7075	13958	7352	44	133	141	3260	0.8803	13234	7146	13943	7440	-0.289118	-0.288549	-0.288355	-0.304953	-0.269098	-0.261086
Plate12	95	AAA	12	4	23	KTR1	YOR099W	39	52	84	1490	0.7475	NA	5627	NA	5720	39	51	72	1201	0.3913	NA	4717	NA	4603	40	52	91	1757	0.6337	14205	6220	14336	6303	40	51	123	2583	0.6487	16638	7351	16949	7531	NA	NA	-0.207525	-0.196544	NA	NA
Plate14	139	AAA	14	6	19	LYS12	YIL094C	75	108	102	84	0.498	NA	505	NA	378	75	107	88	2500	0.8719	24449	13671	24229	14135	76	108	122	NA	NA	1365	574	1271	392	76	107	84	NA	NA	1020	439	978	270	NA	-0.184814	-0.242835	-0.259266	NA	-0.105342
Plate12	260	AAA	12	11	20	SIN3	YOL004W	53	58	68	1124	0.7033	NA	5000	NA	5417	53	57	100	1954	0.7679	15181	6663	15484	6847	54	58	66	1109	0.5426	NA	5050	NA	5040	54	57	65	1103	0.5556	NA	5200	NA	5217	NA	-0.202678	NA	NA	NA	-0.189871
Plate03	185	AAA	3	8	17	NA	YDR360W	15	112	142	3435	0.8448	45391	42935	47044	46256	15	111	142	3332	0.8286	44386	41227	45229	44067	16	112	155	3738	0.8712	45754	43137	46469	45989	16	111	140	3286	0.8913	43537	40984	44504	43574	-0.398735	-0.430555	-0.41744	-0.451561	-0.375666	-0.380064
Plate13	333	AAA	13	14	21	NA	YPL247C	91	56	NA	NA	NA	NA	NA	NA	NA	91	55	NA	NA	NA	NA	NA	NA	NA	92	56	108	NA	NA	1043	295	1022	253	92	55	NA	NA	NA	NA	NA	NA	NA	NA	NA	-0.292551	NA	NA	NA
Plate10	79	AAA	10	4	7	MLH1	YMR167W	71	36	75	1883	0.7996	6109	4090	6309	4105	71	35	74	1821	0.8278	5978	3179	6278	3283	72	36	97	2556	0.8773	7042	3690	7406	3720	72	35	71	1651	0.8937	5543	3323	5490	3409	-0.531595	-0.238704	-0.152161	-0.495719	-0.557157	-0.245824
Plate08	218	AAA	8	10	2	DBP7	YKR024C	19	94	147	2976	0.7401	23861	10947	24525	11067	19	93	143	2907	0.7316	22890	10492	23681	10684	20	94	159	3145	0.7523	23733	10964	24618	11166	20	93	125	2463	0.7797	22473	10331	23241	10520	-0.170112	-0.179749	-0.175652	-0.189225	-0.179064	-0.191124
Plate11	263	AAA	11	11	23	PMS1	YNL082W	53	4	144	3025	0.7236	11985	5498	12141	5551	53	3	133	2760	0.7824	12150	5198	12480	5255	54	4	154	3205	0.7375	12630	5326	12912	5416	54	3	131	2674	0.7443	12199	5289	12617	5390	-0.230227	-0.114535	-0.101893	-0.131287	-0.232365	-0.136667
Plate12	91	AAA	12	4	19	RAS1	YOR101W	39	60	143	3023	0.8168	18432	8093	18704	8229	39	59	111	2224	0.7908	15953	7212	15997	7341	40	60	148	3438	0.8169	20153	9104	20447	9205	40	59	150	3363	0.8025	20473	9159	20641	9297	-0.166469	-0.248903	-0.177414	-0.175624	-0.161083	-0.223056
Plate11	58	AAA	11	3	10	HOR7	YMR251W-A	37	30	136	2839	0.7649	16828	7261	17494	7413	37	29	136	2864	0.7741	16781	7484	17348	7677	38	30	128	2598	0.6846	16273	7388	16616	7504	38	29	142	3120	0.7533	17514	8026	17776	8140	-0.0832261	-0.145595	-0.175581	-0.194876	-0.104958	-0.152212
Plate07	162	AAA	7	7	18	FMC1	YIL098C	45	110	52	1396	0.8514	NA	17931	NA	18737	45	109	57	1349	0.8634	NA	17053	NA	18508	46	110	63	1610	0.8629	28465	18590	29742	20141	46	109	52	1321	0.8806	NA	18644	NA	19989	NA	NA	-0.289511	NA	NA	NA
Plate04	199	AAA	4	9	7	CAN1	YEL063C	49	36	62	1580	0.8552	9382	6405	9427	6715	49	35	49	1182	0.8287	NA	5209	NA	5498	50	36	95	2908	0.8013	15072	9575	15248	10085	50	35	68	2016	0.7698	11731	6732	11973	6766	-0.513372	NA	-0.385174	-0.173395	-0.428138	NA
Plate14	82	AAA	14	4	10	CYT2	YKL087C	71	126	127	3132	0.8457	36560	28180	38989	29392	71	125	104	2716	0.867	36383	27227	38015	28992	72	126	100	2572	0.8485	36238	28313	37366	31086	72	125	120	2988	0.8893	36018	26562	39010	27682	-0.278643	-0.307321	-0.416645	-0.209519	-0.367707	-0.334338
Plate11	99	AAA	11	5	3	COX5A	YNL052W	41	44	161	3672	0.7582	25593	11203	26477	11433	41	43	170	3805	0.851	25399	11151	26103	11404	42	44	165	3568	0.8268	25126	10957	26024	11178	42	43	167	3604	0.8564	25050	10959	25740	11212	-0.146922	-0.162206	-0.135595	-0.155098	-0.15636	-0.15955
Plate01	235	AAA	1	10	19	MBA1	YBR185C	19	12	156	3689	0.8615	19590	12513	20190	13145	19	11	161	3945	0.8208	19397	12251	19953	12752	20	12	169	3973	0.8593	19676	12428	20329	12714	20	11	154	3733	0.8656	19696	12410	20222	12835	-0.277696	-0.25497	-0.222235	-0.243113	-0.263022	-0.24942
Plate04	95	AAA	4	4	23	SPT2	YER161C	39	4	129	3110	0.8398	27648	17874	28579	17866	39	3	130	3014	0.7534	26120	16615	26785	17167	40	4	132	3196	0.8244	26155	17173	26654	16946	40	3	142	3559	0.8016	29877	18291	30349	18460	-0.26725	-0.307048	-0.296079	-0.224314	-0.321491	-0.300167
Plate12	140	AAA	12	6	20	ROD1	YOR018W	43	58	88	1345	0.5648	NA	4780	NA	4660	43	57	84	1645	0.5727	13168	5635	13125	5784	44	58	92	1655	0.6419	12693	5445	12125	5413	44	57	105	2015	0.732	14350	6100	14289	6182	NA	-0.227932	-0.263227	-0.186351	NA	-0.182458
Plate04	317	AAA	4	14	5	UBP6	YFR010W	59	40	81	2055	0.8527	6286	3936	6452	4090	59	39	90	2226	0.8475	6903	4312	7145	4419	60	40	71	1785	0.8824	6205	3722	6389	3862	60	39	83	2047	0.8924	6518	3922	6740	4009	-0.377296	-0.333305	-0.312142	-0.284261	-0.331451	-0.319731
Plate13	273	AAA	13	12	9	HSP82	YPL240C	87	80	79	1944	0.8265	13397	8943	13657	9191	87	79	110	2834	0.8483	16646	9568	17170	9836	88	80	80	2147	0.8684	19278	9593	19578	9471	88	79	117	2998	0.8518	12088	9360	12119	9448	-0.464279	-0.204464	0.0477535	-0.685287	-0.449491	-0.20816
Plate14	237	AAA	14	10	21	LSM7	YNL147W	83	104	149	3730	0.833	37129	27771	39216	28677	83	103	151	3774	0.8151	37266	29251	39743	29454	84	104	146	3493	0.8673	32924	23528	34405	24192	84	103	154	3818	0.8739	37761	29092	39023	29402	-0.240527	-0.247463	-0.270753	-0.277503	-0.324138	-0.380371
Plate07	134	AAA	7	6	14	RPS21B	YJL136C	43	118	95	2430	0.889	20628	12247	22191	12685	43	117	94	2311	0.7912	20491	12066	21789	12372	44	118	60	1447	0.826	NA	10291	NA	11077	44	117	74	1977	0.8774	19942	11577	20897	11838	-0.204767	-0.203985	NA	-0.2182	-0.248059	-0.239997
Plate10	46	AAA	10	2	22	NA	YMR031W-A	67	6	NA	NA	NA	NA	NA	NA	NA	67	5	86	NA	NA	657	285	636	219	68	6	131	NA	NA	640	208	619	181	68	5	125	2908	0.7798	7006	3785	7281	3945	NA	-0.373503	-0.211251	-0.257339	NA	-0.532259
Plate13	81	AAA	13	4	9	TCO89	YPL180W	71	80	77	2121	0.8811	24420	13332	24477	13416	71	79	60	1525	0.8318	14264	10228	14700	10321	72	80	58	1400	0.8886	NA	8794	NA	9264	72	79	87	2473	0.8519	19974	13158	19765	13587	-0.0839726	-0.507695	NA	-0.427486	-0.07338	-0.534936
Plate09	71	AAA	9	3	23	CSF1	YLR087C	5	100	194	3953	0.6916	20856	8664	21269	8850	5	99	201	4257	0.756	22819	9204	23301	9392	6	100	187	3831	0.7516	20379	8599	21016	8735	6	99	192	3987	0.7202	20940	8816	21417	9024	-0.189615	-0.127699	-0.190774	-0.204819	-0.169811	-0.111287
Plate12	178	AAA	12	8	10	SHE4	YOR035C	47	78	99	2177	0.7824	17312	7986	17531	8177	47	77	131	2947	0.8025	22248	9731	22677	9998	48	78	103	2328	0.8713	19526	8893	19492	9105	48	77	116	2645	0.7936	21613	9495	21908	9654	-0.257217	-0.119905	-0.237821	-0.13041	-0.238573	-0.115752
Plate06	295	AAA	6	13	7	THR1	YHR025W	57	84	66	1727	0.8352	7153	4171	7487	4255	57	83	82	1971	0.8853	8255	4595	8298	4617	58	84	64	1615	0.8426	6659	3849	7259	3950	58	83	107	2455	0.8304	7288	4521	7793	4558	-0.261566	-0.210294	-0.211309	-0.290642	-0.262733	-0.17103
Plate04	138	AAA	4	6	18	ARG5,6	YER069W	43	14	NA	NA	NA	NA	NA	NA	NA	43	13	NA	NA	NA	NA	NA	NA	NA	44	14	55	1352	0.8274	NA	6034	NA	6300	44	13	74	NA	NA	1396	594	1110	397	NA	NA	NA	-0.25463	NA	NA
Plate13	237	AAA	13	10	21	LEA1	YPL213W	83	56	49	1249	0.9339	NA	5730	NA	5988	83	55	51	1470	0.8261	NA	7537	NA	7690	84	56	63	1875	0.8795	14962	8779	14906	8785	84	55	62	1664	0.7965	11325	7004	11358	7247	NA	NA	-0.268842	-0.429342	NA	NA
Plate02	81	AAA	2	4	9	QRI7	YDL104C	7	80	157	3423	0.8302	37611	29369	39799	30679	7	79	116	2594	0.8959	35828	26993	38839	28562	8	80	157	3519	0.8201	37953	29159	40157	29099	8	79	168	3798	0.8453	37516	27345	39099	26619	-0.277956	-0.226028	-0.196091	-0.125343	-0.318779	-0.285835
Plate07	214	AAA	7	9	22	HOS4	YIL112W	49	102	152	3936	0.8238	27036	17316	27079	18340	49	101	152	3869	0.834	28370	18007	28022	18929	50	102	148	3829	0.8409	27252	16955	26913	17521	50	101	156	3995	0.8797	26956	17209	27050	18097	-0.330312	-0.312351	-0.284371	-0.315706	-0.245697	-0.216304
Plate08	294	AAA	8	13	6	VPS24	YKL041W	25	86	92	1797	0.8169	20151	8974	20799	9131	25	85	75	1459	0.8627	NA	8347	NA	8510	26	86	79	1525	0.8184	19926	8692	20166	8992	26	85	107	2309	0.7832	21536	9432	21982	9485	-0.178037	NA	-0.206344	-0.141126	-0.19176	NA
Plate09	239	AAA	9	10	23	VID22	YLR373C	19	100	142	2955	0.8201	23444	9934	23600	9886	19	99	176	3893	0.807	25524	10464	25574	10472	20	100	159	3542	0.8041	24021	10285	23979	10331	20	99	165	3615	0.7083	23893	10168	23905	10198	-0.176722	-0.130315	-0.211261	-0.19862	-0.171997	-0.111202
Plate10	159	AAA	10	7	15	VPS9	YML097C	77	20	89	2951	0.8498	13200	8024	13300	8347	77	19	58	1760	0.8155	8376	5525	8521	5571	78	20	87	3132	0.8504	13082	7465	13172	7700	78	19	92	3049	0.8323	12677	7382	12789	7776	-0.335236	-0.478957	-0.241925	-0.300653	-0.305906	-0.488233
Plate12	253	AAA	12	11	13	INO4	YOL108C	53	72	51	794	0.7807	NA	5023	NA	5255	53	71	51	583	0.6691	NA	3880	NA	4029	54	72	146	3491	0.8119	19676	8739	20127	8855	54	71	57	624	0.7638	NA	4011	NA	3991	NA	NA	-0.150909	NA	NA	NA
Plate14	276	AAA	14	12	12	BRE1	YDL074C	87	122	75	1671	0.8303	10976	6654	11611	6989	87	121	68	1608	0.8416	11646	6952	12138	7113	88	122	71	1713	0.9033	12089	7114	12619	7254	88	121	66	1626	0.8294	12243	7308	12726	7607	-0.392592	-0.347449	-0.313602	-0.364148	-0.352837	-0.322962
Plate12	274	AAA	12	12	10	CYT1	YOR065W	55	78	114	2424	0.8137	24373	11329	24765	11656	55	77	107	2368	0.831	24400	11288	24939	11434	56	78	103	2309	0.8165	24702	11402	25250	11773	56	77	103	2083	0.7981	22831	10474	23464	10634	-0.167155	-0.131915	-0.14726	-0.142276	-0.166198	-0.159788
Plate04	242	AAA	4	11	2	EMI1	YDR512C	53	46	85	2314	0.8307	15805	9722	16488	10329	53	45	76	2047	0.8668	14618	9094	15162	9582	54	46	68	1780	0.8957	14246	8723	14843	9082	54	45	77	2090	0.9212	15184	9422	15352	10010	-0.304352	-0.32092	-0.276063	-0.364615	-0.265621	-0.283615
Plate02	133	AAA	2	6	13	NA	YDL119C	11	72	165	4019	0.8492	25413	18135	25729	19208	11	71	168	4089	0.838	25342	17266	25562	18021	12	72	170	4070	0.8761	24911	17325	25308	18199	12	71	157	3920	0.834	26220	18133	26043	18933	-0.37374	-0.301139	-0.329749	-0.335764	-0.304774	-0.244251
Plate13	91	AAA	13	4	19	NIP100	YPL174C	71	60	37	756	0.9116	NA	4884	NA	4762	71	59	51	1184	0.8586	NA	6608	NA	7127	72	60	62	1500	0.8246	11535	6906	12087	7307	72	59	76	1989	0.8792	15062	8915	15466	9184	NA	NA	-0.344248	-0.272117	NA	NA
Plate14	345	AAA	14	15	9	COQ2	YNR041C	93	128	71	1811	0.898	32567	23231	34575	24535	93	127	67	1716	0.8535	29907	20774	31379	21528	94	128	63	1770	0.7989	33090	22873	34818	23488	94	127	70	1822	0.845	32171	22615	32892	23934	-0.278811	-0.288483	-0.21565	-0.334955	-0.324819	-0.325227
Plate13	162	AAA	13	7	18	NA	YOR238W	77	62	NA	NA	NA	NA	NA	NA	NA	77	61	131	3125	0.8732	13819	6569	14523	6914	78	62	100	NA	NA	936	272	887	211	78	61	48	NA	NA	851	227	829	197	NA	0.0133753	-0.360767	-0.414749	NA	0.0142722
Plate11	91	AAA	11	4	19	CAF120	YNL278W	39	12	146	3238	0.8035	14654	6524	14905	6631	39	11	147	3070	0.7339	13965	5975	14303	6090	40	12	144	3110	0.7774	14175	6112	14431	6205	40	11	175	3803	0.7625	14905	6586	15276	6650	-0.160937	-0.104689	-0.117049	-0.128394	-0.158521	-0.109668
Plate10	309	AAA	10	13	21	NA	YMR007W	89	8	179	4352	0.783	9026	4816	9407	4885	89	7	159	3976	0.7799	10011	6691	9730	6562	90	8	160	4255	0.8265	10970	5716	10796	5631	90	7	162	4268	0.873	9419	5930	9240	5914	-0.149869	-0.494466	-0.128586	-0.434402	-0.187105	-0.4786
Plate09	237	AAA	9	10	21	NA	YLR374C	19	104	170	3565	0.7263	23332	9694	23535	9715	19	103	181	3857	0.8524	23683	9905	24081	9995	20	104	191	4064	0.715	24013	10088	24289	10163	20	103	177	3652	0.8349	23936	9915	24294	9874	-0.157576	-0.160304	-0.169427	-0.130365	-0.146531	-0.152433
Plate03	51	AAA	3	3	3	NA	YDR090C	5	140	162	3967	0.8847	20111	9807	20773	10163	5	139	160	3900	0.8715	20084	9775	20893	9712	6	140	166	4009	0.8985	20112	9619	20711	10195	6	139	157	3903	0.8377	19967	9629	20689	9919	-0.364526	-0.30351	-0.373324	-0.344467	-0.317492	-0.3161
Plate09	309	AAA	9	13	21	NA	YLR173W	25	104	199	4351	0.8082	27918	12041	28475	12054	25	103	187	4049	0.7869	27936	11941	28302	11942	26	104	194	4271	0.7908	27876	11741	28407	11772	26	103	191	4307	0.812	28375	12051	28761	12071	-0.156586	-0.153153	-0.127993	-0.143293	-0.164889	-0.152525
Plate06	155	AAA	6	7	11	RIM101	YHL027W	45	76	55	1432	0.8909	NA	6298	NA	6467	45	75	56	1397	0.8845	NA	6362	NA	6688	46	76	63	1677	0.8619	11294	6846	11374	6963	46	75	56	1445	0.8409	NA	6263	NA	6637	NA	NA	-0.279717	NA	NA	NA
Plate12	83	AAA	12	4	11	RGS2	YOR107W	39	76	101	1981	0.7482	15190	6664	15078	6779	39	75	111	2257	0.7347	16073	7127	16124	7191	40	76	130	2983	0.7665	19375	8210	19624	8324	40	75	136	3030	0.8214	19081	8170	19447	8303	-0.229417	-0.208577	-0.107866	-0.118485	-0.189173	-0.195444
Plate07	208	AAA	7	9	16	HIS5	YIL116W	49	114	80	NA	NA	1393	312	1352	276	49	113	3	NA	NA	NA	NA	NA	NA	50	114	90	NA	NA	1464	415	1415	330	50	113	18	186	0.6416	NA	3085	NA	3235	-0.0842502	NA	-0.221879	NA	-0.0817928	NA
Plate07	62	AAA	7	3	14	NA	YIL067C	37	118	180	4306	0.8435	25538	13196	26865	13143	37	117	78	1840	0.8744	17830	11585	18731	11857	38	118	44	1266	0.8083	NA	20687	NA	21513	38	117	49	1160	0.8103	NA	12909	NA	12982	0.066773	-0.400292	NA	NA	0.00379082	-0.413473
Plate01	61	AAA	1	3	13	RRN10	YBL025W	5	24	115	NA	NA	1362	561	1210	395	5	23	113	3345	0.8487	20372	13623	20645	13894	6	24	173	4276	0.859	17328	10168	17747	10484	6	23	40	1020	0.8418	NA	5096	NA	5265	0.0718072	-0.317989	-0.170611	NA	-0.137669	-0.318367
Plate09	45	AAA	9	2	21	EST2	YLR318W	3	104	130	NA	NA	7823	2150	6777	1664	3	103	NA	NA	NA	NA	NA	NA	NA	4	104	150	NA	NA	6882	1715	6325	1393	4	103	NA	NA	NA	NA	NA	NA	NA	-0.182687	NA	-0.160739	NA	-0.131909	NA
Plate08	109	AAA	8	5	13	TEF4	YKL081W	9	72	148	3254	0.8419	21813	9579	22125	9509	9	71	153	3242	0.647	21419	9537	21663	9525	10	72	162	3411	0.7532	21996	9612	22497	9687	10	71	149	3091	0.7772	21642	9398	22153	9481	-0.134246	-0.169636	-0.132341	-0.128386	-0.150416	-0.173745
Plate01	215	AAA	1	9	23	NA	YBL065W	17	4	199	4582	0.8479	15966	9490	16283	9721	17	3	195	4481	0.816	16190	9756	16578	9911	18	4	196	4465	0.7979	15514	9166	15649	9355	18	3	194	4407	0.8322	15571	9314	16090	9435	-0.20047	-0.199132	-0.209412	-0.178346	-0.197838	-0.214445
Plate01	172	AAA	1	8	4	TAT1	YBR069C	15	42	175	4012	0.8859	17089	10685	17447	11112	15	41	181	4189	0.8528	17897	10500	17967	10871	16	42	185	4309	0.8418	18099	10805	18285	11212	16	41	184	4280	0.8125	17735	10788	18112	11240	-0.275369	-0.20068	-0.215461	-0.233422	-0.256406	-0.162272
Plate09	41	AAA	9	2	17	MMS22	YLR320W	3	112	102	2006	0.6715	16656	6508	17030	6662	3	111	101	2039	0.7237	20988	8484	21326	8656	4	112	64	835	0.7464	NA	4433	NA	4531	4	111	60	982	0.7025	NA	5277	NA	5406	-0.163786	-0.155926	NA	NA	-0.145818	-0.13204
Plate11	93	AAA	11	4	21	MET2	YNL277W	39	8	NA	NA	NA	NA	NA	NA	NA	39	7	NA	NA	NA	NA	NA	NA	NA	40	8	193	NA	NA	3976	744	3905	652	40	7	NA	NA	NA	NA	NA	NA	NA	NA	NA	-0.111695	NA	NA	NA
Plate13	82	AAA	13	4	10	BTS1	YPL069C	71	78	81	2260	0.8806	13967	8180	14280	8409	71	77	29	262	0.8053	NA	1036	NA	853	72	78	41	944	0.8105	NA	3219	NA	3575	72	77	27	183	0.6635	NA	684	NA	681	-0.275884	NA	NA	NA	-0.265104	NA
Plate03	190	AAA	3	8	22	LYS4	YDR234W	15	102	128	3272	0.8179	37895	29104	39181	30771	15	101	88	NA	NA	2336	634	2204	498	16	102	92	NA	NA	1958	452	1862	364	16	101	102	NA	NA	1713	328	1696	273	-0.365099	-0.323604	-0.195289	0.0176806	-0.340603	-0.422441
Plate02	199	AAA	2	9	7	RVS161	YCR009C	17	84	83	2291	0.7796	29456	20625	29622	21123	17	83	106	2737	0.8473	32904	22657	34194	23842	18	84	109	2787	0.8875	33876	24030	35231	25247	18	83	80	2225	0.8822	30185	21839	30838	22677	-0.273121	-0.19959	-0.225048	-0.300517	-0.243084	-0.19192
Plate04	28	AAA	4	2	4	FCY2	YER056C	35	42	75	2023	0.7725	12598	6937	12351	6950	35	41	76	2098	0.7888	11952	6882	12102	6738	36	42	76	2096	0.8174	11628	7563	12380	7755	36	41	64	1618	0.803	10126	6321	10224	6535	-0.165881	-0.151795	-0.317968	-0.355723	-0.112695	-0.177959
Plate11	40	AAA	11	2	16	EAF7	YNL136W	35	18	139	2955	0.7022	16559	7181	16773	7361	35	17	143	3184	0.7239	16966	7405	17158	7506	36	18	146	3158	0.7917	16451	7158	16915	7360	36	17	127	2777	0.6927	15617	6777	15917	6972	-0.134405	-0.129259	-0.121919	-0.134104	-0.112743	-0.12108
Plate14	155	AAA	14	7	11	NA	YPR147C	77	124	182	4385	0.8363	23722	14587	24148	14966	77	123	170	4110	0.8908	23094	14624	23454	15130	78	124	185	4442	0.8589	23883	15327	24173	15627	78	123	167	4051	0.8495	23953	14961	23996	15586	-0.263791	-0.324414	-0.317668	-0.326073	-0.23822	-0.283558
Plate12	31	AAA	12	2	7	NA	YOR093C	35	84	98	1971	0.6002	15537	6482	15649	6610	35	83	103	2095	0.6919	15847	6531	15923	6603	36	84	92	1786	0.6697	14027	5857	14205	5945	36	83	90	1589	0.6404	12747	5491	12910	5552	-0.138442	-0.110623	-0.14268	-0.198989	-0.117043	-0.0972683
Plate12	181	AAA	12	8	13	IDH2	YOR136W	47	72	94	2005	0.7219	17375	7443	18005	7652	47	71	57	915	0.7815	NA	5350	NA	5322	48	72	66	850	0.7199	NA	4829	NA	4828	48	71	57	687	0.6502	NA	4128	NA	3999	-0.126321	NA	NA	NA	-0.136978	NA
Plate12	85	AAA	12	4	13	VAM3	YOR106W	39	72	146	3544	0.7794	18545	8005	18664	8163	39	71	45	339	0.8176	NA	2183	NA	2126	40	72	180	193	0.6494	NA	1372	NA	1267	40	71	64	625	0.7724	NA	3013	NA	3081	-0.158926	NA	NA	NA	-0.136915	NA
Plate04	124	AAA	4	6	4	NA	YER078C	43	42	NA	NA	NA	NA	NA	NA	NA	43	41	NA	NA	NA	NA	NA	NA	NA	44	42	127	NA	NA	1031	379	946	315	44	41	61	NA	NA	834	219	814	187	NA	NA	-0.293956	-0.0444939	NA	NA
Plate01	86	AAA	1	4	14	CSG2	YBR036C	7	22	68	1639	0.89	12447	7232	13047	7347	7	21	75	1739	0.913	13522	7688	13880	7986	8	22	73	1848	0.846	14006	8107	14546	8211	8	21	75	1716	0.7982	12195	7073	12872	7259	-0.160541	-0.178854	-0.144741	-0.164868	-0.20261	-0.161295
Plate12	281	AAA	12	12	17	LCB4	YOR171C	55	64	185	4208	0.7902	20893	9071	21335	9207	55	63	169	3769	0.7628	20241	8966	20584	9138	56	64	169	3758	0.8469	20649	9006	21102	9202	56	63	161	3566	0.8303	20099	8715	20756	8857	-0.11077	-0.15732	-0.127375	-0.103119	-0.12142	-0.155108
Plate08	205	AAA	8	9	13	RAD27	YKL113C	17	72	134	2810	0.6799	22319	9687	22907	9836	17	71	129	2589	0.8134	21300	9329	22156	9483	18	72	125	2733	0.7839	22100	9610	22405	9636	18	71	124	2624	0.7847	21734	9354	22479	9544	-0.123908	-0.12845	-0.131868	-0.114095	-0.128368	-0.154052
Plate11	138	AAA	11	6	18	NA	YNL170W	43	14	124	2659	0.7877	16030	6947	16541	7019	43	13	163	3761	0.7845	15868	6891	16284	7056	44	14	133	2938	0.8489	16852	7267	17350	7417	44	13	143	3374	0.7807	15254	6593	15531	6623	-0.0871035	-0.117536	-0.0960046	-0.098128	-0.11348	-0.117023
Plate06	334	AAA	6	14	22	CRP1	YHR146W	59	54	149	3762	0.8723	37967	23618	39444	24764	59	53	168	3975	0.858	39690	30203	41360	32119	60	54	167	4153	0.8265	38072	23513	39708	23913	60	53	151	3649	0.8522	38814	24760	39855	25372	-0.145696	-0.430276	-0.087683	-0.163215	-0.12571	-0.400337
Plate02	109	AAA	2	5	13	NA	YCL044C	9	72	138	3398	0.8738	29379	20458	30094	21449	9	71	129	3171	0.898	28853	19664	29306	20891	10	72	142	3518	0.8677	29691	20473	30025	21370	10	71	136	3334	0.8327	28337	19194	29373	20297	-0.26771	-0.275923	-0.266605	-0.234964	-0.236511	-0.212791
Plate11	38	AAA	11	2	14	NA	YNL140C	35	22	196	4670	0.7673	18624	8032	18757	8112	35	21	176	4128	0.7977	17716	7678	17799	7788	36	22	185	4314	0.7586	17844	7712	18154	7774	36	21	191	4309	0.8025	17542	7685	17825	7781	-0.112807	-0.129141	-0.0980641	-0.125737	-0.103436	-0.110228
Plate09	87	AAA	9	4	15	VRP1	YLR337C	7	116	86	1730	0.6983	20833	8548	21367	8607	7	115	61	902	0.8297	NA	5621	NA	5643	8	116	72	1362	0.7714	NA	7959	NA	8285	8	115	117	2587	0.7547	26427	10785	27385	10888	-0.145381	NA	NA	-0.0779769	-0.153565	NA
Plate11	119	AAA	11	5	23	IDH1	YNL037C	41	4	91	1821	0.8302	11896	5051	12220	5251	41	3	146	2956	0.7358	13592	5794	14130	5991	42	4	128	2598	0.7701	13268	5683	13782	5786	42	3	148	3032	0.7698	13964	5867	14411	5972	-0.14638	-0.100574	-0.0909065	-0.0664233	-0.131992	-0.108901
Plate12	209	AAA	12	9	17	MSH2	YOL090W	49	64	170	3579	0.8324	17134	7612	17540	7806	49	63	139	2816	0.7551	16031	6889	16460	7058	50	64	136	2704	0.7497	16001	6746	16613	6926	50	63	157	3317	0.724	17831	7216	18433	7333	-0.193339	-0.151756	-0.111827	-0.0325873	-0.188869	-0.152789
Plate12	239	AAA	12	10	23	LSC1	YOR142W	51	52	165	3601	0.8003	21497	9836	21914	9954	51	51	98	2174	0.7047	20164	9022	20249	9147	52	52	140	3075	0.8259	24109	10361	25019	10629	52	51	133	2924	0.7618	21732	9355	22015	9517	-0.169326	-0.184353	-0.0364619	-0.104185	-0.183931	-0.169333
Plate04	30	AAA	4	2	6	HIS1	YER055C	35	38	60	1494	0.7688	NA	6161	NA	6179	35	37	72	2024	0.7951	13767	8180	13667	8626	36	38	40	1032	0.8108	NA	4193	NA	4339	36	37	NA	NA	NA	NA	NA	NA	NA	NA	-0.324021	NA	NA	NA	-0.219306
Plate04	93	AAA	4	4	21	RAD4	YER162C	39	8	57	1606	0.8627	26905	15906	26898	15991	39	7	51	1263	0.8778	NA	11837	NA	11903	40	8	73	NA	NA	1967	862	1215	433	40	7	61	NA	NA	1450	640	1121	452	-0.201019	NA	-0.190418	-0.380788	-0.194752	NA
Plate07	277	AAA	7	12	13	NA	YJR079W	55	120	163	3986	0.8706	25292	14839	26421	15194	55	119	160	4030	0.8598	25268	15653	26157	15687	56	120	156	3883	0.9049	25987	15411	27399	15685	56	119	162	4053	0.8459	26152	15460	27236	15801	-0.139539	-0.195475	-0.118579	-0.137521	-0.159912	-0.228733
Plate12	172	AAA	12	8	4	CKB2	YOR039W	47	90	77	1146	0.676	NA	4884	NA	4720	47	89	87	1818	0.6025	13755	5694	13517	5678	48	90	71	832	0.7805	NA	4085	NA	3961	48	89	73	1175	0.539	NA	5059	NA	5080	NA	-0.157632	NA	NA	NA	-0.128806
Plate01	162	AAA	1	7	18	NA	YAL037W	13	14	211	5177	0.8606	15453	9041	15718	9154	13	13	220	5139	0.8477	14532	8479	14930	8552	14	14	219	5153	0.85	15429	9078	15726	9301	14	13	212	4997	0.8385	15390	8847	15732	9059	-0.173275	-0.159964	-0.194057	-0.157791	-0.181143	-0.186472
Plate11	179	AAA	11	8	11	NA	YNL311C	47	28	118	2653	0.8033	20079	8597	20343	8709	47	27	127	2775	0.7345	20068	8690	20404	8939	48	28	107	2314	0.7615	18693	8086	18982	8340	48	27	120	2565	0.7609	19281	8411	19480	8691	-0.101341	-0.135571	-0.136145	-0.159639	-0.0956116	-0.112212
Plate02	282	AAA	2	12	18	NA	YDL041W	23	62	NA	NA	NA	NA	NA	NA	NA	23	61	NA	NA	NA	NA	NA	NA	NA	24	62	123	NA	NA	1322	389	1269	272	24	61	73	NA	NA	1258	327	1222	303	NA	NA	-0.0627169	-0.250734	NA	NA
Plate04	126	AAA	4	6	6	NA	YER077C	43	38	115	3097	0.8587	21152	12672	21614	12875	43	37	125	3265	0.8472	21183	12722	22203	12987	44	38	122	3220	0.846	21351	12695	22375	13134	44	37	113	3090	0.839	21774	12917	22308	13523	-0.218437	-0.191069	-0.19559	-0.241208	-0.220856	-0.224354
Plate07	78	AAA	7	4	6	PBS2	YJL128C	39	134	157	3640	0.872	15662	8231	16482	8505	39	133	163	3808	0.8893	16387	8647	16987	8972	40	134	140	3360	0.8859	15786	8090	16595	8329	40	133	160	3698	0.8806	16291	8598	17011	8978	-0.197379	-0.214395	-0.160137	-0.212909	-0.188123	-0.177917
Plate06	82	AAA	6	4	10	IRE1	YHR079C	39	78	57	1566	0.8515	15272	8946	15702	9091	39	77	60	1810	0.8844	17727	11125	18482	11367	40	78	63	1765	0.8328	16240	9817	16493	9897	40	77	75	2059	0.8416	17391	10848	17979	10930	-0.156935	-0.219073	-0.199729	-0.206549	-0.146304	-0.223976
Plate10	99	AAA	10	5	3	ATP18	YML081C-A	73	44	132	3565	0.8497	13288	7511	13512	7620	73	43	111	2839	0.8913	10003	5736	9932	5695	74	44	143	3707	0.8492	11750	6732	11873	6726	74	43	126	3373	0.8039	12101	6994	12271	7221	-0.188571	-0.272364	-0.220648	-0.265099	-0.205674	-0.269572
Plate01	147	AAA	1	7	3	PRX1	YBL064C	13	44	167	3865	0.8035	17602	10696	17763	11281	13	43	161	3778	0.8109	18445	10869	18599	11439	14	44	159	3793	0.884	19012	11097	19177	11524	14	43	171	3886	0.8422	18222	10836	18612	11397	-0.268205	-0.21638	-0.179376	-0.210342	-0.212783	-0.163391
Plate10	215	AAA	10	9	23	NUP188	YML103C	81	4	84	2006	0.8255	4845	2404	4984	2527	81	3	140	3172	0.8238	5593	3054	5698	3023	82	4	94	2496	0.8191	7741	4119	7736	4214	82	3	94	2420	0.7479	5794	3143	5990	3189	-0.238653	-0.276399	-0.252626	-0.2718	-0.179061	-0.291776
Plate03	81	AAA	3	4	9	NA	YDR332W	7	128	125	2962	0.8951	21044	9903	22301	10086	7	127	77	1937	0.8503	19437	8633	20479	9201	8	128	126	3023	0.7946	20666	9838	22009	10118	8	127	123	2989	0.8746	21155	9849	22129	10193	-0.230474	-0.277974	-0.257347	-0.255944	-0.249457	-0.230308
Plate13	108	AAA	13	5	12	NA	YOR228C	73	74	108	3006	0.8677	22430	12803	22580	13021	73	73	111	2992	0.8568	20421	12248	19967	11928	74	74	126	3153	0.8251	16245	9612	16332	9641	74	73	89	2463	0.8559	20587	12830	20501	12631	-0.166439	-0.234997	-0.254099	-0.272522	-0.148081	-0.231039
Plate13	43	AAA	13	2	19	BEM4	YPL161C	67	60	124	3117	0.8353	9222	4687	9433	4734	67	59	100	2865	0.8809	12130	6097	11967	5900	68	60	80	NA	NA	900	304	857	234	68	59	105	2793	0.7647	14178	6935	13921	7054	-0.151034	-0.0735609	-0.532127	-0.0788633	-0.158297	-0.0861918
Plate11	88	AAA	11	4	16	NSG2	YNL156C	39	18	191	4418	0.7569	16615	7109	16821	7266	39	17	198	4424	0.8128	16641	7241	16952	7355	40	18	194	4351	0.7448	16950	7347	17268	7417	40	17	207	4673	0.7324	16936	7237	17153	7347	-0.111711	-0.117765	-0.102889	-0.0990418	-0.0934801	-0.117353
Plate11	31	AAA	11	2	7	BNI1	YNL271C	35	36	138	2959	0.7267	20014	7871	20588	7965	35	35	88	1478	0.7237	NA	5431	NA	5644	36	36	192	268	0.6189	NA	1395	NA	1183	36	35	39	NA	NA	5283	1610	5066	1580	0.0467446	NA	NA	-0.320499	0.0289711	NA
Plate12	248	AAA	12	11	8	HTZ1	YOL012C	53	82	122	2510	0.8863	15881	6659	16477	6873	53	81	118	2403	0.8529	15482	6488	15951	6659	54	82	129	2653	0.7807	16209	6816	16585	7078	54	81	127	2589	0.7858	16006	6707	16194	6958	-0.1137	-0.119503	-0.144216	-0.156778	-0.120537	-0.123703
Plate08	266	AAA	8	12	2	DID2	YKR035W-A	23	94	175	3655	0.7461	27030	12061	27798	12149	23	93	169	3507	0.7451	26541	12220	27243	12181	24	94	168	3553	0.8205	27771	12806	28655	12817	24	93	184	3848	0.8335	27364	12394	28229	12495	-0.0898542	-0.12566	-0.108479	-0.100686	-0.100625	-0.146801
Plate09	110	AAA	9	5	14	MHT1	YLL062C	9	118	199	4488	0.7646	26664	11062	26936	11156	9	117	192	4240	0.752	26482	11012	27065	11058	10	118	191	4245	0.7566	26413	10889	26903	11002	10	117	198	4329	0.7939	26610	10920	27079	11006	-0.136223	-0.116956	-0.119273	-0.10978	-0.119528	-0.123851
Plate03	187	AAA	3	8	19	VID21	YDR359C	15	108	74	NA	NA	2784	920	2666	738	15	107	35	NA	NA	1604	267	1547	231	16	108	136	3628	0.8114	37714	24127	39216	26068	16	107	84	122	0.6207	NA	976	NA	592	-0.523205	0.0778909	-0.200283	NA	-0.618548	0.0572899
Plate13	77	AAA	13	4	5	NA	YPL182C	71	88	133	3258	0.8127	12758	6991	12872	7110	71	87	175	4128	0.8765	11899	6740	11935	6584	72	88	131	3239	0.8951	10355	5972	10924	6079	72	87	151	3693	0.8538	13184	6999	13705	6918	-0.210416	-0.224267	-0.254918	-0.0768781	-0.192501	-0.250606
Plate01	60	AAA	1	3	12	MDM10	YAL010C	5	26	149	3570	0.8195	22776	13297	24080	13782	5	25	133	3208	0.8413	22379	13673	23553	14041	6	26	126	3214	0.8632	23334	14770	24490	15045	6	25	150	3501	0.8553	21707	12897	23041	13111	-0.0699346	-0.129068	-0.161605	-0.0708386	-0.114671	-0.179334
Plate11	140	AAA	11	6	20	PSD1	YNL169C	43	10	94	1854	0.7599	13102	5509	13686	5756	43	9	112	2169	0.7543	13345	5640	13868	5901	44	10	84	1642	0.7555	12602	5299	12926	5571	44	9	102	2007	0.7337	13327	5632	13630	5814	-0.0945027	-0.108261	-0.138045	-0.114387	-0.0970316	-0.100454
Plate11	215	AAA	11	9	23	RPL16B	YNL069C	49	4	189	4476	0.7779	18629	7890	18896	7975	49	3	196	4719	0.7682	19012	8163	19315	8287	50	4	177	4014	0.7418	17137	7481	17494	7516	50	3	182	4229	0.751	17815	7700	18057	7665	-0.0774797	-0.102047	-0.103016	-0.0854126	-0.0771714	-0.0974585
Plate04	58	AAA	4	3	10	NA	YDR431W	37	30	126	2713	0.8439	9448	5483	10158	5659	37	29	118	2706	0.8138	9216	5398	9815	5438	38	30	107	2497	0.7985	9091	5260	9387	5317	38	29	113	2681	0.8609	9267	5377	9644	5370	-0.161361	-0.155565	-0.18945	-0.163665	-0.196587	-0.210795
Plate04	318	AAA	4	14	6	NA	YER139C	59	38	95	2673	0.8363	10744	6300	11102	6539	59	37	85	2465	0.8749	10924	6377	11084	6522	60	38	96	2713	0.8488	11007	6480	11147	6616	60	37	93	2567	0.8362	11119	6381	11459	6601	-0.235735	-0.234422	-0.246412	-0.202708	-0.206912	-0.200057
Plate03	186	AAA	3	8	18	BUD26	YDR241W	15	110	164	3986	0.8463	46759	39187	48924	41834	15	109	168	3829	0.8162	44868	35655	47176	36791	16	110	152	3716	0.8213	45777	38956	47844	41286	16	109	163	3936	0.8294	46616	38683	48266	39595	-0.228708	-0.179061	-0.259987	-0.203736	-0.231064	-0.219401
Plate03	329	AAA	3	14	17	STE14	YDR410C	27	112	84	NA	NA	2020	449	1952	381	27	111	NA	NA	NA	NA	NA	NA	NA	28	112	111	NA	NA	1948	439	1847	374	28	111	NA	NA	NA	NA	NA	NA	NA	-0.177164	NA	-0.242791	NA	-0.217899	NA
Plate03	318	AAA	3	14	6	SSD1	YDR293C	27	134	80	2175	0.8475	20206	10025	20613	10411	27	133	83	2247	0.8369	22521	11092	22383	11646	28	134	90	2412	0.8646	21021	9195	21660	9316	28	133	100	2479	0.7815	21075	9226	22238	9380	-0.405148	-0.383331	-0.193227	-0.154433	-0.334364	-0.25875
Plate02	129	AAA	2	6	9	UBP1	YDL122W	11	80	96	2416	0.876	21598	13054	22250	13577	11	79	135	3311	0.8873	20897	13120	21820	13289	12	80	117	3176	0.8511	31325	23119	32788	23947	12	79	65	1778	0.8909	18960	11555	19469	11919	-0.151202	-0.153998	-0.272499	-0.191426	-0.123012	-0.181103
Plate10	89	AAA	10	4	17	HLJ1	YMR161W	71	16	NA	NA	NA	NA	NA	NA	NA	71	15	NA	NA	NA	NA	NA	NA	NA	72	16	99	NA	NA	726	273	694	222	72	15	90	NA	NA	675	207	656	170	NA	NA	-0.235081	-0.0386742	NA	NA
Plate14	60	AAA	14	3	12	ACM1	YPL267W	69	122	132	3262	0.8284	19796	11291	19744	11601	69	121	138	3326	0.8332	19712	11680	20126	11652	70	122	146	3444	0.8776	20142	12260	20631	12685	70	121	128	3168	0.864	25782	15860	26379	16516	-0.248676	-0.224566	-0.29789	-0.2474	-0.17681	-0.229036
Plate12	143	AAA	12	6	23	AZF1	YOR113W	43	52	77	1432	0.5944	NA	5044	NA	4970	43	51	85	1717	0.6209	14221	5848	14094	5829	44	52	159	326	0.7014	NA	923	NA	811	44	51	63	1065	0.7186	NA	4544	NA	4513	NA	-0.12825	NA	NA	NA	-0.11319
Plate03	85	AAA	3	4	13	PEX3	YDR329C	7	120	106	2452	0.8279	21903	10420	23417	10990	7	119	111	2625	0.85	22709	10589	24434	11095	8	120	93	2178	0.8533	21489	10150	22844	10672	8	119	92	2200	0.8699	22148	10563	23665	10919	-0.238887	-0.173558	-0.250517	-0.212962	-0.237153	-0.191851
Plate02	287	AAA	2	12	23	STE7	YDL159W	23	52	NA	NA	NA	NA	NA	NA	NA	23	51	NA	NA	NA	NA	NA	NA	NA	24	52	NA	NA	NA	NA	NA	NA	NA	24	51	70	NA	NA	1218	318	1186	309	NA	NA	NA	-0.325399	NA	NA
Plate01	256	AAA	1	11	16	NUP60	YAR002W	21	18	140	3436	0.8563	17409	10186	17725	10376	21	17	154	3727	0.8811	16628	9732	16952	10037	22	18	166	4128	0.8177	18198	10525	18472	10888	22	17	171	4168	0.8429	17774	10249	18024	10573	-0.15852	-0.182006	-0.160245	-0.158272	-0.162952	-0.170512
Plate12	187	AAA	12	8	19	EFT1	YOR133W	47	60	106	2245	0.8059	17620	7416	17656	7529	47	59	64	746	0.6328	NA	3898	NA	3950	48	60	53	433	0.759	NA	2893	NA	2679	48	59	61	983	0.6859	NA	5260	NA	5346	-0.134119	NA	NA	NA	-0.110737	NA
Plate01	58	AAA	1	3	10	SWC3	YAL011W	5	30	170	3677	0.8613	12855	7186	13564	7343	5	29	166	3737	0.8434	12737	7079	13353	7098	6	30	156	3505	0.8893	13083	7417	13782	7491	6	29	154	3575	0.909	13070	7408	13729	7462	-0.100346	-0.078338	-0.102995	-0.103634	-0.145092	-0.13842
Plate01	195	AAA	1	9	3	NUP170	YBL079W	17	44	116	2641	0.8646	14198	8007	14838	8222	17	43	121	2657	0.8729	14416	8058	14964	8350	18	44	106	2533	0.8307	15653	8803	16398	9133	18	43	116	2682	0.8663	14876	8842	15564	9098	-0.116129	-0.124108	-0.105277	-0.180051	-0.143203	-0.128832
Plate06	148	AAA	6	7	4	SER2	YGR208W	45	90	117	3114	0.8255	11836	6815	12005	7068	45	89	110	2967	0.8449	11752	6815	12055	7092	46	90	121	3260	0.8149	12365	7216	12668	7524	46	89	120	3045	0.8517	11831	6867	12039	7143	-0.21796	-0.216268	-0.221805	-0.228069	-0.155922	-0.166708
Plate07	37	AAA	7	2	13	PEX2	YJL210W	35	120	98	2205	0.82	17674	9297	18681	9733	35	119	97	2225	0.7618	17864	9420	18859	9535	36	120	87	2024	0.7126	17116	8887	17738	9235	36	119	85	2104	0.8077	16787	8753	16961	8994	-0.159611	-0.118487	-0.179338	-0.219956	-0.148179	-0.147641
Plate09	214	AAA	9	9	22	UBR2	YLR024C	17	102	126	2733	0.8253	24320	9821	25163	9844	17	101	131	2786	0.7323	23424	9460	23998	9506	18	102	123	2652	0.7888	23813	9626	24419	9613	18	101	122	2624	0.8287	23674	9542	24743	9597	-0.0720738	-0.0983247	-0.0864882	-0.0639102	-0.100081	-0.107659
Plate10	37	AAA	10	2	13	NUP53	YMR153W	67	24	88	NA	NA	743	338	718	280	67	23	182	4668	0.8507	9778	4547	9965	4565	68	24	186	4806	0.8504	9565	4694	9711	4585	68	23	118	NA	NA	685	239	669	221	-0.441806	0.0300118	-0.0156586	-0.294478	-0.516631	0.0130103
Plate02	314	AAA	2	14	2	VAM6	YDL077C	27	94	31	580	0.6905	NA	6778	NA	6873	27	93	154	3987	0.8328	34966	24145	36229	25053	28	94	48	1080	0.8485	NA	9697	NA	9819	28	93	44	1013	0.8722	NA	8529	NA	8878	NA	-0.170333	NA	NA	NA	-0.179005
Plate07	159	AAA	7	7	15	GTT1	YIR038C	45	116	176	4326	0.8387	21453	11725	22160	12242	45	115	176	4381	0.8582	21307	11868	22086	12167	46	116	178	4406	0.8446	21351	11852	21858	12281	46	115	176	4295	0.8065	21184	11729	21989	12272	-0.16309	-0.160997	-0.189638	-0.178885	-0.12941	-0.155815
Plate06	57	AAA	6	3	9	HSE1	YHL002W	37	80	116	3266	0.8475	22851	13688	23782	14469	37	79	100	2859	0.8489	21710	13290	22720	13833	38	80	102	2967	0.8264	22083	13609	22545	13989	38	79	87	2457	0.8798	19923	12187	20375	12569	-0.172547	-0.179241	-0.206358	-0.210971	-0.130999	-0.166749
Plate11	239	AAA	11	10	23	NA	YNL319W	51	4	175	3707	0.7608	14693	6250	15009	6410	51	3	202	4414	0.7349	15086	6416	15310	6587	52	4	194	4471	0.7557	15366	6473	15631	6584	52	3	189	4210	0.8402	15544	6639	15712	6733	-0.103286	-0.111763	-0.0803275	-0.104091	-0.0949671	-0.0919034
Plate11	214	AAA	11	9	22	NGL2	YMR285C	49	6	156	3457	0.7477	16666	7148	17095	7207	49	5	152	3134	0.7383	14557	6052	15009	6222	50	6	154	3362	0.8209	15894	6716	16275	6879	50	5	182	3980	0.7963	17058	7426	17435	7599	-0.0765025	-0.0618917	-0.0823819	-0.123679	-0.0967672	-0.0644791
Plate02	189	AAA	2	8	21	VCX1	YDL128W	15	56	145	3232	0.8318	14824	8757	15564	9021	15	55	79	1891	0.8922	14489	8039	15082	8407	16	56	145	3323	0.8545	15581	9731	16412	9888	16	55	91	2241	0.8804	14365	8482	15067	8688	-0.179564	-0.137187	-0.216001	-0.181672	-0.177961	-0.10018
Plate02	136	AAA	2	6	16	NA	YCR095C	11	66	185	4509	0.8375	22095	13822	22880	13884	11	65	189	4487	0.8244	22557	14240	23499	14482	12	66	189	4646	0.8525	22257	14062	22973	14182	12	65	188	4585	0.861	22370	14344	23106	14635	-0.136347	-0.149307	-0.1577	-0.189668	-0.163442	-0.170746
Plate01	122	AAA	1	6	2	UBP14	YBR058C	11	46	168	4121	0.7788	22660	13436	22450	13625	11	45	176	4163	0.8539	20100	12077	19727	12118	12	46	177	4111	0.8739	22513	13046	22884	13180	12	45	174	4168	0.8295	20809	12411	20886	12682	-0.162582	-0.203741	-0.0884309	-0.177257	-0.136561	-0.175612
Plate07	54	AAA	7	3	6	SPO22	YIL073C	37	134	119	2794	0.8175	16615	9207	17270	9548	37	133	104	2494	0.8797	16531	8095	17509	8490	38	134	101	2467	0.8036	16784	8166	17679	8499	38	133	114	2614	0.8841	16143	8560	16955	8971	-0.26469	-0.0960109	-0.0814744	-0.21735	-0.235479	-0.0798469
Plate03	30	AAA	3	2	6	NA	YDR193W	3	134	147	3174	0.791	20832	9516	21481	9403	3	133	144	3181	0.8131	21358	9831	22191	9692	4	134	138	3132	0.8385	20674	9398	21614	9491	4	133	133	3030	0.8609	21691	9747	22880	9771	-0.21829	-0.194769	-0.217849	-0.149722	-0.221686	-0.215271
Plate13	256	AAA	13	11	16	CAF20	YOR276W	85	66	180	4374	0.8457	16781	9811	17644	9954	85	65	111	2805	0.8416	16709	9248	17429	9605	86	66	3	290	0.7629	NA	NA	NA	NA	86	65	7	147	0.6465	NA	NA	NA	NA	-0.178872	-0.149371	NA	NA	-0.229777	-0.156296
Plate14	258	AAA	14	11	18	MAK3	YPR051W	85	110	108	2648	0.8934	20319	12107	21512	12749	85	109	105	2552	0.8255	19795	11487	20871	11807	86	110	111	2633	0.8496	19808	11362	21081	12141	86	109	98	2435	0.8358	21360	12355	22332	12747	-0.238778	-0.185256	-0.20637	-0.179686	-0.23066	-0.200107
Plate07	35	AAA	7	2	11	NA	YJL211C	35	124	120	2730	0.8642	17340	8980	18320	9538	35	123	117	2757	0.8485	18526	9637	18856	10138	36	124	113	2713	0.8187	17792	9374	18472	9772	36	123	115	2617	0.7897	17678	9393	18346	9728	-0.166493	-0.194953	-0.183059	-0.188689	-0.134824	-0.117856
Plate02	326	AAA	2	14	14	PEX19	YDL065C	27	70	129	3045	0.8191	16147	9680	17161	10190	27	69	102	2424	0.8789	15148	8847	15994	9188	28	70	129	3114	0.8947	16531	9909	17392	10083	28	69	136	3242	0.8524	16560	9932	17301	10040	-0.185088	-0.160556	-0.150195	-0.152863	-0.178064	-0.157848
Plate01	254	AAA	1	11	14	SWD1	YAR003W	21	22	111	2705	0.8243	12465	6806	12822	7064	21	21	108	2578	0.8654	11970	6665	12369	6878	22	22	105	2574	0.8813	12031	6639	12338	6834	22	21	94	2259	0.8874	11591	6471	12220	6709	-0.133915	-0.152796	-0.147941	-0.137642	-0.116993	-0.149445
Plate08	88	AAA	8	4	16	PEX1	YKL197C	7	66	102	1942	0.7863	17989	7396	18332	7616	7	65	117	2303	0.6381	19199	7799	19750	7929	8	66	105	2092	0.6222	18749	7644	19177	7796	8	65	110	2024	0.7595	17928	7327	18719	7566	-0.13689	-0.0732338	-0.0970648	-0.0954658	-0.119331	-0.08565
Plate03	58	AAA	3	3	10	RPL35A	YDL191W	5	126	137	3548	0.8059	30114	16352	31012	16575	5	125	130	3191	0.8049	27187	15082	28220	15528	6	126	126	3334	0.8697	29962	16134	30822	16237	6	125	138	3459	0.8304	28589	15722	29601	16430	-0.174457	-0.27787	-0.164034	-0.250497	-0.166679	-0.263969
Plate13	225	AAA	13	10	9	FMP40	YPL222W	83	80	NA	NA	NA	NA	NA	NA	NA	83	79	199	4713	0.8567	19938	10776	21133	11071	84	80	165	4166	0.8199	20971	10932	22312	11479	84	79	103	2869	0.8144	13220	8705	13393	8952	NA	-0.0470578	-0.0133429	-0.458826	NA	-0.0935608
Plate08	31	AAA	8	2	7	RPS21A	YKR057W	3	84	184	3966	0.7586	23855	10194	24266	10293	3	83	167	3445	0.742	22427	9744	22729	9889	4	84	180	3826	0.7832	23144	10019	23614	10287	4	83	184	3929	0.7238	23552	9980	23738	9987	-0.0925461	-0.143235	-0.134818	-0.0878063	-0.0880156	-0.128245
Plate02	186	AAA	2	8	18	NHP10	YDL002C	15	62	101	2264	0.9012	11483	6230	12190	6448	15	61	100	2076	0.8263	10667	5940	11243	6121	16	62	120	2671	0.867	11730	6573	12465	6802	16	61	117	2514	0.8845	11298	6434	11827	6508	-0.130263	-0.191938	-0.163933	-0.19038	-0.128059	-0.181498
Plate07	224	AAA	7	10	8	TPK1	YJL164C	51	130	126	2952	0.8426	15991	8144	17195	8481	51	129	126	2809	0.8167	16569	8539	17803	8934	52	130	124	2927	0.8711	17006	8622	17913	8788	52	129	121	2862	0.8587	16365	8415	17586	8696	-0.124383	-0.132111	-0.101502	-0.118644	-0.141078	-0.144109
Plate08	270	AAA	8	12	6	DAL80	YKR034W	23	86	172	3603	0.8247	28772	13439	29661	13532	23	85	182	3808	0.788	28585	13059	29884	12879	24	86	167	3539	0.7806	28776	12986	29708	12870	24	85	196	4334	0.7995	29399	13208	30201	13144	-0.119922	-0.0460088	-0.0547935	-0.0541214	-0.132798	-0.108181
Plate02	188	AAA	2	8	20	RMD1	YDL001W	15	58	163	3861	0.8671	19438	12076	19943	12466	15	57	162	3774	0.8458	19504	11714	20041	12010	16	58	165	3890	0.8627	19877	12375	20479	12512	16	57	164	3825	0.853	19439	11850	20091	12078	-0.212228	-0.155741	-0.1752	-0.159202	-0.183601	-0.137878
Plate13	143	AAA	13	6	23	GON5	YPL183W-A	75	52	76	1952	0.78	18158	10180	17885	9914	75	51	79	2042	0.815	16424	9641	16830	9949	76	52	117	2997	0.8211	21373	12181	22277	12598	76	51	58	1389	0.8612	NA	6387	NA	6801	-0.152641	-0.250572	-0.142166	NA	-0.159231	-0.239008
Plate01	299	AAA	1	13	11	RTG3	YBL103C	25	28	155	3774	0.9079	21016	12382	21858	12749	25	27	152	3636	0.8604	20138	12231	20798	12921	26	28	143	3595	0.863	22534	13010	23499	13499	26	27	144	3450	0.9028	20938	12057	22121	12636	-0.114345	-0.208897	-0.0797127	-0.0839495	-0.141318	-0.189924
Plate07	150	AAA	7	7	6	PFK26	YIL107C	45	134	169	3985	0.7879	15252	7661	15997	7926	45	133	178	4085	0.8649	15438	7806	16212	7780	46	134	171	3942	0.8509	15382	7711	16095	7757	46	133	165	3955	0.8889	15846	7930	16598	8217	-0.158563	-0.113512	-0.1217	-0.142983	-0.139494	-0.143838
Plate09	349	AAA	9	15	13	MMR1	YLR190W	29	120	180	3902	0.8132	28989	11869	29781	11932	29	119	126	2690	0.7845	26483	10692	27458	10882	30	120	122	2439	0.7242	26320	10930	27356	11085	30	119	138	2904	0.764	27115	10963	28053	11110	-0.0744656	-0.0731548	-0.103895	-0.0684749	-0.0880322	-0.0838242
Plate03	178	AAA	3	8	10	NA	YDR248C	15	126	134	3312	0.8686	20425	10277	21297	10757	15	125	113	2852	0.846	22980	11086	23740	11685	16	126	128	3205	0.8561	22827	11184	23777	11732	16	125	95	2488	0.8614	30200	13712	31012	13806	-0.38381	-0.282	-0.283631	0.0190568	-0.343812	-0.222623
Plate06	89	AAA	6	4	17	PTH1	YHR189W	39	64	92	2572	0.8883	27655	16860	28294	17125	39	63	88	2494	0.8797	27935	17118	28776	17447	40	64	88	2298	0.8482	24117	14723	25388	15425	40	63	96	2592	0.7572	27202	16911	28419	17744	-0.142902	-0.142985	-0.162474	-0.185047	-0.134307	-0.140242
Plate14	70	AAA	14	3	22	NA	YPL261C	69	102	NA	NA	NA	NA	NA	NA	NA	69	101	NA	NA	NA	NA	NA	NA	NA	70	102	88	NA	NA	1237	410	1175	345	70	101	NA	NA	NA	NA	NA	NA	NA	NA	NA	-0.226538	NA	NA	NA
Plate01	26	AAA	1	2	2	NA	YBR030W	3	46	176	3872	0.8433	16554	9098	17134	9570	3	45	183	4035	0.8332	14206	8557	14750	8989	4	46	173	3896	0.8369	16887	9353	17368	9819	4	45	169	3870	0.8613	15947	8973	16522	9490	-0.101211	-0.246017	-0.115142	-0.145604	-0.085259	-0.233403
Plate03	60	AAA	3	3	12	UFD2	YDL190C	5	122	142	3254	0.7835	20638	9113	21226	9051	5	121	156	3454	0.8895	20927	9459	21335	9267	6	122	137	3146	0.8171	20692	9311	21399	9125	6	121	151	3347	0.8285	21995	9909	22399	9733	-0.196443	-0.213951	-0.191317	-0.182984	-0.188483	-0.206892
Plate13	26	AAA	13	2	2	LPE10	YPL060W	67	94	114	2666	0.8072	22407	13499	22024	13979	67	93	118	3066	0.8172	24316	14351	24395	14811	68	94	111	2889	0.7955	17934	9155	17598	8958	68	93	168	4163	0.7838	23454	14831	24034	15234	-0.300991	-0.223617	-0.0402753	-0.284659	-0.221597	-0.180007
Plate11	236	AAA	11	10	20	NA	YNL203C	51	10	118	2365	0.7303	12504	5336	12938	5512	51	9	148	3096	0.7761	14286	5878	14621	6009	52	10	153	3467	0.752	15210	6286	15571	6386	52	9	123	2577	0.7276	13244	5532	13525	5673	-0.122322	-0.0530802	-0.0432834	-0.0928958	-0.12665	-0.052802
Plate02	116	AAA	2	5	20	NA	YBR239C	9	58	172	4030	0.8321	16860	10035	17558	10265	9	57	175	3965	0.886	15950	9340	16560	9745	10	58	168	4041	0.8515	15742	9403	16206	9638	10	57	171	3955	0.7987	16289	9497	16975	9678	-0.158657	-0.182777	-0.202376	-0.134739	-0.158785	-0.149602
Plate03	63	AAA	3	3	15	SED1	YDR077W	5	116	166	3926	0.8842	30783	17630	32076	17800	5	115	150	3726	0.8171	31812	18159	32765	18688	6	116	144	3685	0.865	31307	18336	32285	18770	6	115	149	3616	0.8762	31739	17539	33170	18100	-0.187109	-0.198524	-0.230335	-0.142643	-0.207178	-0.17863
Plate11	334	AAA	11	14	22	NA	YNL234W	59	6	186	4200	0.7965	15167	6306	15418	6441	59	5	174	3878	0.7954	14915	6314	15135	6484	60	6	195	4433	0.7992	15517	6543	15853	6687	60	5	177	3851	0.734	14570	6177	14831	6305	-0.0699598	-0.10683	-0.0812346	-0.0981496	-0.0598264	-0.0866343
Plate10	202	AAA	10	9	10	NA	YML003W	81	30	163	4069	0.8949	8686	4480	9041	4594	81	29	151	3807	0.806	8363	4742	8272	4599	82	30	178	4276	0.9053	8337	4327	8575	4304	82	29	160	3961	0.8346	8956	4536	9417	4672	-0.128471	-0.266925	-0.122367	-0.0883065	-0.146705	-0.281913
Plate13	206	AAA	13	9	14	RBL2	YOR265W	81	70	106	2562	0.854	8735	4995	8973	5231	81	69	148	3725	0.8192	17438	8955	17860	9292	82	70	115	2710	0.86	8296	4750	8755	5032	82	69	74	2115	0.8811	21404	10683	22828	11071	-0.361315	-0.0671176	-0.348321	0.0707395	-0.327368	-0.0473136
Plate14	167	AAA	14	7	23	CTF4	YPR135W	77	100	90	2243	0.865	23666	14024	25016	14630	77	99	105	2669	0.8308	24796	14643	25531	15021	78	100	98	2496	0.8727	24409	14514	25316	15290	78	99	116	2933	0.8582	25632	15094	26467	15608	-0.178116	-0.179321	-0.215617	-0.170256	-0.189935	-0.173855
Plate14	156	AAA	14	7	12	NA	YPR022C	77	122	169	4038	0.8354	20400	11802	20653	12201	77	121	169	3931	0.8056	22200	12635	22379	12455	78	122	167	3989	0.8389	20343	11742	20842	11999	78	121	175	3997	0.8446	22094	12788	22144	13317	-0.245023	-0.146003	-0.208732	-0.250212	-0.190248	-0.15094
Plate04	61	AAA	4	3	13	TOS9	YEL007W	37	24	178	4348	0.8886	21307	12259	21835	12556	37	23	176	4311	0.839	22749	12989	23446	13129	38	24	158	3963	0.8079	22565	12793	23640	13268	38	23	172	4216	0.8395	22544	12929	23302	13294	-0.168008	-0.12613	-0.128835	-0.152834	-0.162857	-0.150162
Plate11	219	AAA	11	10	3	PEX6	YNL329C	51	44	120	2420	0.7237	17663	7375	18101	7485	51	43	113	2318	0.7551	17689	7559	18172	7666	52	44	116	2315	0.773	17519	7433	18080	7600	52	43	118	2387	0.7803	17702	7502	18152	7701	-0.0476671	-0.0764393	-0.0712993	-0.0846008	-0.0567228	-0.0899637
Plate06	50	AAA	6	3	2	PBP1	YGR178C	37	94	149	3557	0.8683	16312	9481	16946	9876	37	93	139	3433	0.8276	15858	9234	16389	9802	38	94	155	3620	0.8584	15860	9370	16580	9807	38	93	142	3502	0.8619	15822	9198	16648	9711	-0.15594	-0.195998	-0.179215	-0.159499	-0.127514	-0.13347
Plate10	74	AAA	10	4	2	RIM9	YMR063W	71	46	87	2212	0.8323	6422	3361	6288	3533	71	45	51	1291	0.7623	NA	2749	NA	2972	72	46	130	3987	0.8489	11838	6529	12096	6810	72	45	83	2312	0.8427	6667	3260	6859	3390	-0.334958	NA	-0.208602	-0.145469	-0.213058	NA
Plate10	251	AAA	10	11	11	MSC1	YML128C	85	28	69	1976	0.8857	10359	5766	10421	6233	85	27	106	3066	0.9043	13120	7263	13744	7575	86	28	78	2284	0.8539	11566	6365	11986	6771	86	27	97	2721	0.8759	11454	5874	11986	6158	-0.319577	-0.154344	-0.214987	-0.0875618	-0.223532	-0.179227
Plate08	280	AAA	8	12	16	SET3	YKR029C	23	66	169	3641	0.7584	21840	9211	22374	9275	23	65	166	3589	0.7839	21588	9059	21955	9183	24	66	163	3499	0.745	21524	9026	21864	9131	24	65	163	3516	0.7236	21800	9071	22135	9175	-0.0839358	-0.100556	-0.0996193	-0.0865798	-0.0977538	-0.0946445
Plate11	204	AAA	11	9	12	NA	YMR294W-A	49	26	190	4393	0.7109	18246	7712	18468	7840	49	25	175	4209	0.7296	18588	7839	18933	8020	50	26	153	3317	0.7692	17188	7285	17570	7449	50	25	169	3839	0.7676	17839	7568	18212	7669	-0.0856071	-0.082855	-0.0838807	-0.0738322	-0.0740482	-0.0709393
Plate14	154	AAA	14	7	10	EAF3	YPR023C	77	126	103	2737	0.8403	34462	22584	36095	23381	77	125	103	2799	0.8594	34156	22366	35736	23120	78	126	118	3133	0.8611	37012	23676	38391	25132	78	125	124	3206	0.8092	37108	24275	38445	25488	-0.148636	-0.152584	-0.126403	-0.140194	-0.196556	-0.199331
Plate09	281	AAA	9	12	17	CCW14	YLR390W-A	23	112	175	3783	0.8182	27030	10705	27470	10837	23	111	195	4133	0.7465	27188	11085	27914	11218	24	112	187	4207	0.7603	27741	11378	28380	11578	24	111	176	3854	0.7635	27274	11196	27700	11222	-0.0668734	-0.0891952	-0.106835	-0.101441	-0.0541853	-0.0926164
Plate14	226	AAA	14	10	10	RXT2	YBR095C	83	126	117	2614	0.8394	12167	6733	12595	6631	83	125	105	2441	0.8328	12785	6808	12798	6692	84	126	120	2776	0.8788	12810	6842	12867	6903	84	125	108	2464	0.8691	12211	6560	12679	6469	-0.196365	-0.183882	-0.217111	-0.152983	-0.212776	-0.152791
Plate14	286	AAA	14	12	22	LYS2	YBR115C	87	102	126	3073	0.8435	14804	7952	15401	8307	87	101	150	3868	0.8687	17847	9842	17481	10168	88	102	144	3544	0.8439	15837	8899	16084	9393	88	101	135	3260	0.855	14711	8280	15056	8586	-0.186981	-0.261722	-0.284403	-0.26625	-0.142663	-0.149078
Plate02	86	AAA	2	4	14	TRX3	YCR083W	7	70	180	4217	0.8105	21648	13554	22125	13989	7	69	182	4129	0.8195	22569	13716	23318	14350	8	70	180	4252	0.8815	22221	13829	22497	14348	8	69	182	4282	0.8182	21766	13479	22348	13942	-0.199158	-0.149556	-0.205958	-0.178929	-0.16929	-0.120156
Plate03	148	AAA	3	7	4	BRE4	YDL231C	13	138	127	3002	0.8482	21576	9290	22848	9810	13	137	125	2969	0.8187	19800	8692	21000	8980	14	138	134	3111	0.8433	19383	8550	20257	8872	14	137	132	3124	0.8149	21127	9161	22141	9323	-0.15664	-0.206399	-0.256011	-0.155323	-0.133053	-0.20611
Plate06	55	AAA	6	3	7	LAG1	YHL003C	37	84	145	3304	0.8592	7532	3965	7551	3938	37	83	133	3125	0.7887	7094	3744	7350	3792	38	84	136	3250	0.8333	6376	3355	6517	3311	38	83	130	3158	0.8613	7603	4088	7720	4111	-0.145674	-0.137869	-0.148153	-0.168122	-0.115071	-0.131592
Plate13	347	AAA	13	15	11	EGD1	YPL037C	93	76	135	3157	0.8525	17754	10059	18763	10400	93	75	115	2696	0.8289	18733	10310	19682	10434	94	76	157	3506	0.8829	18447	11006	19582	11447	94	75	98	2308	0.7801	17148	9258	18189	9741	-0.144104	-0.0753771	-0.208858	-0.102994	-0.17741	-0.128794
Plate02	234	AAA	2	10	18	NA	YDL025C	19	62	190	4573	0.8778	16242	9571	16642	9295	19	61	201	4624	0.8722	16276	9515	16854	9445	20	62	189	4491	0.8471	16570	9776	17011	9518	20	61	203	4623	0.8478	15935	9287	16490	9380	-0.11309	-0.114099	-0.109569	-0.13947	-0.153877	-0.14282
Plate01	35	AAA	1	2	11	CCZ1	YBR131W	3	28	135	3198	0.8306	10282	5465	10602	5432	3	27	141	3224	0.8793	11858	6541	12493	6785	4	28	136	3098	0.8822	7963	4144	8409	4337	4	27	133	3010	0.8392	8749	4628	9194	4909	-0.0695339	-0.119084	-0.12137	-0.151419	-0.10695	-0.137847
Plate06	114	AAA	6	5	18	QCR9	YGR183C	41	62	129	3331	0.8258	32893	20650	34965	21867	41	61	130	3297	0.8582	33160	20468	35336	21642	42	62	122	3210	0.8337	32626	19682	34230	20737	42	61	132	3412	0.8559	33576	21006	35448	22072	-0.157923	-0.127759	-0.117398	-0.149921	-0.154904	-0.130513
Plate01	99	AAA	1	5	3	SAS3	YBL052C	9	44	167	3986	0.8681	17696	10029	17536	10267	9	43	160	3666	0.8257	17403	10233	17014	10229	10	44	157	3848	0.821	18148	10338	18062	10597	10	43	175	3941	0.8771	17504	9616	17589	10099	-0.16069	-0.202023	-0.158104	-0.133761	-0.116888	-0.169756
Plate01	350	AAA	1	15	14	SLA1	YBL007C	29	22	73	1833	0.9061	22699	13926	22924	14315	29	21	110	3037	0.8601	29210	16947	29234	17261	30	22	63	1693	0.7838	23337	14222	23574	14736	30	21	112	2977	0.8984	27920	16243	27539	16709	-0.196771	-0.0720344	-0.192577	-0.120926	-0.182333	-0.0584381
Plate04	279	AAA	4	12	15	YOD1	YFL044C	55	20	169	4457	0.8929	17073	9700	17607	9759	55	19	176	4390	0.8606	17478	9949	18183	10195	56	20	170	4459	0.8874	17345	9795	18077	9592	56	19	178	4418	0.8893	16939	9585	17710	9759	-0.127504	-0.142199	-0.0643697	-0.118943	-0.150157	-0.152332
Plate04	60	AAA	4	3	12	CYM1	YDR430C	37	26	185	4569	0.8283	18987	10612	19706	10640	37	25	184	4668	0.8247	18712	10677	19103	10672	38	26	177	4278	0.8651	17660	9972	18314	10267	38	25	167	4241	0.8153	17293	9939	17797	10260	-0.0845592	-0.134473	-0.141628	-0.182713	-0.124176	-0.154135
Plate07	218	AAA	7	10	2	NA	YJL169W	51	142	139	3481	0.7891	20478	10830	20375	11311	51	141	135	3428	0.8763	20183	10778	20264	11155	52	142	141	3536	0.8265	20025	10627	20257	11118	52	141	133	3387	0.862	19503	10394	19462	10753	-0.203408	-0.19518	-0.191629	-0.216067	-0.104078	-0.121448
Plate07	222	AAA	7	10	6	HAL5	YJL165C	51	134	114	2595	0.8907	13677	6584	14399	6704	51	133	116	2566	0.8289	13687	6628	14598	6787	52	134	122	2731	0.8434	14002	6708	14531	6896	52	133	111	2448	0.8381	13674	6535	14498	6615	-0.122326	-0.115187	-0.142593	-0.0944326	-0.122066	-0.129379
Plate03	53	AAA	3	3	5	NA	YDR089W	5	136	134	3070	0.8598	21420	9581	22668	9388	5	135	122	2964	0.8128	21830	9819	22880	9831	6	136	137	3212	0.8857	21978	9822	22664	9850	6	135	129	3037	0.8393	21312	9420	22470	9349	-0.121555	-0.156543	-0.175495	-0.132398	-0.180883	-0.17566
Plate13	338	AAA	13	15	2	RPL20B	YOR312C	93	94	98	2485	0.7698	23201	13679	24464	14227	93	93	114	2941	0.7144	23395	14049	25007	14669	94	94	125	3172	0.775	26848	16437	28781	17167	94	93	80	2096	0.8311	26088	13945	26551	14887	-0.164596	-0.172723	-0.172601	-0.101435	-0.186456	-0.210024
Plate10	140	AAA	10	6	20	UBX4	YMR067C	75	10	134	3474	0.8741	9342	4654	9452	4673	75	9	56	1491	0.8196	NA	2810	NA	2894	76	10	69	1729	0.8573	10097	5531	10213	5970	76	9	126	3269	0.8732	11106	6128	10707	5704	-0.0828765	NA	-0.292725	-0.158656	-0.0880807	NA
Plate11	335	AAA	11	14	23	NA	YNR005C	59	4	171	3788	0.7671	14888	6317	14983	6433	59	3	166	3743	0.7878	14731	6207	14845	6222	60	4	180	3997	0.7298	15443	6397	15693	6444	60	3	164	3597	0.7913	14767	6150	15136	6309	-0.110863	-0.0783533	-0.0443335	-0.0685916	-0.090005	-0.0815312
Plate14	36	AAA	14	2	12	NA	YGR068C	67	122	138	3309	0.9267	20311	11503	21451	12046	67	121	133	2981	0.8872	17691	9948	18282	9845	68	122	118	2899	0.8799	18518	10151	18922	10558	68	121	135	3206	0.8772	18972	10859	19305	10787	-0.168723	-0.149209	-0.189474	-0.187021	-0.162431	-0.177041
Plate09	190	AAA	9	8	22	NA	YLR252W	15	102	181	4046	0.7579	26572	10631	27051	10616	15	101	154	3369	0.7561	24060	9607	24579	9607	16	102	159	3533	0.7969	25253	10232	25740	10333	16	101	178	3935	0.7095	25704	10268	26086	10257	-0.062543	-0.0755706	-0.102358	-0.0718766	-0.0709381	-0.0870366
Plate08	284	AAA	8	12	20	FMP50	YKR027W	23	58	178	4065	0.825	23997	10132	24358	10176	23	57	198	4274	0.7894	23428	10087	23523	10182	24	58	179	4194	0.7706	24298	10474	24352	10394	24	57	189	4327	0.7861	24566	10531	24553	10378	-0.0716591	-0.127476	-0.0996789	-0.0846699	-0.0706782	-0.103315
Plate11	83	AAA	11	4	11	WSC2	YNL283C	39	28	207	4883	0.7979	16964	7082	17123	7179	39	27	221	5130	0.7854	16933	7159	17143	7282	40	28	220	5441	0.7902	17562	7452	17628	7561	40	27	229	5611	0.8077	18634	7880	18732	7914	-0.0685625	-0.0871921	-0.100525	-0.0788326	-0.0576448	-0.0757145
Plate03	37	AAA	3	2	13	SUM1	YDR310C	3	120	106	2622	0.7723	33808	19969	34782	21377	3	119	101	2655	0.7979	37479	24314	38777	25027	4	120	102	2687	0.8598	34818	20962	35912	21844	4	119	113	2883	0.8532	37524	24248	38873	25546	-0.226	-0.181083	-0.188348	-0.196834	-0.167195	-0.17972
Plate10	296	AAA	10	13	8	NA	YML030W	89	34	130	3418	0.8448	12005	6519	12126	6660	89	33	116	3163	0.9181	12163	6753	12701	6891	90	34	118	3131	0.8996	12091	6425	12845	6726	90	33	104	2920	0.8833	11918	6412	12269	6608	-0.174879	-0.149164	-0.0992371	-0.146267	-0.166862	-0.195098
Plate11	339	AAA	11	15	3	NRK1	YNL129W	61	44	158	3477	0.7822	24067	9996	24477	10123	61	43	134	2800	0.7632	20537	8909	21042	8932	62	44	125	2501	0.7006	21794	9053	21740	9053	62	43	180	3865	0.7291	23488	9648	24028	9864	-0.0682233	-0.0910983	-0.0652768	-0.0545742	-0.067098	-0.116306
Plate14	257	AAA	14	11	17	HDA3	YPR179C	85	112	85	2124	0.7693	18784	10408	19285	10661	85	111	92	2307	0.868	18966	10649	19541	10755	86	112	101	2431	0.8597	19198	10870	20034	11075	86	111	95	2264	0.8788	18677	10563	19377	10834	-0.172964	-0.164193	-0.164423	-0.187033	-0.147042	-0.163359
Plate02	231	AAA	2	10	15	NA	YDL144C	19	68	184	4400	0.8485	20038	12133	20700	12084	19	67	168	4046	0.8625	19452	11450	20454	11597	20	68	179	4207	0.867	19088	11514	19824	11401	20	67	192	4583	0.8701	19706	12080	20289	12335	-0.112752	-0.0777802	-0.104762	-0.171276	-0.142516	-0.111726
Plate10	214	AAA	10	9	22	NA	YLR455W	81	6	94	2217	0.8777	7361	3325	7785	3503	81	5	145	3927	0.8453	6016	3652	5654	3672	82	6	131	3205	0.8721	7013	3336	7268	3427	82	5	151	3596	0.8589	7493	3842	7540	3814	0.00554922	-0.550583	-0.0708325	-0.158074	0.00897308	-0.425714
Plate13	85	AAA	13	4	13	CBC2	YPL178W	71	72	NA	NA	NA	NA	NA	NA	NA	71	71	NA	NA	NA	NA	NA	NA	NA	72	72	86	NA	NA	887	163	875	142	72	71	67	NA	NA	832	188	801	174	NA	NA	0.0196707	-0.351606	NA	NA
Plate09	76	AAA	9	4	4	EST1	YLR233C	7	138	209	4585	0.7713	25086	9999	25263	10120	7	137	206	4596	0.8382	25419	10141	25581	10185	8	138	210	4840	0.7796	25570	10186	25688	10308	8	137	198	4472	0.7386	25077	10172	25353	10270	-0.103125	-0.0924659	-0.102205	-0.117435	-0.0764899	-0.0752077
Plate01	47	AAA	1	2	23	MRPL36	YBR122C	3	4	176	3774	0.7936	10267	5490	10582	5733	3	3	177	3722	0.8307	10192	5553	10728	5715	4	4	176	3862	0.8008	9790	5217	10149	5215	4	3	178	3870	0.8273	9857	5137	10325	5303	-0.145348	-0.120087	-0.0814141	-0.0776519	-0.115418	-0.142164
Plate04	319	AAA	4	14	7	GCN20	YFR009W	59	36	126	3282	0.8562	14818	8333	15317	8682	59	35	110	2844	0.8783	14090	7883	14664	8248	60	36	108	2830	0.8491	13706	7682	14442	8047	60	35	128	3124	0.8269	13707	7797	14396	8245	-0.166054	-0.157195	-0.14454	-0.183719	-0.138794	-0.132656
Plate11	307	AAA	11	13	19	OCA1	YNL099C	57	12	160	3561	0.7578	16156	7062	16345	7088	57	11	176	4092	0.7891	17259	6959	17709	7051	58	12	170	3811	0.7817	16506	6903	16894	7015	58	11	176	3992	0.8338	16508	7031	16900	7235	-0.118465	0.00618147	-0.0553505	-0.0987757	-0.125185	-0.00750099
Plate14	71	AAA	14	3	23	NA	YPR096C	69	100	175	4133	0.8461	17340	9646	17518	9833	69	99	173	3976	0.785	16103	8811	16569	8890	70	100	173	4081	0.8297	15948	8798	16232	9023	70	99	160	3886	0.7822	18160	10094	18343	10349	-0.213608	-0.164768	-0.216428	-0.210873	-0.165612	-0.154867
Plate07	92	AAA	7	4	20	ASF1	YJL115W	39	106	109	2891	0.8889	25948	15107	26171	15290	39	105	80	2073	0.853	25090	13978	25379	14252	40	106	86	2243	0.8386	23011	12788	24072	13161	40	105	85	2074	0.8405	24608	13582	25365	13816	-0.163018	-0.12715	-0.116129	-0.0897304	-0.140839	-0.09758
Plate01	100	AAA	1	5	4	SNC1	YAL030W	9	42	151	3269	0.8639	12212	6717	12804	6973	9	41	156	3541	0.8414	12456	6676	13174	6988	10	42	154	3393	0.8711	13001	7093	13739	7413	10	41	148	3391	0.8826	13095	7222	13744	7715	-0.118491	-0.0778166	-0.0935907	-0.147148	-0.129882	-0.091576
Plate11	165	AAA	11	7	21	NA	YNL056W	45	8	209	5168	0.8186	17948	7544	18059	7647	45	7	204	4895	0.8079	17716	7463	17833	7538	46	8	193	4792	0.8159	17780	7493	17928	7585	46	7	180	4333	0.7311	17774	7511	18049	7550	-0.0818631	-0.0794011	-0.0806558	-0.0642723	-0.0660716	-0.0693928
Plate01	65	AAA	1	3	17	HAP3	YBL021C	5	16	113	3023	0.8589	31178	19925	31484	20592	5	15	129	3516	0.8397	31164	18995	31991	20074	6	16	143	3632	0.8977	29998	17849	31512	19181	6	15	111	3039	0.8232	28748	16896	29260	17564	-0.193065	-0.13428	-0.0968686	-0.0939399	-0.174472	-0.11122
Plate10	81	AAA	10	4	9	NA	YMR166C	71	32	81	2081	0.778	6873	3412	7033	3507	71	31	67	1714	0.8755	7450	3513	7541	3710	72	32	118	2897	0.8614	6908	3731	7245	3810	72	31	116	2940	0.8486	8035	4291	8439	4460	-0.1525	-0.120703	-0.218169	-0.194867	-0.130524	-0.0478867
Plate02	140	AAA	2	6	20	KIN82	YCR091W	11	58	142	3579	0.8592	24388	15974	24254	16735	11	57	148	3747	0.7884	24966	15891	24784	16186	12	58	143	3740	0.8324	27573	16287	27107	16662	12	57	141	3566	0.8431	25578	16290	25126	16859	-0.28794	-0.210264	-0.106157	-0.24166	-0.201301	-0.157833
Plate08	184	AAA	8	8	16	VPS1	YKR001C	15	66	55	939	0.7566	NA	6675	NA	6762	15	65	99	1938	0.7509	21347	8746	21723	9010	16	66	96	1989	0.7948	21700	8959	22154	9128	16	65	81	1568	0.7499	19325	8016	20141	8256	NA	-0.0922446	-0.0784837	-0.0957857	NA	-0.0668577
Plate01	27	AAA	1	2	3	HDR1	YBR138C	3	44	161	3733	0.7678	16064	8916	16392	9413	3	43	164	3693	0.8418	15188	8484	15793	8674	4	44	160	3804	0.8077	16609	9256	16706	9673	4	43	168	3775	0.863	15059	8392	15398	8595	-0.146688	-0.0930742	-0.154467	-0.119488	-0.103245	-0.120347
Plate13	267	AAA	13	12	3	NA	YPL245W	87	92	91	2441	0.8379	23438	14813	23512	15239	87	91	148	3620	0.8335	21223	12789	21137	12658	88	92	111	3010	0.866	26381	14301	26347	14270	88	91	118	3234	0.8355	28408	15457	28279	15466	-0.318597	-0.228796	-0.0556038	-0.0572663	-0.2792	-0.231011
Plate07	179	AAA	7	8	11	POL32	YJR043C	47	124	120	2970	0.8553	19217	9972	19985	10495	47	123	129	3276	0.8501	19586	10281	20447	10633	48	124	125	3123	0.8611	19103	9961	19989	10447	48	123	124	3150	0.881	19127	10049	20161	10569	-0.142322	-0.120948	-0.136304	-0.136623	-0.102096	-0.110103
Plate14	99	AAA	14	5	3	MSS18	YPR134W	73	140	141	3395	0.8952	32948	20262	34302	20365	73	139	141	3449	0.8705	33246	20888	34520	20964	74	140	141	3488	0.8356	34004	21488	34837	21737	74	139	136	3323	0.8742	34024	21697	35548	22302	-0.071729	-0.0956636	-0.123226	-0.119191	-0.135879	-0.159057
Plate10	39	AAA	10	2	15	NA	YMR153C-A	67	20	161	4017	0.8397	9443	4431	9575	4419	67	19	146	3691	0.7922	9944	5183	9690	5304	68	20	175	4537	0.8526	9957	5388	9417	5142	68	19	121	NA	NA	707	255	693	222	0.0121751	-0.214794	-0.217149	-0.237612	-0.00468886	-0.140158
Plate13	60	AAA	13	3	12	SAS5	YOR213C	69	74	113	NA	NA	900	220	877	201	69	73	175	4184	0.8622	13206	6730	13645	7051	70	74	178	4370	0.8528	14370	7523	14848	7603	70	73	119	2736	0.8755	10651	5274	11241	5487	-0.331271	-0.109201	-0.0802234	-0.0739782	-0.305157	-0.0881575
Plate14	327	AAA	14	14	15	NA	YPL158C	91	116	138	3160	0.8113	18879	10658	19434	11224	91	115	112	2937	0.8505	22234	12493	22616	12488	92	116	124	2965	0.8684	18317	10075	19180	10655	92	115	131	3163	0.8277	19449	10981	20207	11560	-0.229524	-0.132886	-0.180683	-0.207799	-0.171537	-0.133485
Plate12	219	AAA	12	10	3	SEY1	YOR165W	51	92	140	3070	0.8381	21456	8752	21569	8796	51	91	107	2461	0.7969	18926	8092	18877	8189	52	92	126	2655	0.8505	19281	8161	19485	8220	52	91	147	3179	0.8382	20844	8673	21111	8819	-0.0337492	-0.145738	-0.101989	-0.0708811	-0.0324393	-0.120447
Plate14	86	AAA	14	4	14	GEM1	YAL048C	71	118	140	3308	0.8722	22032	12532	22956	12687	71	117	143	3264	0.8451	21627	12429	22545	12682	72	118	151	3484	0.8906	22218	12448	23322	12875	72	117	157	3520	0.8838	21948	12548	22616	12671	-0.130046	-0.158031	-0.124217	-0.151938	-0.151794	-0.169483
Plate11	238	AAA	11	10	22	SPS19	YNL202W	51	6	200	4578	0.7631	15069	6301	15352	6397	51	5	205	4579	0.749	15822	6666	15977	6798	52	6	202	4697	0.8314	15130	6214	15415	6291	52	5	201	4655	0.8288	15426	6514	15674	6660	-0.0667692	-0.0928932	-0.0373537	-0.0923614	-0.0684086	-0.0745791
Plate10	186	AAA	10	8	18	VBA1	YMR088C	79	14	NA	NA	NA	NA	NA	NA	NA	79	13	NA	NA	NA	NA	NA	NA	NA	80	14	112	NA	NA	674	211	639	168	80	13	NA	NA	NA	NA	NA	NA	NA	NA	NA	-0.0729975	NA	NA	NA
Plate11	310	AAA	11	13	22	NA	YMR315W	57	6	184	4186	0.8005	15805	6543	16184	6646	57	5	178	3948	0.7531	15511	6514	15918	6660	58	6	183	4001	0.7746	15695	6616	16041	6755	58	5	180	3847	0.795	15132	6325	15596	6463	-0.0420284	-0.0694928	-0.0780495	-0.057665	-0.0500356	-0.0717019
Plate04	206	AAA	4	9	14	VPS60	YDR486C	49	22	121	3478	0.8863	22580	12828	22636	12923	49	21	97	2738	0.8919	18381	10000	19052	10402	50	22	125	3551	0.8281	21518	12029	21939	12433	50	21	91	2647	0.8262	19077	11074	19377	11343	-0.155635	-0.102106	-0.1471	-0.19989	-0.143205	-0.0863734
Plate08	202	AAA	8	9	10	MET14	YKL001C	17	78	150	2954	0.7066	20960	8614	21723	8977	17	77	153	2963	0.7662	20645	8490	21592	8832	18	78	142	2831	0.7704	20849	8637	21634	8968	18	77	137	2705	0.7834	20407	8334	21162	8531	-0.0874196	-0.0754977	-0.0925473	-0.061422	-0.0761308	-0.0812882
Plate01	45	AAA	1	2	21	PTC4	YBR125C	3	8	136	3276	0.8392	18220	10126	18863	10610	3	7	163	3978	0.806	17030	9496	17404	9607	4	8	165	4097	0.8546	18036	10167	18508	10691	4	7	154	3878	0.8504	17360	9955	18170	10321	-0.0931654	-0.082458	-0.132598	-0.113301	-0.0856069	-0.100683
Plate11	166	AAA	11	7	22	SCS7	YMR272C	45	6	130	2740	0.8602	12880	5316	13246	5400	45	5	138	2903	0.8005	13080	5390	13400	5546	46	6	112	2425	0.7833	12541	4983	12972	5122	46	5	90	1932	0.7823	11329	4594	11474	4726	-0.0584603	-0.0765449	-0.0202724	-0.107914	-0.0756587	-0.0703102
Plate09	160	AAA	9	7	16	BRE2	YLR015W	13	114	106	2076	0.6673	20938	8091	21671	8218	13	113	90	1718	0.6833	19834	7700	20791	7915	14	114	103	2128	0.7205	21283	8227	21833	8275	14	113	100	2048	0.6934	21435	8284	21965	8394	-0.0618644	-0.0765332	-0.0594812	-0.0691246	-0.0726319	-0.0913882
Plate12	126	AAA	12	6	6	BUB3	YOR026W	43	86	107	2041	0.727	13940	5557	13759	5550	43	85	105	2091	0.7635	13975	5530	14039	5604	44	86	85	1691	0.6277	14044	5506	13930	5662	44	85	90	1551	0.7634	12591	5109	12287	5263	-0.0996702	-0.0814602	-0.107303	-0.205353	-0.0755427	-0.0651465
Plate03	300	AAA	3	13	12	RPS11A	YDR025W	25	122	110	2818	0.8089	23011	10770	24195	11159	25	121	105	2653	0.8132	23847	11029	24932	11475	26	122	107	2883	0.8012	24216	11149	25308	11656	26	121	103	2580	0.8264	23532	10729	24697	11048	-0.19743	-0.174539	-0.164924	-0.149778	-0.187711	-0.15158
Plate01	123	AAA	1	6	3	SSE2	YBR169C	11	44	170	4009	0.8447	17950	10153	18132	10545	11	43	165	3863	0.8736	18545	10422	18671	10736	12	44	169	3948	0.8457	18544	10438	18876	10664	12	43	168	3800	0.8576	18356	10420	18612	10709	-0.145523	-0.124812	-0.0989636	-0.126269	-0.111961	-0.0979521
Plate04	130	AAA	4	6	10	RPS24A	YER074W	43	30	125	3460	0.8163	25346	14296	26416	15261	43	29	90	2703	0.7935	23262	13143	24169	14157	44	30	117	3239	0.8822	25116	14433	25965	15474	44	29	119	3393	0.842	25285	13926	26523	14715	-0.162016	-0.187612	-0.206976	-0.104768	-0.129504	-0.134508
Plate01	246	AAA	1	11	6	PAU7	YAR020C	21	38	197	4488	0.805	20133	11511	20827	11784	21	37	208	4649	0.8948	18615	10467	19353	10776	22	38	195	4440	0.8601	19653	11193	20222	11634	22	37	194	4455	0.8512	20056	11447	20722	11911	-0.0826513	-0.0747598	-0.110685	-0.104872	-0.107919	-0.0980837
Plate11	130	AAA	11	6	10	NA	YNL176C	43	30	212	5037	0.8175	19319	8101	19574	8296	43	29	207	4853	0.7384	19010	7945	19250	8161	44	30	213	5084	0.7489	19102	8051	19413	8232	44	29	226	5663	0.6875	19790	8301	19939	8458	-0.084665	-0.0844951	-0.0851103	-0.0867389	-0.0634706	-0.0582237
Plate10	60	AAA	10	3	12	NA	YLR422W	69	26	198	4957	0.856	9458	4526	9864	4534	69	25	190	4811	0.8699	9264	4405	9660	4396	70	26	122	NA	NA	673	233	662	214	70	25	96	NA	NA	651	221	636	184	0.0234699	0.0328106	-0.276886	-0.180685	-0.031243	-0.0257393
Plate03	75	AAA	3	4	3	MSN5	YDR335W	7	140	106	2673	0.9018	19805	8383	20400	8612	7	139	86	2248	0.8646	19057	8068	20229	8342	8	140	112	2778	0.8274	20757	8698	21542	8980	8	139	107	2763	0.8495	20662	8693	21384	8911	-0.210018	-0.188647	-0.161572	-0.165841	-0.163917	-0.186103
Plate13	45	AAA	13	2	21	PET20	YPL159C	67	56	146	3274	0.8325	10857	5688	11125	5915	67	55	140	3213	0.8459	13517	7201	14298	7670	68	56	140	3417	0.8021	13804	7157	14195	7415	68	55	157	3809	0.8453	13923	7496	14273	7362	-0.190157	-0.150155	-0.115828	-0.0977402	-0.164296	-0.143438
Plate12	77	AAA	12	4	5	NA	YOR111W	39	88	NA	NA	NA	NA	NA	NA	NA	39	87	NA	NA	NA	NA	NA	NA	NA	40	88	187	NA	NA	4571	1015	4509	946	40	87	NA	NA	NA	NA	NA	NA	NA	NA	NA	-0.06626	NA	NA	NA
Plate04	208	AAA	4	9	16	VPS72	YDR485C	49	18	121	2970	0.8525	13619	7762	14014	7903	49	17	110	2737	0.824	13685	7632	14585	7777	50	18	116	2755	0.8107	12936	7086	13688	7225	50	17	119	2835	0.8596	13127	7231	14091	7423	-0.163018	-0.0816538	-0.0702499	-0.0660804	-0.159982	-0.128788
Plate11	250	AAA	11	11	10	GAS1	YMR307W	53	30	175	3889	0.7674	18719	7861	19170	8045	53	29	180	4128	0.7716	18699	7848	18999	7895	54	30	184	4100	0.7825	19447	8111	19736	8355	54	29	168	3807	0.8106	19050	8010	19596	8209	-0.0695856	-0.0550468	-0.0833118	-0.0676563	-0.0649138	-0.0640494
Plate02	56	AAA	2	3	8	SWC5	YBR231C	5	82	75	1864	0.8152	28212	17808	30047	18356	5	81	138	3164	0.8444	29345	18139	31374	18780	6	82	89	2203	0.8258	27291	17387	28943	18479	6	81	91	2164	0.8186	25957	16720	27098	17716	-0.0686191	-0.0295575	-0.136721	-0.186446	-0.117244	-0.0798871
Plate02	85	AAA	2	4	13	NA	YDL099W	7	72	182	4238	0.8474	26050	16152	26701	16450	7	71	171	4029	0.8672	25909	16015	26537	16335	8	72	173	4102	0.8602	25031	15353	25661	15823	8	71	175	4030	0.8899	23614	14986	24250	15578	-0.113404	-0.114033	-0.125691	-0.194769	-0.112989	-0.110203
Plate07	239	AAA	7	10	23	OSM1	YJR051W	51	100	189	4312	0.8067	24741	13951	25130	14569	51	99	187	4461	0.7813	25183	14202	25517	14806	52	100	184	4382	0.8411	25279	14058	26112	14850	52	99	183	4409	0.8101	25709	14289	26439	14599	-0.170571	-0.165214	-0.130773	-0.089193	-0.117889	-0.11162
Plate04	31	AAA	4	2	7	BEM2	YER155C	35	36	128	3275	0.8788	13249	7311	13535	7489	35	35	142	3461	0.7424	13050	7141	13335	7271	36	36	147	3623	0.7973	12758	7074	13274	7189	36	35	137	3314	0.8561	12438	7080	12771	7214	-0.137668	-0.117559	-0.108181	-0.169741	-0.114463	-0.102841
Plate08	268	AAA	8	12	4	NA	YKR035C	23	90	157	3335	0.8533	26515	11609	27296	11608	23	89	147	3093	0.7584	26662	11494	27526	11639	24	90	162	3427	0.8027	26560	11543	27144	11758	24	89	116	2543	0.8214	26669	11694	27850	11823	-0.0609285	-0.050884	-0.0863385	-0.0521253	-0.0836849	-0.0621311
Plate13	79	AAA	13	4	7	CTI6	YPL181W	71	84	135	3242	0.8556	11179	5867	11796	6224	71	83	154	3569	0.8445	11348	6392	11956	6624	72	84	78	2211	0.8977	13639	6578	13441	6781	72	83	72	1966	0.8058	14166	7539	14389	7720	-0.167242	-0.22965	-0.0800789	-0.149125	-0.160638	-0.252432
Plate03	106	AAA	3	5	10	NA	YDL211C	9	126	163	4157	0.817	26710	13268	27544	13872	9	125	171	4130	0.8385	27454	13761	28339	14307	10	126	166	4108	0.8698	26894	13278	27855	13876	10	125	165	4086	0.8552	27340	13652	27919	14132	-0.201317	-0.182836	-0.181295	-0.196753	-0.155638	-0.14648
Plate09	263	AAA	9	11	23	NA	YLR149C	21	100	212	4648	0.789	26654	10794	26853	10787	21	99	215	4823	0.7842	27104	11111	27405	11249	22	100	188	4259	0.7817	26966	10584	27192	10571	22	99	200	4318	0.7077	27608	10966	27786	10981	-0.0954164	-0.12107	-0.0488283	-0.0672568	-0.0868388	-0.100524
Plate03	50	AAA	3	3	2	NA	YDL199C	5	142	142	3197	0.7985	21548	9191	22418	9308	5	141	134	3105	0.8581	21399	9224	22293	9445	6	142	146	3327	0.8121	21177	9048	22005	9062	6	141	136	3033	0.8589	20047	8753	21048	8939	-0.13157	-0.1578	-0.134338	-0.197227	-0.123087	-0.139277
Plate01	183	AAA	1	8	15	SWD3	YBR175W	15	20	117	2861	0.8332	13196	7175	13272	7509	15	19	109	2720	0.8611	12910	6984	13096	7267	16	20	115	2785	0.8376	13271	7095	13585	7287	16	19	126	2959	0.8493	12855	7054	13353	7527	-0.163942	-0.139966	-0.0876028	-0.157878	-0.103408	-0.0994658
Plate07	41	AAA	7	2	17	NA	YJL207C	35	112	158	3646	0.8217	23362	12373	24719	12725	35	111	159	3716	0.7426	23272	12372	24178	12691	36	112	176	3982	0.8334	22463	12639	23159	12955	36	111	171	4029	0.8331	23062	12841	23611	13440	-0.0307472	-0.0639498	-0.160419	-0.17395	-0.0593506	-0.0655059
Plate01	227	AAA	1	10	11	RPS9B	YBR189W	19	28	73	2012	0.8746	15648	8823	15754	8796	19	27	70	2078	0.9096	16639	9228	17441	9339	20	28	78	2194	0.8791	17557	9823	17398	9956	20	27	63	1789	0.7979	15656	8487	15882	8428	-0.115768	-0.0409418	-0.131227	-0.0455223	-0.128725	-0.0968721
Plate04	74	AAA	4	4	2	NA	YER066W	39	46	141	3162	0.8382	8799	4863	9385	5025	39	45	133	3075	0.8322	9015	5103	9475	5390	40	46	130	3104	0.8141	9395	4967	9846	5101	40	45	129	3041	0.8536	9347	5191	9658	5379	-0.110065	-0.194956	-0.0605507	-0.163894	-0.130766	-0.163381
Plate02	198	AAA	2	9	6	DPB3	YBR278W	17	86	131	3173	0.8846	36196	24140	37709	25345	17	85	135	3261	0.8336	36026	23707	37176	24877	18	86	137	3432	0.8643	34382	21207	34855	22169	18	85	132	3222	0.8324	36403	26163	37988	27731	-0.120852	-0.119878	-0.0755402	-0.223971	-0.124077	-0.107912
Plate12	188	AAA	12	8	20	DFG16	YOR030W	47	58	60	1192	0.6969	NA	5110	NA	5450	47	57	78	1605	0.7876	14339	6120	14294	6257	48	58	116	2386	0.7548	16883	6465	17494	6579	48	57	71	1114	0.7338	NA	4667	NA	4771	NA	-0.202114	0.0368928	NA	NA	-0.161743
Plate07	220	AAA	7	10	4	SET2	YJL168C	51	138	97	2387	0.8295	17607	9020	18337	9438	51	137	98	2562	0.8848	18023	9190	18979	9594	52	138	115	2756	0.8653	18295	9311	18969	9862	52	137	116	2848	0.8963	18695	9507	19824	9939	-0.151863	-0.115738	-0.150844	-0.0880567	-0.115829	-0.101906
Plate04	220	AAA	4	10	4	SWI4	YER111C	51	42	172	4297	0.8512	10680	5904	11030	6062	51	41	169	4280	0.8375	10740	5932	11036	6029	52	42	177	4283	0.8491	10597	5872	10870	6088	52	41	170	4312	0.8486	10801	5943	11059	6087	-0.137838	-0.1293	-0.165349	-0.139822	-0.122921	-0.121508
Plate11	358	AAA	11	15	22	PET8	YNL003C	61	6	164	3642	0.8285	15947	6632	16327	6750	61	5	170	3613	0.8395	15910	6667	16268	6842	62	6	180	3901	0.8479	16479	6848	16878	6961	62	5	171	3666	0.7694	16292	6840	16564	6990	-0.0509387	-0.0753917	-0.0457596	-0.0791921	-0.0557455	-0.0665816
Plate06	154	AAA	6	7	10	NA	YGR205W	45	78	154	4002	0.8837	20545	11994	21063	12638	45	77	172	4288	0.8854	21107	12403	21793	12971	46	78	150	3808	0.883	19593	11500	20361	12023	46	77	164	4265	0.8097	21191	12303	21797	12718	-0.168542	-0.153144	-0.150699	-0.125684	-0.107052	-0.11312
Plate01	101	AAA	1	5	5	PIN4	YBL051C	9	40	96	2343	0.9095	16227	8887	17044	9351	9	39	138	3127	0.829	16855	9179	17573	9714	10	40	106	2553	0.7922	16175	8991	17014	9349	10	39	114	2624	0.8961	16091	9147	16922	9772	-0.0779708	-0.0826131	-0.0803814	-0.148546	-0.0834656	-0.0700056
Plate13	311	AAA	13	13	23	NA	YPL009C	89	52	109	2624	0.8563	12093	6833	12500	6988	89	51	127	3227	0.7942	12303	7532	12581	7971	90	52	127	3176	0.8374	16636	8166	17086	8466	90	51	125	3191	0.8369	15983	7554	16338	7612	-0.232505	-0.399086	-0.00926602	0.0653763	-0.244136	-0.348749
Plate10	219	AAA	10	10	3	NA	YMR206W	83	44	195	4601	0.7828	7507	3820	7718	3790	83	43	172	4312	0.8431	8367	4232	8731	4265	84	44	182	4416	0.8532	7970	4091	8147	4080	84	43	185	4459	0.8094	8089	4060	8199	4020	-0.113634	-0.0823463	-0.129409	-0.0996879	-0.150736	-0.125803
Plate02	92	AAA	2	4	20	NA	YCR079W	7	58	132	3019	0.8834	14734	8274	15074	8431	7	57	158	3582	0.8751	17161	10136	17549	9937	8	58	149	3466	0.8338	16882	9689	17435	9776	8	57	155	3468	0.8379	15938	9072	16759	9328	-0.141746	-0.116931	-0.105805	-0.106687	-0.112202	-0.144587
Plate01	320	AAA	1	14	8	LYS2	YBR115C	27	34	104	2613	0.8382	16992	9164	17231	9421	27	33	75	1686	0.8796	9298	4642	9631	4836	28	34	128	2957	0.8535	12861	7207	13241	7415	28	33	103	2427	0.8331	11035	6102	11088	5983	-0.0713342	-0.0598989	-0.150446	-0.131486	-0.0554733	-0.0358792
Plate07	59	AAA	7	3	11	NA	YIR016W	37	124	131	3123	0.8864	19112	9785	19974	9988	37	123	126	3097	0.8682	19349	10055	20232	10369	38	124	134	3183	0.8356	18985	10069	19897	10700	38	123	127	3141	0.8614	19722	10043	20703	10321	-0.0817702	-0.107134	-0.173585	-0.0635327	-0.0869139	-0.101559
Plate10	247	AAA	10	11	7	NA	YMR002W	85	36	195	4871	0.8233	8616	4361	8941	4374	85	35	189	4738	0.8542	8348	4323	8602	4452	86	36	195	4965	0.7763	8910	4532	9300	4571	86	35	196	4893	0.8428	8795	4525	9175	4496	-0.0796408	-0.16297	-0.0781962	-0.0768102	-0.122238	-0.158311
Plate11	252	AAA	11	11	12	FKS3	YMR306W	53	26	185	4293	0.7682	19164	8017	19550	8144	53	25	161	3717	0.7373	18188	7645	18345	7760	54	26	179	4176	0.8165	19751	8188	20065	8319	54	25	166	3886	0.7744	18565	7797	18919	7836	-0.0593948	-0.0803844	-0.0535018	-0.0502123	-0.0597983	-0.066046
Plate09	323	AAA	9	14	11	NA	YLR408C	27	124	177	3912	0.7669	30784	12253	31446	12232	27	123	205	4544	0.8355	30640	12174	31293	12106	28	124	215	4867	0.7866	32240	13429	32437	13043	28	123	217	5070	0.7602	32029	13333	32123	13082	-0.025684	-0.0189407	-0.066524	-0.0853476	-0.0404454	-0.0386888
Plate11	77	AAA	11	4	5	CAF40	YNL288W	39	40	151	3351	0.8552	18977	7935	19270	8120	39	39	139	2948	0.8097	17887	7541	18287	7676	40	40	127	2641	0.7983	17292	7240	17316	7392	40	39	147	3090	0.8013	17795	7373	18009	7580	-0.0756699	-0.0692231	-0.0940202	-0.0731893	-0.0588822	-0.070424
Plate07	314	AAA	7	14	2	ECM25	YJL201W	59	142	172	4042	0.875	15740	7744	16178	8056	59	141	176	4078	0.882	15498	7781	15980	8137	60	142	165	3898	0.8761	16302	7813	16610	7694	60	141	171	4158	0.8488	16612	8221	16940	8529	-0.160376	-0.193031	-0.0598966	-0.155921	-0.102455	-0.1335
Plate09	250	AAA	9	11	10	NA	YLR047C	21	126	183	4078	0.7657	24725	10002	25281	10068	21	125	185	4309	0.8171	26217	10404	26699	10477	22	126	185	4267	0.7871	26160	10393	26618	10449	22	125	180	4146	0.8497	26596	10434	27204	10471	-0.0951016	-0.0648304	-0.0658814	-0.0353019	-0.0992084	-0.0623401
Plate11	110	AAA	11	5	14	NA	YMR262W	41	22	175	3963	0.8068	16585	6862	16767	6968	41	21	169	3804	0.8077	16235	6836	16397	6923	42	22	171	3832	0.7547	16689	7039	17014	7121	42	21	167	3553	0.7574	15974	6577	16393	6701	-0.0568567	-0.0804213	-0.0663294	-0.0347091	-0.0459968	-0.0720116
Plate14	44	AAA	14	2	20	RCS1	YGL071W	67	106	161	3819	0.804	18734	10572	19486	10774	67	105	155	3632	0.8209	20156	10802	20396	11214	68	106	145	3685	0.8588	20113	11002	20325	11114	68	105	156	3641	0.8358	18481	10270	18750	10402	-0.170922	-0.153026	-0.146603	-0.183731	-0.172336	-0.0893864
Plate01	191	AAA	1	8	23	NPL4	YBR170C	15	4	157	3682	0.7833	9902	5219	10120	5443	15	3	122	2840	0.8453	9598	5014	9843	5233	16	4	157	3607	0.7949	10033	5266	10292	5440	16	3	178	4143	0.8153	9915	5176	10236	5266	-0.14363	-0.133041	-0.117035	-0.0814699	-0.100876	-0.0932479
Plate01	271	AAA	1	12	7	NA	YBR209W	23	36	182	4476	0.8575	11310	6026	11596	6370	23	35	199	4890	0.854	10779	5617	11061	5745	24	36	168	4144	0.8859	9646	5153	9853	5340	24	35	191	4634	0.8412	9494	4912	9650	5035	-0.147682	-0.0803099	-0.15883	-0.111329	-0.0967682	-0.0730924
Plate14	158	AAA	14	7	14	ATP20	YPR020W	77	118	106	2536	0.8608	21400	11887	22944	12253	77	117	101	2497	0.8853	22144	12438	23479	12518	78	118	95	2409	0.8475	23090	12917	24472	13580	78	117	97	2408	0.85	21612	12230	22760	12381	-0.0853133	-0.0769517	-0.117172	-0.111614	-0.126032	-0.133879
Plate07	320	AAA	7	14	8	UBP12	YJL197W	59	130	149	3678	0.8461	18802	9626	19343	9986	59	129	147	3705	0.8849	19497	10048	19932	10369	60	130	153	3764	0.8659	18899	9709	19275	10208	60	129	152	3688	0.8509	18961	9779	19647	10334	-0.134286	-0.131698	-0.167379	-0.151181	-0.0925239	-0.0883628
Plate08	60	AAA	8	3	12	CPA2	YJR109C	5	74	132	NA	NA	5856	1399	5658	1229	5	73	NA	NA	NA	NA	NA	NA	NA	6	74	NA	NA	NA	NA	NA	NA	NA	6	73	118	NA	NA	5357	933	5251	855	-0.119695	NA	NA	-0.0248662	-0.133155	NA
Plate03	52	AAA	3	3	4	ASF2	YDL197C	5	138	129	3041	0.8385	21538	9317	22434	9582	5	137	122	2848	0.8448	21329	9186	22434	9663	6	138	119	2846	0.8335	21237	9040	22434	9443	6	137	129	3105	0.8554	21766	9458	23086	9651	-0.16276	-0.172163	-0.146424	-0.120077	-0.139439	-0.140272
Plate11	35	AAA	11	2	11	LYP1	YNL268W	35	28	200	4662	0.743	19598	8164	19621	8227	35	27	202	4627	0.7231	19117	7975	19165	8075	36	28	196	4387	0.7246	18535	7751	18746	7887	36	27	192	4177	0.8151	18279	7650	18603	7802	-0.0690414	-0.0753778	-0.0728042	-0.0681022	-0.0543213	-0.0556684
Plate09	166	AAA	9	7	22	NA	YLR012C	13	102	182	3962	0.8209	26056	10404	26748	10605	13	101	182	3960	0.7688	25964	10442	26356	10436	14	102	203	4441	0.8102	26784	10682	27308	10832	14	101	167	3579	0.721	25070	9740	25511	9911	-0.0784176	-0.0793897	-0.0753062	-0.0600167	-0.0717863	-0.0821392
Plate03	172	AAA	3	8	4	PAM1	YDR251W	15	138	122	2870	0.8358	20529	8590	21816	8956	15	137	132	3078	0.8648	21780	9297	22944	9420	16	138	133	3086	0.8076	20248	8531	21245	8573	16	137	131	3086	0.8643	20801	8894	21766	9010	-0.136311	-0.103963	-0.133681	-0.147111	-0.129823	-0.117493
Plate10	253	AAA	10	11	13	TUB3	YML124C	85	24	176	4556	0.8925	10038	5180	10379	5448	85	23	178	4465	0.8461	9730	5228	10007	5405	86	24	176	4663	0.874	10412	5341	10916	5483	86	23	165	4237	0.8609	10065	5083	10398	5094	-0.144915	-0.190531	-0.0757543	-0.0518042	-0.125066	-0.185029
Plate02	238	AAA	2	10	22	SRF4	YDL023C	19	54	173	4091	0.8971	15910	9006	16525	9314	19	53	181	4166	0.8214	16443	9476	16916	9501	20	54	172	4328	0.8446	16057	8997	16551	9162	20	53	186	4354	0.849	15330	8796	15837	8827	-0.126885	-0.116053	-0.102869	-0.123703	-0.105097	-0.12148
Plate02	258	AAA	2	11	18	NA	YBR285W	21	62	189	4452	0.8919	18158	10674	18231	11325	21	61	200	4590	0.8369	18419	10830	18721	11222	22	62	201	4832	0.8447	19048	11132	19312	11175	22	61	201	4805	0.8348	20295	11853	20418	12294	-0.22801	-0.174243	-0.119768	-0.156923	-0.125477	-0.12256
Plate13	211	AAA	13	9	19	NA	YOR365C	81	60	104	2644	0.839	11172	6017	11767	6337	81	59	75	1711	0.9092	9419	4572	10190	4849	82	60	78	2067	0.8426	15374	8037	15250	8148	82	59	102	2368	0.8517	9894	4939	10578	5085	-0.195092	-0.0624351	-0.132299	-0.0673179	-0.195443	-0.0923667
Plate02	200	AAA	2	9	8	NA	YBR277C	17	82	170	4073	0.8	36905	24431	38270	25461	17	81	170	4131	0.8849	37644	25285	39292	26432	18	82	170	4191	0.8475	37209	24652	38364	25421	18	81	174	4187	0.8444	35848	23528	37268	24457	-0.102962	-0.10842	-0.0970094	-0.0941209	-0.109021	-0.122428
Plate12	75	AAA	12	4	3	NA	YOR112W	39	92	103	2029	0.8969	14752	5677	14724	5798	39	91	95	1869	0.7845	13002	5293	12844	5337	40	92	58	946	0.7325	NA	4220	NA	4244	40	91	76	1440	0.7645	NA	4729	NA	4826	-0.0537525	-0.154526	NA	NA	-0.0168072	-0.118963
Plate08	251	AAA	8	11	11	SHE2	YKL130C	21	76	205	4666	0.8492	27226	11825	27595	11866	21	75	204	4538	0.8175	27261	11660	27666	11584	22	76	198	4564	0.7789	26557	11891	26822	11882	22	75	212	4906	0.7252	27630	11926	27946	12066	-0.0715553	-0.0366766	-0.118923	-0.072562	-0.0639829	-0.0441885
Plate11	108	AAA	11	5	12	SAP30	YMR263W	41	26	215	5495	0.7665	19483	8118	19418	8164	41	25	207	5003	0.7804	18560	7692	18669	7685	42	26	228	5941	0.6865	19836	8328	19921	8417	42	25	214	5170	0.7265	18778	7832	18856	7887	-0.0726345	-0.0411415	-0.0808937	-0.0644088	-0.0544641	-0.045716
Plate14	306	AAA	14	13	18	NA	YPR064W	89	110	155	3676	0.8921	27700	16162	28469	16765	89	109	154	3572	0.8392	27351	16106	28265	16177	90	110	156	3611	0.886	27534	15844	28314	16378	90	109	151	3520	0.8543	28459	16679	28836	17459	-0.142446	-0.109212	-0.12196	-0.172303	-0.127882	-0.143503
Plate14	307	AAA	14	13	19	NA	YPR196W	89	108	141	3310	0.8498	27136	15652	27597	16508	89	107	143	3488	0.8712	28032	16483	28329	17083	90	108	152	3515	0.8606	27876	16646	28146	17389	90	107	109	2725	0.8974	27828	15882	28750	16484	-0.173603	-0.174065	-0.206892	-0.10521	-0.118832	-0.134426
Plate11	55	AAA	11	3	7	SIW14	YNL032W	37	36	205	4789	0.8204	20489	8544	20819	8670	37	35	200	4578	0.8065	19898	8327	20417	8504	38	36	188	4301	0.7934	20232	8391	20720	8533	38	35	202	4487	0.8105	19703	8192	20063	8319	-0.0620901	-0.0611466	-0.0453334	-0.0536433	-0.0579261	-0.0616222
Plate09	283	AAA	9	12	19	ECM19	YLR390W	23	108	219	4856	0.7615	28633	11504	28899	11530	23	107	228	5006	0.7651	28828	11611	29122	11620	24	108	211	4704	0.7887	28974	11648	29373	11799	24	107	213	4734	0.8195	28846	11561	29220	11545	-0.0735473	-0.0724139	-0.0801738	-0.0584782	-0.0641776	-0.0664831
Plate14	94	AAA	14	4	22	SYC1	YOR179C	71	102	159	3897	0.8291	19821	11056	19828	10901	71	101	170	3992	0.8127	19087	10474	19411	10440	72	102	162	3904	0.8339	20024	10864	20465	10913	72	101	166	3991	0.8474	18546	10049	18909	10035	-0.159476	-0.134914	-0.111698	-0.122623	-0.146491	-0.131164
Plate12	254	AAA	12	11	14	NA	YOL008W	53	70	198	4359	0.817	24197	10346	25061	10637	53	69	177	3925	0.7689	23191	9848	23803	10143	54	70	160	3555	0.8352	22832	9665	23489	9846	54	69	177	3907	0.7767	23339	9994	23956	10209	-0.0346348	-0.0595793	-0.043611	-0.0572921	-0.0615863	-0.0655896
Plate13	126	AAA	13	6	6	GLR1	YPL091W	75	86	46	1128	0.8403	NA	6158	NA	6309	75	85	167	4156	0.8616	17150	9411	16715	9064	76	86	169	3972	0.8257	13849	7457	14308	7892	76	85	64	1573	0.9227	11234	5528	11883	5838	NA	-0.135134	-0.187467	-0.0703928	NA	-0.140088
Plate13	92	AAA	13	4	20	NA	YPL062W	71	58	151	3702	0.8879	11703	6127	11841	6011	71	57	149	3806	0.859	9582	5435	9752	5677	72	58	133	3367	0.81	13897	6582	13987	6691	72	57	141	3402	0.8624	11264	5507	11170	5476	-0.11485	-0.340217	-0.00067477	-0.0811517	-0.148059	-0.296683
Plate09	286	AAA	9	12	22	NA	YLR282C	23	102	211	4578	0.7715	27600	10968	27914	10993	23	101	200	4381	0.7192	27621	11095	28035	11203	24	102	203	4328	0.7892	27501	10962	27874	10995	24	101	208	4620	0.8466	28228	11341	28475	11465	-0.0617077	-0.0807699	-0.0641475	-0.0883988	-0.0552368	-0.0697217
Plate04	123	AAA	4	6	3	NA	YER187W	43	44	177	4203	0.8772	12092	6663	12369	6905	43	43	174	4299	0.8636	12680	7003	12922	7397	44	44	169	4036	0.8755	11969	6612	12404	6752	44	43	178	4364	0.8532	13537	7340	13797	7677	-0.154529	-0.188065	-0.118594	-0.144742	-0.114786	-0.116792
Plate10	101	AAA	10	5	5	WAR1	YML076C	73	40	96	2335	0.8064	7308	3223	7536	3417	73	39	122	2817	0.8866	5524	2727	5771	2832	74	40	122	2880	0.8475	6073	3071	6346	3155	74	39	140	3325	0.8693	6657	3488	7034	3566	-0.011117	-0.168657	-0.168575	-0.174718	0.0405616	-0.155031
Plate07	138	AAA	7	6	18	LCB3	YJL134W	43	110	162	4354	0.8506	29300	16767	29291	17697	43	109	174	4333	0.888	28361	16647	28349	17549	44	110	164	4338	0.7597	30396	17392	30854	18228	44	109	178	4461	0.8698	28471	16534	28918	17546	-0.156326	-0.200209	-0.106327	-0.167058	-0.0741843	-0.118252
Plate11	135	AAA	11	6	15	NA	YNL295W	43	20	185	4394	0.7541	17723	7384	18073	7513	43	19	205	4667	0.7011	17928	7456	18314	7610	44	20	203	4708	0.7574	17874	7480	18220	7626	44	19	204	4739	0.8088	18001	7499	18378	7667	-0.0552793	-0.0546321	-0.0650864	-0.0603742	-0.053549	-0.0508097
Plate10	117	AAA	10	5	21	SMA2	YML066C	73	8	NA	NA	NA	NA	NA	NA	NA	73	7	NA	NA	NA	NA	NA	NA	NA	74	8	125	NA	NA	575	144	555	122	74	7	79	NA	NA	680	226	675	186	NA	NA	0.0063583	-0.0863803	NA	NA
Plate02	233	AAA	2	10	17	CRD1	YDL142C	19	64	171	4019	0.8362	25549	15675	25603	16401	19	63	167	3987	0.8599	23630	14370	24357	14710	20	64	172	4099	0.8686	25139	15378	25486	16203	20	63	164	3933	0.8466	23929	14611	24271	15098	-0.17602	-0.11302	-0.167446	-0.152572	-0.103669	-0.110334
Plate02	165	AAA	2	7	21	LRE1	YCL051W	13	56	187	4376	0.8572	16526	9564	17038	9426	13	55	191	4359	0.8444	17903	10255	18717	10111	14	56	186	4433	0.8684	18727	10624	19046	10425	14	55	180	4378	0.8754	16711	9777	16860	9518	-0.0943502	-0.0381278	-0.0506907	-0.12362	-0.125946	-0.0942636
Plate03	54	AAA	3	3	6	SNF3	YDL194W	5	134	84	2017	0.8403	22926	10323	24013	10829	5	133	81	2030	0.8937	23702	10738	24559	11140	6	134	87	2179	0.8359	24433	10897	25064	11383	6	133	79	2077	0.7901	23296	10533	24464	10940	-0.177814	-0.168905	-0.156263	-0.155876	-0.146444	-0.132284
Plate13	254	AAA	13	11	14	NA	YOR277C	85	70	99	NA	NA	958	183	935	160	85	69	162	4248	0.8916	15857	8957	16444	9352	86	70	148	3675	0.8437	18214	10085	19183	10715	86	69	77	2053	0.8888	15998	8733	16031	8895	0.0224844	-0.202479	-0.150687	-0.173861	0.00077961	-0.193146
Plate06	296	AAA	6	13	8	MGA1	YGR249W	57	82	162	3984	0.8575	16585	9458	17371	9661	57	81	159	4018	0.8597	17391	10012	18369	9984	58	82	161	3956	0.8224	16884	9602	17753	9707	58	81	153	3760	0.8675	16571	9364	17679	9451	-0.0882707	-0.0494309	-0.0620307	-0.0314952	-0.0992186	-0.106741
Plate09	282	AAA	9	12	18	ECI1	YLR284C	23	110	204	4576	0.7706	28270	11309	28632	11410	23	109	210	4723	0.7419	28179	11251	28601	11350	24	110	204	4607	0.7976	28397	11381	28503	11416	24	109	206	4585	0.8092	27986	11208	28239	11351	-0.0734714	-0.0679561	-0.0810759	-0.0875191	-0.0603044	-0.0582153
Plate13	104	AAA	13	5	8	WTM1	YOR230W	73	82	111	2927	0.8382	19767	9542	18966	9222	73	81	155	3710	0.8432	14260	6994	14848	7220	74	82	89	2332	0.8554	15173	10638	14401	10323	74	81	157	3897	0.8101	17647	8872	17601	9058	0.035194	-0.0106931	-0.539491	-0.055023	0.0583666	-0.0218543
Plate12	205	AAA	12	9	13	NA	YOL092W	49	72	196	4782	0.8157	22927	9627	22960	9769	49	71	186	4611	0.7962	23480	10156	23431	10286	50	72	184	4482	0.8454	24934	10263	25174	10334	50	71	194	4599	0.7797	22276	9743	22447	9838	-0.070407	-0.102825	0.00864411	-0.115745	-0.0542192	-0.0857498
Plate04	254	AAA	4	11	14	SPG3	YDR504C	53	22	184	4630	0.8545	17409	9532	17995	9781	53	21	183	4693	0.8546	18197	9962	18731	10381	54	22	184	4688	0.8415	17298	9634	17685	10150	54	21	182	4737	0.8855	17637	9740	18103	9937	-0.0987051	-0.124203	-0.176705	-0.112351	-0.0968115	-0.0955605
Plate14	210	AAA	14	9	18	NTO1	YPR031W	81	110	138	3416	0.8844	22996	12860	23811	13376	81	109	155	3577	0.8073	23555	13080	24021	13392	82	110	143	3446	0.8106	22578	12653	23536	13078	82	109	153	3698	0.8654	23806	13499	24216	13837	-0.141025	-0.128651	-0.130119	-0.158161	-0.119739	-0.104953
Plate10	35	AAA	10	2	11	RIM13	YMR154C	67	28	107	2690	0.7613	6028	2920	6180	3010	67	27	109	2733	0.8247	6304	3130	6376	3078	68	28	82	2223	0.763	5649	2791	5714	2858	68	27	74	2032	0.7961	5982	2790	6169	2895	-0.145904	-0.128032	-0.196233	-0.0960682	-0.116832	-0.143978
Plate02	162	AAA	2	7	18	NA	YBR259W	13	62	180	4322	0.7876	20583	12180	21041	12426	13	61	179	4040	0.8472	19630	11731	20432	11763	14	62	178	4234	0.8165	21033	12329	21866	12407	14	61	180	4186	0.8482	20231	11821	20926	11978	-0.123478	-0.0980807	-0.0608325	-0.0840982	-0.105878	-0.129785
Plate10	156	AAA	10	7	12	FPR4	YLR449W	77	26	131	3340	0.8648	7956	4171	8304	4289	77	25	125	3231	0.8223	8019	3841	8267	3932	78	26	67	1597	0.7506	5616	2826	5740	2841	78	25	100	2644	0.8738	8757	4240	9371	4446	-0.167159	-0.0572059	-0.181205	-0.029202	-0.182518	-0.0579676
Plate01	53	AAA	1	3	5	SHE1	YBL031W	5	40	173	4017	0.807	16619	9341	16910	9789	5	39	69	1606	0.8599	14821	7605	15425	7897	6	40	45	1078	0.847	NA	5458	NA	5690	6	39	183	4218	0.8786	16338	9270	16946	9236	-0.151984	-0.00210529	NA	-0.0700681	-0.115329	-0.00754674
Plate03	83	AAA	3	4	11	UBX5	YDR330W	7	124	165	3837	0.8764	27057	13362	28319	13913	7	123	166	4033	0.8646	28184	13890	29596	14247	8	124	158	3810	0.8728	27579	13609	28579	14360	8	123	173	4109	0.8405	27624	13591	28619	14162	-0.154214	-0.0994827	-0.171472	-0.154088	-0.140325	-0.109601
Plate06	238	AAA	6	10	22	LSM12	YHR121W	51	54	131	3159	0.8241	22062	12567	23005	12616	51	53	123	2799	0.8015	19726	11624	20645	11836	52	54	141	3348	0.8318	21635	12576	22541	12640	52	53	143	3276	0.8508	21826	12655	22285	12547	-0.0333743	-0.108214	-0.0666691	-0.0736719	-0.0650448	-0.124557
Plate07	321	AAA	7	14	9	NA	YJR096W	59	128	165	4090	0.8933	19744	10125	20336	10179	59	127	165	4083	0.8521	19127	9940	20112	10060	60	128	168	4022	0.847	19200	9887	20105	9961	60	127	163	4031	0.8971	19806	10061	20598	10156	-0.0757505	-0.0793657	-0.0676625	-0.0518942	-0.0777108	-0.1056
Plate10	59	AAA	10	3	11	NA	YML058C-A	69	28	178	4458	0.8534	10327	4938	10681	4944	69	27	122	NA	NA	767	324	744	266	70	28	170	4308	0.8787	9866	4747	10063	4768	70	27	182	4699	0.865	10326	4925	10389	4907	0.0297573	-0.320937	-0.0133859	-0.00286994	-0.0165958	-0.412563
Plate11	89	AAA	11	4	17	PRM1	YNL279W	39	16	153	3322	0.7633	15218	6309	15576	6440	39	15	184	4123	0.7937	15742	6495	16032	6649	40	16	180	4078	0.7773	15849	6572	16141	6641	40	15	179	3835	0.787	15293	6329	15585	6412	-0.0545825	-0.056612	-0.0449004	-0.0476284	-0.0554755	-0.0456498
Plate04	165	AAA	4	7	21	RAD23	YEL037C	45	8	159	3791	0.8326	16869	9480	17423	9287	45	7	159	3912	0.8432	17611	9800	18421	9687	46	8	154	3644	0.8895	15999	8899	16560	8722	46	7	103	2464	0.7709	15864	8328	16692	8850	-0.0726208	-0.050672	-0.0581497	-0.0671692	-0.134803	-0.119714
Plate14	47	AAA	14	2	23	NA	YGR122C-A	67	100	174	3930	0.7996	19522	10506	19796	10676	67	99	180	3976	0.8052	19071	10456	19696	10582	68	100	167	3849	0.8712	19629	10755	19572	11173	68	99	167	3866	0.7929	19532	10624	19762	10884	-0.134232	-0.130316	-0.212458	-0.162586	-0.100824	-0.130113
Plate04	136	AAA	4	6	16	NA	YER071C	43	18	167	4260	0.8036	17929	9924	18612	10391	43	17	169	4283	0.8083	17792	9800	18485	10062	44	18	177	4426	0.8464	17326	9616	17900	9996	44	17	162	4072	0.8392	18066	9771	18879	10258	-0.134929	-0.0994036	-0.137296	-0.0957588	-0.111674	-0.104841
Plate11	253	AAA	11	11	13	RHO2	YNL090W	53	24	188	4549	0.8008	18638	7759	19088	7860	53	23	184	4205	0.7639	18219	7645	18669	7838	54	24	187	4445	0.8189	18627	7732	19034	7808	54	23	197	4613	0.8015	18961	7823	19296	7942	-0.0418965	-0.069681	-0.0363246	-0.0414637	-0.0522257	-0.0635891
Plate09	189	AAA	9	8	21	STE11	YLR362W	15	104	130	NA	NA	6345	1238	6200	1104	15	103	NA	NA	NA	NA	NA	NA	NA	16	104	154	NA	NA	6478	1367	6220	1167	16	103	138	NA	NA	5474	882	5469	873	-0.00836867	NA	-0.0463822	-0.101399	-0.0273127	NA
Plate11	136	AAA	11	6	16	NA	YNL171C	43	18	61	966	0.6095	NA	4449	NA	4674	43	17	116	2474	0.7992	15023	6171	15174	6255	44	18	107	2128	0.7702	13944	5716	14050	5900	44	17	158	3859	0.7486	20532	8553	20884	8675	NA	-0.0528855	-0.0882237	-0.0585472	NA	-0.0440325
Plate10	126	AAA	10	6	6	NAM7	YMR080C	75	38	160	3981	0.867	6923	3408	7182	3385	75	37	164	4137	0.8542	6832	3370	7110	3339	76	38	173	4099	0.8661	6872	3364	7217	3297	76	37	164	4009	0.8612	6868	3365	7080	3371	-0.0725871	-0.0697105	-0.0296753	-0.0890509	-0.117909	-0.122691
Plate01	278	AAA	1	12	14	RXT2	YBR095C	23	22	117	2819	0.8626	10694	5505	11295	5601	23	21	149	3367	0.8717	10675	5599	10918	5587	24	22	138	3128	0.8928	10779	5658	11147	5727	24	21	132	2941	0.8803	10071	5327	10790	5456	-0.013886	-0.0625409	-0.064194	-0.0485403	-0.0574555	-0.0833674
Plate03	56	AAA	3	3	8	ARF1	YDL192W	5	130	106	2573	0.8078	24891	11446	26411	11716	5	129	101	2403	0.8604	21004	9371	22071	9712	6	130	87	2259	0.783	24677	11032	24775	11013	6	129	109	2627	0.8816	24879	11093	26162	11544	-0.0941032	-0.206659	-0.140657	-0.0949234	-0.117477	-0.189814
Plate02	303	AAA	2	13	15	SYP1	YCR030C	25	68	176	4001	0.8637	16774	9419	17392	9486	25	67	155	3527	0.8573	15388	8764	16206	8889	26	68	170	4009	0.8817	17124	9690	17891	9572	26	67	163	3874	0.8761	16283	9287	16648	9043	-0.0702549	-0.096511	-0.0375047	-0.0765456	-0.0824599	-0.120848
Plate03	184	AAA	3	8	16	PEX5	YDR244W	15	114	69	1794	0.7862	25744	11819	27279	12218	15	113	67	1625	0.7999	25618	12009	26467	12665	16	114	67	1676	0.7894	25084	11781	27012	12281	16	113	61	1558	0.8671	25098	11744	26752	12199	-0.0816639	-0.175054	-0.104952	-0.115075	-0.0934944	-0.119909
Plate12	278	AAA	12	12	14	NA	YOR062C	55	70	185	4124	0.8396	21018	8731	21476	9017	55	69	175	3848	0.8103	21090	8800	21512	8969	56	70	172	3797	0.8534	21028	8680	21481	8929	56	69	184	4077	0.8311	21284	8899	21632	9156	-0.0730944	-0.0634635	-0.059875	-0.0816914	-0.0612563	-0.0664495
Plate08	311	AAA	8	13	23	NA	YKL137W	25	52	178	3757	0.7901	27270	11930	27850	11942	25	51	189	4016	0.7659	28081	12513	28553	12595	26	52	175	3726	0.7911	27849	12032	28430	12117	26	51	153	3214	0.776	26500	11189	27010	11234	-0.0649121	-0.0922582	-0.050249	-0.0357353	-0.0724961	-0.0844337
Plate07	136	AAA	7	6	16	NA	YJL135W	43	114	171	4455	0.8036	25103	13840	25259	14767	43	113	173	4534	0.8241	25660	14096	25522	14671	44	114	165	4525	0.884	25597	14187	25263	14871	44	113	174	4473	0.8271	24830	13683	24814	14320	-0.178756	-0.153598	-0.187147	-0.170211	-0.0842238	-0.0716912
Plate09	236	AAA	9	10	20	PDR8	YLR266C	19	106	188	4228	0.8175	28241	11054	28680	11039	19	105	203	4635	0.7975	28057	11296	28309	11414	20	106	199	4465	0.7846	28080	11282	28299	11216	20	105	201	4472	0.7804	28170	11277	28443	11265	-0.0259984	-0.0912604	-0.0680265	-0.0661966	-0.0308247	-0.0702619
Plate11	189	AAA	11	8	21	NA	YNL303W	47	8	170	3853	0.7866	15549	6535	15772	6602	47	7	177	3955	0.8537	14975	6101	15112	6196	48	8	180	4188	0.7715	16029	6649	16134	6697	48	7	152	3299	0.7984	14995	6149	15310	6270	-0.0708475	-0.0458394	-0.0573647	-0.0428915	-0.0725695	-0.0330267
Plate03	29	AAA	3	2	5	IPK1	YDR315C	3	136	75	1888	0.8522	29005	14317	30483	14733	3	135	85	2183	0.8079	27443	13009	27743	12781	4	136	71	1771	0.8717	25511	12825	26696	13582	4	135	81	2135	0.7931	25538	11728	26584	12088	-0.0814366	-0.100011	-0.235106	-0.116457	-0.0909779	-0.0856089
Plate09	86	AAA	9	4	14	NA	YLR224W	7	118	204	4613	0.8363	27296	10916	27862	11044	7	117	197	4322	0.7947	27319	10834	27690	10839	8	118	207	4745	0.7022	27458	10968	27929	11192	8	117	210	4678	0.7088	27974	11066	28360	11150	-0.0708361	-0.0549122	-0.0852249	-0.0567232	-0.0656983	-0.0541759
Plate04	210	AAA	4	9	18	KRE2	YDR483W	49	14	116	2806	0.781	16968	9354	18011	9597	49	13	130	3242	0.7856	18263	9501	18902	9520	50	14	142	3473	0.7996	18307	10258	19052	10764	50	13	138	3369	0.8414	17378	9825	18077	10292	-0.0704767	0.0118161	-0.150557	-0.164202	-0.107144	-0.022501
Plate11	75	AAA	11	4	3	PCL1	YNL289W	39	44	186	3990	0.7665	20013	8379	20475	8526	39	43	193	4078	0.8025	20075	8288	20500	8479	40	44	180	3781	0.7596	19806	8182	20270	8401	40	43	183	3884	0.8198	19912	8271	20310	8484	-0.0609351	-0.0510774	-0.0534719	-0.0651212	-0.0625646	-0.0421662
Plate13	268	AAA	13	12	4	SPP1	YPL138C	87	90	100	2348	0.7942	11662	5943	12410	6243	87	89	108	2590	0.8296	11831	6185	12338	6375	88	90	83	2097	0.8118	16765	8402	16107	8164	88	89	92	2138	0.8261	10954	5760	11439	5894	-0.0927242	-0.129718	-0.0508883	-0.142212	-0.112555	-0.143931
Plate14	150	AAA	14	7	6	ATH1	YPR026W	77	134	181	4251	0.9106	22098	12099	22137	12141	77	133	183	4278	0.8692	21830	11989	22094	12114	78	134	186	4259	0.8532	20904	11557	21361	11556	78	133	186	4289	0.8248	21380	11847	21384	12103	-0.12958	-0.129711	-0.120568	-0.179843	-0.100137	-0.106762
Plate04	51	AAA	4	3	3	VAC8	YEL013W	37	44	90	2433	0.8476	11743	6440	12111	6865	37	43	97	2919	0.8313	13172	7223	13424	7385	38	44	100	2808	0.797	12072	6530	12358	6744	38	43	89	2500	0.8184	12551	6827	12666	7043	-0.1772	-0.129891	-0.12236	-0.147803	-0.108796	-0.105628
Plate08	187	AAA	8	8	19	MLP1	YKR095W	15	60	155	3332	0.7396	24557	10336	24555	10349	15	59	161	3589	0.7522	25207	10617	25225	10570	16	60	154	3371	0.7955	25166	10821	25308	10748	16	59	174	3934	0.8468	25276	10644	25672	10650	-0.0808925	-0.0658008	-0.0822584	-0.0476957	-0.0593338	-0.0517497
Plate03	80	AAA	3	4	8	UPC2	YDR213W	7	130	111	2819	0.8576	24010	10730	25616	11198	7	129	114	2719	0.8409	24240	10931	26093	11564	8	130	126	3003	0.8438	24013	10978	25558	11646	8	129	125	2964	0.8427	24738	11308	26300	11842	-0.0993319	-0.101548	-0.146386	-0.113334	-0.108707	-0.112744
Plate13	327	AAA	13	14	15	ICY2	YPL250C	91	68	105	2650	0.8369	10684	5354	10819	5274	91	67	129	3299	0.8523	16935	9427	16375	9293	92	68	126	3167	0.82	18468	9617	18932	10258	92	67	144	3872	0.8318	17911	9706	18020	9769	-0.0807742	-0.200377	-0.111752	-0.121178	-0.108113	-0.1617
Plate01	148	AAA	1	7	4	NA	YAL053W	13	42	172	3923	0.8573	17450	9630	17910	9991	13	41	175	4041	0.8698	17694	9749	18256	10199	14	42	188	4141	0.8625	17345	9506	17831	9998	14	41	173	3924	0.9027	17496	9656	17989	10172	-0.0914901	-0.0899886	-0.0992167	-0.109007	-0.0827794	-0.078427
Plate14	305	AAA	14	13	17	NA	YPR197C	89	112	144	3369	0.8769	21337	11714	21962	11778	89	111	135	3143	0.8506	19648	10743	20186	10558	90	112	133	3037	0.842	20496	11074	21451	11196	90	111	131	3157	0.8638	20642	11351	21384	11112	-0.102166	-0.0891167	-0.0721501	-0.0670696	-0.110917	-0.121161
Plate07	132	AAA	7	6	12	GLG2	YJL137C	43	122	132	3160	0.8928	18854	9648	19911	9981	43	121	130	3080	0.8272	19025	9573	20048	9860	44	122	131	3170	0.8468	18997	9707	20193	10072	44	121	135	3166	0.8105	19171	9739	20436	10192	-0.0860935	-0.0596786	-0.0742369	-0.069269	-0.0909634	-0.0664676
Plate07	355	AAA	7	15	19	NA	YJL068C	61	108	182	4260	0.8215	23270	12713	24034	12980	61	107	183	4305	0.827	24466	13380	25073	13678	62	108	175	4158	0.8314	25219	13881	25924	13803	62	107	177	4246	0.8434	25534	13827	26323	13940	-0.101628	-0.0964609	-0.0525659	-0.0395154	-0.100012	-0.083295
Plate08	282	AAA	8	12	18	SAP190	YKR028W	23	62	173	3662	0.7294	21936	8944	22487	9071	23	61	173	3514	0.7523	21547	8902	22025	8990	24	62	161	3559	0.752	22057	9045	22251	9195	24	61	172	3660	0.7478	22164	9047	22707	9143	-0.0468068	-0.0676378	-0.0812251	-0.0418852	-0.052671	-0.0749944
Plate08	99	AAA	8	5	3	NA	YKL091C	9	92	170	3681	0.8012	25973	11132	26635	11169	9	91	187	4038	0.788	27248	11893	27769	11922	10	92	168	3696	0.8084	26466	11251	26993	11345	10	91	165	3658	0.8222	26028	11091	26454	11192	-0.0505983	-0.0674576	-0.0493855	-0.0641338	-0.0639033	-0.0698941
Plate01	83	AAA	1	4	11	YSW1	YBR148W	7	28	175	4315	0.898	18343	9778	18790	10167	7	27	182	4266	0.8248	17875	9828	18453	10235	8	28	165	4003	0.8305	17800	10056	18340	10510	8	27	185	4353	0.8755	17248	9632	17685	10035	-0.0415097	-0.0782837	-0.12353	-0.116819	-0.0276835	-0.0739596
Plate07	114	AAA	7	5	18	SDS3	YIL084C	41	110	126	3143	0.8243	24551	13134	23853	12054	41	109	143	3487	0.8286	29625	17043	31050	17518	42	110	125	3034	0.7897	21048	10968	20996	10759	42	109	128	2990	0.8562	19899	10493	19779	10172	-0.0225981	-0.0471182	-0.091972	-0.120559	-0.0542382	-0.0766859
Plate10	83	AAA	10	4	11	MSS11	YMR164C	71	28	130	3190	0.8567	7258	3431	7564	3514	71	27	134	3300	0.8004	7479	3849	7883	3912	72	28	113	2716	0.8428	6709	3451	7133	3564	72	27	148	3626	0.8468	8085	3812	8579	4004	-0.0430429	-0.123642	-0.152431	-0.0245104	-0.0553062	-0.166745
Plate08	317	AAA	8	14	5	NA	YLL044W	27	88	NA	NA	NA	NA	NA	NA	NA	27	87	NA	NA	NA	NA	NA	NA	NA	28	88	153	NA	NA	6588	1667	6166	1304	28	87	NA	NA	NA	NA	NA	NA	NA	NA	NA	0.0104092	NA	NA	NA
Plate10	246	AAA	10	11	6	PSP2	YML017W	85	38	131	3139	0.7725	6264	2983	6498	2997	85	37	128	3065	0.8263	6209	3042	6422	3025	86	38	93	2320	0.8729	6295	3050	6633	3207	86	37	134	3464	0.8743	7961	3967	8421	4137	-0.0629473	-0.0935704	-0.122491	-0.0970875	-0.0878518	-0.128031
Plate07	229	AAA	7	10	13	PTK2	YJR059W	51	120	148	3560	0.8799	18219	9121	19258	9136	51	119	139	3323	0.8325	17960	9123	18701	9181	52	120	148	3543	0.8292	18409	9191	19356	9506	52	119	152	3606	0.786	18395	9222	19578	9617	-0.0309611	-0.0852587	-0.0719786	-0.067671	-0.0748679	-0.0982487
Plate09	83	AAA	9	4	11	SPO77	YLR341W	7	124	202	4615	0.7989	27308	10904	27449	10998	7	123	198	4505	0.7741	27481	10811	27582	10800	8	124	197	4528	0.6998	27205	10799	27281	10825	8	123	201	4773	0.8047	27860	11119	27835	11163	-0.0880228	-0.0560117	-0.0759463	-0.0868568	-0.0635335	-0.0422569
Plate11	46	AAA	11	2	22	CPT1	YNL130C	35	6	207	4723	0.705	16261	6715	16259	6808	35	5	193	4212	0.7523	16080	6743	15961	6795	36	6	196	4331	0.7924	15379	6290	15491	6348	36	5	195	4182	0.8669	15646	6446	15679	6488	-0.0691689	-0.09375	-0.0426107	-0.0551896	-0.0444471	-0.0668305
Plate09	259	AAA	9	11	19	PCD1	YLR151C	21	108	209	4561	0.763	28115	11143	28503	11199	21	107	218	4682	0.7819	27921	11163	28142	11338	22	108	209	4681	0.7835	28278	11216	28375	11245	22	107	212	4557	0.7151	27935	11169	28177	11197	-0.0549966	-0.0912165	-0.0674377	-0.0723237	-0.0485536	-0.0615519
Plate09	267	AAA	9	12	3	NA	YLR400W	23	140	190	3959	0.6795	29378	11745	29855	11846	23	139	208	4502	0.8256	30028	12211	30669	12267	24	140	188	3972	0.8006	29770	11801	30316	11821	24	139	192	4087	0.765	29521	11806	30019	11714	-0.0608236	-0.0675898	-0.0346301	-0.0372062	-0.0534338	-0.0734318
Plate14	69	AAA	14	3	21	NA	YPR097W	69	104	177	3845	0.775	16644	8974	17298	8889	69	103	182	4199	0.8475	17420	9253	18027	9256	70	104	188	4065	0.859	16974	9024	17688	9181	70	103	183	4239	0.8078	17819	9445	18324	9541	-0.0980313	-0.0883546	-0.106824	-0.103676	-0.12959	-0.101943
Plate02	219	AAA	2	10	3	NA	YDL157C	19	92	156	3721	0.8224	37654	24828	38398	25695	19	91	143	3445	0.8086	36827	24854	37749	25596	20	92	161	3898	0.8573	37193	24225	38115	24535	20	91	157	3731	0.8547	36761	23367	37716	24222	-0.10929	-0.131749	-0.0621062	-0.0625784	-0.0982423	-0.134743
Plate03	166	AAA	3	7	22	NA	YDL218W	13	102	156	3762	0.8228	39586	25288	40087	25168	13	101	172	3937	0.8376	38803	24036	39368	24401	14	102	100	2374	0.7832	37680	23240	38716	24320	14	101	121	2925	0.8047	38472	23694	38818	23625	-0.123839	-0.127268	-0.155466	-0.121501	-0.117228	-0.103179
Plate10	230	AAA	10	10	14	MYO5	YMR109W	83	22	168	4249	0.8301	11253	5684	11059	5560	83	21	104	3040	0.8456	15761	10020	16473	10755	84	22	159	3874	0.8761	12799	6233	13316	6276	84	21	157	4310	0.8167	12871	6255	13045	6344	-0.0744302	-0.344795	0.0492849	0.00309257	-0.0781418	-0.339137
Plate12	27	AAA	12	2	3	NA	YOR097C	35	92	127	2641	0.7722	19152	7959	19131	7877	35	91	146	3078	0.7728	20289	8195	19901	8233	36	92	104	1970	0.7563	15776	6421	15429	6454	36	91	104	1989	0.7231	15072	5920	15006	6037	-0.0728603	-0.0714685	-0.127415	-0.0791924	-0.079823	-0.0308219
Plate14	62	AAA	14	3	14	DIP5	YPL265W	69	118	153	3598	0.8809	20263	11043	20769	11120	69	117	170	3870	0.8511	19919	10861	20773	11017	70	118	163	3838	0.8963	19947	10825	20483	10770	70	117	152	3517	0.8943	21211	11497	21531	11940	-0.113586	-0.100963	-0.0928213	-0.151253	-0.111026	-0.114903
Plate09	43	AAA	9	2	19	BUD6	YLR319C	3	108	194	4226	0.7284	26082	10374	26346	10519	3	107	196	4118	0.7173	25997	10229	26423	10390	4	108	188	4153	0.7592	26012	10196	26358	10342	4	107	184	3978	0.725	25951	10191	26405	10245	-0.0906653	-0.0695287	-0.0670639	-0.0516153	-0.0663534	-0.0523413
Plate13	130	AAA	13	6	10	RLM1	YPL089C	75	78	136	3287	0.8868	16870	8186	17816	8565	75	77	113	2848	0.8774	17800	8443	17564	8332	76	78	167	4152	0.8919	16910	8860	17735	8989	76	77	80	1931	0.8428	7233	4320	7690	4481	0.0392459	0.0546381	-0.0330548	-0.398072	0.0235318	0.0638869
Plate09	212	AAA	9	9	20	ADE16	YLR028C	17	106	210	4762	0.7433	26849	10510	27130	10572	17	105	203	4738	0.7775	26835	10782	26881	10730	18	106	204	4621	0.8014	26682	10495	26810	10450	18	105	208	4634	0.8607	26410	10421	26691	10427	-0.052456	-0.0866525	-0.0549774	-0.0588311	-0.039557	-0.0749773
Plate08	185	AAA	8	8	17	NA	YKR096W	15	64	190	4161	0.791	26814	11514	27228	11331	15	63	187	4387	0.8001	26874	11462	26886	11316	16	64	192	4316	0.8068	26691	11539	27060	11674	16	63	175	3943	0.7787	26015	11125	26363	11053	-0.0339257	-0.0524483	-0.0821183	-0.053504	-0.0551202	-0.0457725
Plate11	113	AAA	11	5	17	NA	YNL043C	41	16	185	4459	0.7839	17363	7252	17325	7339	41	15	197	4688	0.7914	17239	7172	17396	7287	42	16	207	4903	0.7972	17741	7267	17868	7344	42	15	189	4350	0.7527	17382	7203	17632	7263	-0.0829653	-0.0668428	-0.0391148	-0.0425254	-0.0575592	-0.0521596
Plate02	279	AAA	2	12	15	NRP1	YDL167C	23	68	176	4127	0.8944	20828	12213	21527	12549	23	67	172	4105	0.8396	20841	12281	21587	12481	24	68	177	4185	0.87	20572	11904	21376	12004	24	67	175	4142	0.8686	19994	11765	20432	11989	-0.100361	-0.0888622	-0.0533647	-0.122984	-0.0910576	-0.0974661
Plate08	189	AAA	8	8	21	RPL40B	YKR094C	15	56	154	3333	0.7989	26336	11298	27087	11413	15	55	157	3257	0.8313	25310	10661	26100	10867	16	56	164	3498	0.7817	26108	11210	26786	11399	16	55	183	4069	0.796	26461	11281	27120	11394	-0.0514996	-0.047554	-0.0678059	-0.0474103	-0.0602665	-0.0504786
Plate03	66	AAA	3	3	18	NA	YDL187C	5	110	121	2900	0.8371	34895	19032	36350	19665	5	109	125	2981	0.8772	33741	19427	35015	20183	6	110	165	4029	0.8672	36328	22374	37242	21336	6	109	157	3813	0.7836	36401	21087	37261	22185	-0.0584984	-0.154763	-0.0964657	-0.135081	-0.0586973	-0.142011
Plate09	256	AAA	9	11	16	TRX1	YLR043C	21	114	216	4953	0.7589	28677	11433	28930	11445	21	113	216	4859	0.7274	28584	11357	28961	11341	22	114	199	4638	0.8114	28573	11360	28912	11423	22	113	206	4764	0.7802	28545	11429	28794	11410	-0.0618452	-0.0477943	-0.0601768	-0.0648651	-0.0533997	-0.0492536
Plate06	290	AAA	6	13	2	NA	YGR259C	57	94	120	2705	0.8886	10288	5436	10762	5657	57	93	130	2970	0.876	10839	5864	11406	6072	58	94	133	3017	0.8866	10543	5687	11165	6014	58	93	126	2986	0.8579	10648	5830	11198	6033	-0.0822777	-0.0892422	-0.108866	-0.108631	-0.0604973	-0.0840771
Plate03	174	AAA	3	8	6	NA	YDR250C	15	134	134	3180	0.8541	22733	9884	24169	10285	15	133	126	3036	0.8307	23246	10112	24675	10427	16	134	130	3170	0.8449	22773	9933	24148	9904	16	133	147	3414	0.842	23097	10137	24127	10314	-0.109357	-0.0876137	-0.0690893	-0.115566	-0.112161	-0.0987856
Plate11	167	AAA	11	7	23	VAC7	YNL054W	45	4	206	4913	0.7362	15639	6469	15770	6572	45	3	201	4706	0.7796	15605	6405	15756	6463	46	4	189	4585	0.7861	15558	6430	15647	6500	46	3	185	4240	0.7741	15118	6212	15128	6270	-0.064643	-0.0425088	-0.0608111	-0.0607545	-0.0497882	-0.0391204
Plate10	272	AAA	10	12	8	SAS2	YMR127C	87	34	189	4885	0.8669	8726	4508	8911	4558	87	33	194	4906	0.8312	8479	4307	8840	4398	88	34	186	4759	0.832	9242	4708	9475	4971	88	33	122	3114	0.793	8580	4026	8528	4155	-0.140215	-0.104504	-0.162225	-0.0834687	-0.148231	-0.129583
Plate02	53	AAA	2	3	5	GRX1	YCL035C	5	88	179	4080	0.886	26957	16437	28003	16329	5	87	183	4033	0.8407	26520	16229	27544	16430	6	88	163	3878	0.884	25708	15898	26602	16180	6	87	181	4049	0.868	26990	16375	28052	16540	-0.0283659	-0.0625756	-0.0977492	-0.0422933	-0.0826154	-0.0913301
Plate11	315	AAA	11	14	3	NA	YNR018W	59	44	151	3299	0.7965	24252	9909	24946	10063	59	43	159	3412	0.7833	24477	10048	25389	10175	60	44	158	3424	0.733	23710	9606	24160	9731	60	43	115	2387	0.797	19476	8136	20077	8383	-0.0331813	-0.0258437	-0.0265707	-0.0638898	-0.0433681	-0.0516928
Plate09	167	AAA	9	7	23	NA	YLR118C	13	100	182	3901	0.7306	27543	10907	28068	10903	13	99	203	4484	0.7287	27813	11053	28087	11055	14	100	199	4303	0.8195	27809	11030	28137	10925	14	99	196	4217	0.7976	27586	10948	27897	10955	-0.0421462	-0.0598895	-0.0411244	-0.0579444	-0.0508179	-0.0539955
Plate09	231	AAA	9	10	15	FBP1	YLR377C	19	116	205	4649	0.7189	29010	11574	29415	11587	19	115	180	3989	0.7902	27943	11187	28521	11227	20	116	194	4190	0.7684	28235	11177	28856	11187	20	115	193	4243	0.7852	28136	11142	28511	11137	-0.0532892	-0.0574248	-0.0347481	-0.0470279	-0.0525582	-0.0632725
Plate07	184	AAA	7	8	16	RPA34	YJL148W	47	114	117	2950	0.8771	38884	24299	41309	26114	47	113	116	2895	0.8239	39160	25049	41389	26684	48	114	124	3097	0.7916	39865	24543	42614	26600	48	113	126	3167	0.8269	39363	24732	41433	26986	-0.058566	-0.0815453	-0.0289578	-0.0934286	-0.0743302	-0.100496
Plate14	33	AAA	14	2	9	WWM1	YFL010C	67	128	83	NA	NA	1189	283	1144	249	67	127	NA	NA	NA	NA	NA	NA	NA	68	128	57	NA	NA	1297	321	1262	287	68	127	96	NA	NA	1256	622	983	315	0.10605	NA	0.111171	-0.427821	0.166365	NA
Plate06	86	AAA	6	4	14	NMD2	YHR077C	39	70	170	4066	0.8935	17285	9824	17960	9949	39	69	158	3714	0.878	16845	9556	17791	9757	40	70	174	4354	0.8319	17802	10064	18183	10106	40	69	159	3684	0.8216	15792	8763	16557	8901	-0.0785135	-0.065891	-0.0815101	-0.0478692	-0.0896813	-0.0901157
Plate01	63	AAA	1	3	15	NCL1	YBL024W	5	20	177	4303	0.8697	14022	7362	14153	7632	5	19	171	4282	0.8659	14004	7479	14185	7723	6	20	170	4403	0.8838	14688	7747	14590	8095	6	19	131	3153	0.8694	12797	7058	13034	7245	-0.0876146	-0.100217	-0.120845	-0.143116	-0.0468965	-0.0704732
Plate11	132	AAA	11	6	12	NOP13	YNL175C	43	26	223	5490	0.7238	19631	8152	19678	8186	43	25	212	5166	0.7676	19113	7974	19122	8067	44	26	210	5392	0.6997	20399	8303	20377	8350	44	25	217	5406	0.6629	19705	8193	19792	8215	-0.0576094	-0.0771452	-0.0370705	-0.0545557	-0.0497757	-0.0557854
Plate07	158	AAA	7	7	14	NA	YIL100W	45	118	164	4125	0.8709	24140	12847	24797	13308	45	117	168	4051	0.8252	23863	12847	24876	13294	46	118	164	4026	0.8341	23641	12819	24719	13447	46	117	163	3960	0.8039	23355	12602	24305	13003	-0.0808778	-0.074328	-0.0989083	-0.0853145	-0.0537268	-0.072448
Plate04	128	AAA	4	6	8	PTP3	YER075C	43	34	139	3703	0.8762	17266	9482	17389	9942	43	33	142	3842	0.8158	17560	9500	18024	9798	44	34	152	3999	0.8679	17077	9454	17371	9762	44	33	153	4016	0.8214	17369	9318	17610	9757	-0.172128	-0.0988033	-0.147742	-0.126963	-0.101279	-0.0794397
Plate11	308	AAA	11	13	20	NA	YMR316C-A	57	10	162	3611	0.7763	16261	6657	16516	6797	57	9	181	4140	0.8101	16761	7068	17108	7172	58	10	171	3919	0.7652	16563	6795	16814	7008	58	9	194	4288	0.7986	16354	6732	16731	6825	-0.0437971	-0.0684505	-0.0608834	-0.0306049	-0.0322186	-0.0724482
Plate03	71	AAA	3	3	23	SNF11	YDR073W	5	100	183	4021	0.7903	33690	18899	35442	19275	5	99	192	4079	0.7414	34341	19679	35786	20404	6	100	185	4251	0.8182	34891	20050	36019	20123	6	99	187	4090	0.8034	35579	19998	36819	20448	-0.0849727	-0.125369	-0.0990969	-0.0745206	-0.115848	-0.123121
Plate10	171	AAA	10	8	3	APP2	YMR192W	79	44	150	3599	0.8473	7893	3956	8096	4130	79	43	161	3900	0.8872	8672	4351	9050	4380	80	44	162	4137	0.8905	8998	4367	8852	4393	80	43	188	4515	0.8062	8542	4311	8798	4291	-0.155461	-0.0628098	-0.100885	-0.078735	-0.122323	-0.109257
Plate01	161	AAA	1	7	17	PTC3	YBL056W	13	16	163	4183	0.821	19594	10868	19397	11063	13	15	164	4203	0.8689	18824	10483	18688	10616	14	16	170	4355	0.8708	19601	10861	19136	11007	14	15	178	4494	0.892	18692	10253	18557	10551	-0.106757	-0.108235	-0.120707	-0.110737	-0.0711611	-0.0831576
Plate03	119	AAA	3	5	23	UBC13	YDR092W	9	100	111	2402	0.8006	38039	24053	39430	24669	9	99	176	3742	0.8428	39797	25050	40654	26072	10	100	168	3804	0.7581	41519	27050	42234	28332	10	99	154	3334	0.8549	39568	24621	40383	25079	-0.135181	-0.132158	-0.141231	-0.106396	-0.14104	-0.0977077
Plate01	189	AAA	1	8	21	SEC66	YBR171W	15	8	149	3657	0.8237	12020	6401	12421	6582	15	7	125	3138	0.8907	11602	6116	11841	6263	16	8	141	3567	0.8433	12218	6358	12480	6504	16	7	135	3331	0.8425	11641	6087	11956	6237	-0.0867799	-0.0927257	-0.0633775	-0.0722911	-0.087612	-0.0785681
Plate03	272	AAA	3	12	8	PMP3	YDR276C	23	130	66	1834	0.8505	30656	15999	31801	16286	23	129	67	1886	0.8513	30298	15746	31242	15787	24	130	61	1649	0.937	29861	15602	30285	16112	24	129	71	1932	0.8721	32563	17004	33387	17459	-0.109886	-0.109622	-0.188065	-0.0931099	-0.110932	-0.115084
Plate11	186	AAA	11	8	18	NA	YNL193W	47	14	199	4652	0.7265	17303	7086	17404	7170	47	13	212	5009	0.7928	17446	7244	17606	7336	48	14	201	4675	0.7716	17463	7199	17626	7325	48	13	205	4753	0.7854	16956	7087	17103	7228	-0.0430367	-0.0589941	-0.0551949	-0.0799711	-0.0295444	-0.0490388
Plate09	88	AAA	9	4	16	RSA3	YLR221C	7	114	121	NA	NA	5407	773	5387	755	7	113	NA	NA	NA	NA	NA	NA	NA	8	114	142	NA	NA	6283	1296	6070	1116	8	113	NA	NA	NA	NA	NA	NA	NA	-0.0375915	NA	-0.0612476	NA	-0.0164904	NA
Plate13	47	AAA	13	2	23	TGS1	YPL157W	67	52	112	2579	0.7783	12536	5890	12845	6039	67	51	162	3600	0.8443	12369	6509	12945	6783	68	52	167	3869	0.8801	13453	7043	13894	7356	68	51	175	4092	0.8198	14011	7511	14462	7727	0.00503884	-0.13855	-0.138137	-0.142552	0.0109769	-0.144027
Plate04	105	AAA	4	5	9	SRI1	YEL025C	41	32	152	3729	0.8525	13675	7429	14298	7776	41	31	163	3879	0.859	13778	7431	14391	7739	42	32	160	4084	0.8547	14114	7683	14706	7967	42	31	170	4191	0.8318	14219	7724	14906	7842	-0.11061	-0.0943353	-0.103802	-0.0615523	-0.0912949	-0.0807593
Plate11	104	AAA	11	5	8	NA	YMR265C	41	34	185	4203	0.8005	19955	8190	20390	8357	41	33	126	2775	0.864	17744	7443	18104	7655	42	34	198	4652	0.8128	20724	8539	21031	8704	42	33	197	4446	0.8016	19945	8211	20437	8385	-0.0373969	-0.0797779	-0.0535955	-0.0390474	-0.0332695	-0.0632507
Plate02	157	AAA	2	7	13	NA	YCL060C	13	72	158	3879	0.8548	22096	13269	22521	13400	13	71	154	3774	0.8525	22008	12870	22438	13772	14	72	163	3849	0.8424	22436	13197	22864	13833	14	71	160	3955	0.8656	21967	12968	22474	13492	-0.114944	-0.156552	-0.132641	-0.127181	-0.109168	-0.0748688
Plate06	36	AAA	6	2	12	FSH1	YHR049W	35	74	145	3748	0.8434	28833	16694	29209	16519	35	73	133	3464	0.8298	30307	17799	31429	18298	36	74	127	3223	0.8057	27613	16496	27973	17149	36	73	140	3582	0.8706	27630	16208	28781	16993	-0.0452922	-0.0750404	-0.162062	-0.106484	-0.0580357	-0.0720268
Plate11	80	AAA	11	4	8	IBD2	YNL164C	39	34	176	4058	0.7726	19572	8041	19901	8139	39	33	180	4068	0.8048	19193	7950	19621	8144	40	34	199	4675	0.8209	20181	8368	20344	8457	40	33	180	4159	0.7953	19259	7979	19563	8141	-0.0331491	-0.0542278	-0.0580686	-0.0579094	-0.0340601	-0.0454244
Plate12	223	AAA	12	10	7	DDP1	YOR163W	51	84	167	3629	0.8587	19975	8305	20408	8446	51	83	180	4178	0.8245	21172	8683	21531	8879	52	84	171	3911	0.8158	20437	8383	20860	8577	52	83	183	4170	0.8423	20505	8425	20904	8626	-0.0665379	-0.0488507	-0.0528263	-0.0570783	-0.0727765	-0.0425775
Plate11	86	AAA	11	4	14	NA	YNL157W	39	22	176	3983	0.8291	16846	6941	17042	7076	39	21	192	4392	0.7794	16591	6910	16802	6961	40	22	193	4436	0.7747	17087	7066	17293	7189	40	21	196	4492	0.7859	17154	7053	17441	7112	-0.0549015	-0.0523733	-0.0561405	-0.028344	-0.0392906	-0.0553356
Plate06	294	AAA	6	13	6	NA	YGR250C	57	86	144	3307	0.8416	12533	7068	12854	6919	57	85	118	2749	0.9053	11788	6494	12410	6500	58	86	131	3029	0.8437	12101	6646	12151	6634	58	85	112	2577	0.8725	11609	6006	12520	6162	-0.0850203	-0.0532147	-0.113137	0.0329684	-0.119398	-0.095972
Plate01	160	AAA	1	7	16	CLN3	YAL040C	13	18	196	4749	0.8056	12306	6470	12590	6752	13	17	193	4536	0.8533	12689	6729	12784	7004	14	18	183	4441	0.8355	12606	6726	12849	6961	14	17	202	4835	0.8058	12339	6439	12566	6665	-0.100641	-0.126895	-0.110789	-0.0859904	-0.0668047	-0.0744436
Plate12	87	AAA	12	4	15	NA	YOR105W	39	68	115	2631	0.7619	18081	7102	18305	7088	39	67	94	1894	0.7238	14615	6050	14268	6009	40	68	138	3030	0.7211	17570	6927	18033	6943	40	67	111	2404	0.7817	17085	6934	16625	6913	0.00316955	-0.150303	0.00878515	-0.108154	-0.0123941	-0.116944
Plate13	86	AAA	13	4	14	NA	YPL067C	71	70	164	4197	0.826	17111	8553	16771	8544	71	69	145	3656	0.8724	14658	7788	13880	7250	72	70	128	3517	0.8656	17638	8369	16642	8235	72	69	160	3790	0.7939	12552	7517	12958	7587	-0.0502209	-0.1202	-0.0123685	-0.287255	-0.0140901	-0.124666
Plate07	102	AAA	7	5	6	NA	YIL092W	41	134	123	2887	0.8613	16893	8251	17872	8410	41	133	125	2924	0.8216	16448	8041	17512	8373	42	134	132	3028	0.8839	16851	8188	17932	8441	42	133	132	2993	0.8737	16399	7972	17447	8200	-0.0505571	-0.0784591	-0.0496359	-0.0585726	-0.069212	-0.0794425
Plate10	36	AAA	10	2	12	LYS7	YMR038C	67	26	89	NA	NA	500	95	486	88	67	25	NA	NA	NA	NA	NA	NA	NA	68	26	76	2284	0.8356	8665	4358	8742	4554	68	25	92	NA	NA	678	240	665	199	0.0775253	NA	-0.168542	-0.18779	0.0969873	NA
Plate12	231	AAA	12	10	15	NA	YOR154W	51	68	152	3494	0.786	20199	8325	20457	8405	51	67	160	3603	0.8213	19731	8006	20141	8120	52	68	138	2961	0.7386	19412	7911	19740	8061	52	67	125	2871	0.8061	19467	8008	19762	8109	-0.0563335	-0.034428	-0.0556999	-0.0619577	-0.0588551	-0.0421944
Plate02	354	AAA	2	15	18	GBP2	YCL011C	29	62	189	4486	0.8067	17393	10100	17973	10115	29	61	198	4480	0.8227	17497	10096	18243	10325	30	62	185	4483	0.8511	19790	11170	20268	11309	30	61	197	4518	0.8332	18991	10743	19672	10685	-0.102568	-0.105978	-0.059249	-0.0319457	-0.118969	-0.109169
Plate03	218	AAA	3	10	2	DIN7	YDR263C	19	142	138	3205	0.8741	20881	8508	22121	8713	19	141	135	3092	0.8179	21130	8746	22446	8989	20	142	144	3401	0.8584	21572	8788	22545	9151	20	141	127	3000	0.8145	20155	8524	21320	8684	-0.0809235	-0.0902794	-0.102544	-0.142017	-0.0892909	-0.100389
Plate13	222	AAA	13	10	6	DBP1	YPL119C	83	86	140	3773	0.8274	24803	12734	24305	12720	83	85	157	3907	0.8352	26422	14620	26809	14212	84	86	114	3118	0.8721	29808	16054	29826	16160	84	85	107	2867	0.8275	34356	23087	35101	23846	-0.0223049	-0.0235548	-0.0359198	-0.320147	0.0127467	-0.0785073
Plate14	296	AAA	14	13	8	MED1	YPR070W	89	130	70	1794	0.8804	12584	6454	13377	6615	89	129	65	1605	0.9266	11245	5777	11548	5910	90	130	66	1664	0.887	12919	6586	13075	6701	90	129	60	1601	0.8534	13093	6610	13309	6765	-0.0999404	-0.176706	-0.152554	-0.137835	-0.10374	-0.122622
Plate06	358	AAA	6	15	22	TNA1	YGR260W	61	54	139	3266	0.8338	18336	10486	18668	10369	61	53	141	3206	0.8037	18044	10438	18485	10389	62	54	115	2657	0.7908	17955	9807	18727	10226	62	53	134	2943	0.799	18220	10326	19160	10380	-0.0772476	-0.0947531	-0.0533554	-0.0395118	-0.0913564	-0.109084
Plate14	45	AAA	14	2	21	ENO1	YGR254W	67	104	112	2487	0.824	13874	6879	14295	7097	67	103	138	3062	0.868	14520	7593	15453	7871	68	104	138	3007	0.8157	14301	7511	15030	7683	68	103	137	3029	0.8387	14902	7902	15347	7946	-0.0914272	-0.109574	-0.12012	-0.132917	-0.0429748	-0.108946
Plate02	235	AAA	2	10	19	RGT2	YDL138W	19	60	185	4193	0.8463	18216	10486	18876	10678	19	59	176	4161	0.8343	18432	10363	19039	10517	20	60	181	4235	0.8621	18373	10568	18773	10618	20	59	176	4194	0.8475	18229	10422	18936	10402	-0.0962047	-0.0627674	-0.0974602	-0.0569329	-0.0968981	-0.0628703
Plate06	53	AAA	6	3	5	NA	YHL005C	37	88	136	3257	0.8294	9820	5467	10188	5457	37	87	127	3148	0.8004	10911	5741	10823	5658	38	88	129	3173	0.8411	9678	5062	9909	4995	38	87	134	3240	0.8105	9127	4770	9468	4899	-0.117781	-0.0738529	-0.0413788	-0.0855261	-0.13934	-0.0451088
Plate01	292	AAA	1	13	4	OSH1	YAR044W	25	42	124	2758	0.7898	17159	9410	17979	10042	25	41	114	2619	0.841	16889	9166	17617	9808	26	42	128	2849	0.8668	17015	9283	17885	9774	26	41	122	2740	0.8638	17054	9249	17682	9986	-0.0924747	-0.0917971	-0.0639491	-0.110463	-0.0767904	-0.065008
Plate08	302	AAA	8	13	14	NA	YKL037W	25	70	113	2189	0.7133	22671	9312	23177	9385	25	69	142	2888	0.7517	23715	10201	23975	10241	26	70	126	2622	0.7848	23735	9746	24397	9741	26	69	142	2912	0.7372	24342	9909	24917	9959	-0.0439357	-0.105014	-0.0119972	-0.0076692	-0.0524272	-0.09832
Plate01	37	AAA	1	2	13	SHE3	YBR130C	3	24	182	4367	0.8148	16560	9123	16898	9393	3	23	189	4407	0.8313	16126	8748	16662	9117	4	24	196	4575	0.8459	16477	8725	16931	9077	4	23	194	4466	0.8847	16443	8982	16865	9385	-0.0972182	-0.0784271	-0.0479331	-0.0990614	-0.0884596	-0.0713848
Plate09	180	AAA	9	8	12	GSY2	YLR258W	15	122	213	4929	0.7906	29162	11604	29483	11682	15	121	204	4619	0.7516	29342	11715	29653	11694	16	122	221	4951	0.7931	29027	11524	29306	11561	16	121	217	4958	0.7821	29472	11759	29768	11763	-0.0608995	-0.0535466	-0.0558855	-0.0556761	-0.0481494	-0.0518023
Plate03	322	AAA	3	14	10	RTT103	YDR289C	27	126	111	2556	0.8208	19102	7368	20222	7587	27	125	129	2807	0.8886	16842	6561	16946	6446	28	126	121	2775	0.8611	18531	7213	18956	7314	28	125	120	2742	0.855	19883	7762	21104	7929	-0.0812346	-0.199314	-0.151741	-0.0568912	-0.0764566	-0.15565
Plate11	141	AAA	11	6	21	PUS4	YNL292W	43	8	190	4349	0.7738	15764	6439	16042	6547	43	7	193	4270	0.7583	15227	6210	15495	6314	44	8	181	4136	0.8225	15325	6357	15581	6475	44	7	187	4180	0.7795	15168	6255	15355	6411	-0.0339595	-0.0347292	-0.0616912	-0.0695308	-0.031453	-0.0325885
Plate03	143	AAA	3	6	23	NA	YDR336W	11	100	186	4051	0.8737	40471	26041	40876	25885	11	99	193	4179	0.8218	39782	24405	40256	24582	12	100	185	4030	0.7671	39979	25453	40419	27114	12	99	192	4012	0.8528	41053	27169	42651	28552	-0.114714	-0.0924764	-0.181815	-0.130015	-0.105269	-0.0720272
Plate06	146	AAA	6	7	2	TRX2	YGR209C	45	94	144	3101	0.8504	10391	5549	11009	5611	45	93	133	3042	0.8064	10759	5680	11079	5638	46	94	142	3098	0.855	10196	5485	10813	5698	46	93	139	3159	0.8624	10483	5686	10939	5716	-0.0364536	-0.0332378	-0.0847994	-0.0713157	-0.0732523	-0.051931
Plate03	130	AAA	3	6	10	CRF1	YDR223W	11	126	123	3064	0.8609	25706	11751	27346	12398	11	125	120	2876	0.875	24848	11461	26365	11846	12	126	129	3173	0.8549	25016	11504	26771	11842	12	125	132	3175	0.8755	26181	11954	27699	12270	-0.0931012	-0.109273	-0.0814733	-0.0587448	-0.0897049	-0.121997
Plate08	309	AAA	8	13	21	CTK1	YKL139W	25	56	114	2305	0.8226	20111	8055	20729	8306	25	55	103	2065	0.7622	19620	7817	20497	8033	26	56	115	2295	0.8016	20456	8090	21426	8410	26	55	114	2302	0.8506	19934	8026	20710	8288	-0.0586338	-0.0322333	-0.0231638	-0.057213	-0.0543319	-0.0543522
Plate02	211	AAA	2	9	19	NA	YCL076W	17	60	140	3196	0.8537	15764	8789	16668	8948	17	59	134	3103	0.8289	14400	7918	15032	7975	18	60	132	3067	0.8237	14920	8180	15627	8413	18	59	136	3195	0.8174	14717	8068	15032	8050	-0.0608321	-0.0736407	-0.082026	-0.0858429	-0.0870378	-0.0897102
Plate09	249	AAA	9	11	9	NA	YLR168C	21	128	217	4732	0.8264	29619	11808	30035	11834	21	127	222	4984	0.8152	29755	11906	30185	11940	22	128	197	4399	0.8166	29711	11802	30193	11843	22	127	204	4597	0.8092	29875	11941	30442	11903	-0.0502957	-0.0548832	-0.043351	-0.0377545	-0.0483362	-0.0526808
Plate13	292	AAA	13	13	4	BUD7	YOR299W	89	90	NA	NA	NA	NA	NA	NA	NA	89	89	188	4575	0.8725	16211	9599	16323	10175	90	90	133	3200	0.8311	16101	8431	16653	8685	90	89	102	2508	0.8268	19775	9559	21011	10115	NA	-0.32784	-0.083156	0.0666551	NA	-0.253075
Plate02	160	AAA	2	7	16	RGD1	YBR260C	13	66	174	4137	0.8366	22332	13241	23033	13789	13	65	178	4048	0.8342	21272	12724	22071	13194	14	66	176	4307	0.8328	23358	13650	24357	14031	14	65	190	4535	0.8511	22652	13283	23499	13777	-0.116853	-0.12657	-0.0513488	-0.0841005	-0.0898115	-0.112699
Plate01	75	AAA	1	4	3	SLI15	YBR156C	7	44	160	3690	0.8705	17055	9292	17496	9814	7	43	165	3639	0.8629	16942	9182	17512	9658	8	44	153	3663	0.8325	17824	9701	18005	10175	8	43	170	3728	0.8414	16690	9130	17295	9557	-0.103193	-0.0801295	-0.108041	-0.0850349	-0.0687969	-0.0626311
Plate03	65	AAA	3	3	17	RAD55	YDR076W	5	112	79	1966	0.8106	29235	14349	30957	14492	5	111	71	1731	0.8068	29502	15531	30865	16053	6	112	60	1549	0.8074	29133	14835	31751	15401	6	111	83	2049	0.7866	31226	15593	32616	15999	-0.0357856	-0.149469	-0.0539259	-0.0447771	-0.0791918	-0.148433
Plate02	257	AAA	2	11	17	CWH43	YCR017C	21	64	162	3976	0.8187	21161	12405	20443	13055	21	63	165	4084	0.8204	19999	11935	19685	12188	22	64	160	4102	0.8407	22322	12790	21675	13203	22	63	166	4148	0.8148	21190	12332	20642	12747	-0.233558	-0.203254	-0.156028	-0.18704	-0.0871036	-0.123698
Plate13	153	AAA	13	7	9	GRD19	YOR357C	77	80	140	3414	0.8446	15013	7928	15790	8222	77	79	128	3108	0.8892	15675	8209	16031	8520	78	80	170	4221	0.8346	18709	9904	19534	10376	78	79	86	2125	0.8581	14517	7533	14982	7838	-0.0909829	-0.115733	-0.0793647	-0.10736	-0.11199	-0.0928891
Plate03	122	AAA	3	6	2	RTN1	YDR233C	11	142	129	3017	0.8458	20458	8550	21629	8608	11	141	126	3066	0.8587	21441	9123	22577	9412	12	142	136	3219	0.8124	25055	10344	25684	10402	12	141	115	2600	0.9114	19622	8174	20960	8472	-0.106816	-0.131519	-0.0135155	-0.143981	-0.130462	-0.123281
Plate14	137	AAA	14	6	17	NA	YIL102C	75	112	150	3647	0.8457	23928	13142	24008	13301	75	111	149	3616	0.8781	22628	12631	23294	12887	76	112	158	3751	0.8307	25924	14371	26762	14558	76	111	157	3734	0.8482	24165	13361	24849	13700	-0.120652	-0.127332	-0.0636409	-0.104178	-0.0867601	-0.120867
Plate01	30	AAA	1	2	6	NA	YBR027C	3	38	182	4205	0.8152	17351	9568	17065	9779	3	37	180	4199	0.8368	17452	9613	17298	9933	4	38	178	4127	0.8703	18412	9827	17992	9968	4	37	169	4029	0.8638	17334	9507	17050	9757	-0.136612	-0.13694	-0.0813689	-0.134915	-0.0826117	-0.0801933
Plate09	109	AAA	9	5	13	AHP1	YLR109W	9	120	191	4329	0.7277	27936	10826	28279	10904	9	119	165	3673	0.7181	26392	10648	26931	10662	10	120	175	3758	0.7205	26192	10409	26706	10556	10	119	176	3887	0.7272	26876	10404	27461	10567	-0.0308171	-0.075206	-0.0745731	-0.0332274	-0.0190577	-0.083509
Plate01	304	AAA	1	13	16	PRM9	YAR031W	25	18	189	4575	0.8591	17484	9000	17803	9238	25	17	168	3904	0.8603	15465	8633	15740	8923	26	18	137	3188	0.8316	15683	8430	15915	8697	26	17	158	3663	0.882	15313	8427	15562	8597	0.00525596	-0.136536	-0.0848721	-0.103575	0.0125627	-0.116778
Plate01	185	AAA	1	8	17	NA	YBR174C	15	16	128	3114	0.83	12837	6793	13195	7065	15	15	129	2970	0.8881	12095	6369	12493	6675	16	16	131	3107	0.8044	12981	6834	13344	7079	16	15	129	3004	0.7938	12592	6618	13052	6905	-0.090233	-0.0969393	-0.0757364	-0.0758571	-0.0699313	-0.0713246
Plate07	131	AAA	7	6	11	BNA1	YJR025C	43	124	137	3460	0.8417	20959	10766	21331	11200	43	123	128	3218	0.855	20362	10359	21041	10713	44	124	132	3267	0.868	19743	10061	20411	10460	44	123	128	3251	0.8818	19712	10161	19950	10325	-0.115712	-0.0831364	-0.103493	-0.124936	-0.0590057	-0.0568853
Plate12	92	AAA	12	4	20	SLG1	YOR008C	39	58	148	3002	0.8645	17553	7116	18262	7331	39	57	115	2267	0.8272	16671	6711	17313	6836	40	58	129	2655	0.8828	17963	7152	18409	7270	40	57	126	2452	0.7653	17160	6918	17853	7065	-0.0464187	-0.0314937	-0.0228248	-0.0302896	-0.0600387	-0.0576276
Plate11	304	AAA	11	13	16	DIA1	YMR316W	57	18	205	4920	0.7938	17907	7378	18277	7539	57	17	204	4857	0.7827	17260	7128	17522	7331	58	18	197	4500	0.7873	17356	7183	17761	7366	58	17	202	4681	0.7811	17029	7022	17385	7202	-0.0440339	-0.0649657	-0.05212	-0.0509895	-0.0374012	-0.0416036
Plate14	235	AAA	14	10	19	MRPL10	YNL284C	83	108	160	3821	0.8225	28938	16255	30010	16750	83	107	160	3798	0.8411	28009	15979	29132	16604	84	108	163	3916	0.8882	28259	16417	28979	16572	84	107	152	3710	0.8585	28717	16509	29198	16753	-0.0552229	-0.0928021	-0.0989691	-0.100304	-0.0657621	-0.0954913
Plate09	287	AAA	9	12	23	RPS29A	YLR388W	23	100	178	3668	0.8163	26108	10268	26614	10489	23	99	185	3874	0.764	27672	10916	28048	10930	24	100	176	3742	0.7603	25900	10141	26675	10237	24	99	180	3883	0.776	26665	10493	27039	10618	-0.071271	-0.04659	-0.0349307	-0.0634781	-0.050945	-0.0448027
Plate13	122	AAA	13	6	2	NA	YPL095C	75	94	183	4265	0.8884	17618	9225	18272	9209	75	93	180	4256	0.8705	16455	9088	16913	9233	76	94	106	NA	NA	1141	311	1102	263	76	93	94	2390	0.8634	17481	8057	18288	8375	-0.0200218	-0.142037	-0.197263	0.109673	-0.071836	-0.156109
Plate06	150	AAA	6	7	6	NA	YGR207C	45	86	171	4228	0.8371	14151	7789	14859	7849	45	85	175	4340	0.8342	14993	8343	15680	8422	46	86	168	4135	0.8481	14366	7923	15170	8061	46	85	174	4351	0.8539	14466	8022	15006	8334	-0.0383974	-0.0538815	-0.0436865	-0.105863	-0.0699826	-0.0776507
Plate12	230	AAA	12	10	14	TOM6	YOR045W	51	70	193	4485	0.8009	22472	9379	22838	9501	51	69	178	4029	0.8439	21362	8942	21746	9027	52	70	185	4197	0.8015	22768	9364	23103	9487	52	69	186	4278	0.7912	22394	9368	22914	9591	-0.0433907	-0.054847	-0.0230013	-0.0501447	-0.0517225	-0.0678419
Plate12	33	AAA	12	2	9	ECM3	YOR092W	35	80	144	3099	0.7812	20249	8347	20489	8417	35	79	181	3897	0.7735	21232	8699	21500	8806	36	80	138	2971	0.803	19557	8014	19863	8097	36	79	151	3436	0.8456	20402	8352	20628	8449	-0.0558025	-0.040278	-0.0521039	-0.0503226	-0.0585973	-0.0406431
Plate14	163	AAA	14	7	19	TAZ1	YPR140W	77	108	166	4062	0.8864	25668	14752	26038	14848	77	107	153	3723	0.8504	25340	13989	26263	14796	78	108	154	3824	0.808	26236	14776	26556	15042	78	107	156	3801	0.8621	27312	15171	27738	15806	-0.132926	-0.114618	-0.11782	-0.110423	-0.129276	-0.0796471
Plate13	230	AAA	13	10	14	NA	YPL113C	83	70	151	3787	0.8889	18854	9468	19751	9989	83	69	63	1649	0.8531	15319	7796	14898	7957	84	70	184	4505	0.821	17704	9251	18411	9660	84	69	105	NA	NA	1126	303	1087	260	-0.0109373	-0.136297	-0.0731092	-0.209772	-0.00336621	-0.0583467
Plate11	306	AAA	11	13	18	NA	YMR316C-B	57	14	160	3785	0.7701	17478	7225	17687	7303	57	13	160	3578	0.8416	16866	6974	17048	7139	58	14	150	3360	0.8167	16829	6918	17085	7025	58	13	160	3568	0.81	16645	6850	17178	7003	-0.0458667	-0.0670078	-0.0409234	-0.0285208	-0.0426163	-0.0442827
Plate04	280	AAA	4	12	16	RPL23B	YER117W	55	18	147	3440	0.8415	18715	10101	19699	10334	55	17	148	3429	0.8042	19420	10588	20321	10679	56	18	144	3462	0.8311	19189	10383	19953	10416	56	17	146	3475	0.8428	18717	10191	19452	10210	-0.0437564	-0.0445812	-0.0361264	-0.0451954	-0.0745571	-0.0881347
Plate07	69	AAA	7	3	21	IST3	YIR005W	37	104	77	1898	0.9047	32400	18947	34164	19919	37	103	130	3076	0.8049	34813	21084	36780	22002	38	104	127	3142	0.8644	33840	20134	35654	20632	38	103	119	2911	0.8755	33857	19941	36057	20990	-0.0455128	-0.0439941	-0.017399	-0.0196677	-0.0631225	-0.0790216
Plate01	163	AAA	1	7	19	NA	YBL055C	13	12	179	4251	0.8197	17869	9651	17970	9981	13	11	166	4103	0.857	18217	10071	18135	10298	14	12	180	4234	0.8684	17433	9673	17441	10002	14	11	180	4304	0.8542	19244	10416	19441	10689	-0.085007	-0.113244	-0.133673	-0.0568501	-0.0496729	-0.0784328
Plate03	141	AAA	3	6	21	NA	YDR338C	11	104	193	4332	0.8549	31921	17501	33439	18062	11	103	189	4249	0.8062	33598	18378	34849	18132	12	104	180	4208	0.8243	32389	17668	33794	17654	12	103	169	3851	0.8521	34618	18501	35956	18800	-0.125543	-0.053194	-0.0823075	-0.0325713	-0.13323	-0.0914251
Plate02	61	AAA	2	3	13	HIS4	YCL030C	5	72	70	NA	NA	1571	289	1529	248	5	71	103	2765	0.8296	24612	17293	24758	17891	6	72	155	3465	0.8341	19883	12694	20186	13003	6	71	117	NA	NA	1715	533	1560	410	0.369062	-0.342359	-0.248284	-0.168428	0.369303	-0.292007
Plate02	214	AAA	2	9	22	BIT2	YBR270C	17	54	164	3948	0.844	15761	8755	15871	8522	17	53	154	3521	0.8247	14154	7948	14646	7931	18	54	148	3505	0.8556	15988	8668	15960	8546	18	53	155	3628	0.8929	14900	8107	15393	8160	-0.0743679	-0.107593	-0.0692124	-0.0660173	-0.0821853	-0.12162
Plate09	59	AAA	9	3	11	GIS3	YLR094C	5	124	203	4401	0.7596	27380	10839	27641	10891	5	123	197	4660	0.8057	28199	11141	28257	11195	6	124	218	4935	0.8068	28137	11152	28160	11278	6	123	203	4618	0.7306	27922	10999	28085	11037	-0.0641076	-0.0677502	-0.0830334	-0.0577875	-0.051394	-0.0437609
Plate11	285	AAA	11	12	21	THI12	YNL332W	55	8	178	4002	0.7678	16219	6644	16499	6764	55	7	180	4148	0.8105	16019	6590	16342	6783	56	8	165	3757	0.8182	16029	6624	16318	6774	56	7	183	4073	0.7324	15888	6526	16194	6691	-0.0384311	-0.0564726	-0.0567624	-0.0506212	-0.033284	-0.04015
Plate07	186	AAA	7	8	18	NA	YJL147C	47	110	98	2461	0.8318	27551	15325	29466	15898	47	109	103	2528	0.7799	27865	15457	28409	15696	48	110	99	2412	0.8258	26578	14902	27753	15336	48	109	102	2561	0.7175	28537	16044	29513	16650	-0.0147877	-0.0595386	-0.0696425	-0.0689389	-0.0613859	-0.0537405
Plate01	113	AAA	1	5	17	FUI1	YBL042C	9	16	191	4468	0.8567	15847	8463	16404	8546	9	15	192	4712	0.7983	16696	8936	17002	9347	10	16	193	4641	0.8581	16179	8772	16557	9061	10	15	168	4039	0.8373	16263	8922	16537	9362	-0.0148087	-0.0811733	-0.0797812	-0.125842	-0.0525486	-0.0477294
Plate13	78	AAA	13	4	6	NA	YPL071C	71	86	68	1535	0.84	10443	5233	10959	5439	71	85	173	4048	0.8612	17036	8742	17945	8974	72	86	68	1549	0.9014	10227	5084	10743	5288	72	85	NA	140	0.7756	NA	NA	NA	NA	-0.101767	-0.012748	-0.0952652	NA	-0.112829	-0.0504131
Plate11	357	AAA	11	15	21	MLS1	YNL117W	61	8	139	3086	0.7348	15277	6236	15581	6416	61	7	172	3800	0.7619	15960	6617	16282	6843	62	8	176	3839	0.7763	16589	6779	16812	6894	62	7	183	3973	0.8142	16405	6777	16793	6936	-0.0488823	-0.0743318	-0.0377757	-0.0480519	-0.0334982	-0.0513573
Plate08	267	AAA	8	12	3	HSP104	YLL026W	23	92	157	3364	0.854	26292	11209	26900	11316	23	91	142	3088	0.7806	25091	10594	25463	10543	24	92	169	3689	0.7952	27505	11530	28571	11730	24	91	171	3687	0.8149	27076	11786	27678	11827	-0.0516158	-0.0475801	-0.00092745	-0.0625207	-0.0529397	-0.0563936
Plate11	287	AAA	11	12	23	RPD3	YNL330C	55	4	179	4096	0.8244	15199	6327	15272	6390	55	3	176	3962	0.8297	14915	5994	15048	6063	56	4	148	3199	0.8371	14277	5667	14442	5703	56	3	162	3579	0.7726	14879	6256	15065	6344	-0.0730243	-0.0221209	-1.75e-05	-0.0833141	-0.0613078	-0.0146039
Plate01	52	AAA	1	3	4	NTG1	YAL015C	5	42	165	3871	0.8455	17337	9541	17617	9793	5	41	168	4011	0.8204	17112	9243	17282	9636	6	42	164	3863	0.8555	17447	9543	17831	9810	6	41	167	4006	0.8408	17269	9273	17620	9599	-0.089728	-0.0973195	-0.0735563	-0.0624172	-0.0799808	-0.0565055
Plate12	78	AAA	12	4	6	RTS1	YOR014W	39	86	106	1963	0.7565	11950	4709	12084	4814	39	85	107	1943	0.655	11775	4527	11837	4638	40	86	115	2171	0.7369	12541	4796	12843	4896	40	85	129	2622	0.7822	13438	4972	13842	5047	-0.114415	-0.0984932	-0.0407228	0.0362365	-0.0978381	-0.0699823
Plate12	279	AAA	12	12	15	YRM1	YOR172W	55	68	175	3842	0.8079	21105	8547	21546	8724	55	67	123	2685	0.7473	19537	8094	20066	8316	56	68	147	3240	0.8075	20566	8488	21096	8657	56	67	138	3062	0.8148	20390	8307	20951	8492	-0.0246225	-0.0720755	-0.047531	-0.0328379	-0.0263974	-0.0721258
Plate08	252	AAA	8	11	12	NA	YKL023W	21	74	195	4339	0.7668	25609	10877	25836	10955	21	73	196	4120	0.806	25426	10856	25944	11002	22	74	194	4348	0.7974	26187	10953	26751	11071	22	73	193	4263	0.7618	25937	10892	26290	10959	-0.0741698	-0.0730639	-0.0322995	-0.0468943	-0.0571755	-0.0662644
Plate13	259	AAA	13	11	19	FIT2	YOR382W	85	60	176	4206	0.8246	18058	9199	19022	9359	85	59	85	NA	NA	1050	275	1019	222	86	60	163	3995	0.8599	18131	9160	19204	9543	86	59	139	3341	0.8631	15664	7934	15851	7894	0.0197488	-0.159223	0.00796717	-0.0301791	-0.030263	-0.258719
Plate06	152	AAA	6	7	8	NA	YGR206W	45	82	108	3197	0.8864	19615	10902	19606	11157	45	81	102	3045	0.8331	19488	11099	19510	11208	46	82	102	2918	0.8764	18832	10664	19241	10806	46	81	103	2966	0.8578	18537	10572	18622	10755	-0.104453	-0.118137	-0.0886432	-0.131357	-0.0441253	-0.0786839
Plate03	170	AAA	3	8	2	BTT1	YDR252W	15	142	151	3379	0.8554	20478	8300	21211	8361	15	141	142	3261	0.8943	21205	8682	22367	8682	16	142	135	3049	0.8369	20393	8272	21812	8354	16	141	140	3238	0.8669	20922	8588	22051	8618	-0.108179	-0.0574472	-0.0582047	-0.0741542	-0.0945775	-0.0858047
Plate09	35	AAA	9	2	11	NA	YLR326W	3	124	217	4724	0.6962	27973	11119	28239	11183	3	123	202	4620	0.8062	27883	11147	28302	11261	4	124	187	4245	0.7814	27282	10574	27624	10670	4	123	197	4502	0.72	27667	10901	27810	10985	-0.0672674	-0.0733028	-0.0372856	-0.0664299	-0.0533418	-0.0616778
Plate02	335	AAA	2	14	23	DLD1	YDL174C	27	52	178	4140	0.8748	15865	8779	16246	9173	27	51	183	4290	0.8876	16338	8999	16671	9209	28	52	179	4117	0.8699	15302	8487	15636	8682	28	51	184	4278	0.8174	15044	8310	15382	8583	-0.133766	-0.0981775	-0.122223	-0.13311	-0.0755822	-0.0627567
Plate02	26	AAA	2	2	2	NA	YCR076C	3	94	193	4041	0.83	37328	24752	38109	25274	3	93	208	4294	0.8357	35598	22529	36658	22857	4	94	199	4123	0.7895	36643	23368	37696	23808	4	93	202	4341	0.8964	36506	23578	37498	24311	-0.100311	-0.0339428	-0.0413642	-0.0765796	-0.108005	-0.0602787
Plate06	170	AAA	6	8	2	TOM71	YHR117W	47	94	140	3143	0.846	11401	6060	12209	6257	47	93	132	3081	0.8609	11293	6125	12055	6299	48	94	135	3092	0.8846	11490	6195	11990	6177	48	93	135	3066	0.8146	11216	6061	12024	6215	-0.0261971	-0.0546535	-0.0362943	-0.0403157	-0.0520468	-0.081082
Plate10	258	AAA	10	11	18	NA	YML010C-B	85	14	191	4863	0.8545	8836	4564	9141	4800	85	13	130	3247	0.8974	8712	4202	9217	4422	86	14	147	3935	0.8714	8779	4312	8911	4454	86	13	157	4399	0.865	10865	5463	10739	5497	-0.170484	-0.0474613	-0.109185	-0.104383	-0.146051	-0.0546786
Plate03	132	AAA	3	6	12	NA	YDR222W	11	122	143	3342	0.8653	26176	12225	28096	12680	11	121	147	3409	0.8596	27044	12580	28700	12529	12	122	133	3246	0.8494	25876	11947	27563	12165	12	121	148	3433	0.8229	26362	12320	27841	12772	-0.0686169	-0.0172765	-0.0582985	-0.0928849	-0.101345	-0.0748471
Plate03	99	AAA	3	5	3	NA	YDR102C	9	140	123	2994	0.8218	22396	9556	22728	9753	9	139	120	3054	0.8421	23354	9994	24430	10025	10	140	126	3027	0.8857	22597	9623	24067	9716	10	139	122	2942	0.8637	23058	9983	24814	10282	-0.15947	-0.0619144	-0.0537802	-0.0621483	-0.100038	-0.0773914
Plate01	156	AAA	1	7	12	NA	YAL043C-A	13	26	142	3220	0.7786	14148	7513	15141	7827	13	25	128	3008	0.8872	14242	7478	14987	7735	14	26	114	2685	0.8114	14168	7540	14979	7925	14	25	142	3243	0.8524	14105	7571	15080	7991	-0.0184925	-0.0181276	-0.0518146	-0.0527614	-0.0612095	-0.0447803
Plate09	213	AAA	9	9	21	CKI1	YLR133W	17	104	223	4996	0.8196	28501	11347	28943	11373	17	103	208	4872	0.7609	28176	11117	28581	11228	18	104	199	4317	0.7773	27531	10801	27879	10824	18	103	194	4225	0.7976	27748	10946	28209	10902	-0.0525751	-0.0543372	-0.0426255	-0.0343582	-0.0524809	-0.0420705
Plate02	304	AAA	2	13	16	MAL33	YBR297W	25	66	180	4494	0.8493	22317	13048	22612	13397	25	65	190	4538	0.856	21757	12584	22301	12923	26	66	184	4373	0.8583	20679	12068	21245	12647	26	65	192	4422	0.8662	20627	12005	21357	12144	-0.108284	-0.0830773	-0.131333	-0.0699352	-0.0713684	-0.0629006
Plate07	205	AAA	7	9	13	NA	YJL021C	49	120	133	3026	0.839	18832	9486	20038	9765	49	119	129	3043	0.8294	19575	9789	20732	10058	50	120	123	2790	0.8237	18228	9108	19627	9346	50	119	124	2930	0.8379	19256	9659	20645	10046	-0.0484776	-0.0291979	-0.0280441	-0.0346308	-0.0713352	-0.0487569
Plate10	256	AAA	10	11	16	NA	YML011C	85	18	NA	NA	NA	NA	NA	NA	NA	85	17	160	4497	0.8926	14009	6526	13583	6522	86	18	105	2384	0.8644	6282	3347	6492	3440	86	17	NA	NA	NA	NA	NA	NA	NA	NA	0.028311	-0.249894	NA	NA	0.0664753
Plate03	160	AAA	3	7	16	HBT1	YDL223C	13	114	86	NA	NA	2034	538	1968	435	13	113	158	3816	0.8191	31595	15639	33516	16047	14	114	129	3265	0.824	34852	16883	36165	17285	14	113	88	2219	0.8371	29221	12847	30386	13143	-0.332891	0.00206438	0.0649108	0.0345765	-0.436147	-0.0318304
Plate01	87	AAA	1	4	15	MRPS9	YBR146W	7	20	174	4089	0.8482	13108	6933	13550	7277	7	19	171	4094	0.8279	12494	6533	12965	6926	8	20	168	4169	0.8905	13266	7028	13502	7311	8	19	175	4104	0.8002	12395	6451	12744	6772	-0.0896884	-0.0902058	-0.101436	-0.0860418	-0.066391	-0.0572117
Plate09	230	AAA	9	10	14	NA	YLR269C	19	118	179	4008	0.7935	27595	10789	28112	10840	19	117	191	4273	0.7752	27361	10765	27909	10720	20	118	189	4088	0.7773	26891	10738	27381	10835	20	117	179	3898	0.7962	27249	10633	27578	10518	-0.0318938	-0.0278982	-0.0715926	-0.0204238	-0.0331666	-0.0431571
Plate01	196	AAA	1	9	4	NA	YAL065C	17	42	162	3702	0.8628	18180	10202	18456	10726	17	41	182	4197	0.8109	18331	10019	18652	10540	18	42	187	4238	0.8497	18679	10065	19197	10488	18	41	186	4222	0.8309	18108	9738	18528	10278	-0.141331	-0.101491	-0.0506063	-0.0777249	-0.0991451	-0.06188
Plate09	40	AAA	9	2	16	HRD3	YLR207W	3	114	209	4727	0.8117	27415	10911	27717	10949	3	113	223	5113	0.7494	28324	11159	28493	11175	4	114	211	4787	0.7386	27429	10838	27551	10853	4	113	205	4546	0.8134	27939	10906	28137	10844	-0.0671044	-0.0526186	-0.064364	-0.0310342	-0.0584306	-0.0392157
Plate09	142	AAA	9	6	22	NA	YLR235C	11	102	162	3375	0.7854	24845	9611	25493	9800	11	101	139	2912	0.7702	24177	9387	24915	9506	12	102	149	3084	0.7366	24310	9421	25087	9608	12	101	140	2919	0.8932	23653	9121	24584	9292	-0.0459673	-0.0404321	-0.0441454	-0.030532	-0.0381103	-0.0484388
Plate03	61	AAA	3	3	13	VPS41	YDR080W	5	120	56	1551	0.8499	28133	13206	30052	13397	5	119	45	989	0.8423	NA	6906	NA	7271	6	120	50	1327	0.8594	NA	10202	NA	10468	6	119	53	1515	0.8219	26030	12350	26865	12781	-0.00597391	NA	NA	-0.158032	-0.0576772	NA
Plate14	358	AAA	14	15	22	OPY2	YPR075C	93	102	136	3144	0.8737	30909	18019	31451	18224	93	101	132	3045	0.8377	30814	17801	31346	18269	94	102	133	3071	0.8072	28907	16188	30242	16865	94	101	133	3060	0.8606	29801	17428	30078	17688	-0.0822885	-0.0908603	-0.051133	-0.119249	-0.0919982	-0.0814944
Plate12	37	AAA	12	2	13	PTC5	YOR090C	35	72	124	2644	0.662	18409	7461	18175	7527	35	71	81	1264	0.5984	NA	5485	NA	5386	36	72	123	2525	0.7632	17177	7136	17234	7175	36	71	125	2803	0.7711	17944	6942	17938	6834	-0.089594	NA	-0.104896	0.0225092	-0.0523455	NA
Plate13	350	AAA	13	15	14	CPA1	YOR303W	93	70	78	NA	NA	1157	247	1132	204	93	69	NA	NA	NA	NA	NA	NA	NA	94	70	57	NA	NA	912	204	872	164	94	69	NA	NA	NA	NA	NA	NA	NA	0.122441	NA	-0.132768	NA	0.0323668	NA
Plate10	338	AAA	10	15	2	GAL80	YML051W	93	46	136	3610	0.863	13123	6656	12744	6712	93	45	75	2305	0.8305	15318	7903	15112	8313	94	46	133	3403	0.835	12393	6539	12360	6626	94	45	149	3942	0.8313	12904	6741	13186	6757	-0.108622	-0.132547	-0.138518	-0.0649761	-0.0598125	-0.0587824
Plate03	359	AAA	3	15	23	SAC3	YDR159W	29	100	119	2654	0.8603	38883	23806	40840	24418	29	99	165	3540	0.8359	43305	29474	45260	29693	30	100	132	2998	0.7449	41412	26160	43164	26469	30	99	137	2939	0.7508	41681	27381	43729	28627	-0.0585805	-0.054351	-0.0331351	-0.0848514	-0.0895519	-0.100796
Plate09	235	AAA	9	10	19	STP3	YLR375W	19	108	201	4562	0.7715	28104	11087	28493	11099	19	107	206	4587	0.7549	27976	11053	28357	11147	20	108	211	4771	0.7898	27876	10988	28252	11045	20	107	192	4264	0.6786	27479	10816	27887	10846	-0.0433512	-0.0565194	-0.0497088	-0.0449382	-0.0422958	-0.0450808
Plate06	142	AAA	6	6	22	NAM8	YHR086W	43	54	96	2524	0.8485	27577	15866	29173	16747	43	53	167	4101	0.7966	31546	19007	31986	18916	44	54	149	3480	0.8234	25544	14915	26691	14861	44	53	128	3074	0.8282	25729	14452	27308	14708	-0.0660004	-0.0940364	-0.0357078	0.0129973	-0.054326	-0.102843
Plate03	247	AAA	3	11	7	MKC7	YDR144C	21	132	122	2905	0.8227	21976	9419	23607	9947	21	131	136	3336	0.8314	23430	10101	24906	10510	22	132	125	2914	0.8743	22153	9472	23363	9923	22	131	133	3303	0.8525	24217	10287	25237	10768	-0.114127	-0.0797513	-0.129877	-0.0829206	-0.116707	-0.0837062
Plate02	308	AAA	2	13	20	PCA1	YBR295W	25	58	160	3916	0.869	19151	11002	19730	11291	25	57	173	4097	0.8341	18656	10513	19143	10846	26	58	170	4216	0.8607	19198	11062	19810	11595	26	57	184	4440	0.8812	19322	10949	19856	11357	-0.0995529	-0.0944907	-0.127973	-0.0971564	-0.0828982	-0.063171
Plate08	59	AAA	8	3	11	NA	YKL069W	5	76	163	3429	0.8172	22647	9292	23265	9384	5	75	164	3483	0.81	22765	9325	23167	9490	6	76	170	3654	0.802	23461	9674	24030	9728	6	75	162	3557	0.7789	23618	9658	24190	9870	-0.0378305	-0.0592024	-0.0341055	-0.0426574	-0.0513349	-0.0476388
Plate03	64	AAA	3	3	16	PPH22	YDL188C	5	114	117	2811	0.8013	26290	12136	27534	12598	5	113	132	2952	0.8617	25470	11804	27289	11873	6	114	121	3086	0.7906	27462	12699	28294	12857	6	113	129	3033	0.8253	26710	12590	28339	12828	-0.0980666	-0.049887	-0.0708988	-0.0655917	-0.0855309	-0.111067
Plate14	67	AAA	14	3	19	NA	YPR098C	69	108	161	3788	0.8389	21012	11211	21591	11130	69	107	153	3622	0.8822	21196	11397	21701	11826	70	108	162	3781	0.8449	21237	11527	22009	12033	70	107	153	3615	0.9116	20665	11026	21667	11124	-0.0541642	-0.126285	-0.126954	-0.047961	-0.0755989	-0.0843184
Plate03	182	AAA	3	8	14	MNN10	YDR245W	15	118	98	2662	0.8527	28950	14380	29894	14848	15	117	98	2570	0.8302	29151	14302	30493	14882	16	118	103	2806	0.8508	29674	14605	30184	15202	16	117	98	2546	0.767	28948	14365	29994	14864	-0.125261	-0.0915238	-0.132677	-0.120321	-0.0991627	-0.0808064
Plate07	228	AAA	7	10	12	JJJ2	YJL162C	51	122	125	3019	0.8003	18715	9355	19620	9648	51	121	133	3126	0.858	18899	9475	20122	9709	52	122	135	3206	0.8453	19071	9489	20207	9808	52	121	137	3167	0.8506	19054	9553	20404	9841	-0.0681487	-0.0344601	-0.0401276	-0.0283469	-0.0637247	-0.0641262
Plate06	103	AAA	6	5	7	NA	YHL017W	41	84	117	2927	0.8355	13044	7094	13778	7341	41	83	113	2775	0.8366	12996	7067	13929	7413	42	84	122	3003	0.8737	12644	6845	13531	6968	42	83	124	2977	0.9088	12927	7072	13929	7367	-0.060807	-0.0576929	-0.0167705	-0.0491543	-0.0640878	-0.0644084
Plate09	46	AAA	9	2	22	YKE2	YLR200W	3	102	190	4095	0.7387	26546	10497	26651	10566	3	101	180	3789	0.7633	26395	10304	26741	10374	4	102	176	3750	0.8439	25832	9959	26082	10041	4	101	185	3953	0.7244	26001	10207	26374	10274	-0.079016	-0.0490777	-0.0434421	-0.0572328	-0.0552621	-0.0389065
Plate11	345	AAA	11	15	9	ESBP6	YNL125C	61	32	179	4077	0.8163	19916	8207	20075	8352	61	31	180	3952	0.751	19530	8033	19900	8178	62	32	193	4351	0.7556	20165	8282	20437	8488	62	31	176	3738	0.7648	19675	8086	20054	8293	-0.0585982	-0.0402104	-0.0569919	-0.0496932	-0.0390858	-0.0356747
Plate01	136	AAA	1	6	16	REG2	YBR050C	11	18	137	3165	0.8126	13465	6992	13970	7345	11	17	133	3051	0.8553	13133	6949	13739	7294	12	18	138	3307	0.8021	13808	7344	14369	7647	12	17	142	3191	0.8524	12989	6841	13708	7154	-0.0555887	-0.0716574	-0.0670928	-0.0488456	-0.0374124	-0.0666781
Plate10	172	AAA	10	8	4	NA	YMR102C	79	42	196	4840	0.8468	8157	4233	8166	4148	79	41	103	294	0.7449	NA	252	NA	211	80	42	41	896	0.7558	NA	765	NA	832	80	41	155	4036	0.8327	11419	5465	11398	5464	-0.14804	NA	NA	-0.00447957	-0.164755	NA
Plate09	113	AAA	9	5	17	REX3	YLR107W	9	112	186	4107	0.8041	27983	10982	28508	10947	9	111	183	4053	0.8235	27510	10823	27919	10715	10	112	196	4449	0.791	28504	11274	28756	11330	10	111	193	4261	0.779	27696	10940	28070	10916	-0.0238278	-0.0267178	-0.0573112	-0.0436529	-0.0359362	-0.0421514
Plate06	153	AAA	6	7	9	WSC4	YHL028W	45	80	115	2814	0.8939	12952	7034	13636	7451	45	79	111	2809	0.8789	13411	7252	14235	7571	46	80	115	2785	0.8261	12475	6840	13234	7103	46	79	118	2934	0.8642	13442	7334	14255	7716	-0.0968884	-0.0537539	-0.0766958	-0.0776751	-0.0630921	-0.0525337
Plate12	235	AAA	12	10	19	NA	YOR152C	51	60	137	3089	0.7246	21145	8797	21038	8800	51	59	157	3608	0.8098	21969	9014	21763	9046	52	60	145	3168	0.7383	21434	8809	21752	8898	52	59	161	3618	0.8052	21294	8741	21525	8840	-0.073467	-0.0563636	-0.0355737	-0.043512	-0.0619514	-0.0348624
Plate02	139	AAA	2	6	19	NA	YDL114W	11	60	169	3946	0.8436	21305	12335	21595	12925	11	59	163	3894	0.8358	21817	12593	22071	13171	12	60	161	3808	0.8637	20910	12237	21118	12824	12	59	160	3762	0.8716	20752	11977	20879	12154	-0.134022	-0.124289	-0.158975	-0.106718	-0.0690277	-0.0595617
Plate13	301	AAA	13	13	13	ECM23	YPL021W	89	72	99	2812	0.806	28694	15117	28912	15468	89	71	81	259	0.5282	NA	201	NA	167	90	72	124	3196	0.8454	24390	15220	25069	15679	90	71	58	1716	0.7872	19817	9926	19589	10242	-0.023712	NA	-0.259537	-0.057442	0.00186968	NA
Plate14	143	AAA	14	6	23	NA	YMR074C	75	100	133	3019	0.8577	15533	8038	16175	8148	75	99	136	3168	0.8613	16018	8128	16783	8285	76	100	137	3128	0.8949	17512	9222	18324	9346	76	99	136	3127	0.8379	15585	8169	16138	8373	-0.0852794	-0.0505486	-0.0760335	-0.125297	-0.0843243	-0.0527983
Plate03	118	AAA	3	5	22	MGT1	YDL200C	9	102	168	3874	0.8293	38668	23210	39437	23612	9	101	143	3241	0.8868	38278	24109	38996	24328	10	102	99	2355	0.7911	36081	19348	37379	19538	10	101	91	2106	0.8575	37409	22891	38223	23218	-0.0911378	-0.1422	0.000110118	-0.133137	-0.0740676	-0.131713
Plate03	215	AAA	3	9	23	NA	YDR119W	17	100	193	4305	0.791	41331	26599	41179	26455	17	99	201	4305	0.8237	40758	25536	40768	26095	18	100	189	4128	0.8359	40458	25572	40711	26544	18	99	198	4216	0.7619	42253	27952	42152	28597	-0.122178	-0.127715	-0.147204	-0.154029	-0.0869574	-0.0722922
Plate10	176	AAA	10	8	8	MUB1	YMR100W	79	34	97	2835	0.8418	12017	5998	12070	6140	79	33	63	1794	0.8465	9356	4713	9553	4978	80	34	77	2205	0.8743	10591	5405	10809	5529	80	33	96	2880	0.8583	12833	6552	13146	6623	-0.0728588	-0.151481	-0.102167	-0.0427797	-0.0516692	-0.103006
Plate03	164	AAA	3	7	20	DTD1	YDL219W	13	106	130	3014	0.799	29479	14465	31094	14446	13	105	134	3059	0.8053	29187	14618	30735	14997	14	106	144	3269	0.8338	30323	15276	32003	14974	14	105	134	3054	0.7962	29262	14441	30408	14388	-0.0243581	-0.0852656	-0.00977417	-0.0607275	-0.0729648	-0.102303
Plate10	194	AAA	10	9	2	YAP1	YML007W	81	46	157	3787	0.865	7928	3914	8248	4023	81	45	122	3070	0.8381	8344	4233	8610	4352	82	46	146	3334	0.8327	7298	3363	7340	3267	82	45	144	3492	0.8576	7489	3608	7808	3707	-0.0915079	-0.130999	0.00865304	-0.0659976	-0.101023	-0.130309
Plate09	353	AAA	9	15	17	MDL1	YLR188W	29	112	176	3675	0.783	28852	11424	29585	11406	29	111	163	3376	0.8266	28515	11180	29182	11157	30	112	171	3649	0.8226	29112	11545	29647	11379	30	111	171	3597	0.8199	29041	11538	29763	11392	-0.0230688	-0.0139534	-0.0166519	-0.012256	-0.0430667	-0.0315338
Plate07	233	AAA	7	10	17	NA	YJR054W	51	112	79	2023	0.8709	37703	28881	39402	29114	51	111	47	NA	NA	1324	267	1256	254	52	112	77	NA	NA	1275	245	1245	223	52	111	82	NA	NA	1049	183	1038	170	-0.269565	-0.109423	0.0308162	0.0429126	-0.339603	0.0131929
Plate04	81	AAA	4	4	9	RAD24	YER173W	39	32	146	3462	0.8476	13425	7332	14178	7548	39	31	99	2430	0.8466	12193	6246	13043	6669	40	32	150	3661	0.8045	13688	7508	14495	7724	40	31	153	3702	0.8414	14701	7887	15578	8053	-0.080748	-0.0273732	-0.0810239	-0.0345847	-0.0993585	-0.0103194
Plate12	171	AAA	12	8	3	ARP8	YOR141C	47	92	163	3827	0.7911	20205	8718	20238	8999	47	91	183	4466	0.8154	20131	8116	20191	8189	48	92	169	NA	NA	5099	1193	4931	1059	48	91	179	4426	0.7944	22781	9287	23265	9558	-0.163668	-0.0418964	0.0142884	-0.0213085	-0.120318	-0.0297877
Plate07	238	AAA	7	10	22	FAR1	YJL157C	51	102	133	3165	0.8244	23961	12998	24994	13180	51	101	138	3246	0.8297	25230	13515	26171	13437	52	102	136	3295	0.8229	24485	13088	25553	13303	52	101	135	3110	0.8017	23504	12390	24455	12830	-0.0558823	-0.00374793	-0.0308381	-0.0586159	-0.0805607	-0.0460501
Plate07	110	AAA	7	5	14	NA	YIL087C	41	118	135	3094	0.822	19690	10054	21059	10541	41	117	135	3170	0.8332	20182	10241	21316	10582	42	118	135	3220	0.83	19745	9986	20945	10372	42	117	141	3242	0.8633	20753	10489	22164	10709	-0.0616569	-0.0465145	-0.050536	0.00290351	-0.0732037	-0.0567057
Plate11	152	AAA	11	7	8	CAT8	YMR280C	45	34	150	3362	0.778	18682	7667	18926	7831	45	33	168	3769	0.7709	18194	7472	18779	7609	46	34	168	3894	0.775	19841	8150	20022	8225	46	33	152	3415	0.7891	18624	7693	18901	7773	-0.0487556	-0.0183129	-0.0399035	-0.0398749	-0.0315775	-0.0325834
Plate10	147	AAA	10	7	3	CAC2	YML102W	77	44	152	3583	0.7719	7572	3572	8007	3756	77	43	173	4047	0.8753	7349	3555	7674	3602	78	44	166	4009	0.8488	6818	3453	7016	3509	78	43	125	3009	0.8617	7284	3391	7706	3593	-0.044876	-0.0540465	-0.156995	-0.0442703	-0.0459488	-0.0848612
Plate06	52	AAA	6	3	4	ATF2	YGR177C	37	90	167	3947	0.852	15454	8643	16132	8650	37	89	164	3973	0.8259	16174	8883	16624	9265	38	90	161	3827	0.8342	15334	8440	16073	8742	38	89	158	3880	0.8082	15863	8775	16467	9059	-0.0477225	-0.0969627	-0.0678132	-0.0803183	-0.0808823	-0.0502564
Plate06	224	AAA	6	10	8	NA	YHR130C	51	82	126	2990	0.8631	12715	6981	13304	7162	51	81	122	3023	0.8513	13063	7081	13732	7353	52	82	129	3188	0.8343	13533	7341	14230	7499	52	81	133	3187	0.8645	13362	7249	14298	7356	-0.0800202	-0.0681104	-0.0411692	-0.00753313	-0.080591	-0.059367
Plate14	334	AAA	14	14	22	RIM15	YFL033C	91	102	162	3808	0.845	27221	15093	27289	15287	91	101	155	3612	0.8486	27144	14956	27539	15401	92	102	156	3649	0.8663	24912	14076	25715	14518	92	101	159	3721	0.8482	27086	15135	27944	15682	-0.0944684	-0.0891713	-0.124134	-0.0884696	-0.0664868	-0.0590631
Plate07	115	AAA	7	5	19	GIF1	YIR024C	41	108	162	3842	0.8327	28168	15582	29415	16163	41	107	164	3853	0.8508	28880	16320	30195	16753	42	108	162	3916	0.8429	28011	15444	29301	15985	42	107	169	3962	0.858	28325	16057	29446	16665	-0.0379766	-0.0386469	-0.0307962	-0.0738112	-0.0462723	-0.063786
Plate13	204	AAA	13	9	12	PNT1	YOR266W	81	74	98	2463	0.7733	21260	11647	21721	11266	81	73	126	3017	0.8572	19480	9990	20729	10199	82	74	134	3237	0.8828	20846	11270	22238	11628	82	73	164	3772	0.8436	20020	10896	21694	11017	-0.0288645	0.0347767	-0.0359416	-0.000402014	-0.101199	-0.0262458
Plate09	266	AAA	9	12	2	NA	YLR294C	23	142	202	4187	0.7847	32514	13074	33115	13271	23	141	198	3963	0.7424	31701	12720	32702	12993	24	142	204	4133	0.7186	32350	12891	33144	13228	24	141	173	3504	0.734	31736	12597	32719	12841	-0.0590041	-0.0489382	-0.0532237	-0.0320151	-0.0468527	-0.0473421
Plate07	274	AAA	7	12	10	NA	YJL181W	55	126	167	4007	0.8525	21479	11163	22458	11607	55	125	161	3882	0.8743	21220	11023	22133	11216	56	126	160	3905	0.8965	21391	10764	22584	11222	56	125	166	4115	0.8464	22053	11574	22977	11884	-0.0751521	-0.0567182	-0.0241643	-0.0666989	-0.0652416	-0.0688826
Plate10	68	AAA	10	3	20	NA	YLR416C	69	10	162	3766	0.8751	6973	3093	7285	3237	69	9	160	4240	0.7875	10363	4453	10475	4511	70	10	74	NA	NA	659	232	618	194	70	9	104	NA	NA	602	179	588	151	0.00947009	0.122934	-0.290109	-0.109288	0.025523	0.129854
Plate09	280	AAA	9	12	16	NNT1	YLR285W	23	114	228	5118	0.78	28544	11236	28749	11365	23	113	218	4831	0.7216	28439	11229	28751	11268	24	114	219	4972	0.7374	28533	11258	28812	11367	24	113	212	4835	0.7764	28745	11370	29050	11413	-0.0618765	-0.0501172	-0.0587765	-0.0517238	-0.0367906	-0.0415555
Plate14	152	AAA	14	7	8	YME1	YPR024W	77	130	82	2082	0.8487	32212	18662	32973	19147	77	129	81	2039	0.8644	31352	18074	32421	18886	78	130	83	2021	0.8389	31606	18744	33528	19586	78	129	83	2128	0.8007	31534	18118	32742	18767	-0.0638252	-0.0753613	-0.0632662	-0.0512301	-0.0694895	-0.0728665
Plate07	108	AAA	7	5	12	AVT7	YIL088C	41	122	128	3061	0.8247	19936	10141	21004	10551	41	121	122	2959	0.8268	20728	10500	21531	10994	42	122	120	2941	0.829	19901	10122	21019	10560	42	121	128	3104	0.8559	20154	10194	21074	10728	-0.067135	-0.0773432	-0.0670182	-0.0822927	-0.0640753	-0.0452179
Plate09	153	AAA	9	7	9	NA	YLR125W	13	128	205	4755	0.7935	27849	10916	28092	11033	13	127	204	4722	0.7842	27755	10956	28102	11083	14	128	219	4830	0.7677	28065	11041	28427	11139	14	127	219	5020	0.8057	28326	11176	28470	11305	-0.0569148	-0.0625058	-0.0517785	-0.0695639	-0.0350684	-0.0451999
Plate04	356	AAA	4	15	20	NA	YDR532C	61	10	64	1607	0.801	13684	7289	14742	7689	61	9	63	1434	0.8085	NA	6613	NA	7104	62	10	75	1801	0.8903	15609	8315	16496	8597	62	9	75	1777	0.7998	14944	8102	15843	8417	-0.0498049	NA	-0.043348	-0.0725547	-0.0631349	NA
Plate03	154	AAA	3	7	10	HO	YDL227C	13	126	122	3029	0.8483	24867	11341	26593	11778	13	125	129	3096	0.8509	25334	11550	27117	12023	14	126	128	3219	0.8645	25631	11597	27107	11642	14	125	138	3324	0.8309	26822	12069	28294	12446	-0.0875414	-0.0749074	-0.0405141	-0.0358166	-0.108888	-0.0963432
Plate09	80	AAA	9	4	8	BNA5	YLR231C	7	130	204	4722	0.7776	27813	11006	28112	11145	7	129	218	5034	0.7894	28344	11218	28553	11282	8	130	205	4892	0.7827	28616	11258	28711	11347	8	129	215	4994	0.8189	28595	11210	28733	11285	-0.0695331	-0.0623526	-0.0617393	-0.0531221	-0.0482024	-0.045319
Plate14	157	AAA	14	7	13	NA	YPR146C	77	120	167	4091	0.8218	25119	13875	25847	13992	77	119	177	4205	0.8903	24976	13607	25508	14058	78	120	181	4251	0.8257	25077	13930	25464	14338	78	119	182	4309	0.8018	25012	13723	25531	13884	-0.0685032	-0.0956594	-0.1238	-0.0781771	-0.082585	-0.0657808
Plate01	127	AAA	1	6	7	TYR1	YBR166C	11	36	130	3157	0.838	14150	7567	14906	7958	11	35	140	3138	0.8168	14127	7439	15051	7745	12	36	126	2868	0.8675	14158	7483	15112	7900	12	35	140	3214	0.8107	14818	7809	15616	8191	-0.0649221	-0.0133539	-0.0340024	-0.0327726	-0.0708184	-0.0498806
Plate03	31	AAA	3	2	7	NA	YDR314C	3	132	136	3170	0.822	26160	11574	27255	12001	3	131	136	3212	0.8379	25959	11834	26884	11848	4	132	126	2998	0.8312	25027	11332	26523	11907	4	131	126	3007	0.8708	24892	11365	26762	11928	-0.0637876	-0.0744606	-0.10415	-0.0899599	-0.0417792	-0.0801385
Plate01	146	AAA	1	7	2	ACS1	YAL054C	13	46	142	3214	0.8411	19329	10623	20551	10751	13	45	134	3127	0.8556	18465	10288	19431	10670	14	46	144	3401	0.8531	20001	10818	20813	11141	14	45	142	3310	0.872	19620	10621	20901	10795	0.0206043	-0.055238	-0.00801618	0.0410309	-0.0608851	-0.0869031
Plate13	194	AAA	13	9	2	NA	YOR271C	81	94	139	3003	0.8222	14954	7823	15749	7958	81	93	105	2479	0.8457	14404	7720	14841	8026	82	94	198	4814	0.7847	19618	10242	20222	10479	82	93	146	3395	0.8576	17865	9035	18793	9293	-0.0509879	-0.15382	-0.039821	0.0107758	-0.100025	-0.139675
Plate14	285	AAA	14	12	21	NA	YOR300W	87	104	171	4060	0.8383	28009	15883	28614	15924	87	103	164	3982	0.8559	28586	16105	29193	16898	88	104	151	3818	0.8962	28995	16475	29214	16895	88	103	157	3820	0.9096	28399	15948	28655	16317	-0.0693992	-0.11137	-0.109973	-0.0977912	-0.0876721	-0.07326
Plate07	275	AAA	7	12	11	FMP26	YJR080C	55	124	146	3677	0.8719	24345	13104	25540	13402	55	123	144	3669	0.8891	24698	13296	25625	13341	56	124	147	3605	0.9051	24607	13350	25924	13666	56	123	142	3669	0.8845	24799	13038	25956	13459	-0.0408303	-0.0297136	-0.0402597	-0.0193895	-0.0650235	-0.060027
Plate14	328	AAA	14	14	16	NA	YDR326C	91	114	169	3960	0.8138	27729	15813	28720	15994	91	113	160	3756	0.8562	29252	16434	29747	17005	92	114	169	3889	0.8477	27202	15267	28294	15534	92	113	163	3796	0.8087	29570	16725	29731	16833	-0.0689244	-0.0884879	-0.056307	-0.0766847	-0.0978804	-0.0626786
Plate03	43	AAA	3	2	19	NA	YDR306C	3	108	134	2971	0.7979	30643	15471	32149	15696	3	107	138	3010	0.8438	30424	15437	32319	15748	4	108	128	2877	0.768	30657	15603	32473	15765	4	107	137	3083	0.8142	31172	15987	32183	16058	-0.0511137	-0.0449296	-0.0373498	-0.0731642	-0.0756424	-0.0862518
Plate02	141	AAA	2	6	21	ATG20	YDL113C	11	56	139	3145	0.842	15107	8299	15882	8395	11	55	135	3104	0.8273	14923	8119	15821	8278	12	56	138	3310	0.7685	16637	8974	17282	9287	12	55	131	3087	0.8626	15099	8410	15393	8255	-0.053662	-0.0414141	-0.0524878	-0.0811193	-0.0772172	-0.0672524
Plate09	209	AAA	9	9	17	SLX4	YLR135W	17	112	172	3756	0.7526	26872	10661	27398	10799	17	111	169	3626	0.6996	26518	10207	27183	10373	18	112	163	3553	0.684	26761	10472	27393	10553	18	111	177	3892	0.7767	27275	10710	27874	10769	-0.0661361	-0.0237824	-0.0352338	-0.0359972	-0.0575725	-0.0189907
Plate12	277	AAA	12	12	13	DCS2	YOR173W	55	72	176	3978	0.8342	21920	9067	21969	9121	55	71	172	3972	0.8241	21166	8682	21220	8815	56	72	170	3910	0.7938	21486	8686	21476	8776	56	71	173	3995	0.8385	21462	8954	21667	8985	-0.0522767	-0.0622063	-0.0375478	-0.0544847	-0.0461137	-0.0428634
Plate10	56	AAA	10	3	8	TUS1	YLR425W	69	34	64	1592	0.8459	7488	3492	7706	3742	69	33	81	2467	0.7804	9225	5058	9473	5217	70	34	77	2050	0.8681	8197	3788	8260	3888	70	33	58	1552	0.8493	7551	3577	7722	3786	-0.0988944	-0.227474	-0.0433833	-0.111416	-0.0319666	-0.220901
Plate02	27	AAA	2	2	3	RAM1	YDL090C	3	92	101	NA	NA	2238	664	2169	505	3	91	NA	NA	NA	NA	NA	NA	NA	4	92	94	NA	NA	2574	930	2316	691	4	91	NA	NA	NA	NA	NA	NA	NA	0.159722	NA	-0.095997	NA	0.0159525	NA
Plate12	135	AAA	12	6	15	GCY1	YOR120W	43	68	58	961	0.5486	NA	4745	NA	4857	43	67	97	2093	0.7992	17084	6820	17490	7004	44	68	116	486	0.69	NA	1776	NA	1472	44	67	116	623	0.6925	NA	2074	NA	1726	NA	-0.0494785	NA	NA	NA	-0.0427322
Plate13	200	AAA	13	9	8	NA	YOR268C	81	82	124	2935	0.8424	14815	7445	15450	7747	81	81	NA	NA	NA	NA	NA	NA	NA	82	82	164	3850	0.8679	15677	8107	15907	8375	82	81	194	4910	0.8203	17933	9654	18382	9536	-0.0442902	NA	-0.104505	-0.0580354	-0.0475132	NA
Plate06	322	AAA	6	14	10	YSP1	YHR155W	59	78	146	3644	0.9149	18907	10729	19880	10603	59	77	135	3364	0.8322	18892	10434	20151	10897	60	78	160	4000	0.8772	19872	11289	20743	11248	60	77	153	3875	0.8692	19668	11008	20544	10817	-0.0132875	-0.0306363	-0.0307601	0.00861738	-0.0771048	-0.0396633
Plate07	146	AAA	7	7	2	NA	YIL110W	45	142	96	2328	0.8743	17036	8082	18195	8434	45	141	88	2095	0.8262	16330	7806	17210	8097	46	142	57	1434	0.8675	NA	6755	NA	7059	46	141	138	3277	0.8447	18869	9599	19918	10138	-0.0247099	-0.0652734	NA	-0.104889	-0.0292786	-0.0532884
Plate09	58	AAA	9	3	10	NA	YLL053C	5	126	204	4628	0.8359	28461	11183	28794	11264	5	125	201	4628	0.763	28099	11066	28385	11155	6	126	205	4727	0.7659	28341	11125	28647	11197	6	125	195	4549	0.7831	28249	11188	28475	11239	-0.0473538	-0.0559861	-0.0470593	-0.0613407	-0.0347872	-0.0399882
Plate10	178	AAA	10	8	10	NA	YMR099C	79	30	150	3725	0.8699	8315	3878	8761	4138	79	29	150	3879	0.8548	8554	4193	8944	4391	80	30	156	3855	0.856	7808	3883	8211	3924	80	29	157	4033	0.84	8507	4225	8844	4366	-0.0364205	-0.0843384	-0.0649427	-0.0939904	-0.015973	-0.0795671
Plate09	64	AAA	9	3	16	NA	YLL049W	5	114	187	4096	0.8334	25586	10021	26309	10136	5	113	204	4461	0.7586	26304	10238	27024	10486	6	114	205	4888	0.8561	27314	10699	27656	10717	6	113	207	4643	0.7748	27023	10536	27670	10758	-0.0427939	-0.0474206	-0.041462	-0.0458576	-0.0490922	-0.0355175
Plate07	40	AAA	7	2	16	BCK1	YJL095W	35	114	124	2873	0.8412	24030	12791	25702	13437	35	113	150	3496	0.8472	27035	14825	28559	15732	36	114	135	3089	0.8679	23960	12819	24876	13252	36	113	147	3322	0.8403	25420	13693	26762	14232	-0.0336094	-0.053641	-0.0704206	-0.0377425	-0.055617	-0.05038
Plate06	248	AAA	6	11	8	NA	YGR235C	53	82	131	3421	0.868	18270	10285	19231	10506	53	81	149	3864	0.8575	21723	12549	22612	13205	54	82	133	3316	0.8534	16538	9139	17207	9251	54	81	143	3653	0.86	18422	10069	19737	10356	-0.0505822	-0.122286	-0.0428724	0.00836559	-0.0699574	-0.0862542
Plate04	98	AAA	4	5	2	NA	YDR459C	41	46	163	4214	0.8449	12734	6795	12883	6892	41	45	153	3985	0.8256	13510	7131	13533	7400	42	46	150	4054	0.826	13561	7326	13431	7360	42	45	154	4089	0.8558	13894	7427	13753	7580	-0.0921395	-0.120916	-0.124313	-0.131383	-0.0674944	-0.0504235
Plate12	34	AAA	12	2	10	RRP6	YOR001W	35	78	88	1762	0.6233	15226	6005	15626	6048	35	77	106	1976	0.6854	16037	6365	16065	6451	36	78	88	1672	0.7501	15057	5905	15416	6187	36	77	80	1160	0.6001	NA	4908	NA	4838	-0.0197153	-0.0653179	-0.0712363	NA	-0.0440646	-0.0440051
Plate10	260	AAA	10	11	20	MRPL39	YML009c	85	10	44	887	0.8616	NA	172	NA	170	85	9	145	3845	0.8143	14018	7237	13958	7365	86	10	20	565	0.8373	NA	80	NA	83	86	9	166	4139	0.8222	11736	5961	12261	6139	NA	-0.0927727	NA	-0.0484231	NA	-0.0736222
Plate06	81	AAA	6	4	9	NVJ1	YHR195W	39	80	158	3841	0.8548	17442	9917	18151	10081	39	79	129	3087	0.8183	17104	9297	18414	9923	40	80	156	3985	0.856	18005	10076	18777	10007	40	79	177	4273	0.824	18381	10260	19326	10197	-0.0807491	-0.0372948	-0.019501	-0.00198898	-0.089149	-0.0291834
Plate11	327	AAA	11	14	15	NA	YNR009W	59	20	164	3831	0.735	18015	7388	18424	7536	59	19	163	3624	0.8009	17355	7101	17776	7202	60	20	178	4140	0.7906	18413	7553	18611	7784	60	19	179	3985	0.8101	17680	7302	18014	7497	-0.0318957	-0.0186261	-0.06414	-0.0569421	-0.0306322	-0.0281823
Plate13	187	AAA	13	8	19	NA	YPL199C	79	60	104	2674	0.8608	16785	8207	17137	8469	79	59	138	3461	0.8412	12087	6329	12321	6237	80	60	169	4184	0.825	16376	8512	17014	8638	80	59	150	3631	0.8735	14742	7678	15619	8227	-0.00516739	-0.102581	-0.042902	-0.10854	0.0123238	-0.14185
Plate06	306	AAA	6	13	18	NA	YGR242W	57	62	143	3395	0.8569	19735	10721	20963	11228	57	61	123	2883	0.8191	17708	10378	18179	10606	58	62	136	3314	0.8302	18028	10336	18863	10409	58	61	135	3127	0.8536	19780	10662	20667	10957	-0.0124213	-0.148401	-0.0668946	-0.000126012	-0.0117806	-0.129311
Plate14	40	AAA	14	2	16	ADE6	YGR061C	67	114	74	NA	NA	1136	279	1113	250	67	113	NA	NA	NA	NA	NA	NA	NA	68	114	80	NA	NA	1166	332	1128	290	68	113	82	NA	NA	985	313	917	247	0.053763	NA	-0.0943547	-0.270014	0.10184	NA
Plate11	68	AAA	11	3	20	NA	YMR245W	37	10	194	4447	0.814	14345	5904	14527	5967	37	9	179	3931	0.8211	15357	6288	15518	6387	38	10	193	4217	0.7833	15294	6164	15539	6307	38	9	183	4179	0.753	16257	6620	16339	6729	-0.0531594	-0.0485746	-0.0289568	-0.0454577	-0.0526081	-0.0372603
Plate02	276	AAA	2	12	12	STP4	YDL048C	23	74	140	3154	0.8911	16175	8910	17173	8947	23	73	140	3150	0.8414	16307	9042	16940	9090	24	74	139	3255	0.8364	16959	9395	17466	9301	24	73	147	3317	0.8719	16298	8975	16874	8980	-0.0136279	-0.0559189	-0.0377712	-0.0461368	-0.0651452	-0.0720495
Plate07	50	AAA	7	3	2	SEC28	YIL076W	37	142	67	1642	0.8514	17234	8555	17995	8791	37	141	62	1633	0.8547	21228	11520	21534	11697	38	142	28	632	0.7159	NA	4403	NA	4284	38	141	69	1820	0.8738	23738	11630	24203	12139	-0.0944305	-0.153913	NA	-0.00727218	-0.0830227	-0.124145
Plate07	201	AAA	7	9	9	PET130	YJL023C	49	128	131	3081	0.855	18410	9152	19678	9567	49	127	121	3019	0.8819	18565	9231	19692	9436	50	128	127	3116	0.8062	18790	9319	19897	9552	50	127	123	2965	0.8725	18556	9097	19644	9538	-0.0528241	-0.0345237	-0.0326904	-0.0518931	-0.0623539	-0.0597517
Plate03	34	AAA	3	2	10	HST4	YDR191W	3	126	145	3419	0.8521	25385	11493	26052	11919	3	125	123	2884	0.8732	24779	10698	26337	11165	4	126	129	3131	0.8193	25502	11428	26842	11938	4	125	140	3302	0.8316	25350	11638	26677	12086	-0.137405	-0.046442	-0.0855102	-0.110001	-0.0872682	-0.0497885
Plate12	311	AAA	12	13	23	NA	YOL114C	57	52	197	4205	0.8385	21860	8971	22178	9151	57	51	191	4268	0.8103	22307	9304	22525	9466	58	52	192	4277	0.8517	22558	9291	22847	9372	58	51	188	4235	0.7419	21923	9057	22235	9118	-0.0415873	-0.0607234	-0.0251934	-0.0328189	-0.0362748	-0.0527614
Plate11	26	AAA	11	2	2	NA	YNL146W	35	46	203	4234	0.7785	23414	9405	23692	9506	35	45	194	4085	0.7797	22626	9179	23068	9351	36	46	196	4218	0.7701	22995	9551	23433	9742	36	45	197	4230	0.7846	22348	9101	22621	9235	-0.0184408	-0.0308374	-0.0704743	-0.0394204	-0.0135336	-0.0248188
Plate12	142	AAA	12	6	22	PET127	YOR017W	43	54	175	3721	0.8542	19998	8110	20437	8285	43	53	164	3515	0.8219	19114	7721	19551	7926	44	54	159	3349	0.821	18651	7544	19245	7730	44	53	159	3350	0.7903	18883	7597	19202	7723	-0.0386858	-0.0477954	-0.0382985	-0.0405023	-0.0389813	-0.0417127
Plate01	315	AAA	1	14	3	TDP1	YBR223C	27	44	157	3505	0.8432	17458	9362	18288	9541	27	43	154	3372	0.8646	16789	9097	17663	9094	28	44	151	3396	0.8315	17662	9441	18440	9553	28	43	144	3175	0.8238	16934	9185	17697	9342	0.00283906	0.0144036	0.0138336	-0.0190385	-0.0435504	-0.0637025
Plate07	267	AAA	7	12	3	NA	YJR087W	55	140	128	2949	0.8777	14899	6934	15980	7140	55	139	139	3282	0.87	15847	7476	16680	7580	56	140	132	3088	0.8597	14984	7126	15798	7307	56	139	125	3017	0.8384	15174	7054	15851	7312	-0.0301795	-0.0344063	-0.077769	-0.0731316	-0.0502095	-0.0466799
Plate13	196	AAA	13	9	4	VPH1	YOR270C	81	90	64	1475	0.8681	NA	5607	NA	5669	81	89	53	1382	0.895	NA	5436	NA	5438	82	90	63	1512	0.9147	10914	5350	11084	5413	82	89	58	1446	0.8996	NA	5729	NA	5794	NA	NA	-0.0777594	NA	NA	NA
Plate06	359	AAA	6	15	23	SLT2	YHR030C	61	52	134	3056	0.8473	23401	13690	24148	13635	61	51	147	3374	0.7824	24399	14096	24836	13957	62	52	117	2767	0.8458	24701	13672	25920	14075	62	51	156	3542	0.7867	25458	14537	26444	14439	-0.0676011	-0.0575528	-0.00489596	-0.00999209	-0.095596	-0.0736707
Plate06	85	AAA	6	4	13	EGD2	YHR193C	39	72	92	NA	NA	1224	349	1188	286	39	71	NA	NA	NA	NA	NA	NA	NA	40	72	102	NA	NA	1167	309	1130	262	40	71	NA	NA	NA	NA	NA	NA	NA	-0.0337298	NA	-0.0273719	NA	-0.0853362	NA
Plate10	335	AAA	10	14	23	MRPL44	YMR225C	91	4	137	3165	0.8194	7584	3698	7786	3654	91	3	139	3384	0.7972	9589	4712	9752	4769	92	4	140	3407	0.7789	9167	4556	9303	4746	92	3	135	3081	0.818	7507	3556	7851	3696	-0.0509847	-0.0620526	-0.128201	-0.0535394	-0.0908937	-0.0653274
Plate11	187	AAA	11	8	19	YPT11	YNL304W	47	12	188	4302	0.7919	16287	6653	16591	6744	47	11	179	4064	0.7672	16002	6462	16229	6444	48	12	184	4308	0.7603	16623	6878	16830	6977	48	11	193	4482	0.8147	16504	6789	16634	6890	-0.0260613	0.0054753	-0.0531931	-0.0525737	-0.0290131	-0.0141957
Plate03	196	AAA	3	9	4	AAD4	YDL243C	17	138	101	2378	0.844	22483	9513	23285	9888	17	137	124	2906	0.8517	23219	9955	24434	10471	18	138	121	3003	0.8717	23898	10327	24559	11032	18	137	102	2493	0.821	23893	10206	24182	10564	-0.13188	-0.109749	-0.158183	-0.137978	-0.0881316	-0.0831521
Plate10	351	AAA	10	15	15	MSS1	YMR023C	93	20	125	2998	0.8171	8019	3916	8018	3845	93	19	126	2882	0.8913	8187	4001	8234	4119	94	20	126	3173	0.8541	9538	4622	10202	4899	94	19	131	3221	0.8651	9782	4873	10453	5094	-0.0742502	-0.125829	-0.0286728	-0.0436727	-0.0843754	-0.0821933
Plate06	149	AAA	6	7	5	ECM29	YHL030W	45	88	125	3048	0.7808	7311	3663	7453	3678	45	87	133	3142	0.8274	6874	3386	6842	3380	46	88	124	3027	0.862	7449	3774	7781	3870	46	87	138	3213	0.8152	7229	3632	7464	3697	-0.0757765	-0.0986442	-0.0757656	-0.0802741	-0.0556473	-0.0471184
Plate07	100	AAA	7	5	4	RSM25	YIL093C	41	138	129	2916	0.8378	15902	7503	16651	7745	41	137	128	2904	0.8316	15846	7599	16756	7919	42	138	130	2978	0.8813	16245	7666	17161	7869	42	137	127	2942	0.8397	16358	7852	17249	8207	-0.064083	-0.0814446	-0.0343865	-0.0783592	-0.0456869	-0.0675648
Plate11	311	AAA	11	13	23	PHO23	YNL097C	57	4	157	3383	0.7702	14608	5878	14825	5930	57	3	171	3879	0.8288	15396	6406	15521	6468	58	4	150	3213	0.7949	14628	5904	14852	6010	58	3	154	3320	0.7749	14624	5907	14934	5951	-0.0139568	-0.0659099	-0.0296942	-0.00779174	-0.0190643	-0.0594086
Plate11	201	AAA	11	9	9	NIS1	YNL078W	49	32	186	4220	0.7884	19916	8224	20457	8399	49	31	188	4281	0.7781	19959	8041	20224	8162	50	32	193	4475	0.7522	20220	8290	20597	8470	50	31	196	4444	0.7637	20066	8301	20400	8549	-0.0401131	-0.0143786	-0.0428386	-0.0700881	-0.0421136	-0.00614202
Plate11	352	AAA	11	15	16	IDP3	YNL009W	61	18	174	4080	0.8196	17858	7373	18167	7485	61	17	180	4007	0.833	17351	7164	17571	7277	62	18	168	3720	0.8262	17797	7211	18073	7266	62	17	185	4181	0.8043	18278	7495	18497	7537	-0.0424034	-0.0503204	-0.00724652	-0.0263817	-0.0404014	-0.041125
Plate02	106	AAA	2	5	10	ISW1	YBR245C	9	78	107	2745	0.8559	28987	17471	30173	17964	9	77	106	2685	0.782	28916	17443	30541	18068	10	78	102	2687	0.8387	28594	17510	29716	18078	10	77	100	2533	0.8038	27791	16983	29270	17983	-0.0339649	-0.0222062	-0.0664044	-0.0835695	-0.0496015	-0.0513239
Plate14	34	AAA	14	2	10	NA	YGR122W	67	126	126	2973	0.8444	17965	9536	18727	9590	67	125	85	2118	0.7471	16088	8022	16718	8339	68	126	80	2069	0.7735	16072	8156	16677	8422	68	125	91	2374	0.8532	15388	8118	15821	8313	-0.0768812	-0.0652485	-0.0823074	-0.146343	-0.0960394	-0.0282471
Plate07	60	AAA	7	3	12	MAM33	YIL070C	37	122	144	3224	0.7959	19694	9890	21067	10133	37	121	141	3213	0.8049	19693	9909	20879	9974	38	122	136	3188	0.8742	19507	9779	20769	9968	38	121	134	3198	0.8936	19936	10024	21144	10350	-0.0120588	-0.00717152	-0.0151103	-0.0323483	-0.0519964	-0.0545151
Plate11	57	AAA	11	3	9	HHT2	YNL031C	37	32	155	3456	0.7594	19366	8005	19912	8153	37	31	162	3551	0.7709	19610	8037	20100	8222	38	32	181	4063	0.8288	19829	8143	20375	8306	38	31	181	3862	0.7765	19177	7794	19722	7968	-0.0348754	-0.0338435	-0.0294549	-0.0150239	-0.0426295	-0.0305666
Plate07	28	AAA	7	2	4	PRM10	YJL108C	35	138	165	3773	0.8356	20167	10045	21007	10258	35	137	158	3715	0.8892	20585	10342	21531	10510	36	138	165	3726	0.8764	19412	9754	20133	10131	36	137	160	3697	0.818	19040	9685	19716	10065	-0.0319624	-0.0215358	-0.0863792	-0.112677	-0.033384	-0.0371892
Plate06	62	AAA	6	3	14	PUS6	YGR169C	37	70	145	3753	0.8873	20899	11581	21550	11708	37	69	156	3830	0.8284	20786	11922	21290	12078	38	70	157	3904	0.81	22008	12495	22908	12959	38	69	156	3809	0.8033	20941	11777	21682	11963	-0.0286356	-0.0898521	-0.0767557	-0.0491866	-0.0328539	-0.0812262
Plate03	150	AAA	3	7	6	PTP1	YDL230W	13	134	139	3339	0.8404	24800	10800	26635	11025	13	133	141	3361	0.8446	25277	10964	26766	11028	14	134	133	3139	0.8366	23093	10161	24636	10283	14	133	133	3126	0.8647	24195	10621	25833	10901	-0.0124794	-0.0039963	-0.0750773	-0.054739	-0.0589379	-0.0421869
Plate04	32	AAA	4	2	8	GIP2	YER054C	35	34	164	3921	0.8229	15853	8375	16421	8532	35	33	167	4136	0.8639	16805	8919	17493	9050	36	34	166	4116	0.8903	15961	8640	16433	8855	36	33	160	4084	0.8564	16128	8667	16692	8665	-0.0392616	-0.0300782	-0.0909108	-0.037203	-0.0477941	-0.0530276
Plate03	167	AAA	3	7	23	SPO71	YDR104C	13	100	179	4044	0.7531	39220	23617	39925	24440	13	99	179	3866	0.8037	40588	26523	41498	28302	14	100	184	4124	0.8539	38382	22271	39147	23671	14	99	185	4027	0.7771	39591	24160	40044	24777	-0.10232	-0.173739	-0.107547	-0.110318	-0.0653221	-0.118253
Plate01	225	AAA	1	10	9	SOY1	YBR194W	19	32	116	3018	0.8831	20162	11037	19943	11341	19	31	127	3250	0.9031	20780	11401	20809	11597	20	32	129	3274	0.8314	21106	11605	21399	11955	20	31	127	3214	0.8786	20590	11372	21148	11704	-0.097617	-0.0624141	-0.0604061	-0.0499542	-0.0485675	-0.0465757
Plate14	93	AAA	14	4	21	NA	YGR272C	71	104	137	3025	0.8433	15957	8314	16665	8404	71	103	138	3245	0.8743	17559	8922	18453	9191	72	104	142	3332	0.836	17302	9093	17847	9213	72	103	126	2874	0.8574	16288	8365	17270	8541	-0.0805555	-0.0427954	-0.0976417	-0.0470638	-0.0894868	-0.0402037
Plate10	222	AAA	10	10	6	FMP24	YMR115W	83	38	84	2210	0.8391	8430	4040	8727	4169	83	37	84	2297	0.8549	8607	4165	9010	4392	84	38	129	3423	0.8957	10421	5206	10834	5364	84	37	106	2652	0.8639	8190	4058	8417	4181	-0.0524467	-0.0733143	-0.0578928	-0.112044	-0.0509941	-0.0610299
Plate06	130	AAA	6	6	10	HXT5	YHR096C	43	78	122	3002	0.8278	14060	7684	14755	8092	43	77	114	2849	0.8789	14668	7990	15647	8313	44	78	117	2727	0.8654	13244	7201	13985	7554	44	77	128	3013	0.901	13892	7534	14807	7749	-0.0908949	-0.0391585	-0.0774739	-0.0260865	-0.0610001	-0.0510148
Plate13	317	AAA	13	14	5	APM1	YPL259C	91	88	127	3129	0.8628	19192	9924	19482	10113	91	87	135	3307	0.8517	19266	10121	19572	10291	92	88	96	2658	0.8345	23681	12984	22474	12014	92	87	147	3529	0.8622	19669	10660	20112	10543	-0.0486402	-0.0652403	-0.0642148	-0.0564198	-0.0400166	-0.0608081
Plate01	149	AAA	1	7	5	KIP1	YBL063W	13	40	150	3683	0.8707	18976	10419	19227	10917	13	39	156	3719	0.8005	17960	9808	18179	10220	14	40	169	4049	0.837	18104	9618	18437	9886	14	39	168	4035	0.8727	18862	10225	19120	10672	-0.102339	-0.0992522	-0.0327304	-0.0802607	-0.0625654	-0.0639643
Plate06	151	AAA	6	7	7	NA	YHL029C	45	84	74	1830	0.8786	13098	7041	13295	7295	45	83	154	3806	0.8405	18985	10584	20304	10844	46	84	48	1250	0.8795	NA	5680	NA	5979	46	83	138	3446	0.8817	17981	10102	18518	10254	-0.106246	-0.0125196	NA	-0.0740406	-0.0475344	-0.0520764
Plate02	84	AAA	2	4	12	NA	YCR085W	7	74	182	4116	0.8363	26740	15733	27573	15938	7	73	187	4153	0.8415	25234	14963	26079	15433	8	74	176	4103	0.8941	25841	15395	26504	15759	8	73	188	4289	0.8714	25159	15192	26066	15621	-0.0213519	-0.0675987	-0.0692637	-0.0841709	-0.0373707	-0.0614692
Plate09	229	AAA	9	10	13	CSR1	YLR380W	19	120	208	4611	0.7213	28365	11073	28607	10941	19	119	204	4755	0.7969	28636	11248	28815	11288	20	120	206	4598	0.7283	28414	11171	28614	11060	20	119	203	4610	0.7768	28394	11268	28538	11249	-0.017786	-0.0491346	-0.0320984	-0.0591746	-0.0264812	-0.0333441
Plate01	220	AAA	1	10	4	MIS1	YBR084W	19	42	100	2438	0.7908	18598	10119	19414	10484	19	41	99	2450	0.8963	18260	9892	18642	10361	20	42	115	2797	0.853	19613	10725	20204	11159	20	41	129	3036	0.8536	19068	10307	20013	10890	-0.0328367	-0.0791785	-0.0558149	-0.0374733	-0.0534033	-0.0503922
Plate12	176	AAA	12	8	8	CYC2	YOR037W	47	82	187	4240	0.8558	22774	9373	23089	9511	47	81	177	4103	0.8	22189	9187	22639	9464	48	82	200	4531	0.84	22969	9496	23290	9684	48	81	184	4139	0.8244	22197	9228	22537	9380	-0.0272091	-0.0523838	-0.0362781	-0.0481076	-0.0298622	-0.0444152
Plate09	116	AAA	9	5	20	NA	YLL059C	9	106	196	4371	0.7241	26624	10453	27046	10586	9	105	198	4383	0.8514	26540	10359	26948	10481	10	106	197	4436	0.7775	26806	10440	27240	10518	10	105	186	4182	0.7196	26912	10442	27478	10536	-0.0590002	-0.0510979	-0.0393278	-0.0283044	-0.0450823	-0.0377049
Plate03	84	AAA	3	4	12	NA	YDR209C	7	122	138	3344	0.8414	25812	12006	27549	12459	7	121	148	3480	0.8583	28014	13028	28897	13173	8	122	127	3090	0.821	27162	12578	29183	12903	8	121	148	3563	0.8356	27371	12762	28294	13199	-0.0850822	-0.0589213	-0.0188198	-0.0991962	-0.106231	-0.050394
Plate11	64	AAA	11	3	16	NA	YMR247C	37	18	185	4311	0.7444	18037	7315	18019	7383	37	17	192	4310	0.799	18038	7465	18088	7510	38	18	181	4073	0.8046	17753	7272	17953	7309	38	17	201	4516	0.8789	17500	7187	17586	7264	-0.0345166	-0.0535047	-0.0253763	-0.0465201	-0.0146032	-0.0436898
Plate04	214	AAA	4	9	22	PHO8	YDR481C	49	6	177	4240	0.8108	21575	11709	22234	11959	49	5	180	4368	0.8207	21638	11616	22375	11569	50	6	191	4599	0.8811	20363	10741	20926	10974	50	5	190	4462	0.8528	21022	11303	21751	11371	-0.072497	-0.0163111	-0.0400383	-0.0334836	-0.0790243	-0.0633762
Plate10	221	AAA	10	10	5	PFK2	YMR205C	83	40	102	2498	0.8131	6867	3037	7280	3170	83	39	147	3516	0.8428	7290	3519	7684	3639	84	40	135	3851	0.8358	11229	6001	11063	5887	84	39	58	1453	0.869	NA	1858	NA	1915	0.0365349	-0.0657767	-0.15067	NA	0.0272033	-0.083212
Plate12	233	AAA	12	10	17	PDR5	YOR153W	51	64	130	2828	0.7417	19359	7909	19650	7862	51	63	164	3982	0.7521	22623	9163	22691	9213	52	64	136	3025	0.8205	20130	8305	20446	8369	52	63	140	3243	0.7952	21052	8547	21141	8555	-0.0291071	-0.0140476	-0.0514526	-0.0285301	-0.0548331	-0.0105902
Plate02	138	AAA	2	6	18	MSH3	YCR092C	11	62	173	4157	0.8383	23000	13168	23723	12919	11	61	141	3449	0.8096	22785	13837	22728	14202	12	62	164	3992	0.8051	23483	13244	24051	13240	12	61	172	3983	0.8573	22226	13047	22900	13310	0.0149128	-0.176466	0.00451142	-0.0797893	-0.0365571	-0.116975
Plate08	70	AAA	8	3	22	NA	YJR100C	5	54	167	3689	0.7913	22695	9225	23019	9377	5	53	191	4130	0.7617	22823	9243	23091	9377	6	54	173	3727	0.8016	22445	9088	22631	9267	6	53	183	3945	0.7914	22607	9200	22830	9307	-0.0535835	-0.0486685	-0.0648433	-0.0567256	-0.0386073	-0.0321702
Plate13	83	AAA	13	4	11	PPQ1	YPL179W	71	76	108	3074	0.855	23071	12826	23769	13336	71	75	104	2643	0.8994	16361	8370	17279	8774	72	76	118	3084	0.8645	16413	8280	17276	8697	72	75	101	2463	0.8819	13335	6778	13909	6984	-0.120625	-0.0402836	-0.0286412	-0.0668111	-0.107517	-0.0534944
Plate12	359	AAA	12	15	23	VPS68	YOL129W	61	52	167	3502	0.7927	20932	8558	21352	8670	61	51	190	3868	0.7401	21412	8808	21910	8986	62	52	165	3371	0.7572	21077	8579	21443	8700	62	51	164	3365	0.7452	21839	8967	22241	9175	-0.0306302	-0.0370402	-0.0285164	-0.0405029	-0.0408558	-0.0441203
Plate07	285	AAA	7	12	21	MOG1	YJR074W	55	104	152	3834	0.8783	25507	13753	26250	14401	55	103	154	3949	0.8111	26117	14161	27169	15000	56	104	149	3756	0.8359	25586	13841	26125	14355	56	103	148	3706	0.8673	25576	13770	25920	14403	-0.0842193	-0.0775445	-0.0881634	-0.105297	-0.0503412	-0.0488082
Plate13	55	AAA	13	3	7	NA	YOR322C	69	84	138	3300	0.8206	13868	6818	14564	7085	69	83	139	3333	0.8855	13750	6804	14165	6888	70	84	120	3026	0.855	14976	7216	15181	7304	70	83	100	2548	0.8724	14954	8530	15358	8547	-0.0150888	-0.0200877	0.00791312	-0.185894	-0.0303784	-0.04076
Plate09	55	AAA	9	3	7	KIN2	YLR096W	5	132	200	4313	0.841	28572	11138	29027	11264	5	131	189	4100	0.7881	27935	10989	28365	11049	6	132	189	4224	0.8297	28497	11139	28886	11284	6	131	202	4598	0.7649	28532	11347	28920	11504	-0.0350566	-0.0441002	-0.0448978	-0.069368	-0.0233658	-0.0394221
Plate03	260	AAA	3	11	20	RAD57	YDR004W	21	106	55	1409	0.7929	NA	14617	NA	15269	21	105	64	1640	0.8583	31798	16527	33996	17095	22	106	58	1517	0.8275	29852	14745	30649	15406	22	105	57	1508	0.7952	30146	14920	32019	15000	NA	-0.0378362	-0.118876	-0.0106929	NA	-0.0792894
Plate04	180	AAA	4	8	12	NA	YER087C-A	47	26	170	4202	0.8474	16110	8664	16765	8810	47	25	169	4185	0.8861	16356	8751	17334	9027	48	26	177	4421	0.8799	16457	8790	17137	8930	48	25	168	4242	0.8522	16281	8585	17179	8736	-0.0543421	-0.0398676	-0.0413206	-0.00658667	-0.0729573	-0.0652077
Plate12	179	AAA	12	8	11	SIA1	YOR137C	47	76	31	247	0.7229	NA	1382	NA	1330	47	75	155	391	0.7755	NA	1202	NA	958	48	76	61	911	0.684	NA	4527	NA	4549	48	75	102	2260	0.8194	18002	7205	18363	7412	NA	NA	NA	-0.0529637	NA	NA
Plate10	114	AAA	10	5	18	IMD3	YLR432W	73	14	165	4099	0.8305	9125	4236	9397	4237	73	13	164	4035	0.8543	9438	4390	9860	4446	74	14	96	2511	0.7883	7742	3368	7980	3457	74	13	86	NA	NA	795	326	763	274	0.0397964	0.04919	0.0614453	-0.311898	0.00470748	0.00720014
Plate11	133	AAA	11	6	13	NA	YNL296W	43	24	151	3264	0.6998	16081	6605	16507	6795	43	23	156	3262	0.7763	15979	6582	16536	6791	44	24	148	3380	0.7759	16686	6782	17012	7011	44	23	175	3886	0.7592	17047	6925	17334	7023	-0.0441828	-0.0407677	-0.0443509	-0.0193665	-0.0376298	-0.0421451
Plate01	128	AAA	1	6	8	YRO2	YBR054W	11	34	134	3122	0.8724	14316	7552	15104	7832	11	33	135	3028	0.848	13692	7190	14541	7552	12	34	141	3134	0.9097	14626	7673	15586	8131	12	33	137	3105	0.8581	14110	7427	14940	7712	-0.0231031	-0.0319438	-0.0257603	-0.018903	-0.0504407	-0.0504792
Plate13	314	AAA	13	14	2	PRM4	YPL156C	91	94	191	4329	0.8796	22160	12191	22387	12018	91	93	43	1175	0.8489	NA	12824	NA	12344	92	94	140	3331	0.856	18430	9245	19227	9819	92	93	176	4160	0.8825	24155	13427	23941	12824	-0.070587	NA	-0.0288221	-0.0564006	-0.0999854	NA
Plate13	286	AAA	13	12	22	RNY1	YPL123C	87	54	130	3268	0.818	13167	6578	13573	6880	87	53	129	2980	0.865	12866	6489	13349	6805	88	54	97	2524	0.8292	12513	6493	12699	6747	88	53	143	3512	0.7943	14834	7245	15472	7612	-0.0844301	-0.0954236	-0.161062	-0.0184375	-0.0619555	-0.0792214
Plate01	270	AAA	1	12	6	FES1	YBR101C	23	38	130	2961	0.8263	16243	8669	17035	9133	23	37	135	3013	0.8717	15701	8465	16398	9083	24	38	126	2912	0.8029	16357	8766	17134	9194	24	37	139	3144	0.8805	15844	8271	16736	8673	-0.0468686	-0.0978497	-0.0469935	-0.00408376	-0.0480061	-0.066909
Plate03	46	AAA	3	2	22	NA	YDR179W-A	3	102	145	3173	0.808	33686	17620	35379	18359	3	101	144	3070	0.829	36055	21214	37360	21392	4	102	140	3106	0.857	31199	15984	32206	15848	4	101	163	3644	0.7764	36004	19989	37636	20957	-0.0381037	-0.093214	-0.0580107	-0.0585805	-0.0421679	-0.111527
Plate12	357	AAA	12	15	21	NA	YOL131W	61	56	178	3785	0.7785	21936	8992	22308	9183	61	55	184	4016	0.8153	21941	9012	22310	9142	62	56	184	3856	0.8255	21509	8881	21918	9191	62	55	177	3771	0.8241	21892	8971	22503	9179	-0.0368673	-0.0309075	-0.0659282	-0.0224881	-0.0339677	-0.0365579
Plate11	30	AAA	11	2	6	NA	YNL144C	35	38	206	4746	0.8288	21143	8607	21284	8760	35	37	204	4683	0.7502	20701	8513	20947	8697	36	38	208	4493	0.8044	20201	8238	20477	8360	36	37	184	4069	0.7853	19962	8174	20256	8410	-0.0462514	-0.0580431	-0.0318916	-0.0560231	-0.0244151	-0.0380293
Plate13	339	AAA	13	15	3	ELC1	YPL046C	93	92	143	3611	0.7898	21202	11475	21234	11803	93	91	110	2604	0.808	20469	10531	21056	10783	94	92	132	3539	0.7618	28160	15603	26828	14788	94	91	153	3601	0.8146	22849	12560	24280	13289	-0.126755	-0.0168492	-0.0765323	-0.0833698	-0.0851398	-0.0221838
Plate12	94	AAA	12	4	22	SGT2	YOR007C	39	54	174	3642	0.8042	18758	7554	19039	7719	39	53	186	4038	0.8411	19620	7902	19824	8062	40	54	177	3848	0.8283	19408	7921	19801	8058	40	53	183	3955	0.8455	19757	7919	20061	8020	-0.0528595	-0.0493196	-0.050443	-0.0239721	-0.0406554	-0.0331377
Plate03	93	AAA	3	4	21	MCM21	YDR318W	7	104	169	3719	0.8598	39209	23582	40840	23592	7	103	188	4043	0.8247	38846	23246	41027	23140	8	104	169	3775	0.8406	38874	22759	40905	22677	8	103	157	3383	0.8022	39499	24932	41805	25681	-0.0243322	0.00359056	0.0181745	-0.0642453	-0.0643372	-0.0670818
Plate08	140	AAA	8	6	20	NA	YKL207W	11	58	169	3772	0.727	23845	9772	24188	9748	11	57	185	3967	0.701	23544	10173	23801	10278	12	58	192	4414	0.8315	25401	10483	25622	10607	12	57	173	3807	0.7908	24453	9671	24616	9586	-0.0264844	-0.121227	-0.0455447	0.0231005	-0.0342448	-0.10636
Plate02	330	AAA	2	14	18	RPS29B	YDL061C	27	62	171	4115	0.8857	18843	10722	19544	10610	27	61	127	2866	0.8292	14437	7515	15125	7777	28	62	169	3910	0.8516	16531	9278	16981	9256	28	61	187	4228	0.9013	17288	9594	17923	9577	-0.0330129	-0.0311175	-0.0758007	-0.0353731	-0.0738287	-0.0165562
Plate13	252	AAA	13	11	12	RFM1	YOR279C	85	74	70	1808	0.847	16025	8176	15423	8128	85	73	67	1571	0.8412	11408	5898	12077	6089	86	74	55	1251	0.8694	NA	5513	NA	5841	86	73	110	2878	0.9048	21918	11291	22612	11794	-0.111638	-0.101468	NA	-0.0297522	-0.0535872	-0.136371
Plate08	95	AAA	8	4	23	UTP30	YKR060W	7	52	180	3840	0.7843	23846	9658	23973	9674	7	51	169	3598	0.6993	23391	9649	23512	9656	8	52	167	3601	0.7522	24129	9864	24427	9838	8	51	186	4091	0.7767	25372	10682	25201	10598	-0.0305405	-0.0586532	-0.0230427	-0.070748	-0.0190284	-0.0485227
Plate07	174	AAA	7	8	6	INO1	YJL153C	47	134	127	3026	0.8569	16725	8014	17679	8256	47	133	125	2967	0.8226	16805	8128	17794	8441	48	134	129	3066	0.8751	17051	8117	17738	8178	48	133	130	3087	0.8771	16672	8019	17632	8245	-0.0453718	-0.0623132	-0.0280901	-0.04808	-0.0482327	-0.0585178
Plate12	307	AAA	12	13	19	MSN1	YOL116W	57	60	191	4095	0.8112	20428	8378	20764	8552	57	59	177	3918	0.7596	20413	8341	20738	8495	58	60	192	4244	0.8072	20638	8322	21068	8472	58	59	184	4181	0.7717	20850	8456	21126	8638	-0.0561559	-0.0492416	-0.0210242	-0.0424052	-0.0500071	-0.0451967
Plate11	291	AAA	11	13	3	NA	YNL115C	57	44	168	3717	0.8135	22642	9219	23272	9428	57	43	174	3671	0.753	22265	9097	22954	9197	58	44	190	4229	0.8284	23260	9387	23715	9677	58	43	189	4053	0.7903	22869	9312	23506	9462	-0.0308837	-0.0129122	-0.0438736	-0.0224015	-0.0303168	-0.0339078
Plate02	236	AAA	2	10	20	DIA3	YDL024C	19	58	147	3403	0.868	15164	8154	16042	8532	19	57	149	3357	0.8555	14283	7669	14706	7526	20	58	155	3525	0.8823	14820	7958	15564	8178	20	57	147	3375	0.821	14028	7584	14437	7408	-0.0589793	-0.0328678	-0.0514297	-0.0415523	-0.0479697	-0.0601515
Plate03	175	AAA	3	8	7	NA	YDR370C	15	132	125	3012	0.8233	23997	10486	25589	10681	15	131	126	3055	0.8359	24727	10795	26449	11120	16	132	129	3134	0.8528	24332	10408	25419	10282	16	131	132	3149	0.8303	23590	10185	25473	10329	-0.0492701	-0.0344222	-0.0192206	-0.0204657	-0.0837955	-0.0636186
Plate01	106	AAA	1	5	10	NA	YAL027W	9	30	141	3239	0.898	13431	7092	13744	7373	9	29	152	3452	0.8062	13983	7260	14462	7574	10	30	129	2983	0.892	14239	7438	14861	7683	10	29	135	3062	0.8013	13097	6868	13734	7168	-0.0857011	-0.044223	-0.0219177	-0.0485963	-0.0607391	-0.0319652
Plate07	329	AAA	7	14	17	BUD4	YJR092W	59	112	145	3536	0.8569	26522	13994	27748	14305	59	111	132	3387	0.8354	23291	12832	24241	13303	60	112	148	3597	0.8101	25991	14632	27079	15336	60	111	144	3629	0.8518	27779	14471	28639	14900	0.0157628	-0.117841	-0.110313	0.0178519	-0.00885047	-0.110323
Plate02	108	AAA	2	5	12	GPX2	YBR244W	9	74	168	3827	0.8893	26418	16049	27198	16818	9	73	159	3707	0.8475	27211	16139	27816	16961	10	74	158	3801	0.8783	26789	15938	27279	16563	10	73	164	3904	0.8485	26147	15521	26435	16389	-0.112968	-0.0883682	-0.0883822	-0.124428	-0.0826047	-0.0437668
Plate08	316	AAA	8	14	4	NA	YKR047W	27	90	184	3894	0.8127	28752	12161	29535	12234	27	89	189	3922	0.85	28750	12360	29692	12472	28	90	194	4176	0.7683	29643	13473	30356	13497	28	89	202	4193	0.8076	29077	12394	29655	12603	-0.000662971	-0.0162931	-0.0786284	-0.0314453	-0.010166	-0.030494
Plate12	81	AAA	12	4	9	LEU9	YOR108W	39	80	114	2420	0.8004	16956	6908	17288	6970	39	79	140	3094	0.8028	19303	7692	19623	7852	40	80	117	698	0.5962	NA	2987	NA	2717	40	79	159	3480	0.8151	18804	7456	18792	7442	-0.0603559	-0.0295103	NA	-0.0232041	-0.0717095	-0.0215622
Plate09	125	AAA	9	6	5	RSC2	YLR357W	11	136	28	106	0.448	NA	1875	NA	1894	11	135	NA	149	0.4374	NA	NA	NA	NA	12	136	180	141	0.7076	NA	1581	NA	1265	12	135	107	2198	0.8588	23823	9130	24393	9292	NA	NA	NA	-0.0425789	NA	NA
Plate10	348	AAA	10	15	12	VPS71	YML041C	93	26	124	3488	0.8288	11561	5788	11917	5984	93	25	57	1439	0.8606	NA	3148	NA	3333	94	26	59	1339	0.8926	NA	2718	NA	2987	94	25	84	2121	0.8442	7421	3561	7732	3709	-0.0579687	NA	NA	-0.0817948	-0.0618427	NA
Plate09	185	AAA	9	8	17	NA	YLR364W	15	112	203	4586	0.7954	28811	11365	29091	11299	15	111	190	4288	0.7731	28693	11244	29102	11382	16	112	203	4454	0.7607	28621	11240	29158	11049	16	111	200	4416	0.7925	28547	11218	29192	11132	-0.0359167	-0.0452963	-0.00198785	-0.0103809	-0.0381713	-0.0298314
Plate08	33	AAA	8	2	9	TRM2	YKR056W	3	80	168	3597	0.84	24270	9929	24608	9982	3	79	165	3484	0.7647	22823	9270	23161	9208	4	80	170	3577	0.7956	22369	9140	22681	9171	4	79	162	3493	0.7271	23962	9798	24259	9836	-0.0304012	-0.0200475	-0.0477016	-0.0336495	-0.0265677	-0.0359403
Plate02	347	AAA	2	15	11	NA	YCR051W	29	76	178	4266	0.8211	22013	12793	22768	12844	29	75	162	3952	0.8875	25439	15161	24902	14666	30	76	176	4165	0.8536	24185	14133	25020	14220	30	75	147	3320	0.8634	20280	11447	21508	11790	-0.0423563	-0.0741271	-0.026371	-0.0201279	-0.066551	-0.0662573
Plate08	347	AAA	8	15	11	PIR3	YKL163W	29	76	210	4643	0.8117	29128	12549	29519	12421	29	75	229	4966	0.8471	29263	12988	30038	12951	30	76	206	4480	0.8119	29063	12289	29606	12363	30	75	215	4679	0.7446	29335	12851	29866	12748	-0.0206538	-0.0445581	-0.00997564	-0.0342082	-0.027867	-0.0627586
Plate01	78	AAA	1	4	6	QDR3	YBR043C	7	38	98	2164	0.8811	12772	6667	13415	7011	7	37	138	3070	0.8559	13589	7114	14626	7360	8	38	83	1978	0.8892	13118	6765	13816	7022	8	37	140	3137	0.8746	13293	6971	14301	7291	-0.0545345	0.0118684	-0.0115961	-0.00975596	-0.0518699	-0.0473082
Plate09	115	AAA	9	5	19	NA	YLR104W	9	108	179	3923	0.7767	27297	10706	27631	10642	9	107	182	3920	0.7849	26982	10513	27366	10423	10	108	162	3478	0.745	26547	10301	26998	10252	10	107	191	4117	0.7731	27094	10572	27441	10606	-0.0333412	-0.0199851	-0.0184217	-0.039328	-0.0392804	-0.032379
Plate01	54	AAA	1	3	6	SYN8	YAL014C	5	38	127	3100	0.8808	16603	8765	17014	9037	5	37	129	2997	0.8602	14612	7831	15232	8242	6	38	111	2658	0.9203	16032	8575	16407	8947	6	37	91	2262	0.8511	15244	7980	15927	8167	-0.0344637	-0.079299	-0.076595	0.00139741	-0.0297919	-0.0692054
Plate04	158	AAA	4	7	14	SDC1	YDR469W	45	22	84	2018	0.7958	9868	5249	10184	5451	45	21	78	1759	0.7973	9399	4956	9802	5111	46	22	66	1525	0.7748	8884	4691	9124	4876	46	21	69	1649	0.7422	9524	4942	9890	5044	-0.104628	-0.0699156	-0.109262	-0.0381157	-0.0709177	-0.0607232
Plate07	87	AAA	7	4	15	NA	YJR003C	39	116	139	3270	0.797	23948	12523	25446	12909	39	115	116	2803	0.8926	22871	11762	24378	12242	40	116	82	1983	0.863	20491	10817	21782	11044	40	115	128	3166	0.873	25098	13197	26635	13901	-0.000645028	-0.00583904	-0.0638879	-0.016592	-0.034408	-0.0297233
Plate03	105	AAA	3	5	9	BMH2	YDR099W	9	128	124	3201	0.844	30700	14995	31600	15320	9	127	131	3332	0.8654	28364	13850	29132	14605	10	128	134	3387	0.8575	29230	13703	30402	14167	10	127	142	3531	0.8664	27199	13133	28136	13962	-0.0570826	-0.154695	-0.0446013	-0.169738	-0.0386296	-0.0950299
Plate04	215	AAA	4	9	23	AFG1	YEL052W	49	4	201	4642	0.8567	21259	11470	21935	11720	49	3	189	4505	0.804	22672	11882	22993	11811	50	4	194	4550	0.8178	21647	11768	22254	11786	50	3	196	4576	0.825	22716	12121	23183	11966	-0.0638667	-0.00548938	-0.05057	-0.0117976	-0.070993	-0.027806
Plate10	150	AAA	10	7	6	SST2	YLR452C	77	38	157	3761	0.8899	7974	3902	8093	3860	77	37	138	3308	0.8676	7028	3274	7375	3283	78	38	128	3060	0.8792	7242	3508	7725	3597	78	37	148	3540	0.8316	7321	3444	7774	3514	-0.0651395	0.00941204	-0.0419706	-0.000844595	-0.0880371	-0.0402371
Plate10	244	AAA	10	11	4	NA	YML018C	85	42	174	4186	0.8678	8665	4243	9063	4306	85	41	191	4810	0.8409	10050	4925	10545	5085	86	42	177	4554	0.8138	9507	4712	9991	4816	86	41	160	3930	0.8594	8292	3980	8046	3925	-0.0376915	-0.0277893	-0.037917	-0.0965665	-0.0761597	-0.0543231
Plate04	82	AAA	4	4	10	THO1	YER063W	39	30	136	3217	0.8891	12361	6517	13031	6868	39	29	126	3023	0.8609	11971	6379	12603	6575	40	30	125	3046	0.8913	12657	6725	13441	7048	40	29	127	3212	0.8599	12453	6574	13022	6845	-0.0704387	-0.0575614	-0.0617361	-0.0666922	-0.0510819	-0.0671895
Plate09	354	AAA	9	15	18	NA	YLR073C	29	110	205	4459	0.7884	29126	11472	29524	11390	29	109	212	4491	0.798	28995	11345	29695	11443	30	110	205	4493	0.792	29635	11689	30022	11660	30	109	198	4297	0.7816	29263	11574	29816	11531	-0.0243035	-0.021824	-0.0307537	-0.0260683	-0.034408	-0.0260805
Plate14	233	AAA	14	10	17	ABZ1	YNR033W	83	112	151	3596	0.818	24758	13443	25459	13825	83	111	141	3415	0.8729	23779	12946	24841	12998	84	112	160	3766	0.884	25431	13844	26504	13925	84	111	156	3762	0.8611	25062	13597	25761	13546	-0.0771979	-0.0366078	-0.0221854	-0.0320916	-0.0634749	-0.0765372
Plate14	282	AAA	14	12	18	UBS1	YBR165W	87	110	147	3666	0.873	28225	15657	28579	16246	87	109	150	3544	0.8544	28135	15431	28877	15949	88	110	153	3723	0.8361	28177	15744	29075	16621	88	109	153	3740	0.8906	26939	15208	27414	15776	-0.0966211	-0.0565143	-0.0972803	-0.127038	-0.0568745	-0.0430499
Plate08	57	AAA	8	3	9	NA	YKL070W	5	80	175	3821	0.7894	25623	10655	25754	10582	5	79	170	3712	0.7717	25641	10512	26103	10611	6	80	194	4214	0.8206	25649	10848	25957	10953	6	79	158	3470	0.7815	24690	10305	25123	10340	-0.0343221	-0.0164908	-0.0664958	-0.0435854	-0.0299947	-0.0116065
Plate04	203	AAA	4	9	11	CIN8	YEL061C	49	28	110	2922	0.8387	13615	7287	14096	7518	49	27	94	2453	0.8399	13534	7048	13892	7158	50	28	90	2440	0.8606	12662	6713	13024	7006	50	27	141	3562	0.8538	14583	7827	15045	8137	-0.0836047	-0.0353389	-0.0994573	-0.100359	-0.0701006	-0.0310977
Plate08	80	AAA	8	4	8	MNN4	YKL201C	7	82	212	4454	0.837	25896	10865	26223	11051	7	81	214	4764	0.8042	26249	11099	26384	11197	8	82	202	4420	0.803	25994	10848	26370	10983	8	81	198	4528	0.858	26168	10933	26265	10933	-0.0617587	-0.0689378	-0.0448772	-0.0453419	-0.0378056	-0.0430632
Plate08	82	AAA	8	4	10	NA	YKL200C	7	78	220	5115	0.789	26571	11293	26569	11373	7	77	215	4831	0.7711	27188	11581	27483	11582	8	78	216	5020	0.8281	27112	11522	27240	11553	8	77	216	5109	0.8286	27541	11553	27796	11506	-0.0778756	-0.0471058	-0.0581276	-0.0205024	-0.0453312	-0.0399728
Plate10	31	AAA	10	2	7	TPP1	YMR156C	67	36	171	4092	0.8443	9624	4589	10070	4697	67	35	193	4580	0.8655	8580	4359	8713	4212	68	36	165	3908	0.8776	10719	5394	11145	5657	68	35	207	4893	0.8325	8812	4181	8965	4117	0.00785157	-0.0687162	-0.0857307	0.00589023	-0.0236734	-0.127975
Plate11	29	AAA	11	2	5	TOF1	YNL273W	35	40	144	2879	0.7398	17665	7119	18091	7243	35	39	123	2382	0.7617	16118	6632	16416	6729	36	40	136	2709	0.7953	16173	6627	16516	6761	36	39	122	2419	0.7749	17120	7021	17351	7177	-0.00125374	-0.0385289	-0.0362883	-0.0488748	-0.00599435	-0.0399696
Plate09	99	AAA	9	5	3	NA	YLR114C	9	140	195	4200	0.7797	29867	11803	30415	11897	9	139	179	3991	0.8353	29998	11821	30650	12002	10	140	204	4276	0.7782	29779	11738	30407	12023	10	139	190	4234	0.8473	30151	11927	30791	12045	-0.0384158	-0.0387067	-0.0531944	-0.0366132	-0.0350971	-0.030537
Plate08	42	AAA	8	2	18	ZRT3	YKL175W	3	62	180	3839	0.803	23984	9899	24020	9996	3	61	179	3851	0.7499	24447	10080	24573	10154	4	62	173	3716	0.7658	24294	9994	24296	9929	4	61	178	3880	0.7424	24419	10026	24547	9974	-0.0703849	-0.0549359	-0.0435728	-0.0332731	-0.0416193	-0.0343192
Plate14	138	AAA	14	6	18	ADY4	YLR227C	75	110	151	3670	0.8528	22546	12193	23078	12459	75	109	170	4026	0.8666	24099	12758	24867	13166	76	110	160	3757	0.8263	23036	12465	24034	12830	76	109	166	3915	0.861	24148	13075	25108	13303	-0.0979718	-0.0516084	-0.0720383	-0.0496723	-0.0794249	-0.0362912
Plate06	60	AAA	6	3	12	PSD2	YGR170W	37	74	160	3836	0.84	18294	10106	19241	10260	37	73	159	3810	0.8257	18520	10379	19370	10519	38	74	165	3949	0.8517	18253	10076	19275	10202	38	73	161	3854	0.8401	18802	10502	19616	10812	-0.0171223	-0.0414428	-0.0066461	-0.0603486	-0.0436757	-0.0621699
Plate06	307	AAA	6	13	19	YSC84	YHR016C	57	60	171	4066	0.8812	22681	12930	23507	13010	57	59	166	4156	0.8349	23842	13714	24845	13774	58	60	168	4181	0.8495	23594	13281	24481	13383	58	59	146	3698	0.8618	23521	13129	24524	13322	-0.043324	-0.0387845	-0.0212377	-0.0122902	-0.063109	-0.0700818
Plate09	335	AAA	9	14	23	DUS3	YLR401C	27	100	164	3450	0.7049	27657	10730	28407	10789	27	99	190	4005	0.709	28817	11448	29475	11397	28	100	186	4041	0.7742	28321	10962	28989	10958	28	99	171	3613	0.7923	27813	10990	28367	11052	-0.00953226	-0.0276716	0.000370982	-0.0443609	-0.0222937	-0.0477757
Plate04	299	AAA	4	13	11	GAL83	YER027C	57	28	167	4319	0.85	11330	5996	11846	6025	57	27	168	4297	0.8308	11655	6197	12243	6287	58	28	167	4129	0.8366	11064	5794	11639	6001	58	27	171	4365	0.8786	11659	6180	12117	6174	-0.0244541	-0.0365046	-0.0446499	-0.0259404	-0.0588911	-0.0647936
Plate09	39	AAA	9	2	15	PEX30	YLR324W	3	116	182	3830	0.7455	26965	10457	27553	10527	3	115	191	4011	0.8005	26843	10485	27281	10590	4	116	185	3970	0.7804	27077	10490	27209	10477	4	115	198	4305	0.7727	26930	10584	27154	10686	-0.0229709	-0.0462477	-0.0357942	-0.0656068	-0.0261094	-0.0366738
Plate03	42	AAA	3	2	18	PLP1	YDR183W	3	110	120	2671	0.8193	29253	14344	31385	14877	3	109	125	2853	0.799	30012	14509	31762	15138	4	110	94	2242	0.8028	27294	12801	29342	13348	4	109	131	3047	0.7504	30596	15330	32364	15668	-0.0385411	-0.0351069	-0.0454171	-0.0370191	-0.0777057	-0.043966
Plate09	253	AAA	9	11	13	NA	YLR164W	21	120	234	5190	0.7883	29080	11407	29251	11426	21	119	224	5095	0.8363	28974	11421	29233	11356	22	120	221	5057	0.7504	29575	11661	29824	11706	22	119	212	4900	0.7963	29343	11546	29640	11546	-0.0427594	-0.0353361	-0.0461927	-0.0368545	-0.0290592	-0.036288
Plate02	344	AAA	2	15	8	NA	YCL022C	29	82	86	1990	0.9099	24330	14473	25446	15277	29	81	155	3586	0.8735	22989	14044	23702	13736	30	82	128	2988	0.8429	25424	14402	26748	14669	30	81	102	2409	0.9147	24428	14031	25842	14767	-0.0932075	-0.0666281	0.0386616	-0.0245043	-0.0742585	-0.12279
Plate07	198	AAA	7	9	6	AYR1	YIL124W	49	134	138	3176	0.8806	15201	7145	16144	7430	49	133	126	3092	0.8331	16352	7709	17041	7831	50	134	129	3041	0.8404	15599	7278	16438	7440	50	133	126	2952	0.8387	15561	7355	16499	7675	-0.0630561	-0.0398674	-0.0351444	-0.0678116	-0.0560677	-0.0351968
Plate13	291	AAA	13	13	3	SKS1	YPL026C	89	92	125	2860	0.8126	16803	8670	17505	9433	89	91	139	3258	0.8984	15934	8576	16857	8864	90	92	89	2122	0.8756	15600	7754	16243	8207	90	91	99	2312	0.8732	15352	7739	16014	8053	-0.118263	-0.0920109	-0.0450542	-0.0413279	-0.0603032	-0.126916
Plate11	143	AAA	11	6	23	MID1	YNL291C	43	4	147	3175	0.8159	12772	5182	13133	5228	43	3	143	3041	0.8545	13274	5144	13594	5207	44	4	156	3279	0.8004	12890	5109	13292	5221	44	3	151	3272	0.8434	13950	5704	14091	5804	-0.0283928	0.0303958	-0.00795384	-0.061383	-0.054713	0.0149659
Plate01	243	AAA	1	11	3	NA	YBL094C	21	44	170	3958	0.8357	23196	13187	23920	13404	21	43	128	3036	0.8503	26043	14061	27107	14669	22	44	171	4136	0.8615	25625	14327	26542	14386	22	43	173	4000	0.8348	23166	13224	23924	13635	-0.042849	0.0291077	0.0227045	-0.0655505	-0.0754206	0.0157427
Plate13	64	AAA	13	3	16	NPT1	YOR209C	69	66	101	2362	0.883	10059	4795	10658	4990	69	65	126	3007	0.8151	10987	5254	11592	5550	70	66	129	3094	0.9053	10390	5100	10732	5324	70	65	117	2668	0.8496	9579	4601	9946	4741	-0.0305332	-0.0414246	-0.105882	-0.0703552	-0.0539997	-0.0396165
Plate01	51	AAA	1	3	3	HEK2	YBL032W	5	44	154	3603	0.8605	17704	9597	18036	9805	5	43	169	3730	0.8618	17507	9503	18087	9700	6	44	137	3300	0.8563	17955	9518	18125	9829	6	43	149	3429	0.859	17742	9476	18103	9812	-0.0553362	-0.0364517	-0.0510916	-0.0506144	-0.0561221	-0.0596989
Plate04	238	AAA	4	10	22	NA	YER093C-A	51	6	151	3476	0.8089	21482	11294	23098	11809	51	5	153	3659	0.8721	22301	12019	23413	12078	52	6	161	3795	0.8101	23062	12341	24131	12405	52	5	149	3505	0.791	21612	11624	22596	11970	0.00145712	-0.0104199	-0.0036306	-0.0500273	-0.03369	-0.0682149
Plate01	129	AAA	1	6	9	UBS1	YBR165W	11	32	179	4231	0.8343	15304	8008	15960	8334	11	31	166	3930	0.8418	15439	8101	15843	8489	12	32	174	4015	0.8323	14869	7797	15512	8118	12	31	176	3948	0.8665	14754	7954	15285	8443	-0.0228361	-0.0590498	-0.0308797	-0.106611	-0.0297383	-0.0322385
Plate02	194	AAA	2	9	2	NA	YBR281C	17	94	172	3955	0.8501	31298	18874	31473	19306	17	93	162	3775	0.8222	31418	19115	31606	19923	18	94	167	3871	0.8762	30573	18360	31066	19316	18	93	166	3888	0.816	29028	18394	29632	18946	-0.0603004	-0.0942572	-0.0816846	-0.131746	-0.0311749	-0.041848
Plate07	226	AAA	7	10	10	NA	YJL163C	51	126	121	2957	0.8198	18814	9324	19880	9604	51	125	126	3004	0.8769	19060	9406	20404	9840	52	126	124	3016	0.8416	18732	9235	20250	9580	52	125	128	3075	0.8349	19072	9436	20318	9483	-0.0408393	-0.0282208	-0.00742776	0.0107211	-0.0509886	-0.0411413
Plate01	92	AAA	1	4	20	NA	YBR032W	7	10	142	3220	0.8102	10856	5553	11424	5775	7	9	152	3407	0.8465	10715	5421	11253	5554	8	10	144	3311	0.858	10996	5698	11605	5919	8	9	145	3370	0.8519	11039	5593	11396	5689	-0.0378654	-0.00819898	-0.0471026	-0.0213286	-0.0465995	-0.0333999
Plate02	283	AAA	2	12	19	ENT1	YDL161W	23	60	193	4526	0.8499	19988	11337	20609	11650	23	59	177	4188	0.8648	19722	11069	20490	11345	24	60	192	4646	0.8209	20548	11670	21174	11691	24	59	179	4200	0.8832	18544	10462	19183	10471	-0.071848	-0.0462443	-0.0337946	-0.0451496	-0.0562486	-0.0452786
Plate02	161	AAA	2	7	17	NA	YCL056C	13	64	179	4128	0.8758	21820	12550	22265	13058	13	63	181	4235	0.8452	21374	12301	21747	12950	14	64	180	4221	0.8463	22509	12862	22824	13007	14	63	171	4107	0.84	21537	12456	21993	12431	-0.0992139	-0.125489	-0.0549566	-0.0542305	-0.0548046	-0.0603269
Plate07	39	AAA	7	2	15	NUC1	YJL208C	35	116	114	2659	0.8299	19222	9241	20062	9670	35	115	116	2642	0.8364	18273	8900	19455	9165	36	116	136	3018	0.833	19055	9573	20382	9949	36	115	120	2854	0.8014	19098	9676	19665	9834	-0.0343698	-0.0181895	-0.0436684	-0.0881038	-0.00498701	-0.0388946
Plate14	254	AAA	14	11	14	NA	YPR053C	85	118	140	3631	0.8646	29046	16201	29606	16833	85	117	128	3207	0.8366	29253	15869	29936	16733	86	118	138	3554	0.819	29183	16404	29632	17047	86	117	158	3829	0.8504	28953	16860	29534	17101	-0.0835796	-0.0579977	-0.0979103	-0.107282	-0.0555271	-0.0174525
Plate04	59	AAA	4	3	11	NA	YEL008W	37	28	114	2849	0.8841	15414	8134	16493	8403	37	27	100	2469	0.8943	14700	7758	15796	8242	38	28	110	2833	0.8569	15123	8061	16161	8525	38	27	114	2799	0.8685	15896	8507	16895	8916	-0.0112279	-0.0471081	-0.061501	-0.0599675	-0.0468495	-0.0481389
Plate06	122	AAA	6	6	2	YPT35	YHR105W	43	94	121	2771	0.8599	10826	5756	11676	5950	43	93	124	2969	0.8618	11481	6128	12104	6391	44	94	128	3007	0.8356	11741	6226	12087	6345	44	93	108	2754	0.8399	11887	6276	12425	6434	-0.0259424	-0.0682059	-0.0605146	-0.0374667	-0.0605751	-0.0566674
Plate09	67	AAA	9	3	19	XDJ1	YLR090W	5	108	163	3481	0.793	23752	9165	23753	9079	5	107	177	3774	0.7636	25189	9600	25579	9671	6	108	183	4014	0.8011	26294	10272	26599	10334	6	107	175	3869	0.7951	26113	10099	26538	10106	-0.0526028	-0.0229705	-0.0520391	-0.0254736	-0.0436885	-0.0153859
Plate09	158	AAA	9	7	14	NA	YLR016C	13	118	212	4924	0.7605	28260	11124	28483	11083	13	117	199	4560	0.6757	27243	10642	27475	10591	14	118	196	4488	0.7838	27236	10613	27519	10558	14	117	195	4477	0.7881	27593	10719	27845	10643	-0.0419286	-0.0355156	-0.0288412	-0.0216505	-0.0383885	-0.0341767
Plate09	260	AAA	9	11	20	NA	YLR041W	21	106	194	4194	0.7875	26538	10428	26876	10424	21	105	189	4248	0.8229	26892	10449	27310	10367	22	106	187	4127	0.7385	26768	10356	27190	10472	22	105	189	4167	0.781	26803	10397	27473	10439	-0.0478392	-0.0158478	-0.0362205	-0.0160745	-0.0467997	-0.0292237
Plate02	302	AAA	2	13	14	MAL31	YBR298C	25	70	172	4060	0.8662	22108	12840	23058	12767	25	69	178	4120	0.8548	21223	12189	21897	12660	26	70	188	4565	0.896	22391	12712	23106	12591	26	69	179	4200	0.904	21037	12087	21743	12431	-0.0145192	-0.0850157	0.00690615	-0.0722558	-0.0647069	-0.0592045
Plate07	211	AAA	7	9	19	NA	YJL016W	49	108	137	3148	0.8428	23211	12063	24447	12281	49	107	133	3039	0.8539	22536	11735	23798	11846	50	108	139	3139	0.8171	22688	11774	24216	12014	50	107	135	3147	0.8027	23414	12293	24233	12322	-0.00511002	-0.00487272	0.00641305	-0.0237299	-0.0377776	-0.0507198
Plate02	255	AAA	2	11	15	MAK32	YCR019W	21	68	169	4179	0.8111	23748	13761	23798	14075	21	67	177	4382	0.8489	22653	13214	22748	13733	22	68	178	4386	0.8763	23869	13799	23619	14242	22	67	177	4263	0.8633	22573	13165	22446	13719	-0.0921043	-0.131187	-0.119435	-0.15095	-0.0451524	-0.0648683
Plate08	38	AAA	8	2	14	NA	YKL177W	3	70	192	4253	0.6953	24478	10063	24512	10109	3	69	181	3907	0.7976	23379	9646	23550	9643	4	70	184	4057	0.8096	23762	9708	23986	9751	4	69	187	4173	0.795	24908	10220	25136	10219	-0.0530783	-0.0543446	-0.0400872	-0.0274246	-0.0301225	-0.0489384
Plate14	304	AAA	14	13	16	ROX1	YPR065W	89	114	142	3649	0.8436	31382	18495	32070	19167	89	113	118	2931	0.8347	31603	17926	32650	18596	90	114	116	2937	0.8884	31166	17752	31650	18492	90	113	122	3072	0.866	31220	17461	32065	18318	-0.111495	-0.0447813	-0.0897077	-0.0564914	-0.100484	-0.0495435
Plate06	249	AAA	6	11	9	GPA1	YHR005C	53	80	96	NA	NA	1157	303	1127	258	53	79	NA	NA	NA	NA	NA	NA	NA	54	80	95	NA	NA	1133	306	1104	254	54	79	NA	NA	NA	NA	NA	NA	NA	-0.0153691	NA	-0.035404	NA	-0.0248022	NA
Plate12	271	AAA	12	12	7	GAC1	YOR178C	55	84	163	3466	0.8095	20011	8113	20393	8224	55	83	132	3045	0.816	22027	9177	22109	9111	56	84	146	3152	0.8241	20530	8262	20966	8465	56	83	155	3392	0.8782	20590	8289	20599	8450	-0.0321642	-0.0408072	-0.0275005	-0.052671	-0.0384808	-0.0544509
Plate07	117	AAA	7	5	21	DAL81	YIR023W	41	104	64	1371	0.8294	NA	8676	NA	8708	41	103	69	1538	0.8427	18600	9030	19561	9244	42	104	68	1525	0.7516	17695	8690	18976	8820	42	103	47	1027	0.8253	NA	7994	NA	8376	NA	-0.0199362	-0.0114013	NA	NA	-0.0287191
Plate07	135	AAA	7	6	15	REC107	YJR021C	43	116	136	3178	0.8324	20688	10500	21947	10693	43	115	133	3224	0.8547	21185	10804	22332	11163	44	116	133	3194	0.8403	21333	10811	22604	11056	44	115	140	3235	0.8062	21338	10919	22724	11397	-0.0114385	-0.0361122	-0.00424666	-0.0331496	-0.0483424	-0.0461203
Plate04	247	AAA	4	11	7	RBF20	YER007C-A	53	36	146	3902	0.885	14425	7655	14554	7867	53	35	158	3945	0.8364	13948	7347	14391	7640	54	36	147	3917	0.8514	14314	7633	14477	8020	54	35	156	4064	0.8798	15044	7962	15627	8351	-0.101104	-0.0760656	-0.136221	-0.0815231	-0.0564832	-0.0466551
Plate10	44	AAA	10	2	20	NA	YMR034C	67	10	183	4334	0.8789	9180	4259	9336	4281	67	9	96	NA	NA	886	371	774	302	68	10	172	4356	0.8127	9307	4214	9517	4332	68	9	136	3438	0.7951	8148	3658	8343	3776	0.0158716	-0.401273	0.0295421	0.011321	0.00644558	-0.329237
Plate08	314	AAA	8	14	2	NAP1	YKR048C	27	94	195	3954	0.7928	28576	12303	29236	12548	27	93	195	3971	0.8232	28550	12314	29104	12313	28	94	191	4004	0.7712	29147	12803	29903	12877	28	93	198	4175	0.858	28848	12186	29530	12378	-0.0491284	-0.0326508	-0.044775	-0.0156829	-0.0346984	-0.0373042
Plate10	122	AAA	10	6	2	NA	YMR086C-A	75	46	201	4798	0.8416	9109	4589	9194	4448	75	45	191	4899	0.8656	9901	4799	9864	4802	76	46	143	3384	0.8761	8346	4015	8628	4162	76	45	192	4643	0.8663	9380	4515	9563	4552	-0.0591927	-0.0537213	-0.067768	-0.0296188	-0.107264	-0.0416397
Plate14	46	AAA	14	2	22	PUS2	YGL063W	67	102	167	3884	0.8129	17994	9511	18570	9624	67	101	136	3140	0.8044	18815	9928	18899	9954	68	102	139	3489	0.855	19789	9893	20126	10251	68	101	143	3331	0.7796	17261	8967	17343	8971	-0.0946415	-0.112598	-0.0544264	-0.106308	-0.0900075	-0.0803686
Plate12	273	AAA	12	12	9	MPC54	YOR177C	55	80	137	3023	0.8127	21063	8752	21261	8868	55	79	148	3315	0.8474	21751	8970	21982	9024	56	80	157	3524	0.7939	21953	8922	22174	9078	56	79	141	3305	0.8557	21898	8821	21856	8834	-0.0670619	-0.0373776	-0.0314327	-0.018603	-0.0611444	-0.0439115
Plate11	209	AAA	11	9	17	RNH201	YNL072W	49	16	NA	NA	NA	NA	NA	NA	NA	49	15	NA	NA	NA	NA	NA	NA	NA	50	16	186	NA	NA	4244	782	4202	718	50	15	NA	NA	NA	NA	NA	NA	NA	NA	NA	-0.0265639	NA	NA	NA
Plate02	220	AAA	2	10	4	BSC1	YDL037C	19	90	146	3279	0.8363	30779	18696	31739	19773	19	89	149	3443	0.8544	33203	20921	33487	22064	20	90	153	3586	0.8455	32388	19924	32909	20251	20	89	153	3576	0.8163	31884	19498	32031	20397	-0.0778014	-0.133515	-0.0509194	-0.103327	-0.0449551	-0.0733448
Plate10	128	AAA	10	6	8	CTF18	YMR078C	75	34	97	2528	0.8839	8109	3891	8498	4009	75	33	96	2667	0.8594	9374	4604	9923	4794	76	34	116	3006	0.8697	8461	4100	8742	4301	76	33	83	2141	0.8693	7096	3340	7422	3486	-0.0408065	-0.0422888	-0.0917051	-0.0614851	-0.0586674	-0.0681341
Plate01	223	AAA	1	10	7	MSI1	YBR195C	19	36	172	4076	0.8048	16851	9112	17267	9621	19	35	187	4306	0.8219	16461	8775	16996	9176	20	36	183	4252	0.8313	16798	8864	17252	9160	20	35	188	4215	0.8145	16771	8892	17355	9261	-0.0965443	-0.0567357	-0.0314629	-0.0371739	-0.0603555	-0.0443896
Plate07	31	AAA	7	2	7	NA	YJL213W	35	132	128	2981	0.8537	18018	8904	18982	8841	35	131	142	3289	0.858	19666	9536	20671	9769	36	132	130	3051	0.8827	17302	8534	17941	8592	36	131	128	3159	0.81	18161	8776	18849	8864	-0.0138404	0.00214305	-0.0708753	-0.0286142	-0.0621383	-0.00801721
Plate01	269	AAA	1	12	5	ERV15	YBR210W	23	40	189	4458	0.8486	22161	12290	22371	12824	23	39	196	4478	0.8579	22005	12205	22375	12534	24	40	178	4182	0.853	22458	12421	22740	12887	24	39	195	4507	0.8425	22406	12177	22876	12582	-0.0865207	-0.0554649	-0.0679185	-0.0265125	-0.0500326	-0.0514429
Plate04	331	AAA	4	14	19	NA	YFL054C	59	12	120	3025	0.8124	17624	8859	18382	9369	59	11	127	3363	0.8596	17331	9532	17592	9925	60	12	147	3563	0.8151	16811	9777	17941	10111	60	11	129	3183	0.8825	18378	9111	19383	9626	-0.00646371	-0.152668	-0.15015	0.0330232	0.0258324	-0.103342
Plate08	339	AAA	8	15	3	KKQ8	YKL168C	29	92	182	3733	0.7646	29716	13113	30415	13236	29	91	195	4019	0.794	29015	12149	29658	12231	30	92	168	3426	0.837	30080	13406	30558	13571	30	91	188	3842	0.7473	29952	13044	30571	13200	-0.0512013	0.00639796	-0.0744821	-0.0394116	-0.0491581	0.00599135
Plate10	358	AAA	10	15	22	AMD1	YML035C	93	6	167	3952	0.8294	8607	4243	8709	4295	93	5	141	3039	0.8519	6987	3362	7245	3460	94	6	96	2280	0.8425	7778	3577	7940	3622	94	5	114	2662	0.7686	7387	3522	7714	3575	-0.0956571	-0.0886033	-0.00897774	-0.0359202	-0.0863669	-0.0853635
Plate14	85	AAA	14	4	13	NA	YGR291C	71	120	175	4265	0.8348	22746	12026	23331	11924	71	119	164	3987	0.8599	21569	11557	22230	11628	72	120	176	4332	0.8353	22087	11654	22728	11411	72	119	156	3864	0.8557	21934	11674	22470	11730	-0.0232938	-0.0662638	-0.00669832	-0.0608681	-0.0473139	-0.0761193
Plate08	199	AAA	8	9	7	PRR1	YKL116C	17	84	159	3493	0.7618	26748	11129	27094	11098	17	83	156	3378	0.7492	26693	11190	27402	11168	18	84	185	4052	0.8256	27620	11874	28175	11956	18	83	151	3402	0.812	27011	11486	27449	11415	-0.0150957	-0.00511177	-0.0477422	-0.0304619	-0.0160493	-0.026308
Plate01	77	AAA	1	4	5	APD1	YBR151W	7	40	155	3844	0.8869	19617	10526	18952	10599	7	39	175	4221	0.8553	18704	9954	18424	10163	8	40	130	3186	0.8557	17398	9667	17349	9762	8	39	161	4016	0.862	19416	10393	19086	10455	-0.0845394	-0.0711576	-0.10895	-0.0552516	-0.0258566	-0.0223436
Plate06	198	AAA	6	9	6	AMA1	YGR225W	49	86	115	2735	0.8501	12815	6902	13573	7128	49	85	110	2648	0.8934	12419	6723	13158	7020	50	86	119	2789	0.8534	12815	6822	13616	7098	50	85	111	2692	0.8951	13383	7144	14233	7431	-0.0431592	-0.0693497	-0.032588	-0.0283483	-0.0531123	-0.0644948
Plate14	133	AAA	14	6	13	POG1	YIL122W	75	120	106	2507	0.8437	17418	9133	18279	9470	75	119	93	2254	0.7521	16686	8553	17620	8855	76	120	132	3126	0.8592	20523	10875	21141	11204	76	119	99	2412	0.8847	18825	9518	19929	9967	-0.0974805	-0.0643772	-0.0958318	-0.0321801	-0.0843324	-0.0602241
Plate07	112	AAA	7	5	16	NA	YIL086C	41	114	125	3098	0.8347	21715	11066	22772	11202	41	113	132	2986	0.8252	21240	11004	22462	11383	42	114	129	3106	0.8425	21370	10920	22485	11236	42	113	133	3118	0.8439	22171	11271	23652	11671	-0.00830261	-0.0507275	-0.0329433	0.00339728	-0.0364987	-0.065172
Plate12	153	AAA	12	7	9	ATG19	YOL082W	45	80	216	5227	0.8096	21581	8876	21671	8950	45	79	208	5007	0.8079	21527	8713	21713	8813	46	80	201	4741	0.8201	21071	8600	21150	8697	46	79	215	5078	0.8823	21180	8642	21367	8728	-0.0490838	-0.0258178	-0.0496185	-0.0383169	-0.0421234	-0.0213593
Plate01	245	AAA	1	11	5	SCS22	YBL091C-A	21	40	148	3356	0.829	15630	8176	16444	8559	21	39	137	3113	0.8305	16951	9008	17838	9550	22	40	127	2968	0.9008	16792	9015	17496	9627	22	39	127	2917	0.8702	16628	8921	17632	9475	-0.0131359	-0.036642	-0.077185	-0.0437951	-0.0262197	-0.0356817
Plate07	147	AAA	7	7	3	NA	YJL007C	45	140	136	3223	0.8517	16716	7986	17728	8222	45	139	121	2931	0.8744	16288	7723	17371	7950	46	140	123	2877	0.9023	15789	7437	16821	7647	46	139	137	3251	0.8712	16729	7948	17573	8043	-0.0356942	-0.027188	-0.0315648	-0.0227019	-0.0446452	-0.043829
Plate11	262	AAA	11	11	22	ADH2	YMR303C	53	6	170	3636	0.8013	14515	5828	14754	5940	53	5	179	4037	0.7801	15267	6223	15407	6340	54	6	159	3449	0.7564	14460	5871	14707	5944	54	5	157	3261	0.7672	14110	5660	14343	5749	-0.0235171	-0.0489494	-0.0292572	-0.0214432	-0.0170037	-0.031574
Plate11	87	AAA	11	4	15	ERG24	YNL280C	39	20	184	4261	0.8525	16654	6735	17003	6856	39	19	195	4403	0.7959	16656	6922	16985	7033	40	20	185	4347	0.7232	16776	6696	17085	6785	40	19	188	4269	0.739	16521	6811	16878	7003	-0.0133663	-0.0511305	0.00845976	-0.054305	-0.0134627	-0.0520509
Plate06	123	AAA	6	6	3	NA	YIL006W	43	92	136	3192	0.8046	12020	6478	12836	6564	43	91	138	3229	0.821	12671	6784	13386	6908	44	92	124	3085	0.8668	12427	6532	13174	6679	44	91	138	3224	0.7841	12197	6535	12899	6714	-0.015222	-0.0212801	0.000569937	-0.0386231	-0.0630504	-0.0465058
Plate07	254	AAA	7	11	14	RBF108	YIL137C	53	118	128	3168	0.7937	20140	10133	21312	10499	53	117	138	3194	0.8467	20310	10287	21327	10599	54	118	133	3174	0.8505	20373	10189	21504	10625	54	117	132	3188	0.8675	20499	10281	21523	10593	-0.0370584	-0.0476561	-0.037093	-0.0319002	-0.0466194	-0.0521715
Plate08	87	AAA	8	4	15	CCP1	YKR066C	7	68	204	4533	0.8101	25881	10818	26237	10840	7	67	185	4489	0.8087	24971	10646	25237	10852	8	68	200	4496	0.8198	25791	10720	26256	10822	8	67	195	4537	0.8526	26404	10767	26637	10852	-0.0360017	-0.099211	-0.0327	-0.013323	-0.0332194	-0.0703571
Plate10	307	AAA	10	13	19	PLB1	YMR008C	89	12	164	4099	0.8745	9169	4716	9483	4751	89	11	114	2815	0.8378	7818	3660	8245	3756	90	12	127	3123	0.8025	7473	3576	7636	3554	90	11	121	2979	0.8265	8599	3994	8958	4188	-0.100081	0.000254837	-0.0436624	-0.0182993	-0.134562	-0.0306124
Plate06	314	AAA	6	14	2	NA	YHR159W	59	94	167	3943	0.8372	15190	8222	15746	8519	59	93	150	3801	0.8472	15676	8512	15918	8785	60	94	163	3810	0.8642	15015	8229	15551	8268	60	93	154	3809	0.8127	15328	8396	15810	8850	-0.0632847	-0.0891894	-0.0410018	-0.109609	-0.0378379	-0.0383328
Plate08	112	AAA	8	5	16	ATP2	YJR121W	9	66	187	4186	0.7677	24011	9823	24438	9880	9	65	190	4139	0.8347	24367	9983	25007	9998	10	66	194	4301	0.7567	24135	9966	24621	10104	10	65	186	4226	0.7487	24565	10092	25174	10183	-0.0279102	-0.00705874	-0.0454156	-0.0204344	-0.0298904	-0.0271528
Plate13	29	AAA	13	2	5	NA	YPL168W	67	88	99	2701	0.8367	24949	13161	25549	13315	67	87	115	2912	0.8137	21405	11598	20411	11112	68	88	NA	NA	NA	NA	NA	NA	NA	68	87	125	2986	0.7814	14890	7605	15655	7915	-0.00830231	-0.105184	NA	-0.0528957	-0.0231257	-0.0850957
Plate11	226	AAA	11	10	10	NA	YNL211C	51	30	187	4468	0.8455	19775	8082	20220	8206	51	29	193	4413	0.8192	19459	7876	19782	8025	52	30	173	4070	0.7677	19501	7937	19893	8040	52	29	189	4354	0.8348	19426	8020	19789	8244	-0.0225338	-0.0210894	-0.0158396	-0.0599253	-0.0267667	-0.012129
Plate02	37	AAA	2	2	13	RPS16B	YDL083C	3	72	136	3227	0.8373	38059	26393	39652	28377	3	71	131	3076	0.8298	37642	23873	39402	25591	4	72	122	2971	0.8041	36233	21370	37862	22653	4	71	138	3264	0.8256	37314	23330	38452	24591	-0.184399	-0.0626168	0.0293755	-0.0508825	-0.160935	-0.0476239
Plate02	215	AAA	2	9	23	NA	YCL074W	17	52	185	4208	0.8453	16065	8739	16648	8912	17	51	185	4258	0.8373	16346	8876	16601	9133	18	52	179	4221	0.7861	16784	9286	17002	9563	18	51	182	4308	0.8546	16810	9193	17038	9641	-0.0574503	-0.0939639	-0.11658	-0.123885	-0.0500123	-0.0436985
Plate12	302	AAA	12	13	14	TOS7	YOL019W	57	70	178	3873	0.79	21221	8598	21790	8808	57	69	211	4747	0.8372	22157	9217	22635	9473	58	70	195	4488	0.8615	22646	9224	23023	9440	58	69	195	4264	0.8486	21639	8880	22131	9096	-0.0195019	-0.0538892	-0.0221988	-0.0370853	-0.0258601	-0.0509753
Plate04	99	AAA	4	5	3	SPF1	YEL031W	41	44	98	2608	0.8404	10805	5606	10976	5711	41	43	101	2786	0.8574	11372	6169	11398	6255	42	44	90	2392	0.8829	10591	5474	10951	5665	42	43	107	2856	0.812	11672	6159	11802	6321	-0.0604995	-0.134148	-0.0523915	-0.0979558	-0.0320475	-0.0941315
Plate07	212	AAA	7	9	20	SDP1	YIL113W	49	106	130	3116	0.8755	23723	12328	24998	12394	49	105	135	3055	0.8025	23266	12343	24507	12472	50	106	134	3169	0.8343	23731	12328	25003	12483	50	105	135	3201	0.8369	24256	12849	25201	12889	0.0203336	-0.0201427	0.0118228	-0.0146979	-0.0298829	-0.062957
Plate11	76	AAA	11	4	4	BNI5	YNL166C	39	42	185	4090	0.831	19591	8105	19988	8262	39	41	198	4437	0.8462	20079	8170	20334	8299	40	42	185	4138	0.8424	20110	8185	20375	8263	40	41	182	4105	0.8357	19599	7936	19791	7974	-0.0488907	-0.0310744	-0.0218401	-0.0111382	-0.0442415	-0.0208825
Plate06	245	AAA	6	11	5	NA	YHR009C	53	88	119	3109	0.8487	17587	10022	18343	10392	53	87	128	3406	0.8885	20334	11020	21159	11540	54	88	129	3419	0.8656	19317	10556	19901	10876	54	87	125	3171	0.8298	18707	10513	19637	11104	-0.106776	-0.036242	-0.046774	-0.0955054	-0.0912977	-0.00507142
Plate11	275	AAA	11	12	11	NA	YNL338W	55	28	168	3969	0.7973	20417	8404	20815	8578	55	27	199	4656	0.7742	20402	8260	20747	8383	56	28	176	4190	0.8049	20582	8365	20995	8574	56	27	185	4321	0.8079	20342	8303	20690	8487	-0.0466262	-0.0173877	-0.0337924	-0.0394207	-0.0386081	-0.0142741
Plate14	76	AAA	14	4	4	VHS3	YOR054C	71	138	107	2384	0.8777	12100	6080	12467	6159	71	137	115	2570	0.893	12659	6345	13398	6425	72	138	110	2453	0.8806	13746	6864	14523	7143	72	137	77	1818	0.8567	12877	6239	13220	6380	-0.113372	-0.0585095	-0.075605	-0.0697955	-0.0814961	-0.0714133
Plate07	125	AAA	7	6	5	GEA1	YJR031C	43	136	158	3835	0.8552	19637	9768	20343	10152	43	135	164	3956	0.8169	19612	9745	20407	10226	44	136	162	3926	0.8492	19265	9614	20055	9961	44	135	160	3928	0.8639	19614	9706	20364	9860	-0.0718881	-0.0757374	-0.0717564	-0.0339674	-0.0409208	-0.0399861
Plate13	87	AAA	13	4	15	CUP9	YPL177C	71	68	124	2930	0.8691	10696	5274	11210	5481	71	67	110	2910	0.7901	12955	6298	12062	6090	72	68	101	2683	0.8858	11730	5844	11647	5815	72	67	75	2090	0.8319	15150	7579	14998	7724	-0.0768123	-0.103613	-0.096253	-0.0859969	-0.0862286	-0.0284061
Plate12	338	AAA	12	15	2	PEX15	YOL044W	61	94	107	1973	0.7335	14253	5619	14363	5714	61	93	76	1532	0.615	14663	5699	15314	5858	62	94	89	1701	0.51	13991	5319	14272	5424	62	93	69	1251	0.578	NA	4798	NA	4884	-0.0723272	-0.00733496	-0.0122921	NA	-0.056076	-0.0313298
Plate06	210	AAA	6	9	18	RTA1	YGR213C	49	62	168	4133	0.8667	23283	13201	24667	13416	49	61	170	4225	0.8521	24377	13806	25580	13774	50	62	176	4271	0.8274	23144	13065	24370	13127	50	61	175	4343	0.8219	24458	13756	25464	14192	-0.0132469	0.00508214	-0.00141562	-0.0430355	-0.0526692	-0.0461546
Plate14	108	AAA	14	5	12	ICL2	YPR006C	73	122	145	3322	0.8447	19063	9788	19869	9716	73	121	163	3669	0.8891	19422	9940	20318	10037	74	122	145	3306	0.8624	19470	10209	20325	10115	74	121	136	3140	0.8279	18306	9673	19377	10032	-0.00276047	-0.0115544	-0.0213468	-0.0843771	-0.0410796	-0.0335465
Plate06	177	AAA	6	8	9	MNT3	YIL014W	47	80	153	3929	0.8416	17468	9683	18511	10097	47	79	151	3939	0.8621	18202	9886	18816	10349	48	80	157	3921	0.8683	17483	9750	18333	10204	48	79	156	3892	0.8705	17897	9877	18912	10434	-0.0533435	-0.062685	-0.082435	-0.0662932	-0.0538608	-0.0207818
Plate06	278	AAA	6	12	14	ARO9	YHR137W	55	70	142	3497	0.7904	15123	8256	16203	8370	55	69	164	3993	0.8679	15430	8437	16240	8673	56	70	158	3890	0.8675	15606	8558	16412	8432	56	69	160	3934	0.84	15929	8603	16639	8702	0.00418411	-0.0413088	0.0133757	-0.00928449	-0.0501873	-0.0498961
Plate04	293	AAA	4	13	5	YPT31	YER031C	57	40	143	3633	0.8424	12797	6769	13144	6913	57	39	144	3607	0.8722	13860	7233	14311	7651	58	40	151	3660	0.8548	12666	6762	13283	6830	58	39	154	3768	0.8487	12720	6694	13471	6923	-0.0670452	-0.0862821	-0.034479	-0.033068	-0.0548293	-0.0335053
Plate02	187	AAA	2	8	19	NA	YDL129W	15	60	163	3910	0.872	23042	13219	22788	13777	15	59	174	4021	0.8456	21344	12342	21576	12898	16	60	164	3962	0.8158	22670	13000	22712	13470	16	59	177	4115	0.8578	21381	12223	21238	12864	-0.132594	-0.132674	-0.108417	-0.154117	-0.0388468	-0.0669352
Plate04	84	AAA	4	4	12	HOR2	YER062C	39	26	177	4152	0.8509	17523	9347	18314	9867	39	25	161	4083	0.8545	18270	9789	18813	10231	40	26	161	4062	0.8617	18049	9409	18717	9626	40	25	175	4390	0.8261	18298	9729	19073	9845	-0.0853191	-0.0971692	-0.018317	-0.0225265	-0.05927	-0.0646714
Plate14	208	AAA	14	9	16	SRO7	YPR032W	81	114	142	3354	0.8573	19603	10304	20052	10101	81	113	125	2960	0.8661	19004	9707	20176	9963	82	114	145	3500	0.8606	19458	10035	20101	10028	82	113	143	3245	0.8492	19470	10307	20511	10407	-0.0404749	-0.0125528	-0.0270085	-0.0451164	-0.0681781	-0.0345075
Plate12	93	AAA	12	4	21	CRC1	YOR100C	39	56	158	3478	0.849	21705	8846	21632	8870	39	55	142	3098	0.8145	19448	8014	19849	8056	40	56	101	2201	0.7362	17349	7026	17140	7150	40	55	101	2075	0.7585	16701	6334	16520	6321	-0.0401553	-0.0463759	-0.108377	0.00492629	-0.0287078	-0.0656799
Plate13	197	AAA	13	9	5	ATF1	YOR377W	81	88	149	3738	0.8521	18728	9475	19039	9610	81	87	153	3683	0.8583	17751	9275	18205	9387	82	88	173	4306	0.8412	18835	9898	19309	9932	82	87	174	4240	0.8455	18461	9797	19099	10102	-0.0147198	-0.0515495	-0.0378131	-0.0775455	-0.0146216	-0.0676511
Plate01	200	AAA	1	9	8	GDH3	YAL062W	17	34	182	4139	0.8806	18826	10302	19541	10755	17	33	183	4362	0.8522	19316	10383	19901	10738	18	34	185	4296	0.8262	20022	10894	20784	11387	18	33	200	4620	0.8659	19933	10703	20824	11185	-0.0572837	-0.0271186	-0.0396185	-0.0125217	-0.0592705	-0.0307963
Plate10	226	AAA	10	10	10	NA	YMR111C	83	30	85	2264	0.8335	9756	4503	9542	4593	83	29	113	2584	0.8397	6201	2977	6406	3074	84	30	140	3348	0.8344	8010	3918	8193	4006	84	29	132	3148	0.872	7140	3394	7319	3514	-0.0450599	-0.119061	-0.0961265	-0.0937734	0.022864	-0.100427
Plate13	201	AAA	13	9	9	GDH1	YOR375C	81	80	103	2558	0.8017	14346	7378	15218	7807	81	79	NA	NA	NA	NA	NA	NA	NA	82	80	118	2941	0.7985	15647	7729	16806	8315	82	79	112	NA	NA	989	208	976	185	-0.0779658	NA	-0.0103526	-0.0475641	-0.0847175	NA
Plate12	173	AAA	12	8	5	SFL1	YOR140W	47	88	88	1926	0.7195	18115	7213	18159	7170	47	87	73	1301	0.6154	NA	5774	NA	5916	48	88	59	1018	0.7075	NA	5431	NA	5344	48	87	94	2000	0.7814	18611	7453	18851	7581	-0.024714	NA	NA	-0.0435622	-0.0307279	NA
Plate11	320	AAA	11	14	8	ATG2	YNL242W	59	34	168	3658	0.8268	20722	8413	21231	8657	59	33	178	3915	0.8961	20838	8513	21312	8646	60	34	183	4060	0.7714	21639	8798	22235	9036	60	33	182	4087	0.7991	21152	8613	21671	8715	-0.0322706	-0.025032	-0.0309871	-0.0133056	-0.0192008	-0.0287142
Plate01	244	AAA	1	11	4	NA	YAR023C	21	42	188	4293	0.8723	20742	11162	21264	11619	21	41	183	4218	0.824	20418	11118	21044	11585	22	42	187	4212	0.8501	20246	11132	20736	11687	22	41	190	4342	0.8303	20402	11128	20805	11554	-0.031719	-0.0437566	-0.0782392	-0.0577006	-0.0205914	-0.0392556
Plate10	356	AAA	10	15	20	NA	YML035C-A	93	10	168	4252	0.8162	12826	6350	12712	6370	93	9	175	4298	0.8077	10483	5224	10713	5246	94	10	94	2643	0.7255	14025	7051	14230	7373	94	9	89	2468	0.8177	12441	6417	12999	6713	-0.0422949	-0.0453152	-0.0644354	-0.0782494	-0.0304151	-0.070676
Plate06	106	AAA	6	5	10	CRH1	YGR189C	41	78	176	4161	0.8684	19005	10544	20165	10890	41	77	165	4228	0.8909	20737	11220	21425	11867	42	78	163	4025	0.8827	18874	10622	19748	10859	42	77	171	4291	0.8981	19107	10775	19869	10970	-0.028704	-0.056011	-0.0562361	-0.0610698	-0.0452507	-0.000596387
Plate01	293	AAA	1	13	5	NA	YBL107C	25	40	156	3520	0.8727	19778	10744	20729	11028	25	39	137	3079	0.8584	19503	10763	20501	11433	26	40	162	3731	0.8505	20762	11046	21908	11252	26	39	132	3013	0.8521	19588	10643	20740	11106	-0.000475409	-0.0661228	0.0574163	-0.00916928	-0.0412957	-0.0650468
Plate04	245	AAA	4	11	5	PAC2	YER007W	53	40	160	4053	0.8506	14161	7453	14424	7796	53	39	175	4266	0.8726	13930	7229	14399	7626	54	40	166	4296	0.8607	13814	7343	13951	7634	54	39	164	4098	0.9013	14494	7768	14667	8087	-0.101391	-0.0726481	-0.120493	-0.128915	-0.045092	-0.0253813
Plate04	327	AAA	4	14	15	AAD6	YFL056C	59	20	143	3978	0.8817	20217	10752	20375	11212	59	19	144	3950	0.8544	19975	10672	20526	11361	60	20	133	3615	0.8289	18754	9828	18886	10201	60	19	144	3900	0.856	20457	10933	20584	11126	-0.109631	-0.117464	-0.0873209	-0.0837312	-0.0516168	-0.05845
Plate02	210	AAA	2	9	18	HSM3	YBR272C	17	62	165	4086	0.8899	17979	9882	18450	10199	17	61	181	4305	0.8608	17450	9426	18030	9654	18	62	164	4167	0.7947	17413	9773	17847	10158	18	61	178	4240	0.8673	17217	9565	17604	9876	-0.0721188	-0.0364835	-0.119209	-0.103936	-0.038407	-0.0220088
Plate10	195	AAA	10	9	3	NGL3	YML118W	81	44	145	3509	0.8296	8421	3896	8693	4057	81	43	182	4465	0.8633	8810	4314	9022	4522	82	44	113	2739	0.8333	8229	3828	8596	3974	82	43	191	4484	0.8924	8829	4530	9170	4662	-0.0218489	-0.110477	-0.0113487	-0.12639	-0.00304758	-0.0736002
Plate13	221	AAA	13	10	5	MMT2	YPL224C	83	88	103	2654	0.8028	19413	9534	19943	9970	83	87	60	1504	0.8558	15269	8503	15423	8508	84	88	154	3638	0.8401	15934	8409	16470	8549	84	87	150	3517	0.8943	20812	10381	22168	10802	0.00644395	-0.173236	-0.0788239	0.0593744	0.0318805	-0.180706
Plate14	79	AAA	14	4	7	PNC1	YGL037C	71	132	134	3093	0.905	16810	8584	17781	8477	71	131	139	3211	0.8698	16900	8679	17398	8538	72	132	132	3124	0.8967	17029	8708	17810	8746	72	131	131	3084	0.8157	17148	8770	17576	8805	0.00810038	-0.0351741	-0.031207	-0.0606623	-0.0538954	-0.0607822
Plate11	292	AAA	11	13	4	NA	YMR326C	57	42	170	3681	0.8124	22602	9164	23163	9408	57	41	169	3803	0.7959	22721	9139	23280	9324	58	42	165	3676	0.8355	22779	9330	23245	9479	58	41	166	3659	0.8377	22597	9135	23251	9275	-0.0342212	-0.0138013	-0.0405752	-0.00765046	-0.0238612	-0.0124649
Plate04	310	AAA	4	13	22	TTR1	YDR513W	57	6	193	4498	0.8674	21733	11553	22242	11544	57	5	171	4200	0.8114	22934	12182	22764	12680	58	6	184	4431	0.8305	22670	12031	22952	12365	58	5	181	4284	0.8431	23164	12398	23118	12569	-0.0220202	-0.120524	-0.0728817	-0.0853733	-0.0492233	-0.0467143
Plate07	330	AAA	7	14	18	RPS22A	YJL190C	59	110	128	3127	0.8238	21959	11169	23163	11242	59	109	136	3200	0.8419	21367	10925	22521	11001	60	110	134	3244	0.8554	22317	11396	23413	11196	60	109	134	3188	0.7653	21395	11023	22509	11102	0.0153238	-0.00412557	0.0380843	-0.016325	-0.0301474	-0.0463948
Plate06	179	AAA	6	8	11	PDR11	YIL013C	47	76	171	4324	0.8646	20504	11398	21380	11730	47	75	174	4480	0.8622	20169	11296	21230	11853	48	76	159	4075	0.8505	19641	10819	20396	11163	48	75	165	4201	0.8138	19820	11103	20602	11542	-0.0431464	-0.0681419	-0.0456969	-0.0766346	-0.0393579	-0.0515812
Plate01	98	AAA	1	5	2	FUN21	YAL031C	9	46	163	3876	0.8694	20519	10782	20229	11017	9	45	154	3716	0.8849	17767	9944	17781	10206	10	46	167	3949	0.8618	19560	10430	19305	10627	10	45	163	3873	0.8161	18496	9998	18472	10316	-0.0366339	-0.131355	-0.059773	-0.0873553	0.00999482	-0.0991859
Plate07	231	AAA	7	10	15	APS2	YJR058C	51	116	140	3270	0.8125	20603	10376	22013	10687	51	115	127	3066	0.837	20484	10150	21369	10040	52	116	133	3120	0.8412	19790	9992	21026	10005	52	115	139	3289	0.806	20014	10021	21118	10065	-0.00580035	0.0227897	0.000513462	0.000272966	-0.0399382	-0.02137
Plate11	359	AAA	11	15	23	DMA2	YNL116W	61	4	152	3166	0.7131	14060	5672	14224	5777	61	3	149	3300	0.7587	15024	6056	15042	6099	62	4	155	3312	0.7438	15587	6270	15570	6267	62	3	146	3016	0.7304	14648	5976	14707	6047	-0.0407377	-0.0309158	-0.0171087	-0.0529335	-0.0283224	-0.0178769
Plate06	105	AAA	6	5	9	DUR3	YHL016C	41	80	103	2639	0.8722	13474	7219	14273	7595	41	79	107	2714	0.8571	13983	7453	14755	7810	42	80	120	2913	0.8523	13454	7394	14651	7845	42	79	118	2951	0.8498	13768	7369	14587	7768	-0.0540661	-0.042175	-0.0590109	-0.0520834	-0.0391841	-0.0272131
Plate04	257	AAA	4	11	17	DLD3	YEL071W	53	16	153	3969	0.8403	19404	10185	20239	10236	53	15	168	4155	0.8637	19320	10150	20411	10179	54	16	176	4482	0.8592	19822	10685	20758	10766	54	15	166	4097	0.8575	19862	10601	20773	10668	0.00947021	0.0298118	-0.0247985	-0.0107914	-0.0338146	-0.0352005
Plate10	250	AAA	10	11	10	SEL1	YML013W	85	30	183	4385	0.8868	10102	5088	10458	5053	85	29	169	4423	0.8664	11233	5565	11489	5579	86	30	166	4092	0.8783	10907	5534	11204	5718	86	29	111	3085	0.8573	12764	6141	12804	6226	-0.0320741	-0.0202111	-0.0920049	-0.000470638	-0.0909376	-0.0519598
Plate13	223	AAA	13	10	7	GRE1	YPL223C	83	84	186	4646	0.8245	19913	10325	20758	10464	83	83	97	58	0.6876	NA	329	NA	269	84	84	151	4129	0.8543	24194	13626	23466	13252	84	83	160	3855	0.8769	20526	10493	21774	11104	0.00211825	NA	-0.131611	-0.00546598	-0.0374231	NA
Plate07	251	AAA	7	11	11	GYP6	YJL044C	53	124	183	4365	0.8769	19794	10017	20857	9972	53	123	175	4366	0.8625	21199	10611	22106	11040	54	124	175	4259	0.8711	20835	10551	21576	10475	54	123	175	4347	0.8668	20956	10562	21866	11073	-0.0086561	-0.0391319	-0.0139643	-0.0608013	-0.0600106	-0.0222032
Plate12	185	AAA	12	8	17	BAG7	YOR134W	47	64	120	2563	0.6698	18090	7218	18672	7226	47	63	146	3218	0.7531	19069	7732	19403	7840	48	64	38	296	0.7173	NA	1529	NA	1423	48	63	109	2384	0.705	18284	7201	18511	7292	0.00705576	-0.0448077	NA	-0.0185198	-0.0337733	-0.0472473
Plate12	306	AAA	12	13	18	ESC8	YOL017W	57	62	183	4125	0.8558	21187	8653	21665	8805	57	61	192	4301	0.7759	21494	8857	21864	9067	58	62	188	4122	0.8448	21249	8679	21673	8891	58	61	171	3676	0.8379	20693	8241	21006	8309	-0.0281082	-0.0520866	-0.0402739	0.00014742	-0.03686	-0.0455578
Plate10	179	AAA	10	8	11	MRPS17	YMR188C	79	28	92	5	10.7802	NA	160	NA	149	79	27	158	4397	0.8219	11191	5208	10897	5188	80	28	164	4220	0.8213	8759	4579	9087	4700	80	27	155	4241	0.8021	11305	5540	11301	5531	NA	-0.00412292	-0.151315	-0.0340327	NA	0.0328636
Plate12	237	AAA	12	10	21	ELG1	YOR144C	51	56	143	3064	0.8166	17985	7320	17965	7233	51	55	155	3320	0.7462	17896	7081	18096	7105	52	56	147	3159	0.7613	17953	7060	18238	7065	52	55	143	3184	0.7572	19431	7773	19630	7806	-0.0529816	-0.0175321	0.00205076	-0.0210524	-0.0617749	-0.0239485
Plate02	118	AAA	2	5	22	NA	YBR238C	9	54	115	2657	0.8834	12300	6477	12650	6438	9	53	132	2838	0.9028	12980	7058	13426	6954	10	54	72	1815	0.9259	13703	6829	14136	7004	10	53	88	2027	0.786	11645	5963	12410	6065	-0.0692957	-0.0745596	-0.00206779	-0.0226173	-0.0712276	-0.100064
Plate12	159	AAA	12	7	15	NA	YOL079W	45	68	188	4471	0.838	20860	8401	20969	8493	45	67	188	4382	0.7484	20704	8290	20862	8340	46	68	154	3537	0.7801	19973	8230	20195	8318	46	67	183	4195	0.8349	20601	8325	20582	8358	-0.0316541	-0.0155116	-0.0624635	-0.0394009	-0.0213805	-0.0151252
Plate07	304	AAA	7	13	16	RRD1	YIL153W	57	114	132	3073	0.8235	16474	7851	17478	7851	57	113	128	2919	0.8708	17019	8018	17778	8125	58	114	124	2917	0.8373	16568	7901	17512	7970	58	113	129	3004	0.8042	16468	7842	17307	7802	-0.001513	-0.0163014	-0.0170552	-0.00984375	-0.0464529	-0.0207692
Plate01	50	AAA	1	3	2	PSK1	YAL017W	5	46	136	3640	0.8322	21643	11475	21331	11677	5	45	136	3491	0.8592	18310	10025	17377	9883	6	46	155	3808	0.8485	17659	9411	17592	9565	6	45	145	3699	0.8256	17590	9543	17407	9815	-0.0335938	-0.12313	-0.0600591	-0.111151	0.00681299	-0.0644409
Plate07	137	AAA	7	6	17	NA	YJR020W	43	112	134	3166	0.8058	22457	11425	23429	11567	43	111	127	3007	0.7556	21938	11334	23241	11601	44	112	138	3060	0.8438	21427	10978	23261	11405	44	111	138	3287	0.8808	22625	11670	23707	11907	-0.00113945	-0.0180483	0.00445803	-0.0175416	-0.0225254	-0.050268
Plate01	287	AAA	1	12	23	BEM1	YBR200W	23	4	139	3204	0.8295	11666	6079	12111	6286	23	3	189	4272	0.8407	13360	7163	13761	7278	24	4	82	1907	0.8186	10696	5152	11110	5299	24	3	140	3219	0.8221	12400	6389	12938	6826	-0.0631603	-0.0662329	0.0357497	-0.0736851	-0.0619167	-0.082434
Plate13	171	AAA	13	8	3	NA	YPL208W	79	92	157	3735	0.8507	19213	10019	19793	10453	79	91	181	4235	0.8638	18507	10029	19241	10376	80	92	NA	NA	NA	NA	NA	NA	NA	80	91	148	3734	0.8044	23288	12004	23277	11934	-0.0692427	-0.102484	NA	-0.0015538	-0.0512727	-0.109853
Plate14	112	AAA	14	5	16	NA	YPR004C	73	114	144	3750	0.8573	23586	12938	23723	13449	73	113	151	3769	0.8627	25127	13417	25166	13862	74	114	145	3776	0.8819	26364	14170	26144	14731	74	113	148	3807	0.8678	26182	14256	25851	14434	-0.15397	-0.0991199	-0.116278	-0.108237	-0.0883977	-0.0377773
Plate07	272	AAA	7	12	8	NA	YJL182C	55	130	131	3138	0.913	17456	8428	18440	8641	55	129	128	3008	0.8752	17212	8243	18020	8553	56	130	128	3131	0.8777	17523	8421	18343	8571	56	129	135	3054	0.8467	17389	8362	18639	8639	-0.0329255	-0.0580041	-0.0314624	-0.0150198	-0.043347	-0.0378076
Plate14	164	AAA	14	7	20	NA	YPR015C	77	106	130	2998	0.8377	17924	9226	18949	9431	77	105	129	2955	0.8549	17338	8991	18295	9147	78	106	135	3123	0.8191	18672	9607	19803	9783	78	105	121	2847	0.8732	18058	9216	18534	9287	-0.0362733	-0.0496716	-0.017101	-0.0499305	-0.0545183	-0.0699875
Plate06	187	AAA	6	8	19	EST3	YIL009C-A	47	60	152	4045	0.863	27149	15315	27544	15368	47	59	169	4217	0.8299	24755	14145	25241	14612	48	60	153	4103	0.8779	26484	15124	26296	15058	48	59	180	4498	0.8446	24102	13541	24911	13872	-0.0345036	-0.0965301	-0.0763285	-0.0445813	-0.0287727	-0.0568039
Plate08	131	AAA	8	6	11	TVP38	YKR088C	11	76	212	4884	0.8125	26792	11337	27120	11468	11	75	205	4507	0.8244	25798	10791	26290	10977	12	76	221	5111	0.7874	27673	11572	27835	11710	12	75	212	4947	0.7781	27176	11509	27529	11583	-0.0557232	-0.0490141	-0.0407253	-0.0445334	-0.0368456	-0.0352139
Plate07	89	AAA	7	4	17	AVT1	YJR001W	39	112	132	3083	0.8435	21423	10879	22403	11083	39	111	130	2928	0.8878	20878	10749	22265	11171	40	112	128	3016	0.8263	21672	10952	22692	11007	40	111	138	3279	0.8408	22338	11407	23388	11736	-0.0219754	-0.0419471	0.0076538	-0.0219738	-0.0368123	-0.0632667
Plate09	57	AAA	9	3	9	IOC2	YLR095C	5	128	152	3066	0.8663	25625	9855	26552	9906	5	127	104	2129	0.7263	23926	9365	24774	9617	6	128	152	3226	0.7761	26145	9988	26722	10111	6	127	135	2871	0.7107	25028	9514	25434	9563	0.00226893	-0.0647726	-0.0155201	-0.0166516	-0.0242423	-0.0613889
Plate04	278	AAA	4	12	14	SHO1	YER118C	55	22	137	3325	0.874	16849	8851	17750	9238	55	21	156	4032	0.8842	18365	9861	18629	10325	56	22	159	4001	0.9011	18381	9795	19026	9767	56	21	159	4086	0.8961	18596	9719	18996	9876	-0.0378357	-0.124561	-0.0148802	-0.0329217	-0.0382723	-0.0676127
Plate06	203	AAA	6	9	11	NA	YHL039W	49	76	157	4031	0.8858	19373	10729	20382	11339	49	75	159	4126	0.8796	19624	10990	20558	11001	50	76	160	4069	0.8402	20358	11229	21041	11873	50	75	158	4045	0.8739	19734	10980	20838	11451	-0.0683117	-0.0136181	-0.0839272	-0.0485651	-0.040585	-0.0545782
Plate07	164	AAA	7	7	20	FYV10	YIL097W	45	106	150	3571	0.828	23112	12084	24156	12126	45	105	144	3432	0.7942	22950	11716	23711	12025	46	106	156	3681	0.8468	22930	12055	24004	12270	46	105	154	3617	0.8328	23353	12103	24331	11878	-0.00915219	-0.0294619	-0.0341581	0.0283036	-0.0469046	-0.0191787
Plate03	78	AAA	3	4	6	AHA1	YDR214W	7	134	159	3754	0.8875	27112	12354	28685	12781	7	133	160	3725	0.8699	27822	12950	29658	13451	8	134	152	3682	0.8687	27275	12374	28469	12828	8	133	162	3779	0.8321	27491	12920	28958	13477	-0.0397062	-0.0342314	-0.0573228	-0.0796126	-0.0503781	-0.0561035
Plate14	259	AAA	14	11	19	NA	YPR174C	85	108	145	3592	0.8329	28335	15599	28584	16169	85	107	138	3497	0.8438	30472	16847	30849	17638	86	108	148	3759	0.8147	31524	17998	31767	18518	86	107	158	3769	0.8531	28034	15752	27851	16189	-0.0903525	-0.0740247	-0.0852941	-0.134102	-0.0458829	-0.0291559
Plate07	52	AAA	7	3	4	SER33	YIL074C	37	138	157	3596	0.8092	15320	7047	15966	6992	37	137	152	3448	0.8429	14782	6848	15570	6972	38	138	162	3604	0.8652	15047	6935	15821	7028	38	137	160	3614	0.8613	14876	6898	15556	6863	-0.00550906	-0.0430989	-0.0268627	-0.0249287	-0.0259072	-0.0470091
Plate01	137	AAA	1	6	17	CSH1	YBR161W	11	16	184	4478	0.8118	15920	8305	16246	8611	11	15	184	4335	0.8808	15300	8015	15702	8282	12	16	178	4213	0.8793	15696	8279	16084	8603	12	15	182	4316	0.863	15362	8198	15603	8600	-0.0398903	-0.0393235	-0.0539821	-0.100017	-0.0197809	-0.0313313
Plate13	90	AAA	13	4	18	CWC27	YPL064C	71	62	185	4330	0.8262	13123	6647	13488	6819	71	61	165	3924	0.8348	14967	7397	15480	7674	72	62	144	3634	0.8672	14825	7343	15032	7631	72	61	178	4171	0.8278	13745	7011	14488	7425	-0.0821837	-0.0285605	-0.0662077	-0.086157	-0.0811548	-0.0231075
Plate06	201	AAA	6	9	9	ARN1	YHL040C	49	80	118	2852	0.8902	13495	7349	14498	7697	49	79	124	3057	0.8418	14604	7810	15523	8180	50	80	119	2993	0.8639	14369	7772	15053	8142	50	79	120	2941	0.8703	14267	7664	15401	7974	-0.0487279	-0.0290292	-0.0691247	-0.00593321	-0.0614134	-0.0262029
Plate02	70	AAA	2	3	22	NA	YBR224W	5	54	131	2974	0.8031	13871	7326	14333	7532	5	53	128	2783	0.8143	12980	7080	13419	7150	6	54	131	2984	0.8045	13864	7295	14763	7535	6	53	87	1985	0.8923	13768	6983	14477	7211	-0.0746025	-0.11146	-0.0282966	-0.00211626	-0.0453825	-0.10417
Plate10	206	AAA	10	9	14	YPT7	YML001W	81	22	76	1877	0.8643	6457	3019	6565	3141	81	21	54	1478	0.8727	NA	2756	NA	2921	82	22	64	1585	0.7472	5279	2514	5543	2633	82	21	108	2759	0.8198	8083	3688	8411	3942	-0.110376	NA	-0.131793	-0.0340067	-0.0582091	NA
Plate14	273	AAA	14	12	9	NA	YOR366W	87	128	164	4061	0.8283	27038	14908	27341	15071	87	127	163	4073	0.8524	27092	15090	27083	15690	88	128	162	3908	0.8218	28389	15243	29081	15715	88	127	162	4002	0.8943	27711	15346	27973	15439	-0.0733051	-0.139752	-0.0264431	-0.0670103	-0.0610459	-0.0737356
Plate08	151	AAA	8	7	7	HSL1	YKL101W	13	84	212	4883	0.7716	26651	11086	27003	11212	13	83	216	4867	0.8181	26034	10868	26398	11023	14	84	196	4333	0.8115	26036	10947	26430	11054	14	83	209	4963	0.8158	26622	11158	26872	11223	-0.0336276	-0.0478798	-0.0495738	-0.0426627	-0.0170155	-0.0295878
Plate11	63	AAA	11	3	15	NA	YNL028W	37	20	190	4573	0.7027	18012	7338	18037	7372	37	19	197	4528	0.7658	17630	7172	17708	7231	38	20	176	4021	0.827	17258	6982	17380	7004	38	19	186	4041	0.7574	16656	6844	16950	6902	-0.0309283	-0.0299511	-0.0116358	-0.027435	-0.0211208	-0.0194851
Plate02	191	AAA	2	8	23	PCL2	YDL127W	15	52	139	3160	0.8146	14039	7647	14341	7846	15	51	100	2230	0.7817	13453	6665	14444	7002	16	52	156	3585	0.8759	15087	8353	15221	8420	16	51	154	3473	0.8235	13782	7253	14123	7531	-0.126875	0.032494	-0.124704	-0.0978184	-0.0832695	0.0315698
Plate10	198	AAA	10	9	6	TRM12	YML005W	81	38	140	3600	0.8616	8916	4396	8949	4209	81	37	145	3438	0.8882	7422	3552	7775	3722	82	38	148	3620	0.813	7450	3500	7780	3548	82	37	142	3537	0.8834	7216	3319	7596	3375	-0.026572	-0.0779533	-0.0125996	0.0177321	-0.0811374	-0.0686864
Plate12	251	AAA	12	11	11	ZEO1	YOL109W	53	76	194	4422	0.8363	20535	8303	20760	8386	53	75	200	4482	0.84	20368	8215	20611	8337	54	76	184	4271	0.8382	20732	8440	21162	8570	54	75	198	4481	0.8145	20646	8326	20915	8490	-0.0304493	-0.0338636	-0.0292956	-0.0352085	-0.0298735	-0.0281254
Plate10	290	AAA	10	13	2	SRC1	YML034W	89	46	138	3404	0.8421	10352	5309	10687	5564	89	45	131	3317	0.8596	10169	4847	10698	5052	90	46	145	3645	0.8971	9807	4736	9817	4696	90	45	143	3636	0.856	9611	4657	9838	4647	-0.128145	0.00316516	-0.0310797	-0.0136873	-0.111827	-0.0146331
Plate09	70	AAA	9	3	22	RNP1	YLL046C	5	102	159	3252	0.7683	24491	9368	25138	9442	5	101	161	3430	0.6763	24931	9522	25479	9497	6	102	162	3430	0.741	25197	9614	25653	9740	6	101	137	2771	0.7961	22509	8612	22867	8727	-0.0176144	-0.00462438	-0.0280696	-0.0585736	-0.0258153	-0.0202774
Plate02	117	AAA	2	5	21	ATG22	YCL038C	9	56	121	2712	0.87	15407	8452	15943	8367	9	55	128	2851	0.8505	14730	7872	15829	7981	10	56	136	3106	0.8334	17227	9257	17800	9416	10	55	64	1481	0.9033	NA	6947	NA	7083	-0.0432443	0.00707184	-0.0240173	NA	-0.0708044	-0.0466251
Plate03	104	AAA	3	5	8	NOP6	YDL213C	9	130	161	3793	0.8441	27264	12803	28695	12880	9	129	149	3607	0.8527	28651	13241	30062	13523	10	130	161	3948	0.8769	27805	13067	29106	13164	10	129	163	3808	0.8569	28851	13551	30692	13774	-0.047394	-0.0153825	-0.0451406	0.002665	-0.0797456	-0.0278842
Plate04	146	AAA	4	7	2	DIG2	YDR480W	45	46	155	3826	0.8532	12029	6453	12226	6746	45	45	147	3679	0.8805	12432	6504	12654	6788	46	46	165	3944	0.8639	12856	6719	13276	7002	46	45	155	3859	0.8429	12737	6621	13045	6819	-0.138529	-0.0968734	-0.0705496	-0.0587046	-0.0766316	-0.039887
Plate07	300	AAA	7	13	12	GUT2	YIL155C	57	122	153	3717	0.8576	21420	10760	22301	11134	57	121	139	3360	0.8608	20116	10225	20835	10145	58	122	140	3337	0.8504	19582	9852	20558	10150	58	121	128	3217	0.8355	20937	10344	21690	10785	-0.0351769	-0.0317374	-0.054357	-0.0414446	-0.0230994	-0.0600165
Plate14	184	AAA	14	8	16	NA	YPL035C	79	114	128	3377	0.8972	31025	17958	31997	18305	79	113	146	3725	0.8307	30310	16928	30253	16842	80	114	134	3419	0.8539	30566	17000	30697	17595	80	113	151	3711	0.8442	27881	15244	27646	14759	-0.059151	-0.0488368	-0.0791568	-0.028795	-0.0816405	-0.0438527
Plate02	291	AAA	2	13	3	PHO87	YCR037C	25	92	167	3824	0.8434	23575	13307	23987	13845	25	91	180	4043	0.8247	21925	12770	22989	13118	26	92	168	4056	0.9027	21087	12005	21644	12374	26	91	170	3941	0.9055	21816	12481	22856	12649	-0.0580884	-0.0546812	-0.0734366	-0.0162691	-0.0120289	-0.0704033
Plate09	143	AAA	9	6	23	NA	YLR346C	11	100	170	3627	0.7732	26249	10175	26625	10151	11	99	156	3202	0.7648	24719	9448	25400	9592	12	100	181	3909	0.8126	26057	10064	26363	10209	12	99	178	3861	0.7167	26159	10096	26569	10207	-0.0264334	-0.0227815	-0.0493151	-0.0370888	-0.030388	-0.0229527
Plate12	304	AAA	12	13	16	TLG2	YOL018C	57	66	93	1678	0.6479	13671	5270	13935	5445	57	65	90	1591	0.7982	14074	5445	14387	5605	58	66	86	1577	0.675	14304	5495	14415	5741	58	65	77	1298	0.6595	NA	5141	NA	5300	-0.0544559	-0.0438839	-0.0730955	NA	-0.0350322	-0.0335055
Plate01	184	AAA	1	8	16	NA	YBR063C	15	18	149	3918	0.855	16396	8741	16482	8944	15	17	167	4017	0.8301	14871	7923	15224	8170	16	18	165	4080	0.8722	16173	8448	16418	8789	16	17	170	4062	0.8761	15368	7967	15666	8235	-0.0691533	-0.0682194	-0.0514542	-0.0351324	-0.0450865	-0.0586061
Plate13	102	AAA	13	5	6	MKK1	YOR231W	73	86	183	4277	0.8891	18753	9882	19312	10018	73	85	179	4309	0.8559	19526	10511	20144	10800	74	86	167	4024	0.8595	18571	9247	18863	9091	74	85	NA	NA	NA	NA	NA	NA	NA	-0.0492587	-0.08666	0.046211	NA	-0.0696341	-0.0916461
Plate01	276	AAA	1	12	12	MMS4	YBR098W	23	26	177	4195	0.8597	18401	9955	18966	10312	23	25	148	3544	0.9011	18277	9849	18833	10340	24	26	167	4059	0.884	18841	10114	19170	10449	24	25	185	4474	0.8651	18791	9956	19493	10233	-0.0463321	-0.0607948	-0.0477357	0.00612029	-0.0473422	-0.0430352
Plate13	175	AAA	13	8	7	NA	YPL206C	79	84	93	2187	0.788	13617	6809	14744	7211	79	83	114	2616	0.8522	13617	7023	14682	7388	80	84	113	210	0.6574	NA	119	NA	110	80	83	161	3910	0.8806	19067	9567	20013	9958	-0.0198466	-0.058947	NA	0.0134369	-0.0567063	-0.0983788
Plate06	87	AAA	6	4	15	CTF8	YHR191C	39	68	133	3395	0.8771	20391	11468	21223	11774	39	67	110	2643	0.8437	18448	10121	19380	10616	40	68	123	3129	0.8137	19923	11084	20649	11556	40	67	127	3268	0.8157	20568	11348	21504	11751	-0.059407	-0.0533296	-0.0748775	-0.0369121	-0.0561305	-0.0331487
Plate03	191	AAA	3	8	23	NA	YDR357C	15	100	197	4421	0.7994	39092	23681	39492	24634	15	99	152	3183	0.8393	36714	20117	38465	21445	16	100	199	4461	0.8218	38873	22787	39527	23917	16	99	196	4279	0.846	39776	24352	40682	25596	-0.130798	-0.0411722	-0.0996664	-0.112636	-0.0741819	-0.0229532
Plate10	132	AAA	10	6	12	NA	YMR075C-A	75	26	103	2902	0.8471	11012	5330	11607	5545	75	25	103	2913	0.8572	10703	5263	11168	5482	76	26	102	2840	0.8762	11354	5630	11879	5882	76	25	60	1580	0.8694	8460	4151	9026	4470	0.00375577	-0.040325	-0.0398001	-0.0942453	-0.0232601	-0.0492573
Plate10	175	AAA	10	8	7	SGS1	YMR190C	79	36	101	2505	0.8083	7826	3657	8102	3838	79	35	134	3384	0.8285	8935	4242	9124	4379	80	36	123	3033	0.828	6961	3389	6859	3403	80	35	127	3174	0.828	8027	3815	8411	3970	-0.0557418	-0.0499531	-0.150615	-0.0435217	-0.0279383	-0.0292043
Plate11	354	AAA	11	15	18	ASI3	YNL008C	61	14	161	3757	0.8149	18808	7726	19131	7833	61	13	174	3990	0.7842	18553	7566	18886	7691	62	14	174	3931	0.7525	19303	7859	19706	8008	62	13	167	3715	0.8137	18853	7625	19134	7674	-0.0336747	-0.0256516	-0.0234853	-0.00370245	-0.0330013	-0.0223989
Plate14	64	AAA	14	3	16	NA	YPL264C	69	114	148	3491	0.835	18187	9258	18502	9470	69	113	150	3439	0.8526	16276	8266	16904	8282	70	114	144	3335	0.8543	17552	8943	18275	8941	70	113	141	3182	0.8726	16505	8493	17435	8858	-0.078724	-0.038955	-0.0208687	-0.0811539	-0.037041	-0.0514883
Plate09	304	AAA	9	13	16	NA	YLR057W	25	114	204	4695	0.8265	28764	11205	29223	11239	25	113	216	4810	0.783	28654	11316	28984	11391	26	114	193	4308	0.7951	28798	11153	29133	11069	26	113	208	4585	0.8046	28728	11253	29081	11312	-0.0217696	-0.0525675	-0.00575476	-0.0380051	-0.0213335	-0.0406007
Plate14	209	AAA	14	9	17	TPO3	YPR156C	81	112	141	3442	0.8533	25946	13977	26828	14456	81	111	145	3531	0.8664	25795	14188	26762	14695	82	112	149	3554	0.82	26944	14716	27675	15183	82	111	143	3588	0.8261	26175	14084	26762	14014	-0.0506927	-0.0756083	-0.0631121	-0.0148567	-0.0414474	-0.0703209
Plate01	199	AAA	1	9	7	SSA3	YBL075C	17	36	179	4177	0.8577	19923	10732	20548	11177	17	35	183	4241	0.7508	19857	10787	20215	11341	18	36	172	4166	0.8498	20452	11052	20967	11648	18	35	185	4297	0.8789	19652	10651	20122	11112	-0.0320549	-0.0768073	-0.0567031	-0.0563662	-0.0286376	-0.0406523
Plate11	95	AAA	11	4	23	BOR1	YNL275W	39	4	166	3484	0.7919	14036	5603	14405	5754	39	3	187	4060	0.8047	14184	5588	14471	5693	40	4	206	4700	0.7707	15442	6366	15649	6454	40	3	170	3572	0.8307	14739	5986	14946	6045	-0.0160822	0.00542768	-0.0506747	-0.0282254	-0.0142823	0.00536741
Plate13	310	AAA	13	13	22	MPD1	YOR288C	89	54	150	3746	0.842	16600	8616	17249	9220	89	53	143	3552	0.8337	17022	8549	17586	9048	90	54	160	3892	0.8758	16520	8698	17313	8878	90	53	139	3496	0.8622	17011	8546	17325	8813	-0.109966	-0.0548368	-0.053191	-0.0421976	-0.0704628	-0.0214433
Plate14	61	AAA	14	3	13	DBF20	YPR111W	69	120	141	3172	0.8632	16731	8605	17626	8550	69	119	140	3273	0.8649	16649	8523	17334	8376	70	120	144	3305	0.8422	17929	8973	18717	8895	70	119	138	3159	0.8807	16857	8642	18005	8769	-0.0169204	-0.0152231	0.0229986	-0.0178826	-0.064395	-0.0588077
Plate12	44	AAA	12	2	20	ENB1	YOL158C	35	58	193	4043	0.8031	20603	8368	20753	8476	35	57	190	3886	0.8534	20436	8248	20716	8350	36	58	184	3965	0.8165	20403	8220	20632	8416	36	57	191	4087	0.821	20587	8310	20635	8500	-0.045144	-0.0280359	-0.0448234	-0.0577826	-0.0352416	-0.0283894
Plate04	227	AAA	4	10	11	NA	YFL032W	51	28	119	3422	0.8335	23068	12463	22628	12426	51	27	116	3133	0.8526	22528	11831	22696	12061	52	28	113	3197	0.9054	22469	11961	21908	12182	52	27	114	3132	0.899	22694	11888	23098	11989	-0.100773	-0.0542306	-0.120354	-0.0199195	-0.0708166	-0.0309333
Plate14	303	AAA	14	13	15	SGE1	YPR198W	89	116	167	4207	0.8687	30790	17089	30746	17499	89	115	130	3401	0.9056	29668	16574	30242	16868	90	116	149	3929	0.8557	31852	17977	31578	18002	90	115	158	4047	0.8839	29533	16794	29394	17301	-0.0697614	-0.0513545	-0.0605612	-0.129563	-0.0307168	-0.0510343
Plate08	211	AAA	8	9	19	NA	YKL107W	17	60	194	4214	0.7898	25863	10695	26265	10819	17	59	202	4422	0.7501	26009	10901	26197	11065	18	60	199	4393	0.8042	26235	10977	26555	11116	18	59	187	4290	0.7666	26425	11011	26574	11071	-0.0317958	-0.0649749	-0.0492653	-0.0428912	-0.0197715	-0.034996
Plate10	333	AAA	10	14	21	NA	YMR226C	91	8	143	3453	0.7777	9021	4444	9728	4796	91	7	131	3246	0.843	8971	4326	9440	4656	92	8	69	1756	0.8261	6678	3071	7029	3243	92	7	97	2318	0.8689	7033	3285	7393	3471	-0.0734388	-0.0799356	-0.0481405	-0.0617178	-0.0781741	-0.0498708
Plate09	201	AAA	9	9	9	PUT1	YLR142W	17	128	219	5131	0.7971	28789	11274	28978	11434	17	127	229	5293	0.8123	28819	11270	29213	11460	18	128	231	5425	0.7641	29162	11404	29436	11535	18	127	228	5290	0.7864	28621	11158	28909	11347	-0.0580089	-0.0487847	-0.0460758	-0.0512548	-0.0283766	-0.0263072
Plate07	307	AAA	7	13	19	PEP8	YJL053W	57	108	126	2839	0.7933	19513	9729	20923	9930	57	107	121	2758	0.8459	19695	9790	20908	10165	58	108	125	2813	0.8344	19419	9713	20674	9895	58	107	87	2098	0.8406	19418	9378	20461	9520	0.00177721	-0.0284299	-0.0135252	0.017411	-0.0460766	-0.0390118
Plate03	95	AAA	3	4	23	NA	YDR317W	7	100	182	3936	0.7818	36885	21259	38243	21588	7	99	198	4129	0.8445	36789	20588	38115	21239	8	100	172	3804	0.8132	37229	21014	38648	21798	8	99	199	4105	0.8574	37068	20998	38499	20942	-0.0587418	-0.048505	-0.0487868	-0.0154643	-0.0716103	-0.0432151
Plate10	103	AAA	10	5	7	HMG1	YML075C	73	36	178	4347	0.8891	8637	4144	9003	4197	73	35	169	4161	0.9018	9170	4400	9506	4466	74	36	161	3994	0.8681	9007	4342	9284	4326	74	35	163	3941	0.8608	8579	4155	8907	4311	-0.0134624	-0.0131929	-0.00679309	-0.0660094	-0.0488391	-0.0396885
Plate02	237	AAA	2	10	21	ARF2	YDL137W	19	56	132	3170	0.8693	13628	7256	14183	7384	19	55	142	3239	0.8834	14364	7451	15296	7555	20	56	147	3446	0.8455	14112	7461	14693	7502	20	55	138	3201	0.8597	13396	7083	13875	7169	-0.0654647	0.0244052	-0.0301114	-0.0618785	-0.0603384	-0.0131612
Plate06	200	AAA	6	9	8	AZR1	YGR224W	49	82	126	2974	0.8383	13824	7347	14783	7750	49	81	121	3089	0.8471	14398	7726	15210	7981	50	82	127	2988	0.8376	13726	7488	14659	7890	50	81	131	3261	0.8248	14734	7945	15366	8248	-0.0287164	-0.0260063	-0.0660414	-0.0557696	-0.0247173	-0.03271
Plate12	41	AAA	12	2	17	NA	YOR088W	35	64	142	2964	0.7698	18827	7651	18941	7788	35	63	145	2938	0.7257	18183	7141	18539	7177	36	64	116	2509	0.5707	17051	6618	17091	6654	36	63	106	2246	0.7853	16278	6483	16337	6513	-0.0728123	0.00543643	-0.0139068	-0.0528926	-0.0524336	-0.0113343
Plate13	293	AAA	13	13	5	NA	YPL025C	89	88	147	3456	0.84	16921	9125	17444	9585	89	87	133	3142	0.811	18680	9570	19281	10183	90	88	127	3294	0.8124	20466	10584	19985	10479	90	87	125	2916	0.8207	18577	9421	19675	10033	-0.145233	-0.0738569	-0.0578482	-0.0227932	-0.118859	-0.032077
Plate09	102	AAA	9	5	6	NA	YLR004C	9	134	215	4777	0.828	29270	11382	29519	11486	9	133	211	4714	0.7432	29094	11418	29376	11453	10	134	210	4824	0.8066	29386	11501	29737	11653	10	133	214	4811	0.8155	29183	11465	29504	11566	-0.0359887	-0.0394716	-0.0444528	-0.0462165	-0.0161598	-0.0296419
Plate12	141	AAA	12	6	21	NA	YOR114W	43	56	102	2224	0.7756	16443	6446	16318	6435	43	55	75	1242	0.5353	NA	5265	NA	5196	44	56	137	3116	0.7501	20097	7987	20150	8058	44	55	96	2057	0.7684	16557	6631	16613	6727	-0.0381858	NA	-0.0234743	-0.0717933	-0.0232939	NA
Plate08	195	AAA	8	9	3	OAC1	YKL120W	17	92	199	4272	0.8185	27664	11808	28142	12021	17	91	202	4241	0.8073	27380	11575	27988	11771	18	92	208	4575	0.7866	28327	12030	28784	12187	18	91	216	4647	0.8341	27913	11788	28468	12015	-0.0565434	-0.0385463	-0.037556	-0.0373437	-0.0362283	-0.0278882
Plate06	255	AAA	6	11	15	QCR10	YHR001W-A	53	68	126	3084	0.8425	16703	9040	17960	9205	53	67	125	3136	0.825	17101	9299	18074	9562	54	68	135	3282	0.8479	16946	9369	17797	9328	54	67	131	3238	0.8473	17149	9431	18017	9568	0.0286132	-0.0142803	-0.00341861	-0.0199049	-0.0260676	-0.0297445
Plate10	299	AAA	10	13	11	CLU1	YMR012W	89	28	62	1532	0.8815	6123	2974	6375	3186	89	27	137	3252	0.8687	7794	3805	8028	3809	90	28	140	3576	0.8666	9752	4492	10111	4647	90	27	130	3298	0.852	9057	4267	8910	4236	-0.174728	-0.0596812	0.0284991	-0.0418986	-0.118239	-0.0883544
Plate07	29	AAA	7	2	5	HXT8	YJL214W	35	136	168	3908	0.8321	19869	9872	20784	10206	35	135	171	3902	0.8222	20896	10267	21847	10512	36	136	156	3722	0.8106	19241	9565	20069	9900	36	135	169	3885	0.8038	19497	9787	20296	10122	-0.043207	0.00220498	-0.0629838	-0.072018	-0.0353888	-0.00370862
Plate10	200	AAA	10	9	8	GLO1	YML004C	81	34	171	4298	0.8733	10940	5264	11241	5336	81	33	179	4318	0.8521	9711	4793	10120	4844	82	34	177	4420	0.8484	10117	4912	10488	4981	82	33	167	4168	0.8867	9768	4830	10390	5104	0.00599252	-0.0259359	-0.00836972	-0.0556264	-0.0162218	-0.0693833
Plate14	227	AAA	14	10	11	NA	YOL153C	83	124	135	3275	0.8635	20193	10502	21387	10381	83	123	130	3177	0.8533	20319	10519	21372	10653	84	124	138	3326	0.8573	19800	10330	20934	10389	84	123	138	3312	0.8602	19142	9861	20493	9819	0.0232958	-0.0120918	-0.0110642	0.0310531	-0.0485315	-0.0411758
Plate13	224	AAA	13	10	8	HOS3	YPL116W	83	82	NA	NA	NA	NA	NA	NA	NA	83	81	128	2976	0.837	14332	7492	15256	7717	84	82	NA	NA	NA	NA	NA	NA	NA	84	81	169	4418	0.8631	25336	13085	26393	13201	NA	-0.0585197	NA	0.0529702	NA	-0.106909
Plate08	147	AAA	8	7	3	LAP4	YKL103C	13	92	221	4830	0.776	27930	11836	28287	11926	13	91	214	4540	0.8027	27596	11647	28063	11748	14	92	201	4536	0.7556	28201	12026	28506	12024	14	91	208	4431	0.8521	27586	11700	28010	11831	-0.0381509	-0.0317443	-0.0361443	-0.0437741	-0.0236383	-0.022932
Plate03	309	AAA	3	13	21	NA	YDR149C	25	104	84	2091	0.7658	31057	15779	32014	15818	25	103	113	2671	0.8126	30349	15358	31851	15701	26	104	88	2216	0.7675	34437	17903	36793	18989	26	103	99	2448	0.8485	31967	15857	33410	16254	-0.0669769	-0.0685106	-0.000102269	-0.017182	-0.0725215	-0.0851915
Plate08	291	AAA	8	13	3	RPS27A	YKL156W	25	92	171	3581	0.8014	28249	12146	29231	12190	25	91	203	4138	0.8804	28474	12113	29239	12183	26	92	170	3606	0.7986	28423	12207	29264	12321	26	91	182	3849	0.6939	28501	12031	29277	12085	-0.0129045	-0.0117348	-0.0245713	0.000584131	-0.0375165	-0.0211397
Plate10	334	AAA	10	14	22	REC114	YMR133W	91	6	185	4328	0.887	10293	5160	10550	5463	91	5	171	4171	0.8113	9938	4961	10249	5220	92	6	158	3775	0.8906	10957	5264	11082	5369	92	5	141	3526	0.82	10981	5298	10651	5212	-0.123418	-0.106891	-0.0242537	-0.0455245	-0.0816514	-0.0813016
Plate10	209	AAA	10	9	17	NA	YML107C	81	16	NA	NA	NA	NA	NA	NA	NA	81	15	153	3733	0.8502	7651	3828	7703	3788	82	16	68	1724	0.786	6078	2705	6407	2779	82	15	66	1781	0.8525	7574	3513	7739	3639	NA	-0.115922	0.0172603	-0.0547852	NA	-0.124724
Plate04	122	AAA	4	6	2	NA	YER079W	43	46	140	3602	0.8559	13035	6738	13047	6941	43	45	144	3848	0.8546	14043	7507	13717	7600	44	46	147	3855	0.8894	13669	7139	13410	7183	44	45	135	3375	0.8324	13694	7220	13804	7499	-0.0836424	-0.138965	-0.0920528	-0.110709	-0.0214436	-0.0675932
Plate08	172	AAA	8	8	4	TOS5	YKR011C	15	90	195	4132	0.8301	27346	11537	27786	11708	15	89	203	4298	0.8426	27513	11642	27931	11820	16	90	200	4282	0.7167	27531	11677	28075	11871	16	89	198	4129	0.8014	27218	11417	27769	11649	-0.0433396	-0.0471298	-0.0443546	-0.0378658	-0.0257606	-0.0272872
Plate12	327	AAA	12	14	15	IES4	YOR189W	59	68	161	3592	0.826	21786	8899	22292	8989	59	67	181	4001	0.8397	22305	9070	22697	9212	60	68	185	4274	0.8427	23027	9447	23280	9624	60	67	175	4073	0.8467	23252	9686	23690	9895	-0.0101861	-0.0134863	-0.0290512	-0.0360942	-0.0308499	-0.0193373
Plate02	226	AAA	2	10	10	NA	YDL034W	19	78	180	4270	0.8635	24058	14085	24897	14574	19	77	180	4267	0.8381	24082	14041	24871	14500	20	78	197	4792	0.8861	25527	14782	26546	15116	20	77	199	4695	0.8017	24809	14374	25616	14754	-0.0662359	-0.0612478	-0.0124684	-0.0372418	-0.0557811	-0.0500791
Plate10	327	AAA	10	14	15	TRI1	YMR233W	91	20	34	669	0.7298	NA	969	NA	983	91	19	180	4523	0.8295	9854	5064	10072	5063	92	20	155	3951	0.8553	9264	4506	9562	4669	92	19	106	NA	NA	745	210	723	189	NA	-0.0926974	-0.0638926	0.0177817	NA	-0.122262
Plate11	301	AAA	11	13	13	LEU4	YNL104C	57	24	163	3842	0.7971	18686	7654	19048	7770	57	23	186	4413	0.8256	19013	7726	19375	7851	58	24	174	4049	0.7808	18990	7721	19435	7871	58	23	182	4183	0.7425	18911	7683	19351	7810	-0.0281931	-0.0188557	-0.0181311	-0.0130199	-0.0288156	-0.0174276
Plate08	223	AAA	8	10	7	PSR1	YLL010C	19	84	242	5433	0.8039	28583	12164	29097	12166	19	83	160	NA	NA	7555	2137	6859	1731	20	84	221	4933	0.7906	27895	11698	28254	11759	20	83	229	5535	0.8209	28939	12388	29293	12442	-0.0178596	-0.0321616	-0.0220279	-0.0352807	-0.0201308	-0.0490186
Plate10	152	AAA	10	7	8	LEU3	YLR451W	77	34	131	3313	0.8369	7274	3444	7545	3455	77	33	126	3073	0.8751	6599	3092	7046	3261	78	34	133	3184	0.8712	6720	3142	7031	3177	78	33	127	3167	0.8314	7089	3275	7488	3365	-0.02415	-0.0518597	-0.0200614	-0.000338947	-0.0571262	-0.057808
Plate03	225	AAA	3	10	9	ATO3	YDR384C	19	128	122	2894	0.8585	24868	10765	26337	11098	19	127	122	3056	0.8801	25647	11285	27112	11554	20	128	136	3185	0.8361	25295	11058	26828	11244	20	127	127	3088	0.8753	25953	11511	28037	11828	-0.0398458	-0.0319096	-0.0210852	0.00288044	-0.0504677	-0.048726
Plate07	77	AAA	7	4	5	MET3	YJR010W	39	136	118	2743	0.8211	10529	4475	11243	4365	39	135	118	2826	0.8405	11038	4562	11580	4565	40	136	112	2586	0.865	10638	4558	11364	4591	40	135	119	2790	0.7995	10703	4495	11445	4432	0.00850092	0.000831878	-0.0370666	0.0185947	-0.0510619	0.000436749
Plate07	124	AAA	7	6	4	NA	YJL142C	43	138	170	4061	0.8459	21018	10462	21774	10653	43	137	166	3913	0.8813	20436	10373	21118	10804	44	138	170	4109	0.8559	20735	10330	21357	10593	44	137	160	3894	0.8358	20686	10458	21376	10538	-0.0198191	-0.087613	-0.044641	-0.0367229	-0.0181469	-0.0527326
Plate09	95	AAA	9	4	23	MID2	YLR332W	7	100	161	3348	0.7277	24732	9449	25286	9527	7	99	173	3567	0.7199	24847	9660	25288	9739	8	100	164	3420	0.7881	25141	9673	25760	9696	8	99	170	3529	0.7639	25174	9501	25396	9508	-0.0205888	-0.050026	-0.0155686	-0.011212	-0.0222845	-0.0448245
Plate06	274	AAA	6	12	10	SPS100	YHR139C	55	78	170	4326	0.8807	20744	11442	21527	11896	55	77	168	4185	0.856	19639	11008	20325	11363	56	78	161	4141	0.8913	20428	11125	20831	11685	56	77	171	4297	0.8248	20017	11240	20598	11741	-0.0522322	-0.0754456	-0.0769915	-0.10052	-0.0272622	-0.0557004
Plate07	27	AAA	7	2	3	NA	YJL215C	35	140	129	2874	0.823	16713	7860	17853	8174	35	139	118	2743	0.7447	16386	7673	17307	7856	36	140	128	2919	0.8779	15542	7300	16152	7444	36	139	120	2759	0.8374	16414	7773	17334	7795	-0.0168784	-0.0184325	-0.0645895	-0.00616926	-0.0246891	-0.0258882
Plate03	200	AAA	3	9	8	NA	YDL241W	17	130	129	3202	0.8947	24787	10568	26002	10651	17	129	121	2958	0.8675	25148	10951	26701	11297	18	130	144	3443	0.8663	25087	10701	26898	11089	18	129	135	3127	0.7817	24240	10649	25851	11069	-0.0175907	-0.0347301	-0.00122892	-0.0702882	-0.035497	-0.0498968
Plate10	204	AAA	10	9	12	NA	YML002W	81	26	171	4416	0.7546	10912	5369	11127	5497	81	25	163	4028	0.8017	9699	4752	10177	4951	82	26	173	4258	0.838	9174	4636	9460	4777	82	25	143	3946	0.8518	11926	5619	12248	5653	-0.0496669	-0.0466459	-0.111159	0.0607167	-0.0470809	-0.0595325
Plate02	205	AAA	2	9	13	NA	YCR006C	17	72	157	3711	0.8434	16460	8904	17487	9106	17	71	156	3841	0.8348	17139	9316	17536	9369	18	72	159	3769	0.8471	17161	9452	17891	9483	18	71	159	3887	0.8693	16737	9104	17192	9101	-0.00813123	-0.0410083	-0.0252694	-0.0342265	-0.0370717	-0.0343568
Plate09	103	AAA	9	5	7	NA	YLR112W	9	132	186	4275	0.7713	28162	10896	28362	11017	9	131	193	4321	0.8151	27681	10888	28092	11079	10	132	195	4405	0.7693	28106	10883	28463	11075	10	131	199	4391	0.77	27730	10771	28145	10928	-0.0403252	-0.0625599	-0.0420213	-0.041062	-0.0155184	-0.0408173
Plate04	270	AAA	4	12	6	NA	YER121W	55	38	141	3453	0.8146	12725	6650	13295	6757	55	37	151	3760	0.8826	13447	7187	14223	7404	56	38	145	3565	0.8291	12765	6683	13149	6671	56	37	145	3687	0.8549	12819	6624	13227	6738	-0.0179062	-0.0487708	-0.0159267	-0.0214305	-0.0376876	-0.0684123
Plate04	316	AAA	4	14	4	NA	YER140W	59	42	161	3827	0.8767	12495	6544	12931	6680	59	41	153	3823	0.874	13137	6824	13405	7122	60	42	203	4982	0.8389	13038	6999	13467	7193	60	41	164	3920	0.8397	12688	6561	13276	6909	-0.0423601	-0.0804934	-0.0878099	-0.0515726	-0.0412862	-0.0282346
Plate04	75	AAA	4	4	3	ECM32	YER176W	39	44	137	3103	0.8509	9460	4869	10010	4994	39	43	128	2958	0.8684	9569	5018	10174	5273	40	44	137	3002	0.8342	9109	4756	9726	4992	40	43	135	3038	0.8331	9160	4759	9486	4907	-0.00627868	-0.0591358	-0.0481379	-0.0607651	-0.0261176	-0.0520687
Plate10	229	AAA	10	10	13	CLN1	YMR199W	83	24	152	3800	0.8482	8548	4044	9049	4328	83	23	170	4199	0.8605	8793	4129	9293	4252	84	24	157	3996	0.8703	8821	4336	9162	4389	84	23	168	4164	0.8824	9090	4434	9282	4614	-0.0469247	0.0178949	-0.0466147	-0.0937685	-0.0312216	-0.0166812
Plate09	44	AAA	9	2	20	HMX1	YLR205C	3	106	159	3178	0.7437	25476	9722	25996	9731	3	105	189	4035	0.7099	27737	10781	28214	10842	4	106	174	3804	0.7166	26662	10260	27156	10367	4	105	183	3942	0.7749	26702	10444	26993	10491	-0.00635422	-0.0266037	-0.0245262	-0.0498258	-0.0149284	-0.0243183
Plate02	306	AAA	2	13	18	PHO89	YBR296C	25	62	179	4789	0.8737	25686	14909	25392	14840	25	61	194	4666	0.8459	20812	11900	21070	12503	26	62	179	4583	0.8497	20608	11552	20971	12137	26	61	185	4427	0.8632	19817	11108	20161	11508	-0.0587085	-0.129389	-0.0979511	-0.0904336	-0.0289736	-0.0577515
Plate11	43	AAA	11	2	19	SIP3	YNL257C	35	12	116	2375	0.8268	14083	5645	14276	5785	35	11	141	3003	0.7059	14589	5859	14912	5922	36	12	161	3527	0.8261	14784	6010	14732	6084	36	11	162	3474	0.8108	13919	5538	14046	5677	-0.0370855	-0.00327634	-0.0587971	-0.0360984	-0.0193368	-0.0165863
Plate01	314	AAA	1	14	2	GRS1	YBR121C	27	46	162	3495	0.8601	15676	8095	16149	8075	27	45	98	2174	0.8911	14027	7395	14641	7794	28	46	93	2044	0.8222	15662	8000	16246	8235	28	45	117	2628	0.876	14972	8056	15545	8502	0.0379347	-0.0641793	0.0205462	-0.0902081	-0.00813012	-0.0524935
Plate08	108	AAA	8	5	12	ENT3	YJR125C	9	74	217	4966	0.7638	26345	11079	26538	11140	9	73	208	4575	0.8285	26166	10904	26480	10908	10	74	206	4741	0.7569	26299	10897	26447	10902	10	73	213	4895	0.8453	26935	11282	26900	11323	-0.0530689	-0.0293927	-0.0306694	-0.052411	-0.0348758	-0.0256396
Plate04	259	AAA	4	11	19	NA	YEL068C	53	12	129	3221	0.808	15849	8227	16269	8164	53	11	168	3985	0.8074	17514	9195	18495	9408	54	12	137	3240	0.8167	15602	8396	15743	8303	54	11	149	3614	0.8255	16967	8875	16877	8687	0.00965969	-0.00335907	-0.0624975	-0.0246323	-0.0226435	-0.0365514
Plate06	252	AAA	6	11	12	PHO81	YGR233C	53	74	156	3869	0.8492	18483	10079	19234	10334	53	73	152	3850	0.8696	19129	10546	19922	10651	54	74	154	3921	0.8875	18621	10306	19609	10726	54	73	163	4136	0.854	18786	10386	19831	10751	-0.0275802	-0.0163425	-0.0498667	-0.0361298	-0.0245461	-0.0357599
Plate04	251	AAA	4	11	11	FMP52	YER004W	53	28	171	4312	0.8939	16703	8795	17395	8928	53	27	172	4344	0.8868	17142	9046	17803	9383	54	28	169	4144	0.8632	16236	8490	17044	8535	54	27	176	4299	0.8781	16638	8788	17404	9050	-0.0190753	-0.0555462	0.0148512	-0.0375625	-0.0418473	-0.0443882
Plate06	88	AAA	6	4	16	PTC7	YHR076W	39	66	138	3356	0.832	22361	12320	23553	13014	39	65	148	3726	0.8571	24209	13682	25308	14350	40	66	137	3482	0.8352	23336	13067	24199	13816	40	65	150	3754	0.8355	24186	13716	25232	14439	-0.0408058	-0.0675673	-0.0826316	-0.0806284	-0.0173393	-0.0439745
Plate09	175	AAA	9	8	7	ARC18	YLR370C	15	132	169	3687	0.7882	29286	11363	30278	11642	15	131	171	3767	0.8354	29365	11468	30283	11653	16	132	160	3426	0.8217	29248	11482	30163	11741	16	131	184	4042	0.8251	30000	11824	30936	12039	-0.0157258	-0.0167624	-0.0330643	-0.0287927	-0.0130491	-0.0215078
Plate10	32	AAA	10	2	8	YET2	YMR040W	67	34	128	NA	NA	660	228	643	205	67	33	150	3621	0.851	7873	3437	8133	3436	68	34	174	4246	0.8778	8039	3715	8267	3640	68	33	147	3488	0.774	7083	3136	7150	3119	-0.280485	0.0989052	0.046542	0.0305718	-0.273929	0.0659075
Plate07	127	AAA	7	6	7	NA	YJR030C	43	132	148	3594	0.8691	19001	9342	19807	9719	43	131	161	3934	0.872	21076	10522	21847	10825	44	132	152	3640	0.8405	19144	9503	19950	9670	44	131	150	3676	0.7919	19665	9682	20627	10220	-0.0616698	-0.0341614	-0.0435702	-0.0573769	-0.0374718	-0.020939
Plate11	298	AAA	11	13	10	FET4	YMR319C	57	30	170	3859	0.7889	21200	8545	21590	8716	57	29	161	3797	0.7694	21042	8611	21617	8832	58	30	172	3879	0.7919	21497	8717	21982	8951	58	29	172	3837	0.8147	20914	8467	21438	8730	-0.0187361	-0.0365635	-0.0329479	-0.0310405	-0.00994993	-0.0318497
Plate02	213	AAA	2	9	21	NA	YCL075W	17	56	144	3317	0.8634	15624	8334	16192	8256	17	55	150	3570	0.8741	15522	8299	16036	8262	18	56	145	3338	0.8869	15864	8483	16543	8428	18	55	137	3173	0.8259	14319	7711	14922	7650	-0.00132597	-0.0175654	0.00559313	-0.0310555	-0.0303513	-0.0349737
Plate02	327	AAA	2	14	15	DLD2	YDL178W	27	68	180	4310	0.8798	21882	12375	22156	12658	27	67	172	4109	0.87	20362	11668	20963	11788	28	68	176	4137	0.9162	21164	11965	21808	12023	28	67	170	4115	0.8473	21349	11940	21866	12376	-0.0662661	-0.0603999	-0.0238779	-0.0575585	-0.0317333	-0.0656364
Plate14	110	AAA	14	5	14	HAL1	YPR005C	73	118	141	3178	0.8723	18278	9382	19527	9430	73	117	128	2986	0.8551	18070	9252	19434	9531	74	118	129	3076	0.8929	18256	9317	19153	9213	74	117	124	3009	0.8734	19338	9978	20339	9993	0.0103492	-0.0112948	0.0115944	-0.00408968	-0.0475508	-0.0459916
Plate11	129	AAA	11	6	9	CLA4	YNL298W	43	32	165	3652	0.8232	17299	7081	17706	7243	43	31	215	4785	0.8445	18493	7506	18832	7628	44	32	181	4176	0.7401	18141	7370	18586	7560	44	31	201	4525	0.8086	18234	7400	18646	7547	-0.0324895	-0.0178644	-0.0238579	-0.016727	-0.0288753	-0.0155818
Plate10	130	AAA	10	6	10	RCO1	YMR075W	75	30	127	3480	0.8415	15509	8005	15848	8204	75	29	122	3492	0.7722	14711	7425	15221	7560	76	30	116	3125	0.8829	13724	6864	14303	7104	76	29	87	2522	0.8147	14348	7343	15045	7666	-0.0414132	0.00590599	-0.00667156	-0.0307285	-0.0574206	-0.0351968
Plate01	64	AAA	1	3	16	ERP2	YAL007C	5	18	182	4452	0.8819	17794	9493	17583	9535	5	17	186	4491	0.8236	17534	9224	17666	9397	6	18	186	4592	0.8611	18690	9987	18711	10115	6	17	190	4554	0.8481	17763	9546	17669	9834	-0.0565969	-0.0296643	-0.0410462	-0.0908561	-0.0335404	-0.0166708
Plate06	267	AAA	6	12	3	PIG2	YIL045W	55	92	117	2949	0.9076	14656	7614	15277	7942	55	91	145	3651	0.8613	16661	9068	17131	9490	56	92	142	3486	0.8752	15388	8420	15754	8797	56	91	154	3737	0.8622	15133	8395	15699	8861	-0.0126328	-0.0846571	-0.106697	-0.121951	0.0141836	-0.0341266
Plate14	113	AAA	14	5	17	NA	YPR125W	73	112	142	3199	0.8753	19841	10589	20949	11079	73	111	144	3336	0.8126	20748	10669	22051	11013	74	112	150	3401	0.8396	20394	10709	21614	11025	74	111	117	2768	0.8631	20394	10270	21874	10579	-0.095222	-0.00724365	-0.0399574	0.0333857	-0.0866486	-0.0282027
Plate11	222	AAA	11	10	6	PEX17	YNL214W	51	38	153	3306	0.7737	20136	8215	20509	8359	51	37	140	3107	0.7762	19494	7951	19626	8100	52	38	148	3227	0.8162	20128	8185	20533	8340	52	37	127	2766	0.7551	18789	7586	19183	7701	-0.0295041	-0.0459554	-0.0245048	-0.00512174	-0.0248958	-0.0233578
Plate01	224	AAA	1	10	8	TEC1	YBR083W	19	34	133	3021	0.8292	14426	7584	15090	7946	19	33	126	2916	0.8484	14627	7630	15436	8095	20	34	139	3188	0.7851	15073	7765	15785	8057	20	33	132	3103	0.8334	14826	7756	15537	8043	-0.044097	-0.0345564	0.00604666	-0.0158432	-0.0446523	-0.0319967
Plate06	276	AAA	6	12	12	NA	YHR138C	55	74	149	3673	0.8947	16938	9240	17791	9377	55	73	154	3757	0.8882	17614	9611	18456	9765	56	74	153	3709	0.8732	16708	9190	17707	9264	56	73	160	3961	0.879	17947	9785	18737	9723	-0.0111443	-0.0117317	-0.00158301	0.0169769	-0.0353263	-0.0310347
Plate01	112	AAA	1	5	16	FUN26	YAL022C	9	18	125	3016	0.8455	14047	7197	14567	7497	9	17	130	2968	0.8102	13445	6997	13941	7369	10	18	125	2927	0.8682	13778	7084	14093	7459	10	17	142	3198	0.8497	13241	6910	13899	7153	-0.0193065	-0.0631895	-0.0630471	-0.0274851	-0.0130946	-0.0406416
Plate11	45	AAA	11	2	21	GIS2	YNL255C	35	8	169	3572	0.7845	15270	6211	15581	6319	35	7	137	2819	0.8028	13539	5144	13883	5163	36	8	161	3377	0.8336	14697	6031	14938	6167	36	7	97	1913	0.6626	12606	5076	12574	5219	-0.0275911	0.0742622	-0.0566834	-0.0937185	-0.0285962	0.0455799
Plate10	62	AAA	10	3	14	RPN13	YLR421C	69	22	142	3415	0.8566	7248	3377	7431	3520	69	21	168	3952	0.8425	6987	3341	7210	3369	70	22	68	1621	0.8614	5257	2335	5557	2444	70	21	165	4068	0.8309	7282	3441	7599	3387	-0.0726696	-0.060221	-0.0269771	0.0135676	-0.0357299	-0.0768027
Plate04	26	AAA	4	2	2	RPL34A	YER056C-A	35	46	159	3962	0.8136	22675	12027	23979	12191	35	45	147	3898	0.8597	21914	11576	22580	11770	36	46	150	3970	0.7772	21294	11227	21881	11504	36	45	155	3997	0.8023	20881	11004	21782	11389	0.0116208	-0.0272507	-0.0411744	-0.0336274	-0.0449512	-0.0399988
Plate13	297	AAA	13	13	9	MET12	YPL023C	89	80	127	3100	0.78	15905	8107	16750	8463	89	79	123	2964	0.7875	15620	7893	16543	8315	90	80	121	2931	0.8536	15710	7963	16470	8237	90	79	123	2941	0.8774	15960	8029	16718	8345	-0.0392888	-0.0345786	-0.0286549	-0.0232761	-0.0536492	-0.0452069
Plate13	38	AAA	13	2	14	KTR6	YPL053C	67	70	144	3658	0.8507	13222	6401	12412	6161	67	69	127	2967	0.8087	12122	5958	12648	6160	68	70	194	4669	0.8396	14761	7473	15104	7491	68	69	140	3380	0.8275	12045	5883	12362	5971	-0.0747943	-0.0454185	-0.0339322	-0.0391836	-0.0188241	-0.0562358
Plate06	281	AAA	6	12	17	NOT3	YIL038C	55	64	135	3197	0.8027	16290	9071	16803	9091	55	63	120	2960	0.9005	16468	9024	17860	9220	56	64	134	3145	0.8125	16671	9131	17710	9458	56	63	80	1974	0.8006	15036	7820	16047	8216	-0.0547031	0.0179499	-0.0298738	0.0151128	-0.068446	-0.0449254
Plate14	116	AAA	14	5	20	PDH1	YPR002W	73	106	155	3945	0.8296	25310	13551	24845	13857	73	105	154	3763	0.8212	23643	12683	23861	12691	74	106	142	3727	0.8436	26651	14361	27041	14423	74	105	161	3875	0.8341	23828	12628	24067	13175	-0.119138	-0.0692964	-0.035064	-0.104388	-0.039545	-0.0581645
Plate14	330	AAA	14	14	18	NA	YDR290W	91	110	106	2303	0.8768	12652	6340	13050	6292	91	109	121	2464	0.851	14278	7162	14877	7285	92	110	99	2227	0.8589	14186	6842	14572	6794	92	109	120	2599	0.8791	15054	7543	15611	7624	-0.0712347	-0.0647177	-0.00333014	-0.0511489	-0.071173	-0.0545603
Plate06	100	AAA	6	5	4	XKS1	YGR194C	41	90	117	2836	0.8947	12047	6359	12639	6557	41	89	97	2463	0.8506	12293	6404	12721	6596	42	90	117	2786	0.8604	12026	6451	12621	6686	42	89	125	2940	0.8721	12409	6574	13281	6912	-0.0372921	-0.0355451	-0.0660407	-0.0340222	-0.0342562	-0.0132783
Plate04	269	AAA	4	12	5	ALR2	YFL050C	55	40	156	3871	0.8275	13795	7267	13968	7755	55	39	158	4030	0.7957	14677	7748	14927	7912	56	40	153	3794	0.8905	14418	7511	14796	7961	56	39	153	3777	0.8004	14002	7299	14358	7780	-0.141017	-0.0721025	-0.0937882	-0.1052	-0.047053	-0.048571
Plate01	188	AAA	1	8	20	TRM7	YBR061C	15	10	159	4022	0.7989	14587	7572	14495	7642	15	9	175	4181	0.875	13645	7062	13751	7259	16	10	167	4148	0.9141	14064	7295	14245	7507	16	9	174	4091	0.8497	13515	6988	13717	7248	-0.0528433	-0.0638023	-0.0553224	-0.0655346	-0.0256781	-0.031015
Plate03	44	AAA	3	2	20	SAS4	YDR181C	3	106	174	4091	0.8603	34024	18234	34941	19194	3	105	179	4020	0.8334	35331	19017	36324	19828	4	106	178	4211	0.8516	34536	18393	35541	18807	4	105	184	4224	0.813	34693	18609	35761	18800	-0.107067	-0.0682827	-0.0544977	-0.0426642	-0.0600593	-0.0350479
Plate08	176	AAA	8	8	8	FOX2	YKR009C	15	82	224	4842	0.8487	26731	11318	27058	11470	15	81	202	4538	0.8489	26815	11161	27204	11269	16	82	217	4888	0.8338	27519	11560	28005	11651	16	81	213	4774	0.8363	26919	11270	27303	11437	-0.0596125	-0.0282873	-0.0244824	-0.0414767	-0.0384131	-0.0156407
Plate06	308	AAA	6	13	20	YAP1802	YGR241C	57	58	142	3600	0.875	22248	12445	23062	12633	57	57	167	4049	0.8879	23360	13164	24378	13801	58	58	140	3489	0.8787	21884	12086	23045	12370	58	57	154	3705	0.8262	22729	12678	23318	12613	-0.0315076	-0.0700417	-0.00358327	-0.0127036	-0.0389339	-0.0438296
Plate07	139	AAA	7	6	19	TES1	YJR019C	43	108	167	3890	0.8316	27400	14931	28499	15507	43	107	182	4331	0.854	27921	15126	28745	15740	44	108	168	4098	0.8736	27717	15143	28404	15610	44	107	164	3917	0.8414	28030	15280	28806	15843	-0.0393986	-0.0435211	-0.0530701	-0.0480348	-0.0375407	-0.0232337
Plate08	122	AAA	8	6	2	SRY1	YKL218C	11	94	206	4393	0.78	28335	11979	28698	12115	11	93	221	4767	0.7873	28016	11893	28294	11968	12	94	207	4430	0.7679	28485	12191	28736	12229	12	93	211	4489	0.769	28218	12006	28506	12045	-0.0348821	-0.0422347	-0.0446158	-0.0383635	-0.0152275	-0.0246659
Plate07	109	AAA	7	5	13	DAL4	YIR028W	41	120	143	3591	0.8447	20831	10495	21603	10440	41	119	124	3117	0.8876	20916	10525	21755	10825	42	120	135	3309	0.8698	21380	10715	22040	11222	42	119	126	3211	0.8777	21288	10781	22176	11165	-0.00775648	-0.0411076	-0.0643137	-0.0478763	-0.0365959	-0.0336276
Plate14	311	AAA	14	13	23	OPT2	YPR194C	89	100	143	3427	0.7233	28453	15319	29575	16070	89	99	161	3804	0.8297	27445	15151	28384	15395	90	100	160	3591	0.8429	27217	15302	28958	15732	90	99	151	3586	0.8088	29546	15989	30741	16630	-0.0271656	-0.0397858	-0.0346903	-0.00681769	-0.0157607	-0.05853
Plate04	275	AAA	4	12	11	RGD2	YFL047W	55	28	150	3657	0.8805	13003	6871	13441	6828	55	27	139	3334	0.8477	12814	6661	13356	6721	56	28	142	3580	0.9008	13051	6848	13379	6821	56	27	132	3258	0.8507	12525	6509	13052	6554	-0.0167257	-0.0036132	-0.0220488	-0.00168359	-0.0529713	-0.0299028
Plate07	297	AAA	7	13	9	BNA3	YJL060W	57	128	135	3173	0.8348	18933	9244	20066	9511	57	127	132	3207	0.8259	19315	9532	20653	9802	58	128	138	3264	0.8369	18951	9218	19908	9269	58	127	134	3230	0.8722	19330	9531	20147	9643	-0.0134494	-0.00347515	0.00558748	-0.0239488	-0.0298573	-0.0365803
Plate03	26	AAA	3	2	2	NA	YDR199W	3	142	180	4108	0.8307	28451	12672	28519	12249	3	141	173	3952	0.816	27024	12359	27399	12545	4	142	168	3889	0.8553	26168	11717	26875	11903	4	141	177	4014	0.8523	25529	11491	26486	11770	-0.00427736	-0.102371	-0.0801059	-0.094035	0.00768366	-0.0566178
Plate01	140	AAA	1	6	20	FMP23	YBR047W	11	10	147	3444	0.7802	12087	6112	12617	6391	11	9	146	3321	0.8561	12299	6215	12951	6494	12	10	144	3244	0.8693	12212	6263	12926	6601	12	9	123	2810	0.852	11821	6134	12328	6415	-0.0229238	-0.00458689	-0.0296862	-0.0634764	-0.0157448	-0.0124155
Plate02	329	AAA	2	14	17	NA	YDL177C	27	64	178	4254	0.8427	18908	10575	19305	11067	27	63	149	3819	0.8284	19199	10766	19150	11079	28	64	164	3756	0.8507	17359	9459	17904	9745	28	63	168	4118	0.8196	19296	10551	19472	11098	-0.107621	-0.121744	-0.0598214	-0.0977114	-0.050114	-0.050163
Plate04	334	AAA	4	14	22	NA	YER128W	59	6	149	3406	0.8076	14463	7606	14890	7552	59	5	151	3391	0.8363	15574	8149	16062	8226	60	6	139	3172	0.8409	15591	8123	16028	8054	60	5	157	3514	0.8015	15702	8299	15955	8265	-0.00964348	-0.0198552	0.00700884	-0.036369	-0.0434682	-0.034466
Plate12	69	AAA	12	3	21	NA	YOL046C	37	56	158	3350	0.8374	18937	7606	18990	7702	37	55	131	2812	0.794	17935	7154	18045	7143	38	56	147	3141	0.8327	18346	7219	18639	7324	38	55	145	3081	0.79	18016	7112	18295	7238	-0.0538166	-0.0291128	-0.0139607	-0.0262649	-0.0355245	-0.0346768
Plate14	207	AAA	14	9	15	NA	YPR157W	81	116	132	3063	0.8492	19860	10494	20634	10495	81	115	119	2844	0.8652	21017	10687	22604	10951	82	116	127	3033	0.8746	21295	10942	22348	11163	82	115	126	2914	0.8252	18400	9559	19565	9918	-0.0470193	0.0389499	-0.00419239	-0.0541466	-0.0729886	-0.0106903
Plate14	43	AAA	14	2	19	NA	YGR255C	67	108	124	2949	0.8286	17266	8541	17907	8785	67	107	128	2902	0.8829	16516	8293	17313	8498	68	108	118	2804	0.8385	17915	9335	18359	9418	68	107	128	2907	0.8352	16275	8301	16919	8532	-0.0287639	-0.03646	-0.083355	-0.0774052	-0.00632156	-0.0336802
Plate03	98	AAA	3	5	2	RRI1	YDL216C	9	142	131	3188	0.8562	23774	9797	24490	10138	9	141	124	3064	0.8515	23292	9756	24305	9930	10	142	127	3008	0.8479	22970	9498	23886	10010	10	141	122	3004	0.884	23391	9797	24546	10102	-0.0699576	-0.0604835	-0.100274	-0.0619586	-0.0236072	-0.0548105
Plate01	177	AAA	1	8	9	NA	YBR178W	15	32	182	4298	0.8468	18729	9970	19221	10385	15	31	195	4582	0.8381	18582	9993	18820	10423	16	32	187	4392	0.8547	19009	10260	19585	10740	16	31	204	4673	0.8262	19014	10092	19672	10444	-0.0353606	-0.0726531	-0.0519462	-0.00740876	-0.0224992	-0.0376359
Plate01	80	AAA	1	4	8	NA	YBR042C	7	34	108	2423	0.8524	12718	6517	13531	6909	7	33	121	2766	0.8726	12922	6717	13664	7173	8	34	137	3080	0.8711	13275	6874	14010	7239	8	33	150	3370	0.8208	12978	6573	13799	6787	-0.0214974	-0.0573594	-0.0315124	0.0326576	-0.0269932	-0.0444963
Plate11	100	AAA	11	5	4	NA	YMR269W	41	42	133	2763	0.7769	17050	6937	17382	7121	41	41	156	3254	0.7599	17400	7053	17761	7207	42	42	144	3033	0.7627	17847	7229	18067	7360	42	41	154	3136	0.8006	17283	7049	17758	7243	-0.0350899	-0.0208469	-0.0261802	-0.0282279	-0.0208299	-0.0147295
Plate02	127	AAA	2	6	7	SNA4	YDL123W	11	84	149	3456	0.8176	23507	13627	24258	13456	11	83	137	3192	0.8546	22308	12717	23413	12736	12	84	145	3402	0.8517	23977	13523	24928	13575	12	83	148	3460	0.8978	23182	13491	24258	13994	-0.00311197	0.0127813	0.028399	-0.054333	-0.0480679	-0.0378992
Plate11	194	AAA	11	9	2	PRP12	YMR302C	49	46	182	4035	0.7904	23990	9586	24337	9711	49	45	173	3814	0.7797	23049	9354	23487	9438	50	46	193	4485	0.7408	24787	9972	25196	10058	50	45	181	4032	0.7972	23768	9534	24186	9693	-0.0134041	-0.0197155	-0.0187572	-0.0191956	-0.00846555	-0.0272217
Plate12	116	AAA	12	5	20	PPG1	YNR032W	41	58	160	3532	0.819	20887	8368	20838	8353	41	57	163	3490	0.8465	18743	7442	18824	7508	42	58	162	3561	0.8141	20517	8288	20317	8370	42	57	176	3761	0.8363	19488	7863	19574	8035	-0.0193727	-0.0326064	-0.0614378	-0.0643669	-0.0141054	-0.0215115
Plate14	357	AAA	14	15	21	IME2	YJL106W	93	104	146	3364	0.8279	24618	13412	25594	13604	93	103	134	3070	0.8138	22296	11825	23009	11842	94	104	145	3188	0.8406	24791	13166	26407	13371	94	103	138	3142	0.8439	24938	12991	26528	13496	-0.0479803	-0.0360963	0.0242064	0.0195199	-0.0692903	-0.0556646
Plate07	111	AAA	7	5	15	DAL1	YIR027C	41	116	136	3187	0.822	21232	10712	22708	10913	41	115	136	3167	0.8525	21407	10753	23070	11293	42	116	133	3027	0.8688	20450	10338	21797	10621	42	115	136	3324	0.8529	21871	11032	23188	11240	0.0194395	0.00309251	-0.0143526	0.017321	-0.0316953	-0.0232569
Plate04	79	AAA	4	4	7	GRX4	YER174C	39	36	118	2822	0.8238	9848	5156	10497	5198	39	35	128	3051	0.8257	10741	5557	11404	5710	40	36	130	3039	0.8519	10229	5280	11005	5484	40	35	128	3042	0.8615	10826	5682	11515	5884	0.00711401	-0.00408714	0.000824795	-0.0324357	-0.0484809	-0.0281971
Plate14	231	AAA	14	10	15	AGA1	YNR044W	83	116	144	3292	0.8861	20980	10906	22379	11177	83	115	124	3015	0.8872	20722	10522	21943	10655	84	116	132	3139	0.8303	20012	10434	20537	10466	84	115	133	3316	0.8697	19735	10314	20860	10396	-0.00367629	0.0288242	-0.0506687	-0.0174699	-0.0407629	-0.0114092
Plate07	165	AAA	7	7	21	NA	YIR035C	45	104	175	4051	0.8192	28269	15618	29420	15943	45	103	172	4009	0.835	28391	15764	29332	16214	46	104	171	4017	0.8448	28639	15553	29601	16118	46	103	165	3998	0.8506	29389	16052	30376	16234	-0.0208498	-0.0465289	-0.0241091	0.00990091	-0.0433488	-0.0480388
Plate13	185	AAA	13	8	17	CSM4	YPL200W	79	64	161	4271	0.8421	13149	6601	13770	6912	79	63	152	3806	0.8091	15512	7935	16488	8223	80	64	79	2093	0.8637	17011	8661	17050	8742	80	63	143	3500	0.8947	14799	7185	15221	7534	-0.0684098	-0.0246818	-0.05582	-0.0297543	-0.0687597	-0.0630216
Plate10	28	AAA	10	2	4	ARG80	YMR042W	67	42	116	2741	0.7831	7022	3043	7215	3087	67	41	158	3817	0.8043	8805	4237	9172	4483	68	42	131	2994	0.886	6455	3090	6667	3076	68	41	151	3441	0.8513	6469	3095	6588	3003	0.0583816	-0.0734214	-0.0584952	-0.0444884	0.058425	-0.0498683
Plate13	71	AAA	13	3	23	SPS4	YOR313C	69	52	104	2453	0.8729	10843	5512	11374	5797	69	51	168	3810	0.8298	12471	6525	13199	6925	70	52	115	2692	0.8666	14323	6484	14516	6699	70	51	134	3139	0.8163	12890	6132	13509	6294	-0.128933	-0.136318	0.0550279	0.0276248	-0.124198	-0.134682
Plate06	214	AAA	6	9	22	NA	YGR210C	49	54	138	3303	0.8533	21104	11673	22482	11765	49	53	150	3484	0.7902	21377	11812	22179	11834	50	54	152	3477	0.834	21576	11947	22640	11813	50	53	154	3546	0.8401	21364	11989	22316	12075	0.0283851	-0.000110372	0.0333085	-0.0186633	-0.0292013	-0.026359
Plate06	299	AAA	6	13	11	ECM12	YHR021W-A	57	76	165	4089	0.9029	18856	10456	19971	10530	57	75	166	4273	0.856	19361	10686	20158	10867	58	76	162	4100	0.8712	19450	10604	20379	10922	58	75	168	4287	0.893	20187	11147	21189	11067	0.00312124	-0.0263104	-0.0168516	0.0236524	-0.0454424	-0.0359509
Plate09	310	AAA	9	13	22	OSW2	YLR054C	25	102	182	3796	0.8131	26969	10389	27526	10485	25	101	160	3417	0.7301	26547	10482	27075	10467	26	102	182	3916	0.7605	27714	10732	28135	10919	26	101	145	3052	0.6908	25149	9447	25861	9567	-0.0190658	-0.0420775	-0.0404881	0.0084613	-0.0170478	-0.053269
Plate14	348	AAA	14	15	12	NA	YPR084W	93	122	157	3645	0.8233	21405	11367	22553	11463	93	121	158	3669	0.8737	22061	11534	23388	11532	94	122	145	3259	0.8555	22181	11285	23086	11206	94	121	128	2907	0.8297	21080	11099	22013	11224	-0.024817	0.0244261	0.0416826	-0.0350246	-0.0656513	-0.0386247
Plate01	95	AAA	1	4	23	NA	YBR139W	7	4	184	4287	0.8887	13579	7099	13892	7348	7	3	188	4218	0.8628	13534	6892	13907	7216	8	4	NA	4230	0.8309	NA	NA	NA	NA	8	3	NA	4329	0.8425	NA	NA	NA	NA	-0.0647093	-0.0384898	NA	NA	-0.045523	-0.00989817
Plate07	68	AAA	7	3	20	NA	YIL064W	37	106	124	2863	0.874	23124	12198	24485	12457	37	105	116	2703	0.8753	24180	12211	25693	12525	38	106	116	2742	0.8294	23119	11998	24675	12633	38	105	128	2960	0.8344	23864	12509	24937	12767	-0.0201368	0.0525928	-0.024722	-0.0203296	-0.0579384	0.0131094
Plate10	173	AAA	10	8	5	SPG5	YMR191W	79	40	139	3446	0.9086	7865	3687	7895	3655	79	39	149	3569	0.8382	8013	3733	8375	3812	80	40	141	3329	0.8439	7335	3493	7631	3646	80	39	157	3573	0.8412	7308	3452	7420	3458	-0.0299298	0.0044628	-0.0790269	-0.0510555	-0.031545	-0.0201535
Plate12	71	AAA	12	3	23	PSK2	YOL045W	37	52	177	3763	0.7652	19931	7955	20020	8007	37	51	175	3815	0.7887	20777	8333	20801	8393	38	52	177	3866	0.8537	20642	8354	20679	8410	38	51	173	3886	0.7937	20814	8458	20736	8461	-0.0249513	-0.0284839	-0.040333	-0.0440709	-0.01809	-0.0166366
Plate09	232	AAA	9	10	16	SEC22	YLR268W	19	114	211	4827	0.746	28552	11095	28871	11105	19	113	202	4492	0.7366	28120	10859	28478	10769	20	114	204	4729	0.6708	28148	10913	28531	10885	20	113	209	4574	0.7774	28022	10988	28312	10913	-0.0239582	-0.00319847	-0.014888	-0.030153	-0.0191664	-0.0131721
Plate09	206	AAA	9	9	14	RAD5	YLR032W	17	118	135	NA	NA	7304	1710	6706	1323	17	117	NA	NA	NA	NA	NA	NA	NA	18	118	155	NA	NA	6722	1384	6456	1161	18	117	NA	NA	NA	NA	NA	NA	NA	0.00203131	NA	0.0348243	NA	-0.0365556	NA
Plate08	53	AAA	8	3	5	STB6	YKL072W	5	88	190	4023	0.7924	26672	11219	27082	11303	5	87	200	4373	0.7369	27227	11367	27796	11507	6	88	207	4526	0.8305	26834	11211	27127	11362	6	87	196	4281	0.7613	26699	11165	27132	11269	-0.0393513	-0.0206137	-0.0433844	-0.0325276	-0.0308615	-0.0140968
Plate04	103	AAA	4	5	7	NA	YEL028W	41	36	138	3477	0.8513	13413	6925	13975	7174	41	35	148	3462	0.8609	13050	6952	13843	7321	42	36	131	3492	0.862	14232	7362	14763	7528	42	35	138	3296	0.856	13546	7119	14223	7376	-0.0297755	-0.0724784	-0.0176858	-0.0433945	-0.0189881	-0.0644802
Plate01	186	AAA	1	8	18	NA	YBR062C	15	14	137	3258	0.8637	12683	6543	13230	6865	15	13	159	3617	0.8657	12716	6463	13274	6655	16	14	152	3561	0.8077	13546	6930	14014	7339	16	13	128	3044	0.8737	13192	6855	13612	7107	-0.0472574	-7.13e-05	-0.0496694	-0.0506639	-0.0366297	-0.0157939
Plate06	31	AAA	6	2	7	OYE2	YHR179W	35	84	142	3757	0.7572	20739	11207	21339	11784	35	83	163	4094	0.8186	18062	10130	18763	10292	36	84	150	3918	0.8122	19491	10733	20122	10911	36	83	157	4051	0.8702	19933	11007	20293	11038	-0.0523755	-0.0593248	-0.0345763	-0.0377911	0.00115582	-0.0661171
Plate04	263	AAA	4	11	23	HPA3	YEL066W	53	4	176	4144	0.7991	19148	10223	19772	10499	53	3	187	4425	0.823	20293	10494	20787	10821	54	4	177	4172	0.7696	18423	9806	18668	9925	54	3	184	4294	0.8603	20018	10427	20422	10595	-0.0607551	-0.0299602	-0.065513	-0.0261144	-0.058462	-0.0114098
Plate06	282	AAA	6	12	18	YCK1	YHR135C	55	62	170	4206	0.8562	23432	13242	24490	12998	55	61	173	4112	0.8222	23025	12889	24207	13240	56	62	177	4417	0.8257	24186	13438	25406	13635	56	61	174	4135	0.8857	23591	13130	24745	13175	0.0196091	-0.0233475	0.0088175	0.016528	-0.0474225	-0.0361578
Plate09	84	AAA	9	4	12	NA	YLR225C	7	122	197	4439	0.7614	27802	10894	28102	10988	7	121	195	4195	0.7385	26304	9984	26986	10121	8	122	196	4400	0.7828	26794	10391	27296	10559	8	121	211	4779	0.8088	27738	10753	28018	10857	-0.0508264	-0.00174838	-0.0414401	-0.0391419	-0.0349058	-0.00158332
Plate07	76	AAA	7	4	4	URA2	YJL130C	39	138	158	3751	0.8997	23254	12067	23865	12031	39	137	153	3662	0.8389	23604	12274	24169	12061	40	138	162	3790	0.8979	23572	12143	24017	12073	40	137	152	3677	0.8265	24209	12655	24937	12328	-0.0194067	-0.00161853	-0.0132499	0.0229012	-0.0351972	-0.0324875
Plate10	242	AAA	10	11	2	OST6	YML019W	85	46	162	3773	0.8583	8166	3837	8676	3927	85	45	114	2716	0.8387	7516	3590	7793	3693	86	46	159	3766	0.8242	8742	4072	8916	4170	86	45	134	3147	0.8677	7781	3738	8099	3816	0.0189213	-0.0638734	-0.0197516	-0.048583	-0.0289368	-0.0640941
Plate01	115	AAA	1	5	19	URA7	YBL039C	9	12	126	2859	0.8558	12661	6477	13146	6771	9	11	132	3222	0.8954	13231	6781	13645	7082	10	12	143	3407	0.8226	12851	6639	13405	6946	10	11	138	3274	0.8458	13189	6771	13691	7155	-0.0383171	-0.0421829	-0.0430505	-0.0509336	-0.0253173	-0.0218161
Plate09	334	AAA	9	14	22	NA	YLR296W	27	102	182	3779	0.7893	27262	10503	27771	10690	27	101	163	3473	0.7623	26954	10336	27507	10300	28	102	199	4252	0.7724	28362	11195	28766	11195	28	101	176	3859	0.7154	27693	10700	28008	10754	-0.0316919	0.0039404	-0.0404879	-0.0267689	-0.0152892	-0.0109763
Plate14	166	AAA	14	7	22	NA	YPR014C	77	102	136	3431	0.8551	23785	12917	24118	13266	77	101	133	3465	0.8353	28706	15704	29332	16735	78	102	78	2032	0.8465	24744	13110	24941	13327	78	101	114	2935	0.8377	24493	12848	24723	12808	-0.109978	-0.0914795	-0.0626268	-0.0250262	-0.0731643	-0.0339321
Plate08	137	AAA	8	6	17	NUP133	YKR082W	11	64	149	3184	0.7984	23712	9565	24527	9659	11	63	138	2955	0.8059	23072	9339	23711	9450	12	64	138	3075	0.8144	23846	9637	24167	9665	12	63	149	3294	0.7693	24408	10001	25063	10105	0.00745182	-0.0171136	-0.0166366	-0.0173978	-0.0155087	-0.0282304
Plate13	283	AAA	13	12	19	NA	YPL229W	87	60	122	2955	0.8716	18697	9086	19623	9583	87	59	127	3131	0.8769	15906	7956	16750	8138	88	60	146	3601	0.847	16647	8452	17620	8652	88	59	62	1682	0.8776	16267	8852	16019	9018	0.0353421	0.0135557	0.00861854	-0.193546	0.0396914	-0.0281299
Plate11	190	AAA	11	8	22	NA	YNL191W	47	6	169	3755	0.7233	14643	5885	14873	5969	47	5	165	3497	0.7187	14091	5646	14308	5767	48	6	162	3493	0.8265	14203	5669	14535	5777	48	5	170	3763	0.8151	14969	6041	15238	6139	-0.0181217	-0.029426	-0.00791448	-0.0205779	-0.0170825	-0.018712
Plate14	160	AAA	14	7	16	RLF2	YPR018W	77	114	125	2959	0.8678	16927	8662	17579	8756	77	113	124	2833	0.8541	17720	8875	18962	9152	78	114	126	2850	0.8502	16985	8681	18151	8945	78	113	135	3089	0.8296	18182	9204	19150	9545	-0.0529266	0.004984	-0.0319973	-0.0360331	-0.0556793	-0.0191085
Plate03	76	AAA	3	4	4	NA	YDR215C	7	138	149	3558	0.8369	25963	11507	27217	12167	7	137	149	3550	0.9055	26251	11713	27428	12225	8	138	139	3489	0.8579	26574	11722	27554	12122	8	137	137	3332	0.8977	26422	11771	27409	12240	-0.0812199	-0.0724766	-0.055046	-0.0750543	-0.0487315	-0.0488713
Plate04	155	AAA	4	7	11	GDA1	YEL042W	45	28	174	4285	0.8433	17471	9239	18324	9683	45	27	180	4373	0.8606	17955	9380	18806	9617	46	28	172	4171	0.8451	17756	9359	18534	9729	46	27	176	4179	0.8531	17778	9273	18639	9665	-0.0578366	-0.0100268	-0.0478262	-0.0301784	-0.0469584	-0.0288968
Plate14	179	AAA	14	8	11	NA	YJL103C	79	124	177	4285	0.8472	28285	15335	28715	15707	79	123	167	4023	0.8571	26874	14833	27337	15005	80	124	170	4202	0.8446	28603	15430	28776	15890	80	123	161	4006	0.8665	27278	14939	27265	15175	-0.046362	-0.0679584	-0.0575344	-0.086542	-0.026507	-0.0640624
Plate06	310	AAA	6	13	22	PEX21	YGR239C	57	54	129	2974	0.8545	18708	10505	19534	10852	57	53	123	2892	0.8113	20964	11425	22043	11857	58	54	130	3136	0.8377	20701	11310	21885	11556	58	53	130	2969	0.7556	21251	11848	22584	11999	-0.0717508	-0.0120483	0.0126183	0.00802084	-0.0637389	-0.00939143
Plate06	61	AAA	6	3	13	NA	YGR290W	37	72	155	3854	0.8128	20564	11367	21327	11609	37	71	159	3990	0.8085	20729	11503	21679	11782	38	72	164	4144	0.8476	21003	11621	21878	12063	38	71	167	4290	0.8295	21610	11974	22474	12378	-0.0325684	-0.0283508	-0.0471307	-0.0422443	-0.0312021	-0.0357203
Plate07	292	AAA	7	13	4	POT1	YIL160C	57	138	163	3824	0.8535	17216	8292	18020	8361	57	137	159	3877	0.8696	17561	8324	18301	8304	58	138	159	3755	0.8482	17746	8605	18253	8507	58	137	146	3680	0.8899	18655	8932	19207	9072	-0.0297524	0.004152	-0.03021	-0.0265736	-0.0449753	-0.0178748
Plate08	148	AAA	8	7	4	NA	YJR146W	13	90	187	3943	0.8275	26909	11302	27308	11472	13	89	201	4456	0.784	27523	11521	27756	11590	14	90	209	4598	0.7995	27396	11602	27744	11681	14	89	205	4531	0.8205	27321	11433	27783	11579	-0.0451049	-0.0321241	-0.0428202	-0.0293477	-0.0258745	-0.0135297
Plate06	195	AAA	6	9	3	ECM34	YHL043W	49	92	133	3109	0.8414	11627	6098	12428	6280	49	91	137	3284	0.8733	12576	6562	13176	6737	50	92	124	2940	0.8151	11378	6022	11877	6090	50	91	127	2938	0.8866	11674	6150	12213	6231	-0.00409728	-0.0110137	-0.0314623	-0.0200309	-0.0307682	-0.0122264
Plate12	42	AAA	12	2	18	NA	YOL159C	35	62	187	3968	0.7471	20587	8255	20679	8313	35	61	175	3720	0.785	20647	8387	20589	8467	36	62	180	3903	0.8287	19750	7773	19882	7929	36	61	185	4062	0.7551	20200	8220	20480	8411	-0.0249068	-0.056096	-0.0224561	-0.0555367	-0.0181856	-0.0349922
Plate07	74	AAA	7	4	2	NA	YJL131C	39	142	162	3948	0.8761	29542	15865	29941	15409	39	141	148	3394	0.8141	21166	10840	21652	10689	40	142	137	3184	0.8946	22160	11450	22032	10659	40	141	154	3795	0.8565	27340	14751	27390	14871	0.0501045	-0.0332487	-0.00112878	-0.053509	0.00865742	-0.0517883
Plate01	197	AAA	1	9	5	ATG8	YBL078C	17	40	103	2406	0.8217	14501	7712	15404	8105	17	39	113	2629	0.9001	15153	7849	16014	8339	18	40	102	2458	0.8386	15626	8119	16441	8577	18	39	108	2467	0.8833	15335	7919	16401	8449	-0.0394056	-0.0184739	-0.0162593	0.000364069	-0.0597548	-0.0172876
Plate01	305	AAA	1	13	17	NA	YBL100C	25	16	197	4749	0.8465	17595	9539	17722	9940	25	15	209	5092	0.8854	18146	9418	18577	9694	26	16	194	4596	0.8105	17290	9150	17447	9557	26	15	190	4557	0.7807	16954	8961	17192	9292	-0.100756	0.00538053	-0.071619	-0.0561575	-0.0572379	0.00707102
Plate02	196	AAA	2	9	4	NA	YBR280C	17	90	132	3165	0.8804	32544	19521	33252	20563	17	89	159	3755	0.9099	31840	19181	32501	19255	18	90	165	3792	0.8259	30113	18294	30925	18695	18	89	148	3494	0.8791	30684	18670	31264	19486	-0.0540794	-0.00569977	-0.0465972	-0.0829112	-0.014105	-0.0254149
Plate03	179	AAA	3	8	11	YPR1	YDR368W	15	124	131	3200	0.8594	26601	11859	28250	12290	15	123	131	3173	0.8541	27040	12263	28816	12702	16	124	129	3118	0.9051	26746	11912	28494	12311	16	123	126	3122	0.892	26941	12167	28509	12461	-0.0249879	-0.0247865	-0.0113179	-0.0234551	-0.0390636	-0.0469563
Plate06	292	AAA	6	13	4	GND2	YGR256W	57	90	150	3561	0.8921	15109	8205	15760	8562	57	89	152	3761	0.8629	16027	8652	16470	9018	58	90	151	3750	0.8387	15531	8359	16178	8732	58	89	153	3752	0.8639	15589	8393	16266	8694	-0.0688678	-0.0737976	-0.0564126	-0.0422239	-0.0430283	-0.0275758
Plate13	359	AAA	13	15	23	SMA1	YPL027W	93	52	133	3189	0.7918	11951	6074	11843	6116	93	51	129	2925	0.8776	12504	6148	12852	6285	94	52	145	3350	0.8245	13600	6812	14079	7104	94	51	130	3166	0.81	17457	8338	17552	8301	-0.137703	-0.0475433	-0.0709254	0.0586211	-0.104044	-0.0505737
Plate03	70	AAA	3	3	22	TFP1	YDL185W	5	102	182	4133	0.7736	36277	20182	37465	20621	5	101	148	3285	0.8524	34756	18926	36082	20322	6	102	160	3743	0.8306	37443	21306	38682	22459	6	101	106	2537	0.8477	34501	17796	36388	18662	-0.0506448	-0.105905	-0.077267	-0.00281889	-0.0484085	-0.0601754
Plate12	355	AAA	12	15	19	GAS4	YOL132W	61	60	174	3663	0.8152	21746	8789	22100	9027	61	59	188	4064	0.7998	22241	9115	22691	9282	62	60	181	3868	0.7683	22662	9214	23193	9397	62	59	170	3621	0.798	22592	9296	23233	9431	-0.0293581	-0.0236912	-0.00455125	-0.00641498	-0.017177	-0.0303686
Plate08	196	AAA	8	9	4	CAP1	YKL007W	17	90	210	4426	0.8614	27164	11373	27592	11569	17	89	210	4464	0.7595	27398	11560	27892	11765	18	90	211	4586	0.7803	27781	11807	28222	11966	18	89	205	4435	0.8497	27813	11651	28395	11819	-0.0393165	-0.0434214	-0.0461251	-0.020518	-0.0185192	-0.0251857
Plate07	302	AAA	7	13	14	IMP2'	YIL154C	57	118	82	1984	0.8125	16014	7408	16677	7758	57	117	118	2727	0.8316	17183	8281	17998	8453	58	118	114	2720	0.8786	16998	8063	17875	8252	58	117	115	2721	0.8374	17610	8364	18550	8810	-0.0636132	-0.0453749	-0.0266783	-0.0472597	-0.0181459	-0.0463804
Plate08	52	AAA	8	3	4	NA	YJR116W	5	90	196	4208	0.7601	26609	11094	27072	11266	5	89	188	3890	0.8333	25484	10555	26026	10774	6	90	217	4766	0.804	27128	11406	27519	11580	6	89	199	4224	0.7529	26318	10867	26881	10994	-0.0357268	-0.0409443	-0.0447845	-0.0155625	-0.0204806	-0.0266964
Plate04	170	AAA	4	8	2	IES5	YER092W	47	46	130	2909	0.8658	6321	3260	6503	3225	47	45	124	2730	0.921	6188	3033	6462	3025	48	46	125	2642	0.7882	6037	3103	6348	3147	48	45	131	2943	0.8467	6391	3211	6606	3179	-0.035603	0.0434111	-0.0379826	0.0078737	-0.0612025	0.00674433
Plate01	275	AAA	1	12	11	FTH1	YBR207W	23	28	154	3557	0.8539	15063	7831	16064	8206	23	27	148	3318	0.8843	14329	7450	15317	7908	24	28	132	3132	0.9061	15208	7945	15957	8379	24	27	153	3583	0.8996	14885	7718	15660	8080	0.00806487	-0.0147468	-0.0304131	-0.00998673	-0.0231656	-0.0304158
Plate11	50	AAA	11	3	2	GFD1	YMR255W	37	46	194	4194	0.8035	22529	9100	22960	9249	37	45	181	3963	0.8278	22076	8947	22372	9075	38	46	189	4127	0.7898	22531	9038	22916	9091	38	45	194	4168	0.8241	22013	8907	22451	9097	-0.0209691	-0.0288138	0.00208066	-0.0274974	-0.0179341	-0.0211178
Plate06	157	AAA	6	7	13	NA	YHL026C	45	72	123	3061	0.8956	16183	8768	17041	9072	45	71	122	3062	0.8711	16651	9004	17573	9280	46	72	121	2997	0.8283	16186	8616	17074	9056	46	71	126	3123	0.7941	16237	8978	16975	9088	-0.0306043	-0.0154183	-0.0252553	-0.0388847	-0.0314146	-0.0252415
Plate13	30	AAA	13	2	6	SUR1	YPL057C	67	86	77	1974	0.82	18072	9142	18398	9346	67	85	146	3450	0.8139	19054	9632	20264	10106	68	86	76	1727	0.8691	11908	5979	12926	6196	68	85	NA	NA	NA	NA	NA	NA	NA	-0.0294668	0.0125023	-0.0195724	NA	-0.0206534	-0.0105286
Plate03	131	AAA	3	6	11	NA	YDR348C	11	124	133	3242	0.8122	27758	12790	29451	13355	11	123	131	3196	0.8529	27987	12664	29883	13226	12	124	118	2942	0.8444	27081	12306	28629	12903	12	123	126	3085	0.8934	27663	12700	29695	13240	-0.0392579	-0.00244736	-0.0534793	-0.0150248	-0.0465634	-0.0210057
Plate09	307	AAA	9	13	19	IDP2	YLR174W	25	108	213	4698	0.6598	28684	11157	28925	11169	25	107	199	4305	0.7899	27881	11003	28214	11028	26	108	208	4744	0.7892	28950	11128	29275	11135	26	107	199	4415	0.7667	28598	11073	28971	10931	-0.0289141	-0.0496756	-0.006415	0.00277248	-0.0197267	-0.0441055
Plate04	249	AAA	4	11	9	YND1	YER005W	53	32	152	3989	0.8389	14211	7425	14864	7543	53	31	157	3906	0.8675	14484	7611	15165	7926	54	32	151	3800	0.8096	13288	6932	13573	6953	54	31	169	4194	0.8837	14367	7471	15072	7670	-0.0105136	-0.0514221	-0.028147	-0.0138379	-0.0345798	-0.0422981
Plate12	282	AAA	12	12	18	NA	YOR059C	55	62	176	3849	0.8051	21195	8583	21540	8703	55	61	177	3874	0.7394	21293	8499	21457	8684	56	62	175	3858	0.8345	21032	8536	21430	8686	56	61	178	3886	0.8364	21204	8630	21409	8775	-0.0218891	-0.0250683	-0.0273459	-0.0423046	-0.0254268	-0.00513651
Plate06	244	AAA	6	11	4	NA	YGR237C	53	90	109	2708	0.8266	12929	6881	13583	7189	53	89	103	2717	0.8746	14932	7912	15713	8243	54	90	119	2839	0.8162	12920	6935	13674	7212	54	89	101	2549	0.907	12762	6744	13403	6991	-0.0537174	-0.0211772	-0.0479781	-0.0356967	-0.0355418	-0.0106115
Plate13	190	AAA	13	8	22	PNG1	YPL096W	79	54	157	3798	0.8745	14828	7156	15197	7353	79	53	84	2073	0.8924	13757	6071	14295	6354	80	54	85	2014	0.8017	11244	5145	12043	5400	80	53	65	NA	NA	878	210	853	182	0.000539443	0.102275	0.0543546	-0.280316	0.00726696	0.113479
Plate11	260	AAA	11	11	20	NA	YMR304C-A	53	10	154	3440	0.766	15343	6111	15514	6197	53	9	143	3141	0.7156	14558	5781	14718	5854	54	10	156	3345	0.6987	15028	6103	15414	6212	54	9	160	3503	0.7924	14252	5788	14490	5885	-0.00682345	-0.00714358	-0.0198437	-0.0380047	0.00109263	-0.00142428
Plate01	81	AAA	1	4	9	ARA1	YBR149W	7	32	149	3377	0.8724	13219	6854	14183	7148	7	31	76	1745	0.8652	11743	5720	12226	6004	8	32	134	3181	0.8369	13377	7064	14019	7594	8	31	147	3519	0.8327	13742	7128	14343	7400	0.00441112	0.0134555	-0.09541	-0.0253774	-0.0379001	0.0316007
Plate13	117	AAA	13	5	21	MRS2	YOR334W	73	56	77	2048	0.8903	11740	5428	11568	5409	73	55	76	1958	0.8348	16565	8836	17002	8892	74	56	144	3756	0.864	18514	9507	18678	9518	74	55	102	2774	0.8579	17338	8798	17496	8803	-0.0103609	-0.0831287	-0.031009	-0.0255969	0.0192478	-0.107828
Plate14	188	AAA	14	8	20	NA	YOR240W	79	106	127	3012	0.8416	18700	9598	19268	9704	79	105	134	3120	0.8738	19271	9959	20286	10033	80	106	136	3213	0.8288	20948	10735	21951	10867	80	105	143	3299	0.8534	20624	10647	21033	10530	-0.048641	-0.0134673	0.00331163	-0.0216251	-0.0437365	-0.0480583
Plate12	293	AAA	12	13	5	MDH2	YOL126C	57	88	181	3971	0.8167	22262	9073	22663	9284	57	87	196	4191	0.8194	22208	9109	22824	9297	58	88	162	3616	0.793	21901	8962	22473	9166	58	87	166	3561	0.8451	21589	8638	22000	8838	-0.0259375	-0.016453	-0.0227678	-0.00884823	-0.0227935	-0.0318233
Plate04	346	AAA	4	15	10	NA	YDR537C	61	30	162	3905	0.863	13816	7302	14356	7307	61	29	164	4142	0.9003	14692	8074	15312	7942	62	30	154	3737	0.8494	14095	7263	14760	7335	62	29	103	2618	0.8674	13568	6741	14409	7103	-0.0164092	-0.0401417	0.0188674	0.0291777	-0.0517086	-0.106052
Plate04	229	AAA	4	10	13	HAC1	YFL031W	51	24	87	2638	0.8793	20176	10698	20458	10938	51	23	99	2826	0.8467	20414	10550	20154	10825	52	24	90	2587	0.8728	16339	8603	16389	8867	52	23	107	2956	0.8727	19597	10306	19786	10523	-0.0686326	-0.0759336	-0.0967646	-0.0629485	-0.0473664	-0.0103761
Plate02	103	AAA	2	5	7	NA	YCL047C	9	84	165	4073	0.8296	35050	21672	35573	21913	9	83	155	3711	0.8993	32183	19299	32564	19954	10	84	161	3946	0.8714	36238	22929	36994	23675	10	83	153	3750	0.9115	33927	20707	34068	20682	-0.0279756	-0.0486682	-0.0643613	-0.0227884	-0.034108	-0.0166296
Plate09	257	AAA	9	11	17	NA	YLR152C	21	112	185	4120	0.7562	26980	10387	27439	10436	21	111	199	4365	0.7297	27055	10467	27405	10408	22	112	191	4366	0.6814	27165	10468	27512	10492	22	111	196	4372	0.7569	27215	10547	27629	10488	-0.0175847	-0.0158543	-0.0207484	-0.0137282	-0.0161626	-0.0223029
Plate07	315	AAA	7	14	3	YUH1	YJR099W	59	140	163	3797	0.845	18055	8868	18590	9359	59	139	155	3821	0.8521	19292	9660	19689	9666	60	140	165	3958	0.838	20113	9784	20776	10186	60	139	158	3795	0.8999	19829	9551	20490	9755	-0.118913	-0.0646961	-0.0414058	-0.0105367	-0.0536749	-0.0554439
Plate03	212	AAA	3	9	20	GYP7	YDL234C	17	106	188	4484	0.842	38156	21233	38969	22037	17	105	171	3937	0.7868	37961	22381	38928	23905	18	106	177	4150	0.842	38269	22115	39147	23222	18	105	179	4359	0.8124	37597	21219	38203	21752	-0.0442729	-0.127963	-0.0883649	-0.0683604	-0.00756558	-0.0712215
Plate14	136	AAA	14	6	16	NA	YAL046C	75	114	127	3099	0.7834	26293	14126	27140	14708	75	113	132	3222	0.87	27835	15032	28776	15468	76	114	128	3237	0.8444	28859	16076	30099	15854	76	113	130	3197	0.8385	29481	16182	30558	17164	-0.0541603	-0.0235476	0.0184466	-0.0559112	-0.0345228	-0.0259301
Plate07	200	AAA	7	9	8	SIM1	YIL123W	49	130	130	3117	0.8622	16350	7800	17368	8229	49	129	133	3140	0.8942	17069	8101	18005	8339	50	130	133	3184	0.8332	16669	7764	17505	8135	50	129	141	3304	0.8174	17125	8059	17904	8347	-0.0704127	-0.0278401	-0.043221	-0.0382641	-0.0503361	-0.0291466
Plate14	182	AAA	14	8	14	UBP16	YPL072W	79	118	158	3765	0.863	24613	12763	25810	12824	79	117	158	3681	0.8518	24110	12791	24963	12944	80	118	161	3834	0.8678	24681	13110	25612	13587	80	117	163	3776	0.7984	23306	12568	24246	12638	0.0416632	-0.0234272	-0.0452458	-0.0385024	-0.00394229	-0.0390136
Plate10	127	AAA	10	6	7	MMT1	YMR177W	75	36	179	4202	0.8694	8537	4153	8958	4250	75	35	172	4143	0.8395	8927	4281	9148	4343	76	36	91	2291	0.8812	9227	4310	9154	4289	76	35	173	4179	0.8224	9505	4577	9902	4694	-0.0380536	-0.0348073	-0.0169771	-0.0172197	-0.0695008	-0.0430634
Plate03	238	AAA	3	10	22	MET32	YDR253C	19	102	140	3143	0.8396	28003	12918	28786	12518	19	101	161	3645	0.853	28943	13629	29679	13266	20	102	161	3544	0.8143	29278	13730	29915	13092	20	101	165	3718	0.7803	29639	14215	30089	13755	-0.010925	-0.0181058	0.0104135	-0.0319315	-0.0417948	-0.041218
Plate06	329	AAA	6	14	17	RPL34B	YIL052C	59	64	133	3145	0.87	16248	8753	17077	8726	59	63	135	3297	0.8517	17806	9733	18272	9360	60	64	142	3318	0.833	17199	9398	17549	9282	60	63	144	3297	0.8031	17063	9256	17882	9223	0.026119	0.0315699	-0.0177768	0.0193586	-0.0230214	-0.032219
Plate14	278	AAA	14	12	14	AAD3	YCR107W	87	118	150	3795	0.8363	32565	18315	32915	18734	87	117	172	4025	0.8522	29148	16443	29841	16689	88	118	172	4184	0.8105	30638	16764	31307	16934	88	117	180	4279	0.8956	31712	17775	32143	18100	-0.0402931	-0.059911	0.000659364	-0.0378011	-0.0281138	-0.0690699
Plate02	163	AAA	2	7	19	KAR4	YCL055W	13	60	165	3967	0.8382	21963	12618	21701	13049	13	59	151	3580	0.8469	19635	11006	19703	11399	14	60	166	3956	0.8598	21164	11903	21485	12422	14	59	161	3968	0.8378	22736	12648	22297	12387	-0.138791	-0.114179	-0.0901288	-0.0279447	-0.051808	-0.0445636
Plate11	261	AAA	11	11	21	SAL1	YNL083W	53	8	162	3589	0.7492	15348	6162	15633	6229	53	7	152	3499	0.7936	15195	6117	15466	6189	54	8	168	3813	0.781	15722	6374	15855	6401	54	7	154	3392	0.7856	15029	6050	15174	6130	-0.00260596	-0.00965057	-0.0197066	-0.0248447	-0.00996681	-0.0147842
Plate14	141	AAA	14	6	21	KTR7	YIL085C	75	104	130	3069	0.874	18077	9181	18541	9269	75	103	132	3018	0.8433	17587	9083	18754	9202	76	104	127	3017	0.8552	18599	9338	19599	9500	76	103	117	2758	0.8209	17707	8952	18787	9194	-0.0467494	-0.0193701	0.00614462	-0.0154865	-0.0349102	-0.0621481
Plate07	250	AAA	7	11	10	REV7	YIL139C	53	126	165	4034	0.8541	21842	11100	23045	11490	53	125	151	3848	0.871	22414	11360	23151	11632	54	126	166	4008	0.8894	21953	11228	22993	11691	54	125	153	3760	0.8303	21910	11060	22928	11391	-0.0201037	-0.0277445	-0.0452904	-0.0177761	-0.0309462	-0.0184078
Plate06	270	AAA	6	12	6	NA	YHR140W	55	86	146	3555	0.8387	16367	8836	17362	9020	55	85	143	3632	0.9099	16541	8982	17669	9310	56	86	149	3622	0.8563	15878	8602	16771	8884	56	85	146	3700	0.9173	16730	9055	17502	9168	0.00546519	-0.0116442	-0.0258648	-0.00481471	-0.0250896	-0.0318288
Plate03	68	AAA	3	3	20	NA	YDL186W	5	106	140	3198	0.8562	31096	15626	32730	15815	5	105	145	3282	0.7977	32627	16607	34194	16607	6	106	128	3023	0.8433	31491	15389	33025	15597	6	105	135	3118	0.8037	32146	16155	33937	16172	-0.026222	0.00305422	0.00482666	0.0168911	-0.0597874	-0.0376096
Plate02	67	AAA	2	3	19	FUS1	YCL027W	5	60	168	3982	0.8655	25267	14617	25838	15175	5	59	159	3812	0.8634	26015	14426	26084	14741	6	60	170	4091	0.8497	24491	14391	24697	14780	6	59	162	3857	0.8524	23830	14157	23536	14908	-0.0602981	-0.00746953	-0.0972961	-0.184669	-0.028429	0.0345196
Plate11	227	AAA	11	10	11	FIG4	YNL325C	51	28	184	4448	0.7396	19763	8083	20054	8218	51	27	186	4481	0.7834	19728	8150	19859	8337	52	28	153	3667	0.7877	18672	7696	19015	7783	52	27	158	3744	0.7905	18618	7236	18779	7382	-0.0363871	-0.0713249	-0.033106	0.0254246	-0.0278124	-0.0423951
Plate09	173	AAA	9	8	5	ROM2	YLR371W	15	136	187	4189	0.8266	28401	11062	28632	11133	15	135	195	4356	0.7878	28016	10815	28264	10908	16	136	191	4269	0.7749	28219	10968	28531	11031	16	135	191	4259	0.8257	28479	11051	28794	11152	-0.0400722	-0.0321259	-0.0329712	-0.0337736	-0.0231949	-0.0133106
Plate08	200	AAA	8	9	8	BYE1	YKL005C	17	82	229	5001	0.8131	27661	11567	28058	11752	17	81	191	4184	0.8304	26965	11257	27514	11370	18	82	212	4595	0.8211	27537	11661	28170	11822	18	81	223	5092	0.8265	28156	11945	28488	12136	-0.0324656	-0.0216036	-0.0336395	-0.0489485	-0.0104238	-0.0174574
Plate03	308	AAA	3	13	20	GCV1	YDR019C	25	106	118	2827	0.8096	37064	19410	38384	19828	25	105	129	3101	0.8458	38826	22974	39701	23901	26	106	112	2676	0.8687	38542	23053	40051	23189	26	105	122	2981	0.8625	39550	23705	40826	25079	0.0345391	-0.0907105	-0.0439322	-0.0857341	0.0317714	-0.0560322
Plate10	170	AAA	10	8	2	NA	YMR103C	79	46	143	3576	0.8292	8731	3984	8563	3952	79	45	157	3818	0.8872	7927	3713	8267	3790	80	46	171	4165	0.8496	8467	4165	8816	4140	80	45	129	3095	0.8515	7861	3746	8289	3914	-0.00981249	-0.0077556	-0.0274265	-0.0469421	0.0213837	-0.0292125
Plate11	290	AAA	11	13	2	YRF1-6	YNL339C	57	46	169	3628	0.7396	23933	9590	24464	9814	57	45	180	4008	0.7972	23750	9645	24193	9856	58	46	177	3809	0.8182	24223	9577	24785	9723	58	45	169	3669	0.7737	23897	9641	24332	9705	-0.0221358	-0.0439193	0.0098659	-0.0127564	-0.0123817	-0.0315889
Plate01	260	AAA	1	11	20	NA	YAL068C	21	10	137	3270	0.8576	13710	7118	14178	7542	21	9	149	3410	0.8548	13372	6875	13980	7080	22	10	142	3409	0.8787	13495	6936	14012	7239	22	9	162	3666	0.8641	12599	6381	13195	6741	-0.0688402	-0.00469102	-0.031294	-0.0266063	-0.034674	-0.0247091
Plate04	290	AAA	4	13	2	HLR1	YDR528W	57	46	164	3915	0.8731	12063	6291	12515	6602	57	45	158	3891	0.8728	11972	6233	12441	6567	58	46	168	4050	0.8459	11918	6217	12397	6586	58	45	158	3876	0.8384	11635	6006	12115	6349	-0.0736518	-0.0748064	-0.0841014	-0.0658415	-0.0361893	-0.033983
Plate02	275	AAA	2	12	11	UGX2	YDL169C	23	76	155	3605	0.8762	18434	10093	18820	10021	23	75	147	3439	0.7974	18236	9980	18744	9819	24	76	142	3351	0.8297	18848	10476	19180	10211	24	75	144	3568	0.8717	17931	9756	18157	9562	-0.0177718	0.00251594	-0.0124923	-0.0128824	-0.0276157	-0.0294502
Plate10	303	AAA	10	13	15	NA	YMR010W	89	20	173	4630	0.8523	10419	5196	10473	5135	89	19	170	4437	0.8369	10405	5026	10502	5181	90	20	92	2511	0.865	10456	4895	10737	5049	90	19	183	4700	0.8187	10886	5402	11265	5444	-0.0515005	-0.0592239	0.00957261	-0.0176459	-0.0726481	-0.0292763
Plate06	126	AAA	6	6	6	SBE22	YHR103W	43	86	116	2760	0.8368	12827	6735	13607	7163	43	85	123	2975	0.8511	13398	7161	14064	7519	44	86	113	2647	0.8801	13125	6921	13824	7181	44	85	116	2846	0.8261	13253	7083	13951	7363	-0.0460782	-0.0625776	-0.0255476	-0.0460204	-0.0180479	-0.0366115
Plate01	82	AAA	1	4	10	FAT1	YBR041W	7	30	146	3469	0.8755	15962	8211	16124	8525	7	29	143	3451	0.8486	14980	7844	15014	8135	8	30	134	3148	0.8613	14920	7887	15138	8240	8	29	137	3236	0.8598	14670	7547	15067	7781	-0.0378482	-0.0836683	-0.0884476	-0.0180086	-0.000201752	-0.0338088
Plate01	43	AAA	1	2	19	TPS1	YBR126C	3	12	128	3407	0.8162	27168	15177	27944	15887	3	11	149	3869	0.8534	23671	12122	23520	12156	4	12	113	2942	0.8221	22046	11764	22904	12287	4	11	109	3073	0.852	25240	15260	25388	15815	-0.0307942	0.0625841	0.0072967	-0.172945	-0.0220102	0.0695499
Plate09	356	AAA	9	15	20	NA	YLR072W	29	106	182	3861	0.7242	28380	10983	28930	10917	29	105	183	4009	0.754	28106	10980	28660	11013	30	106	167	3384	0.7126	28195	10829	28830	10931	30	105	173	3742	0.7794	28751	11233	29415	11281	0.0023494	-0.0238622	-0.00468032	-0.0168567	-0.0145712	-0.0289972
Plate07	221	AAA	7	10	5	HAM1	YJR069C	51	136	139	3271	0.8901	15452	7154	16421	7247	51	135	133	3062	0.797	15528	7278	16712	7620	52	136	138	3237	0.8741	16104	7421	17077	7484	52	135	132	3205	0.9026	16470	7666	17438	8006	-0.00409249	-0.0378196	0.0200408	-0.0296126	-0.0312807	-0.0452648
Plate03	103	AAA	3	5	7	TVP15	YDR100W	9	132	143	3418	0.86	25700	11500	26950	11595	9	131	158	3869	0.8783	29995	14072	31412	14793	10	132	147	3623	0.8825	27424	12227	28230	12186	10	131	154	3756	0.8898	26435	11878	27719	12016	-0.0465287	-0.0309738	-0.0170729	-0.0347677	-0.0661007	-0.0118393
Plate06	175	AAA	6	8	7	NA	YIL015C-A	47	84	124	3093	0.8174	13746	7268	14747	7622	47	83	117	2877	0.8514	13228	7112	13853	7380	48	84	108	2822	0.8516	13354	7002	14185	7278	48	83	118	2838	0.8807	12971	6915	13889	7318	-0.00953103	-0.0598547	-0.0049148	-0.0443549	-0.0183569	-0.0464306
Plate06	283	AAA	6	12	19	PRM2	YIL037C	55	60	154	3574	0.8305	19694	10771	20461	11061	55	59	165	3880	0.7958	20178	10953	21252	11216	56	60	159	3759	0.8868	19913	11005	21252	11355	56	59	151	3627	0.8453	19288	10741	19248	10482	-0.0282435	0.00966551	-0.00733411	-0.0460968	-0.0213465	-0.00816233
Plate02	310	AAA	2	13	22	SUL1	YBR294W	25	54	100	2344	0.863	8559	4104	9178	4266	25	53	NA	NA	NA	NA	NA	NA	NA	26	54	42	1068	0.8984	NA	4744	NA	5100	26	53	77	NA	NA	1127	241	1101	223	-0.0540541	NA	NA	-0.0910837	-0.0481433	NA
Plate01	295	AAA	1	13	7	SRO77	YBL106C	25	36	134	3016	0.8521	15365	8177	16490	8453	25	35	154	3404	0.8701	15857	8264	16863	8425	26	36	125	2839	0.8567	16162	8422	17301	8930	26	35	156	3456	0.8677	16330	8457	17292	8742	0.00801254	0.0467648	0.00728601	0.035272	-0.0523098	-0.0190178
Plate10	324	AAA	10	14	12	CIN4	YMR138W	91	26	110	2587	0.8386	7627	3417	8078	3602	91	25	173	4283	0.8795	9522	4677	9766	4660	92	26	122	2920	0.8437	7655	3492	8142	3543	92	25	172	4217	0.8808	9321	4706	9795	4750	0.025018	-0.0287634	0.0593831	-0.0499058	0.025636	-0.0658048
Plate03	335	AAA	3	14	23	PDR15	YDR406W	27	100	188	4167	0.7681	41477	26146	42449	26825	27	99	197	4236	0.8352	41017	24546	41717	25609	28	100	193	4267	0.8008	40504	23973	41280	24708	28	99	189	4094	0.7848	41458	25623	42554	26783	-0.0780515	-0.0654757	-0.0500136	-0.0718096	-0.0631072	-0.0205502
Plate14	54	AAA	14	3	6	NA	YPL272C	69	134	169	3813	0.7938	21058	11045	21629	11015	69	133	170	3870	0.8116	20990	10900	21546	10871	70	134	163	3722	0.8922	20836	10894	21327	10988	70	133	159	3707	0.8366	22377	11358	22573	11451	-0.0376728	-0.0262557	-0.0563809	-0.0220477	-0.0521354	-0.0392884
Plate11	279	AAA	11	12	15	NA	YNL335W	55	20	165	4056	0.8164	17906	7287	18119	7408	55	19	176	4131	0.8108	18074	7347	18309	7448	56	20	181	4359	0.7898	18751	7597	19124	7746	56	19	186	4247	0.7643	18401	7431	18779	7641	-0.0313571	-0.0240126	-0.0179919	-0.0243826	-0.0196769	-0.0179006
Plate14	88	AAA	14	4	16	NA	YOR248W	71	114	136	3430	0.8097	22088	11380	21786	11704	71	113	147	3791	0.8606	22720	11757	22411	11786	72	114	149	3675	0.867	21563	11423	21230	11640	72	113	142	3555	0.8596	22958	12079	22864	12532	-0.1065	-0.0712578	-0.139759	-0.120307	-0.0187051	-0.0188169
Plate06	129	AAA	6	6	9	NA	YIL001W	43	80	104	2793	0.8697	15298	8191	16144	8600	43	79	118	2999	0.8608	15074	8116	15974	8520	44	80	111	2821	0.8553	15053	8095	15907	8481	44	79	110	2789	0.8777	15197	8171	16078	8656	-0.038622	-0.0417407	-0.041775	-0.0537368	-0.021961	-0.0314686
Plate14	356	AAA	14	15	20	NA	YPR076W	93	106	110	2459	0.8419	20779	10871	22344	11262	93	105	129	2825	0.8448	22930	12038	24580	12339	94	106	113	2484	0.8092	21205	11073	21652	10909	94	105	103	2261	0.8168	23188	11909	24719	12350	-0.0161224	0.0143338	-0.0232128	0.0221029	-0.0512174	-0.0361657
Plate03	67	AAA	3	3	19	PPH3	YDR075W	5	108	170	3854	0.8176	31510	15171	32909	15411	5	107	147	3305	0.8204	28672	13924	30010	13767	6	108	159	3571	0.8583	28910	13838	30611	14262	6	107	151	3548	0.8466	32013	15538	33205	15509	0.0109964	-0.0376403	-0.0392487	0.0207444	-0.0040848	-0.0814477
Plate10	180	AAA	10	8	12	SNZ1	YMR096W	79	26	123	3075	0.8708	7930	3651	8392	3743	79	25	115	2939	0.8464	8313	3930	8742	4062	80	26	63	1551	0.8154	6339	2929	6512	3121	80	25	152	3756	0.8359	8062	3866	8417	3984	0.0321462	-0.0148436	-0.114252	-0.0471552	-0.00563652	-0.0345301
Plate08	78	AAA	8	4	6	NA	YKL202W	7	86	142	2917	0.8062	24210	9762	24684	9831	7	85	195	4228	0.8337	26226	10918	26430	10943	8	86	192	4171	0.7688	26235	10866	26316	10929	8	85	170	3710	0.7702	25817	10723	26174	10823	-0.00561048	-0.0365426	-0.041778	-0.0377988	-0.00868477	-0.0235769
Plate06	135	AAA	6	6	15	SET5	YHR207C	43	68	128	3121	0.7443	17218	9442	18295	9631	43	67	133	3295	0.8255	17908	9711	18685	9942	44	68	141	3459	0.8469	17890	9727	18421	9871	44	67	128	3255	0.8454	18506	10100	19380	10231	-0.00588059	-0.0179193	-0.0294779	-0.00237524	-0.0406206	-0.0205116
Plate14	140	AAA	14	6	20	NA	YKR104W	75	106	123	3005	0.8538	20380	10172	21052	10285	75	105	145	3307	0.8767	20371	10774	21335	10846	76	106	145	3480	0.7965	21457	11650	22363	11617	76	105	107	2637	0.879	20102	9934	21440	10231	0.0110571	-0.0385719	-0.0556489	0.0464771	0.00878702	-0.0695851
Plate06	131	AAA	6	6	11	NA	YHR210C	43	76	125	3116	0.8707	15922	8587	16715	8991	43	75	115	2884	0.8753	15993	8626	17164	8958	44	76	127	3173	0.8503	15789	8495	16724	8844	44	75	131	3158	0.8327	15982	8655	17219	8952	-0.0473948	-0.00234421	-0.0238845	0.00340476	-0.027039	-0.0266103
Plate02	174	AAA	2	8	6	ERP3	YDL018C	15	86	158	3883	0.8789	31718	19472	31896	20326	15	85	151	3525	0.8713	29123	17300	29580	18046	16	86	137	3367	0.8633	29566	17623	29503	18321	16	85	158	3781	0.8201	29316	17192	29868	17857	-0.105562	-0.0713868	-0.0951536	-0.0423403	-0.0512295	-0.0292917
Plate10	218	AAA	10	10	2	ASI1	YMR119W	83	46	171	4257	0.8773	10314	5026	10365	5179	83	45	163	4078	0.8025	10397	5061	10363	5044	84	46	164	4204	0.816	11957	5725	12041	5856	84	45	171	4186	0.8778	10074	4973	9923	4937	-0.0789455	-0.0437434	-0.012961	-0.081796	-0.0426288	-0.0399203
Plate09	191	AAA	9	8	23	DCR2	YLR361C	15	100	138	2964	0.7442	25721	9755	26379	9811	15	99	160	3403	0.7691	26549	10297	27429	10383	16	100	157	3299	0.7226	26339	10033	27147	10142	16	99	178	3742	0.7458	26950	10498	27495	10559	0.00517372	-0.0112613	0.00459082	-0.0303065	-0.00475545	-0.0290674
Plate14	283	AAA	14	12	19	MCH5	YOR306C	87	108	135	3148	0.8817	22370	11739	23665	11790	87	107	130	3087	0.8646	22903	11874	24076	11982	88	108	135	3136	0.8396	22572	11832	23702	11821	88	107	127	2983	0.8651	21875	11400	23114	11487	0.0138993	0.0198692	0.012915	0.0110422	-0.0407629	-0.0196562
Plate11	177	AAA	11	8	9	DAL82	YNL314W	47	32	201	4929	0.7976	21793	8777	21742	8820	47	31	197	4607	0.807	22226	9059	22597	9159	48	32	190	4507	0.8244	21163	8505	21390	8585	48	31	198	4844	0.7925	21697	8741	21932	8861	-0.0264576	-0.0285753	-0.00942617	-0.0211354	-0.0107517	-0.0301314
Plate08	170	AAA	8	8	2	NA	YKR012C	15	94	220	4662	0.8007	28100	12008	28435	12220	15	93	209	4450	0.8287	27858	11594	28350	11741	16	94	214	4501	0.7562	27859	11788	28222	11964	16	93	213	4533	0.8239	27817	11717	28150	11925	-0.0607146	-0.0146154	-0.045912	-0.0458576	-0.0318542	-0.00182582
Plate13	227	AAA	13	10	11	BOP1	YPL221W	83	76	85	2200	0.8957	13030	6251	13691	6463	83	75	137	3565	0.8326	17207	8518	18179	8956	84	76	81	1966	0.8081	11874	5847	12617	6188	84	75	77	1862	0.8405	11744	5808	12820	6158	0.0127894	0.00982979	-0.0552831	-0.0240802	-0.00943851	2.98e-05
Plate13	307	AAA	13	13	19	NA	YPL017C	89	60	166	4164	0.8409	18974	9346	19678	9448	89	59	57	1592	0.8497	19507	11877	19967	12277	90	60	102	2584	0.8901	18723	9245	19217	9431	90	59	105	2727	0.7979	21654	10453	22285	10691	0.0588462	-0.274174	0.0249913	0.0814427	0.0239255	-0.259096
Plate07	263	AAA	7	11	23	MAD2	YJL030W	53	100	184	4313	0.7602	25732	13800	26542	14380	53	99	178	4093	0.8309	26184	14036	27155	14584	54	100	171	4167	0.8016	26250	13853	27121	13935	54	99	185	4316	0.7961	26582	14089	27457	14132	-0.0641373	-0.0437519	0.0102768	0.0133256	-0.0403794	-0.0334694
Plate04	262	AAA	4	11	22	ITR1	YDR497C	53	6	205	4784	0.8596	23276	12133	24199	12475	53	5	188	4529	0.8621	22630	12065	23098	11898	54	6	187	4535	0.8577	23539	12377	23958	12848	54	5	189	4499	0.841	22854	11916	23404	11913	-0.00742389	-0.00915347	-0.063752	0.00844519	-0.0193975	-0.0523527
Plate09	279	AAA	9	12	15	NA	YLR391W	23	116	225	5071	0.8066	29224	11339	29587	11342	23	115	226	5183	0.7622	29263	11556	29556	11655	24	116	222	5139	0.8116	29346	11414	29545	11429	24	115	225	5084	0.8366	29353	11322	29682	11441	-0.0153062	-0.0539808	-0.0278732	-0.022253	-0.0133885	-0.0372344
Plate13	209	AAA	13	9	17	SCP1	YOR367W	81	64	26	564	0.8036	NA	3381	NA	3546	81	63	93	2426	0.8285	15331	7527	16036	7890	82	64	191	4838	0.8623	17442	8708	18395	8834	82	63	173	4258	0.8373	16326	8566	17044	8909	NA	-0.0116523	0.0464862	-0.0819239	NA	-0.00972174
Plate14	37	AAA	14	2	13	VTC2	YFL004W	67	120	171	4133	0.8861	24091	12445	24408	12727	67	119	166	4078	0.8341	23400	12262	23409	12620	68	120	161	3992	0.8527	23394	12441	23499	12394	68	119	158	4016	0.8176	24527	13161	24399	13331	-0.0370907	-0.0922597	-0.0626067	-0.0979407	-0.00377285	-0.0292623
Plate07	269	AAA	7	12	5	CSN12	YJR084W	55	136	85	1985	0.8082	14262	6536	15428	6820	55	135	143	3474	0.8089	19205	9140	19517	9180	56	136	109	2571	0.8643	14396	6778	14890	6772	56	135	101	2502	0.8588	16293	7381	16874	7461	-0.0306316	-0.0149977	-0.0799808	0.00426592	-0.0452742	0.00755114
Plate13	178	AAA	13	8	10	FMP30	YPL103C	79	78	60	1600	0.8641	15238	8951	14903	9024	79	77	119	3039	0.85	21567	10595	21085	10482	80	78	177	4368	0.833	21150	10948	21717	11218	80	77	111	2853	0.8022	22412	10763	21966	11044	-0.305357	0.0236778	-0.0233446	0.0152994	-0.253264	0.049367
Plate07	258	AAA	7	11	18	FLX1	YIL134W	53	110	171	4145	0.8478	35160	20375	36561	20898	53	109	165	3876	0.8517	34316	20165	35660	20294	54	110	165	3987	0.8187	35226	20295	35887	20060	54	109	163	3897	0.8546	35477	20619	36658	20465	0.0088121	0.00303943	0.0277591	0.0387633	-0.0201073	-0.0469646
Plate02	254	AAA	2	11	14	ZSP1	YBR287W	21	70	135	3187	0.8513	17015	9397	17472	9405	21	69	143	3334	0.8541	17616	9566	18343	9609	22	70	140	3364	0.8645	17998	9660	19093	9878	22	69	144	3391	0.8302	17883	9737	18783	9993	-0.0517923	-0.00324612	0.0237448	-0.0172098	-0.0571654	-0.0268994
Plate13	186	AAA	13	8	18	FMP14	YPL099C	79	62	183	4531	0.8076	16845	8793	17524	9165	79	61	65	1478	0.8177	NA	5471	NA	5605	80	62	116	2838	0.8304	15073	7302	15804	7692	80	61	NA	NA	NA	NA	NA	NA	NA	-0.0776241	NA	0.000169639	NA	-0.0755545	NA
Plate06	257	AAA	6	11	17	ARN2	YHL047C	53	64	133	3188	0.7904	18141	9905	18922	9824	53	63	126	3063	0.8058	18474	10125	19472	10276	54	64	134	3217	0.8249	18302	9945	19052	9965	54	63	130	3146	0.8049	18692	10212	19582	10254	0.0175328	-0.00129387	0.00820835	0.0101466	-0.0284794	-0.0315825
Plate13	66	AAA	13	3	18	PTP2	YOR208W	69	62	97	2140	0.8575	10636	4777	10935	4992	69	61	68	NA	NA	705	121	703	111	70	62	141	3377	0.8952	13273	6219	13816	6424	70	61	54	1189	0.8732	NA	3879	NA	4037	0.00887642	-0.15219	0.0349433	NA	0.0374351	-0.168815
Plate11	271	AAA	11	12	7	CIT1	YNR001C	55	36	187	4487	0.8171	25038	9964	25452	10100	55	35	196	4580	0.8378	24768	9942	25223	10156	56	36	186	4303	0.832	24880	9942	25376	10117	56	35	193	4290	0.8009	24372	9770	25172	9993	-0.011229	-0.0319861	-0.0178728	-0.0102444	-0.00787733	-0.0194249
Plate11	276	AAA	11	12	12	JJJ1	YNL227C	55	26	146	3202	0.8411	18162	7385	18539	7444	55	25	131	2901	0.7722	17283	6944	17379	7092	56	26	155	3353	0.8108	18226	7395	18347	7516	56	25	149	3226	0.8129	17866	7272	18285	7383	-0.0052026	-0.0295192	-0.0341099	-0.0132955	-0.0182798	-0.00239829
Plate06	104	AAA	6	5	8	TDH3	YGR192C	41	82	164	3935	0.8494	18742	10219	19758	10543	41	81	161	3975	0.8392	18681	10210	19589	10625	42	82	163	4046	0.8855	18569	10198	19126	10621	42	81	162	4052	0.84	19067	10415	19863	10719	-0.014725	-0.0383485	-0.0738448	-0.0295892	-0.0227734	-0.0264433
Plate01	194	AAA	1	9	2	NA	YAL066W	17	46	176	3996	0.8135	21837	11908	22238	12431	17	45	186	4293	0.8504	20099	10900	20816	11268	18	46	175	4040	0.8842	23118	12499	23648	13131	18	45	180	4252	0.8615	21715	11689	22301	12141	-0.053813	-0.0230849	-0.0328195	-0.0176801	-0.0297798	-0.0363551
Plate07	282	AAA	7	12	18	CPS1	YJL172W	55	110	145	3522	0.8047	22842	11698	23306	11571	55	109	126	3060	0.8457	22647	11462	23553	11991	56	110	132	3222	0.8549	22378	11446	23483	11695	56	109	147	3444	0.8101	22411	11462	23335	11611	-0.0102416	-0.0369804	-0.0109628	-0.0124627	-0.0248751	-0.0129716
Plate07	161	AAA	7	7	17	HYR1	YIR037W	45	112	125	2968	0.8152	21683	10935	22896	11268	45	111	140	3300	0.8462	22303	11249	23844	11605	46	112	134	3169	0.7915	21619	10951	22792	11143	46	111	142	3287	0.8296	22364	11432	23623	11753	-0.00663368	0.0237389	-0.000316398	-0.00728719	-0.0237974	-0.0140178
Plate04	106	AAA	4	5	10	PPN1	YDR452W	41	30	175	4199	0.8318	15963	8307	16712	8612	41	29	159	4068	0.8139	16425	8550	17098	8800	42	30	165	4160	0.8401	16232	8500	16806	8799	42	29	165	4292	0.7957	16861	8834	17530	9225	-0.0267426	-0.0238719	-0.0489866	-0.0541382	-0.0260708	-0.0258391
Plate02	195	AAA	2	9	3	ADP1	YCR011C	17	92	178	4078	0.8795	30400	18144	30800	19248	17	91	183	4051	0.8823	28408	16800	29188	17728	18	92	171	4097	0.8985	31475	18900	31490	19693	18	91	167	4000	0.8772	30955	18720	31198	19323	-0.0907995	-0.0694783	-0.0851074	-0.0754066	-0.0249125	-0.0294743
Plate10	58	AAA	10	3	10	ATG17	YLR423C	69	30	185	4447	0.8559	9098	4329	9336	4301	69	29	170	4284	0.8392	9212	4399	9468	4433	70	30	177	4379	0.8483	9217	4424	9480	4457	70	29	171	4379	0.8313	9220	4413	9371	4393	0.00960579	-0.00939566	-0.014702	-0.0130803	-0.0294532	-0.032433
Plate02	111	AAA	2	5	15	NA	YCL042W	9	68	181	4192	0.8062	23473	13555	24101	13930	9	67	169	4084	0.8706	23172	13229	23586	13869	10	68	159	3836	0.8932	24989	14174	25272	14584	10	67	168	4141	0.848	23462	13481	23794	14016	-0.058599	-0.0869656	-0.0434965	-0.0868817	-0.0432932	-0.0310865
Plate06	80	AAA	6	4	8	NA	YHR079C-B	39	82	112	2676	0.8557	14155	7469	14974	7896	39	81	108	2563	0.8314	14368	7649	15510	8081	40	82	115	2760	0.8606	14007	7512	14906	7936	40	81	110	2723	0.8013	14403	7748	15507	8141	-0.0349417	-0.0135754	-0.0487635	-0.0240261	-0.0117397	-0.0220485
Plate12	247	AAA	12	11	7	NA	YOL111C	53	84	178	3910	0.9013	20953	8402	21464	8638	53	83	178	3949	0.7942	21073	8524	21413	8643	54	84	183	4235	0.8501	21879	8887	22292	9074	54	83	191	4318	0.8507	22020	8939	22399	9161	-0.0175574	-0.0220477	-0.0224648	-0.0272937	-0.0146674	-0.0251413
Plate07	255	AAA	7	11	15	MHP1	YJL042W	53	116	140	3325	0.7989	21933	11036	23102	11206	53	115	138	3258	0.8664	21617	10940	22912	11417	54	116	138	3309	0.829	21693	10979	22832	11069	54	115	139	3385	0.8288	22333	11345	23331	11325	0.0149516	-0.0217487	0.0108241	0.0181221	-0.0168916	-0.02931
Plate09	47	AAA	9	2	23	NKP2	YLR315W	3	100	201	3982	0.6902	25562	9875	26156	10001	3	99	199	4016	0.7057	26272	10174	26732	10294	4	100	184	3643	0.7274	24987	9375	25656	9519	4	99	186	3824	0.7428	25388	9673	26075	9839	-0.0337079	-0.0391449	0.00294576	-0.0165167	-0.0307601	-0.0289114
Plate14	111	AAA	14	5	15	NA	YPR126C	73	116	150	3801	0.877	24125	12609	23920	12499	73	115	137	3518	0.8569	22698	11838	22640	12112	74	116	135	3585	0.8148	24721	12759	24246	12855	74	115	144	3716	0.8591	21814	11761	22024	11538	-0.0455392	-0.0911176	-0.0606621	-0.0706453	-0.0189961	-0.0295069
Plate14	251	AAA	14	11	11	MLC2	YPR188C	85	124	178	4224	0.8259	27050	14551	27179	14908	85	123	179	4415	0.8475	27220	14522	27782	14467	86	124	167	3998	0.8272	25905	14117	26360	14315	86	123	180	4289	0.8379	26756	14319	27083	14890	-0.0690518	0.00456024	-0.0663745	-0.0732169	-0.0286667	-0.0161737
Plate06	202	AAA	6	9	10	HSV2	YGR223C	49	78	126	3070	0.8064	13935	7432	14703	7795	49	77	119	2952	0.8473	13998	7552	14646	7829	50	78	132	3224	0.841	13920	7314	14511	7587	50	77	109	2687	0.827	14232	7578	14898	7838	-0.0448725	-0.0567229	-0.0276072	-0.0325082	-0.0285087	-0.043781
Plate14	253	AAA	14	11	13	ATG13	YPR185W	85	120	124	2925	0.8827	20096	10188	21294	10060	85	119	143	3302	0.853	21009	11013	22179	11071	86	120	128	3044	0.8758	22029	11412	23400	11427	86	119	130	3170	0.8998	22367	11671	23483	11743	0.0582545	-0.00513907	0.0372485	0.00699236	-0.0148283	-0.0518056
Plate07	189	AAA	7	8	21	RAD26	YJR035W	47	104	143	3248	0.8198	23786	12463	25011	12656	47	103	91	2132	0.8028	23067	11720	24421	12112	48	104	144	3353	0.8681	24513	12946	25126	12925	48	103	86	2026	0.836	22524	11325	24322	11701	-0.00465324	0.0102665	-0.0230616	0.0462635	-0.0393467	-0.0113721
Plate14	42	AAA	14	2	18	MUP1	YGR055W	67	110	164	3555	0.8302	19794	10278	20897	10429	67	109	140	3126	0.8261	18156	9276	18701	9205	68	110	119	2718	0.8706	18425	9103	19755	9225	68	109	156	3485	0.8306	19218	9863	19727	9594	-0.0189248	-0.0241839	0.0577243	0.00304017	-0.0499189	-0.0422853
Plate09	207	AAA	9	9	15	TIS11	YLR136C	17	116	182	4108	0.6846	27787	10684	28177	10675	17	115	189	4278	0.7952	27900	10891	28319	10862	18	116	197	4525	0.7541	28433	11001	28876	10894	18	115	190	4157	0.7913	27464	10592	28160	10471	-0.00757155	-0.0234216	0.00235855	0.0176354	-0.00929658	-0.0291598
Plate07	276	AAA	7	12	12	ATG27	YJL178C	55	122	129	3104	0.8654	18509	9015	19668	9107	55	121	124	3030	0.8541	19222	9447	20222	9590	56	122	129	3081	0.8964	18724	9040	19775	9138	56	121	131	3189	0.8793	19593	9490	20703	9567	0.00758434	-0.0109975	0.01227	0.0306228	-0.034519	-0.032999
Plate10	352	AAA	10	15	16	NA	YML037C	93	18	169	4344	0.8533	12214	6036	12254	6284	93	17	175	4263	0.8785	10081	5077	10515	5139	94	18	123	2994	0.8129	10598	4972	10880	5100	94	17	137	3385	0.8473	10676	5134	11243	5324	-0.0806528	-0.0463779	0.0164605	0.00929216	-0.0355628	-0.0911456
Plate09	183	AAA	9	8	15	NA	YLR365W	15	116	219	5101	0.7548	28754	11108	29037	11180	15	115	220	5042	0.8278	28659	11131	29094	11123	16	116	222	4931	0.7769	28497	10975	29040	11018	16	115	223	4810	0.8134	28092	10999	28622	11036	-0.024354	-0.0144134	-0.00436158	-0.0287216	-0.0100186	-0.0178774
Plate09	224	AAA	9	10	8	NA	YLR278C	19	130	205	4627	0.8135	28941	11163	29410	11318	19	129	218	4850	0.804	28693	11179	29158	11328	20	130	212	4917	0.7886	29314	11441	29908	11565	20	129	215	4818	0.8218	28884	11222	29415	11449	-0.0215711	-0.035895	-0.0253912	-0.036974	-0.00687479	-0.0219322
Plate14	335	AAA	14	14	23	MFA1	YDR461W	91	100	137	2924	0.8874	18237	9568	19046	9695	91	99	147	3209	0.8203	20045	10004	21015	10076	92	100	147	3165	0.8238	19785	10244	20624	10260	92	99	144	3180	0.8768	19931	10022	20853	10218	-0.0653269	0.0356391	-0.01764	0.00498189	-0.0776968	0.00598842
Plate02	62	AAA	2	3	14	SLX1	YBR228W	5	70	181	4123	0.8875	25172	14349	26190	14355	5	69	169	3999	0.8513	25961	14803	26663	15365	6	70	179	4266	0.8587	25525	15087	26162	15455	6	69	174	3974	0.8261	24406	14191	24911	14292	0.0335557	-0.0268089	-0.0644296	-0.0398615	-0.0097806	-0.00290124
Plate08	159	AAA	8	7	15	CWP2	YKL096W-A	13	68	206	4730	0.8103	27570	11570	27874	11580	13	67	184	4123	0.8276	27049	11203	27670	11227	14	68	195	4316	0.8017	27138	11285	27531	11264	14	67	186	4381	0.7692	27485	11701	27823	11692	-0.0242055	0.00369913	-0.00859033	-0.0394529	-0.0161063	-0.00633289
Plate04	109	AAA	4	5	13	NA	YEL020C	41	24	165	4229	0.8868	17897	9441	18511	9706	41	23	153	4109	0.8321	19800	10281	20218	10659	42	24	163	4428	0.8755	19201	9944	19793	10154	42	23	159	4133	0.865	19188	10106	19417	10307	-0.0462946	-0.0493945	-0.0118761	-0.0612337	-0.0428788	-0.0178484
Plate01	88	AAA	1	4	16	HMT1	YBR034C	7	18	92	2218	0.8399	13728	7062	14569	7436	7	17	137	3119	0.8695	15251	7886	16203	8310	8	18	119	2841	0.8045	14569	7507	15117	7925	8	17	136	3167	0.8849	14474	7532	15197	7970	-0.00802713	0.00421485	-0.0377758	-0.0373658	-0.0218444	-0.0139647
Plate03	165	AAA	3	7	21	TMS1	YDR105C	13	104	129	3051	0.8559	35433	18538	37274	19201	13	103	175	3926	0.7835	38724	23517	39953	24838	14	104	156	3540	0.8013	37095	20421	38519	21175	14	103	135	3101	0.8221	36014	19465	37131	20440	0.0126767	-0.117065	-0.0257121	-0.0583789	-0.00302037	-0.0847667
Plate03	40	AAA	3	2	16	ATC1	YDR184C	3	114	129	3078	0.8534	30565	14542	31885	14892	3	113	150	3314	0.8174	30000	14629	31495	14879	4	114	134	3174	0.8189	30032	14471	31324	14343	4	113	132	3011	0.8375	29827	14101	31684	14373	-0.0107252	-0.0322923	-0.00332116	0.0153	-0.0134877	-0.0536003
Plate06	159	AAA	6	7	15	SNF6	YHL025W	45	68	71	2400	0.8725	10719	5545	9080	4988	45	67	56	1456	0.9133	NA	4671	NA	4747	46	68	57	1479	0.9095	NA	3708	NA	3842	46	67	60	1456	0.8156	NA	3684	NA	3794	-0.174283	NA	NA	NA	-0.0248681	NA
Plate01	239	AAA	1	10	23	YPC1	YBR183W	19	4	184	4271	0.8421	14992	7830	14985	8110	19	3	198	4533	0.8224	14894	7783	15234	8036	20	4	190	4406	0.8269	14831	7650	15120	7780	20	3	194	4480	0.856	15349	7887	15499	8127	-0.0824588	-0.0448141	-0.0124589	-0.033664	-0.0301473	-0.0318277
Plate02	167	AAA	2	7	23	APA1	YCL050C	13	52	165	3861	0.8397	19711	10592	20144	11067	13	51	172	3971	0.8448	18808	10518	19056	10810	14	52	185	4295	0.8679	19587	11148	19978	11357	14	51	181	4085	0.813	18966	10258	19292	10693	-0.0405879	-0.0973191	-0.0875047	-0.0636711	0.012443	-0.0511776
Plate06	156	AAA	6	7	12	NA	YGR203W	45	74	140	3283	0.877	15891	8593	16700	8799	45	73	137	3333	0.8695	16476	8812	17395	9059	46	74	129	3163	0.8607	15590	8400	16352	8796	46	73	133	3241	0.8266	16077	8685	16981	8945	-0.019027	0.00239169	-0.0503253	-0.0165152	-0.0309346	-0.0113506
Plate04	53	AAA	4	3	5	UBC8	YEL012W	37	40	128	2976	0.8428	9123	4797	9483	4910	37	39	149	3286	0.8154	9877	5056	10290	5136	38	40	137	3123	0.8425	9577	4849	10150	4856	38	39	131	2816	0.8738	8608	4444	9079	4448	-0.0620936	-0.00524249	0.0537466	0.0127381	-0.0582753	-0.0163494
Plate12	356	AAA	12	15	20	SIL1	YOL031C	61	58	168	3563	0.8186	20312	8126	20815	8275	61	57	187	3964	0.7765	21720	8742	22074	8913	62	58	164	3419	0.7968	20509	8294	20876	8417	62	57	168	3418	0.8018	21188	8533	21567	8638	-0.00861941	-0.0146082	-0.0266658	-0.0100535	-0.0176861	-0.0119066
Plate09	358	AAA	9	15	22	XYL2	YLR070C	29	102	171	3530	0.7423	27647	10621	28272	10629	29	101	159	3355	0.8106	26964	10259	27507	10357	30	102	186	3791	0.8144	28450	11135	29140	11217	30	101	169	3575	0.7786	28245	11018	28930	11042	0.003431	-0.00351701	-0.0234434	-0.0131123	-0.00898964	-0.000289686
Plate07	178	AAA	7	8	10	SNA3	YJL151C	47	126	134	3307	0.8517	19614	9714	20490	10124	47	125	139	3320	0.8577	19615	9560	20671	10021	48	126	127	3184	0.8848	19488	9517	20493	9777	48	125	139	3332	0.8627	19863	9747	20784	10063	-0.0566215	-0.0294688	-0.0130922	-0.0256956	-0.035776	-0.0154042
Plate02	359	AAA	2	15	23	NA	YCR043C	29	52	183	4385	0.859	14527	7781	14898	7795	29	51	187	4413	0.8271	14403	7625	14333	8091	30	52	182	4310	0.8594	14940	7877	15032	7917	30	51	188	4414	0.8288	15165	7806	15540	8074	-0.0580605	-0.167802	-0.0641269	-0.0371703	-0.0528899	-0.0394683
Plate06	293	AAA	6	13	5	DAP2	YHR028C	57	88	116	2765	0.8384	12081	6386	12958	6546	57	87	114	2752	0.847	12628	6608	13550	6692	58	88	114	2740	0.8453	12033	6271	12445	6384	58	87	114	2712	0.8347	12274	6466	12983	6546	0.00291036	0.0406486	-0.0243874	0.00584105	-0.035786	-0.0155659
Plate04	77	AAA	4	4	5	TMT1	YER175C	39	40	127	3341	0.8578	14917	7655	15197	8019	39	39	155	3826	0.8023	14590	7739	14744	8141	40	40	128	3168	0.8489	13811	7110	14406	7349	40	39	137	3461	0.7878	15091	7887	15597	8193	-0.0648884	-0.130685	-0.0194431	-0.0572494	-0.00769993	-0.0555556
Plate09	139	AAA	9	6	19	NA	YLR349W	11	108	179	3969	0.677	28108	10885	28538	10799	11	107	193	4075	0.8004	27627	10832	28053	10889	12	108	180	3886	0.7781	28168	10805	28728	10888	12	107	177	3836	0.7712	28029	10765	28382	10705	-0.00375256	-0.0412219	-0.00474524	-0.000282757	-0.0170741	-0.0367965
Plate06	229	AAA	6	10	13	KRE27	YIL027C	51	72	132	3181	0.8174	14624	7673	15611	7893	51	71	140	3356	0.8338	14534	8017	15307	8054	52	72	136	3314	0.8989	14600	7752	15317	7931	52	71	142	3503	0.8666	15056	7985	15804	8222	0.0285665	-0.0289001	-0.00677573	-0.00894507	0.000250591	-0.069496
Plate09	108	AAA	9	5	12	AYT1	YLL063C	9	122	207	4606	0.8216	28258	11072	28718	11071	9	121	214	5004	0.7582	28997	11242	29290	11259	10	122	223	5202	0.8387	29017	11281	29353	11324	10	121	196	4582	0.8002	28977	11130	29257	11077	-0.027907	-0.0206953	-0.0252503	-0.000253973	-0.0321207	-0.0135423
Plate01	59	AAA	1	3	11	RPL19B	YBL027W	5	28	117	2861	0.8725	10299	5382	10840	5770	5	27	71	1719	0.8835	10559	5198	11049	5297	6	28	85	2030	0.8377	10542	5245	11303	5620	6	27	80	2081	0.8897	12762	6340	13218	6661	-0.117119	0.0278178	-0.0173813	-0.0077618	-0.0834684	0.0019769
Plate13	231	AAA	13	10	15	PCL8	YPL219W	83	68	176	4225	0.8154	17254	9101	18179	9293	83	67	112	2794	0.7983	18424	9167	18889	9288	84	68	140	3608	0.8307	17738	8918	18369	9377	84	67	NA	NA	NA	NA	NA	NA	NA	-0.040125	0.0193099	-0.0363647	NA	-0.085459	0.00515881
Plate09	238	AAA	9	10	22	NEJ1	YLR265C	19	102	181	3940	0.7573	27280	10490	27646	10428	19	101	177	3883	0.6995	27202	10428	27573	10491	20	102	179	3823	0.7872	27118	10482	27646	10476	20	101	174	3921	0.7547	27578	10688	28127	10792	-0.005025	-0.0172247	-0.0112368	-0.025062	-0.0126009	-0.00895147
Plate11	134	AAA	11	6	14	MDG1	YNL173C	43	22	205	4882	0.7286	17715	7181	17914	7254	43	21	199	4513	0.7314	17283	6998	17512	7101	44	22	181	4195	0.7794	17352	7040	17648	7136	44	21	178	4104	0.7489	16970	6831	17247	6913	-0.0176992	-0.0202119	-0.0159674	-0.00425733	-0.0142797	-0.0134253
Plate06	280	AAA	6	12	16	SPL2	YHR136C	55	66	168	4240	0.8097	23325	12924	24284	13127	55	65	167	4180	0.847	23671	13272	24880	13205	56	66	164	4304	0.8786	23964	13253	24806	13494	56	65	167	4205	0.8635	24171	13472	24950	13714	-0.00673615	0.0215763	-0.0127939	-0.0264113	-0.0205358	-0.0353706
Plate03	133	AAA	3	6	13	SVF1	YDR346C	11	120	134	3281	0.8928	28972	13936	30654	14358	11	119	139	3325	0.8052	29201	13881	31302	14051	12	120	144	3619	0.853	31299	14806	32393	14926	12	119	148	3495	0.8372	30030	14294	32513	14942	-0.0438321	0.0172662	0.0157727	0.0214066	-0.0636885	-0.0452371
Plate11	237	AAA	11	10	21	NA	YNL320W	51	8	163	3465	0.8104	14739	5900	15158	5996	51	7	126	2677	0.8105	13920	5558	14340	5688	52	8	154	3434	0.7505	15053	6012	15474	6102	52	7	152	3471	0.798	15260	6159	15449	6196	0.00419232	-0.00719375	0.0108155	-0.0128665	-0.010713	-0.0160159
Plate14	238	AAA	14	10	22	NA	YBR020W	83	102	90	2023	0.7276	14570	7197	15240	7280	83	101	97	2146	0.817	15031	7450	15882	7623	84	102	88	1947	0.6211	15203	7377	15988	7600	84	101	101	2149	0.7743	13718	6854	14422	6986	-0.0265187	-0.0243601	-0.0100276	-0.0566427	-0.0304971	-0.0304361
Plate11	39	AAA	11	2	15	IST1	YNL265C	35	20	97	1946	0.7499	12687	4759	13160	4906	35	19	89	1700	0.8103	10359	3902	10557	4113	36	20	173	3841	0.7222	17361	7192	17692	7285	36	19	110	2091	0.7067	13339	5338	13707	5500	0.059313	-0.0651543	-0.0419204	-0.0305182	0.0474154	-0.0238567
Plate10	123	AAA	10	6	3	SPT21	YMR179W	75	44	106	2581	0.8449	5979	2636	6015	2665	75	43	131	3163	0.8908	6243	2998	6356	3125	76	44	87	2118	0.8463	5676	2517	5919	2515	76	43	41	869	0.88	NA	1381	NA	1436	-0.0229755	-0.153282	0.0307877	NA	0.0112155	-0.09981
Plate12	132	AAA	12	6	12	AHC1	YOR023C	43	74	170	3604	0.7006	17049	6694	17351	6710	43	73	150	3021	0.7688	16092	6267	16435	6331	44	74	168	3333	0.7577	16382	6406	16926	6545	44	73	156	3197	0.7581	16178	6304	16766	6407	-0.00260866	-0.00507068	-0.00591729	0.00888408	-0.0202292	-0.0176344
Plate13	152	AAA	13	7	8	NA	YOR246C	77	82	117	278	0.7756	NA	161	NA	134	77	81	195	4727	0.8255	20428	10560	20989	10464	78	82	209	4950	0.8407	21946	11489	22604	11492	78	81	96	219	0.8509	NA	345	NA	280	NA	0.0190349	0.00496353	NA	NA	-0.0289809
Plate04	153	AAA	4	7	9	NA	YEL043W	45	32	110	2755	0.8333	10290	5299	10932	5494	45	31	86	2089	0.8702	9639	4943	10161	5091	46	32	111	2658	0.8485	9732	5051	10254	5297	46	31	114	2774	0.873	10646	5508	11067	5643	-0.0115346	-0.0113868	-0.054027	-0.0314032	-0.0231385	-0.0200118
Plate10	271	AAA	10	12	7	FSH2	YMR222C	87	36	70	1748	0.7867	7906	3710	8180	3845	87	35	76	2059	0.8227	9033	4075	9269	4221	88	36	64	1814	0.8683	10858	5559	11044	5841	88	35	25	317	0.7954	NA	612	NA	561	-0.0434286	0.0237467	-0.142779	NA	-0.0321391	0.0422223
Plate09	247	AAA	9	11	7	NA	YLR169W	21	132	210	4717	0.781	29096	11297	29501	11290	21	131	221	5068	0.8	29202	11392	29624	11441	22	132	204	4555	0.7752	28980	11194	29337	11250	22	131	204	4607	0.7767	28916	11243	29192	11323	-0.0134903	-0.0252331	-0.0171623	-0.0335172	-0.0150073	-0.0208957
Plate03	244	AAA	3	11	4	RAD61	YDR014W	21	138	125	3030	0.812	22474	9185	23823	9660	21	137	134	3182	0.8519	23121	9570	24893	9932	22	138	120	2905	0.8868	23239	9394	24567	9706	22	137	122	2953	0.7828	23521	9541	25152	9731	-0.0654306	-0.018208	-0.0161344	0.0228326	-0.04892	-0.0459271
Plate06	205	AAA	6	9	13	NA	YHL037C	49	72	116	2882	0.8433	14658	7882	15738	8132	49	71	124	3164	0.8298	15923	8542	16548	8559	50	72	108	2682	0.8322	14448	7693	15074	7879	50	71	120	3017	0.8129	15488	8283	16335	8376	-0.00014842	0.00525301	-0.0219183	0.0154467	-0.033287	-0.0196846
Plate12	43	AAA	12	2	19	YVC1	YOR087W	35	60	155	3276	0.8031	19600	7892	19541	7843	35	59	149	3167	0.7318	19194	7570	19004	7592	36	60	136	2722	0.8101	17937	7105	18064	7182	36	59	147	2984	0.8094	18181	7124	18553	7136	-0.0344126	-0.0331806	-0.0349638	0.0143989	-0.0329835	-0.00851016
Plate04	225	AAA	4	10	9	RPL22B	YFL034C-A	51	32	162	4112	0.8682	14170	7365	14901	7466	51	31	170	4125	0.8221	14588	7610	15507	7998	52	32	160	4040	0.8154	14392	7430	15088	7845	52	31	167	4074	0.855	14362	7485	15141	7753	0.00769297	-0.0315589	-0.0443044	-0.0224196	-0.0271772	-0.0317032
Plate10	129	AAA	10	6	9	ECM5	YMR176W	75	32	139	3370	0.855	7679	3575	8168	3730	75	31	131	3172	0.9012	7756	3649	8199	3837	76	32	147	3511	0.8769	7516	3413	7855	3458	76	31	133	3211	0.8624	7750	3706	8133	3899	-0.00486226	-0.0370533	0.0367254	-0.0710586	-0.0257733	-0.0385985
Plate06	186	AAA	6	8	18	CTM1	YHR109W	47	62	160	4064	0.7852	24666	13574	25924	14170	47	61	161	3892	0.8435	24336	13581	25643	14272	48	62	151	3830	0.8907	24153	13594	25223	13969	48	61	157	3811	0.8341	24324	13549	25513	13945	-0.0139483	-0.0402523	-0.0354752	-0.0159012	-0.00498023	-0.025854
Plate02	107	AAA	2	5	11	NA	YCL045C	9	76	185	4309	0.8202	24497	14007	25348	14510	9	75	180	4208	0.8723	24046	13797	24937	14118	10	76	181	4368	0.8207	24707	14085	25374	14579	10	75	180	4402	0.8466	23807	13728	24331	14048	-0.0321135	-0.0222335	-0.0366816	-0.054617	-0.0202101	-0.0291742
Plate11	37	AAA	11	2	13	NA	YNL266W	35	24	153	3338	0.7819	16855	6905	17138	7023	35	23	63	488	0.4994	NA	2183	NA	2098	36	24	167	3644	0.7424	16385	6390	16881	6467	36	23	180	3872	0.7926	17093	7056	17462	7152	-0.0359881	NA	0.0586926	-0.0345988	-0.0311314	NA
Plate10	340	AAA	10	15	4	NA	YML048W-A	93	42	172	4174	0.8571	9038	4504	9331	4581	93	41	148	3665	0.8354	10693	5168	11080	5333	94	42	145	3668	0.8653	9578	4421	9661	4503	94	41	134	3126	0.8068	8737	4112	9279	4301	-0.0760053	-0.0154914	0.000642723	0.000168172	-0.0936265	-0.0258105
Plate04	315	AAA	4	14	3	NA	YFR011C	59	44	124	2871	0.8806	10187	5330	10586	5366	59	43	128	2950	0.8563	11044	5889	11441	5881	60	44	123	2933	0.8671	10642	5550	11227	5672	60	43	101	2241	0.8643	9698	4732	10269	4930	-0.0254511	-0.0411714	-0.0175877	0.0495727	-0.0461504	-0.0704344
Plate03	224	AAA	3	10	8	SWM1	YDR260C	19	130	125	3110	0.8977	27074	11871	29060	12567	19	129	130	3162	0.8446	26352	11793	28225	12274	20	130	135	3292	0.7984	25544	11333	26993	11538	20	129	144	3547	0.8886	27879	12367	29270	12569	0.00197275	-0.025176	-0.0382913	0.0148131	-0.00882409	-0.0495993
Plate08	292	AAA	8	13	4	PHD1	YKL043W	25	90	187	3868	0.8075	28517	12067	29405	12044	25	89	205	4225	0.8504	28932	12319	29731	12453	26	90	205	4358	0.8269	29208	12540	29705	12622	26	89	201	4194	0.8465	29054	12327	29903	12515	0.0119518	-0.0122394	-0.0305877	-0.00907312	-0.0139173	-0.0160019
Plate09	68	AAA	9	3	20	NA	YLL047W	5	106	164	3450	0.8186	24924	9518	25317	9526	5	105	154	3203	0.7792	24334	9300	24697	9271	6	106	160	3474	0.7732	25102	9479	25831	9556	6	105	164	3485	0.8064	25088	9526	25574	9611	-0.0185578	-0.0204154	0.00821725	-0.0149111	-0.0201453	-0.0259507
Plate07	237	AAA	7	10	21	RAD7	YJR052W	51	104	141	3300	0.8206	24929	12955	26015	13182	51	103	142	3260	0.8271	24321	12686	25684	12912	52	104	140	3290	0.8055	24285	12594	25526	12925	52	103	140	3273	0.8947	24381	12752	25459	12649	0.0100248	0.0144342	0.00300636	0.0253262	-0.0121173	-0.0256784
Plate06	305	AAA	6	13	17	YSC83	YHR017W	57	64	29	579	0.6949	NA	6052	NA	5877	57	63	40	981	0.8332	NA	8525	NA	8953	58	64	27	313	0.7228	NA	1831	NA	1643	58	63	67	1742	0.9146	16126	8680	17041	9072	NA	NA	NA	-0.0306043	NA	NA
Plate13	147	AAA	13	7	3	PDE2	YOR360C	77	92	120	2879	0.8404	16427	8142	17189	8483	77	91	123	3100	0.839	18112	9107	18112	9344	78	92	130	3217	0.8593	18275	9327	18324	9455	78	91	124	3081	0.8249	17844	9339	17331	9451	-0.0027449	-0.0531876	-0.0513323	-0.136156	-0.00997042	-0.0120719
Plate10	40	AAA	10	2	16	MIH1	YMR036C	67	18	167	3860	0.7784	6545	2963	6764	3005	67	17	162	3779	0.8321	6587	3011	6679	3048	68	18	172	3883	0.8205	6283	2905	6492	2918	68	17	149	3494	0.816	6110	2792	6183	2733	-0.00482375	-0.0434159	-0.028354	-0.0148042	-0.0120594	-0.0243122
Plate04	222	AAA	4	10	6	FLO8	YER109C	51	38	148	3659	0.8096	13173	6719	13904	7138	51	37	153	3977	0.8585	13681	7156	14081	7354	52	38	165	4098	0.8001	13659	7194	14076	7579	52	37	146	3672	0.843	13780	7113	14414	7356	-0.0301015	-0.0538686	-0.0971525	-0.0199798	-0.00207773	-0.0371226
Plate03	246	AAA	3	11	6	SNQ2	YDR011W	21	134	117	2841	0.8846	23100	9700	24485	9939	21	133	140	3311	0.8599	26471	11168	28279	11542	22	134	126	3021	0.9034	23544	9857	25011	10273	22	133	132	3097	0.8634	24295	10168	25706	10471	-0.048374	0.0449315	-0.0470938	-0.0192702	-0.0628072	0.0188937
Plate09	131	AAA	9	6	11	BUD8	YLR353W	11	124	187	4100	0.7553	27475	10579	27805	10669	11	123	187	4307	0.755	27891	10796	28274	10900	12	124	193	4216	0.7389	27922	10827	28448	10946	12	123	193	4314	0.7968	27623	10612	28033	10674	-0.0271556	-0.0305899	-0.0269239	-0.0152868	-0.0131564	-0.0177499
Plate02	207	AAA	2	9	15	CIT2	YCR005C	17	68	135	3220	0.8363	18928	10225	19904	10332	17	67	143	3316	0.8221	17314	9447	18337	9456	18	68	129	3156	0.8839	18175	9936	18856	9909	18	67	131	3253	0.8531	18020	9843	18790	9836	0.0305153	0.0172613	-4.35e-05	0.0041133	-0.00372431	-0.0371362
Plate04	177	AAA	4	8	9	NA	YFL019C	47	32	174	4448	0.8081	15896	8246	16461	8620	47	31	173	4273	0.8327	16321	8404	16990	8779	48	32	179	4489	0.8686	15968	8414	16410	8859	48	31	172	4391	0.8374	16634	8664	16907	9077	-0.0502538	-0.0297828	-0.0936059	-0.0843001	-0.0216389	-0.0104318
Plate04	196	AAA	4	9	4	RSM28	YDR494W	49	42	122	2902	0.8154	11716	6100	12493	6125	49	41	134	3269	0.8419	12226	6190	12976	6223	50	42	131	3039	0.8445	10873	5684	11609	5811	50	41	125	2952	0.8687	11341	5888	12151	6025	0.0301802	0.0632831	-0.00280207	0.0128303	-0.0346492	0.00648643
Plate09	141	AAA	9	6	21	DIC1	YLR348C	11	104	154	3300	0.7293	25728	9770	26307	9905	11	103	157	3407	0.7867	26178	9981	26772	10110	12	104	178	3834	0.7943	26983	10464	27480	10488	12	103	143	3029	0.6466	25476	9746	26006	9825	-0.0118642	-0.0125139	-0.0220166	-0.0186851	-0.00640502	-0.00855111
Plate06	173	AAA	6	8	5	BAR1	YIL015W	47	88	123	3071	0.8079	13939	7342	14755	7671	47	87	122	2957	0.8127	13205	6935	13720	7261	48	88	129	3116	0.8395	13328	6987	14198	7261	48	87	131	3099	0.8452	12798	6889	13279	6995	-0.0175114	-0.052172	-0.000320285	-0.0505796	-0.0112891	-0.0143848
Plate06	111	AAA	6	5	15	NA	YHL012W	41	68	119	2916	0.8476	17488	9516	18701	9911	41	67	117	2911	0.8116	18153	9762	19002	9885	42	68	116	2867	0.8183	16910	9198	17973	9694	42	67	111	2856	0.8589	17801	9657	18936	9905	-0.0123243	0.0153575	-0.0416246	0.00732807	-0.0280631	-0.00736106
Plate12	324	AAA	12	14	12	ATX2	YOR079C	59	74	154	3374	0.8497	21995	8806	22340	9052	59	73	164	3580	0.8168	22498	9194	22645	9348	60	74	171	3798	0.7916	22825	9231	23222	9388	60	73	151	3312	0.8359	22407	9262	22681	9428	-0.0158982	-0.0360724	-0.00131923	-0.0445165	-0.00202831	-0.0237315
Plate14	308	AAA	14	13	20	NA	YPR063C	89	106	136	3256	0.8502	24625	12934	24902	13021	89	105	155	3618	0.8407	23300	12166	24118	12431	90	106	148	3564	0.8948	23566	12542	24089	12745	90	105	141	3302	0.8549	24273	12636	24710	12785	-0.0350095	-0.0253837	-0.0597654	-0.0235227	-0.0208302	-0.025443
Plate03	259	AAA	3	11	19	NA	YDR133C	21	108	189	4366	0.8365	35407	18879	36606	19545	21	107	188	4377	0.8564	36280	19778	37393	20329	22	108	182	4239	0.8932	36177	19583	37196	20444	22	107	193	4401	0.8605	35385	19220	36812	18976	-0.0391677	-0.0397075	-0.0553147	0.00156036	-0.0234719	-0.0272117
Plate13	61	AAA	13	3	13	NA	YOR318C	69	72	120	2784	0.8753	11168	5480	11744	5651	69	71	94	2213	0.8327	11567	5396	12371	5712	70	72	175	4382	0.8473	16580	8246	17285	8347	70	71	137	3269	0.9005	14019	6948	14316	7028	-0.0452358	0.0211474	0.027623	-0.0307293	-0.0707365	0.0042226
Plate08	117	AAA	8	5	21	NA	YKL075C	9	56	192	4192	0.8094	25529	10475	26043	10669	9	55	166	3522	0.78	24841	10119	25199	10046	10	56	172	3685	0.7599	25119	10259	25439	10354	10	55	171	3757	0.8131	25596	10543	25786	10629	-0.0272147	-0.00120397	-0.0255596	-0.0380981	-0.0141384	-0.0136783
Plate12	133	AAA	12	6	13	NA	YOR121C	43	72	50	371	0.5221	NA	1740	NA	1672	43	71	116	2546	0.7999	18167	7168	18501	7212	44	72	180	358	0.6437	NA	1014	NA	907	44	71	58	598	0.6904	NA	3186	NA	3120	NA	-0.0043187	NA	NA	NA	-0.0178261
Plate14	162	AAA	14	7	18	DSS4	YPR017C	77	110	144	3720	0.8165	27419	14524	27423	14850	77	109	150	3656	0.8418	27093	14631	27102	14843	78	110	135	3488	0.8803	28739	15474	28534	15263	78	109	146	3540	0.8822	27433	15097	27093	14827	-0.049679	-0.0680597	-0.0203475	-0.067221	-0.00485831	-0.0333299
Plate03	286	AAA	3	12	22	PEX10	YDR265W	23	102	124	2880	0.8563	33196	17007	34611	17929	23	101	148	3438	0.8306	34563	18175	36388	19319	24	102	127	2983	0.8778	34352	17797	35824	18678	24	101	140	3222	0.8748	34436	18243	35937	19050	-0.0542128	-0.0383599	-0.0326933	-0.0471406	-0.031407	-0.0278495
Plate10	235	AAA	10	10	19	ICY1	YMR195W	83	12	184	4838	0.8253	10656	5110	11118	5210	83	11	116	166	0.6251	NA	286	NA	226	84	12	179	4743	0.8298	11208	5544	11695	5519	84	11	183	4861	0.8452	11413	5531	11727	5489	0.0211425	NA	0.0217152	0.0332521	-0.0156713	NA
Plate07	284	AAA	7	12	20	NA	YJL171C	55	106	178	4313	0.8084	27745	14806	28766	15079	55	105	189	4548	0.82	27278	14635	28449	14932	56	106	182	4432	0.8269	27090	14589	28389	14607	56	105	182	4424	0.8303	27749	15062	28715	14913	0.0104747	0.00419849	0.0277988	0.0211631	-0.00660542	-0.0195858
Plate02	77	AAA	2	4	5	NA	YDL109C	7	88	143	3259	0.8456	30935	18651	32382	19610	7	87	151	3533	0.798	32858	21026	33693	21347	8	88	106	2516	0.8553	26116	14098	27680	14741	8	87	167	3864	0.8329	30998	18729	32274	19050	-0.0351485	-0.0812135	0.0864481	-0.00302533	-0.0338501	-0.09636
Plate02	63	AAA	2	3	15	BIK1	YCL029C	5	68	173	4070	0.8364	28238	16370	28334	15968	5	67	167	3954	0.8696	28791	16759	28740	16877	6	68	166	3920	0.8356	24489	14318	25051	14594	6	67	157	3695	0.8008	24015	13841	25259	14202	0.0193347	-0.0301042	-0.0582761	-0.00968725	-0.00461384	-0.0052921
Plate13	31	AAA	13	2	7	REV3	YPL167C	67	84	116	2713	0.8282	11927	5622	12524	5804	67	83	106	2501	0.8286	13371	6344	13679	6554	68	84	119	2751	0.8409	12199	6110	12777	6295	68	83	149	3539	0.8728	14371	7166	14987	7539	0.0188802	-0.00731165	-0.0587246	-0.0545009	-0.00339476	0.0104662
Plate04	85	AAA	4	4	13	BCK2	YER167W	39	24	141	3483	0.8546	11848	6162	12428	6199	39	23	145	3461	0.8544	12445	6275	13135	6370	40	24	145	3625	0.8658	12155	6373	12641	6306	40	23	145	3498	0.8635	12031	6271	12755	6531	0.00549008	0.0480155	0.0061266	-0.0304531	-0.0327782	0.0128552
Plate07	259	AAA	7	11	19	NA	YJL037W	53	108	144	3311	0.7908	23341	12028	24503	12146	53	107	159	3715	0.8402	25575	13497	26922	14122	54	108	142	3320	0.8653	23646	12165	24954	12596	54	107	147	3441	0.8201	24006	12367	25455	12589	0.0123283	-0.0183266	-0.00254725	0.0309399	-0.025051	-0.022316
Plate07	113	AAA	7	5	17	MND2	YIR025W	41	112	134	3018	0.8322	22332	11399	23903	11751	41	111	131	3105	0.8151	23012	11743	24365	12165	42	112	133	3157	0.8842	22546	11417	23711	11648	42	111	135	3128	0.816	23110	11815	24537	11947	0.0123447	0.00108236	0.0099441	0.0350407	-0.028682	-0.0177203
Plate06	298	AAA	6	13	10	SOL4	YGR248W	57	78	117	2794	0.864	13809	7326	14659	7445	57	77	133	3093	0.8857	14371	7767	15218	7805	58	78	122	2930	0.8438	14915	7809	15876	7875	58	77	134	3283	0.8817	15356	8252	16338	8375	0.0136805	0.00541698	0.0571539	0.0158882	-0.0224109	-0.0428336
Plate04	204	AAA	4	9	12	PAC11	YDR488C	49	26	139	3318	0.8519	12405	6399	12947	6536	49	25	131	3247	0.8282	13020	6777	13476	6845	50	26	143	3301	0.8393	12463	6477	12983	6481	50	25	130	3275	0.8616	12942	6669	13614	6909	-0.00962772	-0.016442	0.00643437	-0.0147145	-0.0197961	-0.0313719
Plate14	127	AAA	14	6	7	NA	YIL151C	75	132	128	2964	0.8347	18639	9561	19254	9510	75	131	122	2919	0.8659	21283	10957	22521	11140	76	132	137	3177	0.88	20165	10281	21671	10265	76	131	128	3029	0.8352	19465	9815	20346	9857	-0.0227377	0.0106037	0.0587651	0.014736	-0.0434622	-0.0250122
Plate04	68	AAA	4	3	20	DYN2	YDR424C	37	10	173	3916	0.8212	20933	11002	21993	11277	37	9	166	4101	0.8018	22316	11550	23110	11683	38	10	175	4096	0.8515	20465	10836	21342	11130	38	9	180	4255	0.9089	21788	11264	22712	11630	-0.00546842	0.017383	-0.0310793	-0.00175496	-0.0338735	-0.0103278
Plate09	134	AAA	9	6	14	NA	YLR241W	11	118	191	4363	0.7446	28142	10872	28650	10792	11	117	196	4397	0.7641	27980	10871	28332	10878	12	118	184	4070	0.8096	27460	10427	28080	10392	12	117	192	4258	0.7721	27984	10909	28506	10976	0.00311583	-0.0247161	0.0235255	-0.0275256	-0.0136049	-0.0222912
Plate09	119	AAA	9	5	23	ICT1	YLR099C	9	100	148	3153	0.812	25632	9742	26086	9722	9	99	169	3725	0.7802	26522	10146	26948	10197	10	100	177	3789	0.8135	26208	10073	26748	10120	10	99	164	3469	0.7765	25810	9897	26174	9874	0.000216024	-0.0140078	-0.0152255	-0.0154531	-0.00829601	-0.0106578
Plate13	76	AAA	13	4	4	NA	YPL073C	71	90	113	2775	0.8867	17039	8208	18144	8604	71	89	155	3847	0.8419	17520	8872	18250	8963	72	90	138	3367	0.8737	16565	8517	16972	8582	72	89	130	3151	0.8463	14499	7357	15264	7477	0.0610878	0.0147492	-0.0379154	-0.0151905	0.0351778	-0.0275182
Plate13	101	AAA	13	5	5	PYK2	YOR347C	73	88	94	2425	0.8692	18021	8680	18596	8928	73	87	58	1491	0.899	NA	10170	NA	10670	74	88	166	4170	0.8283	16525	8778	17029	8948	74	87	49	1090	0.8996	NA	5009	NA	5202	0.0488329	NA	-0.0891769	NA	0.0452786	NA
Plate01	266	AAA	1	12	2	YMC2	YBR104W	23	46	161	3687	0.8304	23479	12334	23916	12435	23	45	134	3047	0.831	21422	11734	22497	12387	24	46	152	3397	0.871	23182	12523	24271	12633	24	45	94	2289	0.8574	21035	11635	22191	12118	0.0577724	-0.0312154	0.0592307	-0.0227363	0.0336098	-0.0391589
Plate06	226	AAA	6	10	10	ARP1	YHR129C	51	78	118	3124	0.8701	17384	9445	17976	9605	51	77	108	2846	0.8729	17100	9298	17775	9538	52	78	117	3154	0.8112	19605	10601	19971	10857	52	77	100	2640	0.8694	17194	9304	17844	9709	-0.0286583	-0.0359571	-0.0390747	-0.0546102	-0.0266534	-0.0296835
Plate06	51	AAA	6	3	3	SHU1	YHL006C	37	92	119	2929	0.8454	12314	6482	12526	6681	37	91	123	2906	0.8531	12132	6554	12646	6878	38	92	119	2971	0.8742	12898	6688	13119	6974	38	91	128	3210	0.8205	13395	6931	13775	7262	-0.076511	-0.101685	-0.0648621	-0.0463017	-0.0272838	-0.0649796
Plate06	35	AAA	6	2	11	FMO1	YHR176W	35	76	160	3981	0.8214	22182	12150	23025	12470	35	75	157	3832	0.886	22526	12384	23673	12656	36	76	153	3844	0.8194	21779	12113	22387	12294	36	75	152	3811	0.8069	21899	12133	22592	12538	-0.0160019	0.00534299	-0.038686	-0.0520854	-0.0101045	-0.0135144
Plate07	160	AAA	7	7	16	SGA1	YIL099W	45	114	170	4176	0.8723	25934	13807	26955	14355	45	113	171	4170	0.8315	26429	14058	27452	14270	46	114	168	4185	0.8939	26682	14234	27665	14775	46	113	181	4309	0.8536	26958	14299	28205	14638	-0.0364712	0.00104981	-0.029011	0.014433	-0.0283171	-0.0203097
Plate14	91	AAA	14	4	19	NA	YGR273C	71	108	121	2876	0.8435	18539	9326	19210	9360	71	107	124	3008	0.8893	18215	9307	19130	9580	72	108	121	2946	0.8343	18995	9663	20172	9965	72	107	123	3013	0.811	19715	9950	20497	9996	-0.00499732	-0.0425484	-0.0131282	0.00751321	-0.0177921	-0.0418848
Plate01	79	AAA	1	4	7	TBS1	YBR150C	7	36	110	2557	0.8523	12666	6403	13283	6771	7	35	103	2373	0.8649	12557	6317	13276	6637	8	36	148	3274	0.8699	12027	6166	12822	6377	8	35	145	3222	0.8673	12550	6384	13349	6669	-0.0224539	0.00382962	0.00471992	0.00570186	-0.00892746	-0.00340491
Plate01	317	AAA	1	14	5	PCS60	YBR222C	27	40	174	4020	0.8828	20616	11162	21219	11522	27	39	182	4125	0.8657	21396	11691	21675	12253	28	40	184	4235	0.8142	21424	11499	22071	11761	28	39	184	4221	0.8617	22038	11672	22620	11898	-0.0236746	-0.073858	0.00919558	0.0313999	-0.0298933	-0.0360348
Plate04	185	AAA	4	8	17	NA	YFL013W-A	47	16	125	2915	0.8676	10578	5586	11123	5769	47	15	92	2046	0.8723	8811	4336	9323	4323	48	16	97	2300	0.8056	9311	4778	9890	4842	48	15	118	2727	0.8024	9781	5120	10138	5244	-0.0552827	0.0920504	0.019562	-0.0565597	-0.0579389	0.0333505
Plate10	292	AAA	10	13	4	NA	YML033W	89	42	94	2627	0.843	12729	5930	13107	6156	89	41	131	3481	0.7868	11237	5499	11180	5649	90	42	153	4032	0.8544	11623	5914	11166	5617	90	41	174	4258	0.8651	10340	5035	10565	5033	0.050794	-0.0789954	-0.0732929	-0.0110537	0.05142	-0.0351296
Plate04	107	AAA	4	5	11	NA	YEL023C	41	28	145	3732	0.8778	15996	8367	16730	8668	41	27	152	3781	0.892	16002	8227	16792	8477	42	28	153	3811	0.8499	15583	8139	16212	8388	42	27	161	4058	0.8206	16466	8545	17319	8825	-0.0343588	0.00267816	-0.0338922	-0.00904692	-0.0333678	-0.00867247
Plate03	140	AAA	3	6	20	SPR28	YDR218C	11	106	161	3833	0.843	35829	19441	36935	19972	11	105	160	3692	0.8198	36290	19872	37676	20010	12	106	163	3808	0.8534	36879	20471	38156	21566	12	105	135	3038	0.8761	35152	18436	36948	19748	-0.0446105	-0.00951339	-0.0619755	-0.0324263	-0.0323432	-0.0316408
Plate07	103	AAA	7	5	7	DAL7	YIR031C	41	132	158	3933	0.8351	21945	10995	22876	11542	41	131	172	4236	0.8526	22497	11458	23565	11691	42	132	162	3987	0.83	22199	11231	22569	11321	42	131	176	4192	0.8876	21967	11112	22820	11214	-0.0378198	-0.00479465	-0.0361369	-0.00616079	-0.0112913	-0.0232936
Plate06	330	AAA	6	14	18	NA	YHR151C	59	62	125	3081	0.8098	17913	9733	18889	9829	59	61	117	2741	0.8635	16457	8869	17005	8901	60	62	132	3105	0.8474	17699	9639	18616	9505	60	61	129	3001	0.8614	17523	9407	18476	9375	0.0142012	-0.00759519	0.0384822	0.0460943	-0.0232246	-0.0219941
Plate03	117	AAA	3	5	21	DNF2	YDR093W	9	104	143	3262	0.7952	31348	15648	32410	15646	9	103	159	3582	0.8306	33512	17194	35132	17237	10	104	141	3104	0.8242	30336	14850	31851	14843	10	103	94	2149	0.8498	32120	15402	33972	16013	-0.0329369	0.0142262	-0.00919032	0.0291254	-0.0466734	-0.0257183
Plate04	152	AAA	4	7	8	JIP4	YDR475C	45	34	154	3796	0.8441	14603	7695	15312	8075	45	33	155	4008	0.8503	14875	7715	15320	8108	46	34	148	3825	0.8807	14946	7699	15540	8029	46	33	160	4073	0.8785	14921	7680	15638	8252	-0.0637113	-0.0687329	-0.0339311	-0.0635764	-0.0461018	-0.0229722
Plate08	348	AAA	8	15	12	MDM35	YKL053C-A	29	74	122	NA	NA	6929	1760	6708	1568	29	73	NA	NA	NA	NA	NA	NA	NA	30	74	51	456	0.8039	NA	4457	NA	4528	30	73	NA	NA	NA	NA	NA	NA	NA	0.0173061	NA	NA	NA	-0.0138289	NA
Plate08	156	AAA	8	7	12	HOM6	YJR139C	13	74	127	NA	NA	6558	1635	6271	1410	13	73	70	1330	0.6917	NA	7749	NA	8120	14	74	165	NA	NA	6700	1711	6271	1481	14	73	136	NA	NA	5774	1066	5698	1004	-0.0218472	NA	-0.0648357	0.0477086	-0.0490607	NA
Plate10	124	AAA	10	6	4	NA	YMR085W	75	42	113	3004	0.8441	15147	7998	15586	8200	75	41	41	1088	0.8628	NA	2947	NA	3138	76	42	197	4856	0.8732	9461	4527	9587	4652	76	41	138	3753	0.8352	12720	5960	12561	6126	-0.066501	NA	-0.0549652	-0.00828833	-0.0921602	NA
Plate03	47	AAA	3	2	23	CPR5	YDR304C	3	100	155	3257	0.8011	33870	17301	35736	17295	3	99	142	2916	0.7755	32821	16300	34593	16277	4	100	154	3302	0.8004	31467	16154	32342	15935	4	99	166	3430	0.8039	33263	16772	34837	16913	0.0422434	0.0453668	-0.0560417	0.0183795	-0.0128838	-0.0069426
Plate03	147	AAA	3	7	3	RBF64	YDR117C	13	140	166	4011	0.8725	26136	11464	26734	11706	13	139	151	3766	0.834	26582	11776	27443	12120	14	140	162	4012	0.8594	26365	11544	27313	11924	14	139	164	3953	0.8669	26494	11543	27399	11794	-0.0713628	-0.0621344	-0.0529677	-0.0353934	-0.0327917	-0.0325564
Plate03	112	AAA	3	5	16	RTN2	YDL204W	9	114	125	3071	0.8677	30715	14734	32587	15188	9	113	125	3051	0.8506	31174	14891	32598	14997	10	114	127	2992	0.8755	28830	13872	30627	14335	10	113	117	2825	0.8839	30873	14832	31980	14982	0.00833959	0.0223066	-0.0437312	-0.0116533	-0.0188102	-0.00343114
Plate09	284	AAA	9	12	20	NA	YLR283W	23	106	167	3622	0.7529	26724	10279	27257	10296	23	105	174	3847	0.7527	26972	10383	27548	10500	24	106	182	3894	0.7718	27174	10458	27556	10551	24	105	167	3708	0.7365	26964	10310	27248	10373	-0.00954707	-0.019775	-0.0258849	-0.0201171	-0.0166287	-0.0160953
Plate10	308	AAA	10	13	20	UNG1	YML021C	89	10	109	2719	0.8409	9349	3925	9530	4035	89	9	126	3070	0.8354	7711	3752	7789	3809	90	10	119	2991	0.8229	9500	4691	9766	4718	90	9	86	1877	0.8331	5224	2451	5595	2549	0.127123	-0.106248	-0.0453899	-0.0735729	0.145696	-0.0854626
Plate04	198	AAA	4	9	6	IZH1	YDR492W	49	38	165	4207	0.7789	15490	7944	15715	8316	49	37	161	4201	0.8799	15008	7822	15502	8325	50	38	159	3976	0.8744	14445	7465	14768	7788	50	37	151	3883	0.8702	14752	7735	14867	8101	-0.067328	-0.0888827	-0.0653797	-0.111515	-0.00587865	-0.0297308
Plate04	190	AAA	4	8	22	FMP29	YER080W	47	6	175	4249	0.8456	21291	10991	21935	10823	47	5	176	4064	0.8482	19908	10283	20813	10258	48	6	166	3828	0.8478	19481	10137	20780	10370	48	5	177	4041	0.8474	20645	10994	21497	10793	0.0487977	0.0475225	0.0298152	0.0230746	-0.00777415	-0.0102136
Plate03	27	AAA	3	2	3	OMS1	YDR316W	3	140	141	3449	0.8444	31100	15243	32478	15616	3	139	136	3416	0.8364	31727	15276	32932	15748	4	140	139	3456	0.7957	30802	15033	31600	15776	4	139	134	3289	0.7844	30837	15092	32155	15436	-0.0270753	-0.0104733	-0.0880234	-0.0331734	-0.0328817	0.00093087
Plate10	319	AAA	10	14	7	YHM2	YMR241W	91	36	159	4169	0.8684	11995	5945	12291	6137	91	35	137	3328	0.8822	10356	4980	10941	5209	92	36	133	3523	0.8269	10992	5182	11088	5228	92	35	138	3450	0.8007	8110	3867	8061	3858	-0.044216	-0.0033394	0.0123425	-0.0705473	-0.0423418	-0.0238977
Plate09	186	AAA	9	8	18	NDL1	YLR254C	15	110	165	3813	0.767	27815	10535	28332	10522	15	109	174	3944	0.7622	27887	10726	28483	10596	16	110	165	3719	0.7825	27550	10705	28045	10687	16	109	197	4401	0.7879	28128	11000	28485	10951	0.0203823	0.0190234	-0.0162806	-0.0255571	0.0113017	-0.00913479
Plate07	334	AAA	7	14	22	SWE1	YJL187C	59	102	137	3099	0.8592	24086	12679	24554	12678	59	101	156	3608	0.83	27402	14505	28250	14726	60	102	118	2711	0.8214	22414	11660	23474	11894	60	101	144	3245	0.7633	26610	13747	27816	14147	-0.0372257	0.00968946	-0.0324702	0.0334934	-0.0407306	-0.000974563
Plate10	197	AAA	10	9	5	NA	YML117W-A	81	40	139	3244	0.8362	6554	2995	6838	2988	81	39	158	3698	0.796	7927	3688	8367	3809	82	40	157	3705	0.8212	8057	3791	8498	3751	82	39	47	1066	0.8486	NA	2506	NA	2480	0.0195601	0.00404859	0.0486173	NA	-0.0246581	-0.0199845
Plate09	350	AAA	9	15	14	SIC1	YLR079W	29	118	57	1065	0.7619	NA	6964	NA	7257	29	117	103	2017	0.7575	21584	8126	22557	8380	30	118	48	671	0.6695	NA	6016	NA	6094	30	117	106	2070	0.7296	22929	8487	23797	8669	NA	-0.0256019	NA	0.0120893	NA	-0.0311206
Plate03	142	AAA	3	6	22	RAD9	YDR217C	11	102	82	2021	0.9096	32650	16197	34575	17047	11	101	124	2871	0.8181	33250	16956	35070	17307	12	102	142	3176	0.8343	32510	16789	34206	17240	12	101	102	2407	0.7927	32688	16271	34733	16874	-0.00375908	0.0067561	-0.0352683	0.015266	-0.009687	-0.0252545
Plate09	262	AAA	9	11	22	NA	YLR040C	21	102	180	3933	0.8215	25775	9925	25973	9922	21	101	153	3196	0.7433	23992	8974	24248	8979	22	102	166	3596	0.8139	25112	9538	25387	9594	22	101	164	3618	0.8337	26243	10068	26604	10112	-0.0338512	-0.00587829	-0.0238511	-0.0224554	-0.0248015	8.1e-05
Plate04	62	AAA	4	3	14	NA	YDR428C	37	22	170	4249	0.7953	18445	9656	18946	9838	37	21	167	4220	0.8632	18551	9696	18830	9706	38	22	163	4163	0.8625	19528	10095	19630	10276	38	21	165	4243	0.8444	20374	10590	21041	11187	-0.0313304	-0.021209	-0.04094	-0.0591905	-0.0312317	-0.0288113
Plate06	333	AAA	6	14	21	DFG10	YIL049W	59	56	152	3539	0.8409	20857	11352	21565	11755	59	55	136	3213	0.7805	20054	11023	20776	10959	60	56	140	3236	0.8487	19815	10800	20393	10664	60	55	148	3521	0.8571	20650	11393	21538	11258	-0.0331188	0.00754442	0.0171572	0.0246276	-0.00816954	-0.0262347
Plate13	154	AAA	13	7	10	DGA1	YOR245C	77	78	146	3567	0.8507	17535	8541	18599	8847	77	77	132	3096	0.8163	13858	6772	14608	7130	78	78	157	3784	0.8819	16697	8311	17878	8550	78	77	114	2972	0.7614	17341	9228	17493	9483	0.0614057	-0.0189453	0.0469439	-0.126464	0.0252921	-0.0223725
Plate01	56	AAA	1	3	8	DEP1	YAL013W	5	34	107	2298	0.8213	7432	3708	7929	3789	5	33	99	2196	0.8392	7078	3413	7660	3519	6	34	74	1737	0.823	7270	3401	7623	3447	6	33	78	1671	0.8535	6860	3168	7326	3326	-0.0296962	0.016744	0.0371196	0.0240267	-0.0692553	-0.0305028
Plate13	334	AAA	13	14	22	MKK2	YPL140C	91	54	141	3594	0.8292	16846	8560	17213	8736	91	53	121	3039	0.8302	15581	7602	16115	7681	92	54	158	3766	0.8423	16770	8588	17844	9058	92	53	139	3171	0.9009	15204	7504	16283	7935	-0.0402915	0.0320798	-0.0339999	0.00418013	-0.0391028	0.00171752
Plate12	224	AAA	12	10	8	NA	YOR050C	51	82	172	3799	0.7951	20730	8293	21005	8366	51	81	188	4464	0.8552	21975	8966	22103	9122	52	82	186	4030	0.8005	21316	8546	21653	8676	52	81	177	3972	0.8515	21295	8551	21779	8659	-0.00900063	-0.0428102	-0.0095877	0.00210309	-0.0136743	-0.0273578
Plate09	111	AAA	9	5	15	NA	YLR108C	9	116	175	3850	0.7897	27218	10477	27764	10475	9	115	186	4115	0.8028	27720	10686	28192	10606	10	116	172	3793	0.6974	27400	10509	27808	10432	10	115	174	3912	0.7937	27603	10658	28187	10708	-0.00458036	0.00202843	0.0034115	-0.0112111	-0.0144027	-0.0132395
Plate01	303	AAA	1	13	15	ECM21	YBL101C	25	20	164	4258	0.8768	20820	10865	21189	11273	25	19	122	2993	0.839	17111	9343	17710	9753	26	20	166	4258	0.8233	20227	10608	20211	10876	26	19	166	4167	0.8404	19519	10436	19596	10766	0.00360888	-0.0761207	-0.0206178	-0.0543483	0.0217883	-0.0712901
Plate12	303	AAA	12	13	15	NA	YOL118C	57	68	175	3846	0.8366	22024	8992	22515	9095	57	67	162	3547	0.8208	21314	8509	21868	8710	58	68	171	3962	0.8061	22920	9427	23025	9594	58	67	181	4073	0.8298	22374	9003	22861	9152	-0.00970634	0.000798965	-0.0427829	0.00642728	-0.027723	-0.00518203
Plate03	316	AAA	3	14	4	DPL1	YDR294C	27	138	169	4269	0.8691	23482	9837	24063	9815	27	137	138	3303	0.8475	22288	9154	23417	9254	28	138	184	4565	0.8356	24483	10040	25011	10086	28	137	162	3850	0.8385	24558	10027	25011	10076	-0.0653338	-0.0480182	-0.0268068	-0.0257107	-0.0499062	-0.0595798
Plate09	205	AAA	9	9	13	NA	YLR137W	17	120	220	4895	0.7718	28319	10921	28822	11070	17	119	213	4981	0.7444	28810	11166	29314	11196	18	120	223	4831	0.7781	28109	10841	28448	10926	18	119	218	4941	0.7258	28490	11044	29040	11155	-0.0222638	-0.0118135	-0.0244424	-0.0211534	-0.010153	-0.0141493
Plate07	223	AAA	7	10	7	NTA1	YJR062C	51	132	119	2942	0.8086	18076	8631	19046	8763	51	131	122	3012	0.866	18798	9005	20041	9495	52	132	127	3082	0.8846	18219	8722	19146	9008	52	131	129	3038	0.872	18070	8708	19417	9155	0.0027076	-0.0134063	-0.0229921	-0.0200428	-0.0173356	-0.00810565
Plate06	239	AAA	6	10	23	VID28	YIL017C	51	52	154	3284	0.7658	18193	10110	19183	10274	51	51	142	3102	0.7681	18369	9805	18596	9660	52	52	141	3023	0.7839	18431	10060	19237	10070	52	51	156	3492	0.8097	20141	10892	20236	10523	-0.0235508	0.0145597	0.0083313	0.0238851	-0.0525333	0.00431696
Plate06	134	AAA	6	6	14	HXT1	YHR094C	43	70	163	4047	0.843	21063	11550	22125	12139	43	69	157	3945	0.855	22721	12516	23212	12819	44	70	153	3849	0.8541	20322	11143	21324	11665	44	69	168	4149	0.8172	20430	11222	21463	11490	-0.0388981	-0.0419205	-0.0394229	-0.00877871	-0.0174234	-0.0153135
Plate13	248	AAA	13	11	8	NA	YOR283W	85	82	184	4490	0.8038	20706	10888	21515	11226	85	81	NA	NA	NA	NA	NA	NA	NA	86	82	147	3578	0.8326	19882	9940	20802	10332	86	81	165	4031	0.8234	18516	9532	19069	9694	-0.0385816	NA	0.0225776	-0.0240967	-0.049894	NA
Plate12	88	AAA	12	4	16	TIR4	YOR009W	39	66	192	4365	0.7864	20518	8189	20815	8349	39	65	193	4411	0.8298	20626	8239	20882	8384	40	66	190	4499	0.8075	20766	8371	20997	8493	40	65	201	4642	0.7699	20952	8406	21020	8513	-0.0204564	-0.0210048	-0.0295721	-0.0309794	-0.0125637	-0.0126609
Plate14	325	AAA	14	14	13	NA	YPR011C	91	120	166	4159	0.7493	31887	17798	30941	17502	91	119	127	3086	0.7901	29060	15574	28334	14898	92	120	155	3883	0.8659	32145	17927	31368	17638	92	119	152	3854	0.8459	31062	17401	30714	17857	-0.0595481	-0.00103049	-0.0464703	-0.0964989	-0.0259873	-0.00368032
Plate13	105	AAA	13	5	9	TYE7	YOR344C	73	80	84	1999	0.875	11048	4957	11695	5346	73	79	111	2648	0.8596	14555	6740	15461	7197	74	80	121	2976	0.8187	13626	7108	14523	7481	74	79	178	4326	0.8235	18965	10210	20144	10389	0.0222053	0.0559134	-0.0925448	-0.034032	0.0468148	0.0594933
Plate07	90	AAA	7	4	18	NCA3	YJL116C	39	110	129	3041	0.8598	23575	12045	25029	12361	39	109	127	2977	0.8319	24143	12457	25491	12770	40	110	129	3071	0.8146	23572	11924	25025	12300	40	109	133	3071	0.8389	23511	12364	24793	12246	0.0256726	0.0156408	0.0315222	0.0215966	-0.0106689	-0.0145785
Plate14	39	AAA	14	2	15	MSH4	YFL003C	67	116	143	3329	0.7882	20270	10129	21200	10462	67	115	159	3889	0.8101	21865	11062	22148	11046	68	116	159	3689	0.8703	18737	9813	19534	9817	68	115	141	3419	0.8805	19507	9963	20501	10215	-0.00070386	-0.00433818	-0.0429139	-0.0210772	0.00623633	0.0036768
Plate02	223	AAA	2	10	7	CLB3	YDL155W	19	84	156	3658	0.8089	25822	14744	26701	15352	19	83	164	3877	0.8386	25566	14567	26384	15242	20	84	160	3782	0.8483	24443	14294	25276	14858	20	83	161	3879	0.878	25746	14867	26579	15578	-0.0234525	-0.0329725	-0.0675283	-0.0497419	-0.00598919	-0.00553368
Plate06	54	AAA	6	3	6	NA	YGR176W	37	86	108	2475	0.883	12339	6244	13165	6382	37	85	107	2515	0.8476	11725	6100	12395	6342	38	86	109	2570	0.7467	11130	5882	11942	6106	38	85	90	2162	0.8639	11009	5763	11879	5985	0.0616368	-0.0215276	-0.0266979	-0.00757662	0.0270423	-0.0184707
Plate07	298	AAA	7	13	10	UBP7	YIL156W	57	126	166	4048	0.8885	22113	11091	23204	11405	57	125	180	4279	0.8646	22324	11636	23224	11991	58	126	158	3827	0.8911	22477	11220	23702	11183	58	125	166	4097	0.8246	22523	11332	23549	11538	0.000415833	-0.0601666	0.0597335	0.010386	-0.00995789	-0.0553082
Plate14	279	AAA	14	12	15	NA	YOR325W	87	116	145	3316	0.8439	22120	11567	23322	11730	87	115	135	3197	0.8385	22211	11513	23790	11615	88	116	141	3270	0.8947	22215	11341	23425	11248	88	115	134	3153	0.8533	21642	11135	23236	11173	-0.00237347	0.0418072	0.0596721	0.0557333	-0.0383328	-0.0257171
Plate03	267	AAA	3	12	3	DIT1	YDR403W	23	140	77	1893	0.8443	17587	6758	19150	7078	23	139	102	2547	0.8382	18805	7414	19565	7753	24	140	136	3427	0.8604	25484	10021	25679	10118	24	139	137	3494	0.8662	25418	10140	26351	10358	-0.0963575	-0.163529	0.0166522	0.0368983	-0.116744	-0.11065
Plate13	131	AAA	13	6	11	NA	YPL191C	75	76	100	2609	0.8149	14681	6905	15112	7167	75	75	81	2163	0.8507	14713	7040	14042	6889	76	76	105	2549	0.8069	14169	6770	14961	7182	76	75	71	1827	0.8189	13556	7383	13455	7270	0.0263667	-0.0337437	0.00808395	-0.171889	0.0401323	0.0173591
Plate06	219	AAA	6	10	3	CAP2	YIL034C	51	92	118	2821	0.8416	10927	5683	11647	6009	51	91	118	2814	0.8856	12076	6288	12822	6524	52	92	124	2948	0.8866	11085	5767	11765	6029	52	91	121	2877	0.8824	11594	5961	12224	6238	-0.043137	-0.00854143	-0.032252	-0.0201864	-0.0290441	-0.0152376
Plate10	254	AAA	10	11	14	ERV25	YML012W	85	22	130	3238	0.8859	8581	3986	8913	4129	85	21	196	5043	0.8348	11332	5690	11531	5845	86	22	139	3518	0.8359	9079	4114	9346	4160	86	21	79	2470	0.8821	13902	7105	14600	7252	-0.00698704	-0.0771702	0.056065	-0.00260758	-0.0056367	-0.0689471
Plate06	127	AAA	6	6	7	INP51	YIL002C	43	84	125	3137	0.9013	14856	7899	15594	8207	43	83	121	2977	0.8346	14449	7757	15444	8219	44	84	122	3096	0.8727	14257	7608	15162	8029	44	83	113	2807	0.8689	14442	7571	15344	7951	-0.0266551	-0.0432762	-0.0390209	-0.00757214	-0.0160334	-0.0329
Plate01	93	AAA	1	4	21	NA	YBR141C	7	8	128	2932	0.8628	11839	6058	12386	6463	7	7	159	3594	0.8304	11245	5576	11643	5762	8	8	159	3668	0.9047	12537	6283	13125	6618	8	7	158	3691	0.8638	11522	5841	12185	6139	-0.0663866	-0.00571756	-0.00979014	-0.0217926	-0.034904	0.0010196
Plate11	161	AAA	11	7	17	NA	YNL058C	45	16	162	3633	0.7274	15225	6076	15560	6140	45	15	162	3484	0.7627	15073	5991	15303	6091	46	16	146	3200	0.6635	14686	5890	14814	5908	46	15	157	3442	0.805	15017	6077	15113	6117	0.0104633	-0.0033088	-0.00995722	-0.0279369	-0.00250189	0.00193743
Plate06	286	AAA	6	12	22	NSG1	YHR133C	55	54	178	4417	0.805	26558	14877	27298	15368	55	53	188	4442	0.8543	25634	14393	26333	14454	56	54	190	4617	0.8255	27104	15065	28111	15630	56	53	187	4493	0.7806	26350	14692	27250	15236	-0.0480335	-0.0177594	-0.0270393	-0.038805	-0.0215172	-0.02868
Plate08	247	AAA	8	11	7	RMA1	YKL132C	21	84	198	4290	0.7155	27573	11586	28100	11650	21	83	210	4770	0.7511	28170	11926	28607	12022	22	84	203	4398	0.8313	27741	11611	28410	11762	22	83	202	4458	0.7813	27826	11588	28294	11633	-0.0189274	-0.030225	-0.013496	-0.00599716	-0.0176709	-0.0192043
Plate10	243	AAA	10	11	3	MVP1	YMR004W	85	44	164	4008	0.8395	9650	4644	9904	4801	85	43	170	4072	0.791	9208	4430	9542	4402	86	44	170	4253	0.8448	10843	5134	10924	5371	86	43	174	4358	0.8153	10530	5071	10794	5137	-0.047204	0.0120361	-0.0468917	-0.00548721	-0.0358404	-0.0426825
Plate01	171	AAA	1	8	3	SMP1	YBR182C	15	44	147	3303	0.8597	15575	8068	16543	8391	15	43	139	3162	0.8671	15664	8079	16320	8403	16	44	156	3485	0.8452	15949	8111	16718	8323	16	43	128	2772	0.9161	16213	8684	16928	9210	0.0228932	0.00017097	0.050026	-0.0678831	-0.0133535	-0.0065816
Plate06	78	AAA	6	4	6	NA	YHR080C	39	86	105	2497	0.8403	12318	6481	13160	6678	39	85	107	2736	0.8786	13109	6880	13936	7122	40	86	109	2640	0.8961	12791	6627	13445	6873	40	85	112	2854	0.8674	13410	7149	14066	7312	-0.000840816	-0.00201692	-0.00765808	-0.0240598	-0.0265804	-0.0144548
Plate02	230	AAA	2	10	14	NA	YDL027C	19	70	145	3440	0.8573	18440	10036	19523	9972	19	69	142	3322	0.8359	18096	9829	18863	9702	20	70	147	3524	0.8391	18514	10026	19029	9925	20	69	139	3266	0.8772	17902	9758	18603	9817	0.0464517	0.0281868	0.0122379	-0.00911607	-0.0195807	-0.0211655
Plate10	224	AAA	10	10	8	NA	YMR114C	83	34	138	3435	0.818	7961	3697	8402	3843	83	33	135	3249	0.8031	7584	3508	8041	3650	84	34	139	3178	0.7838	7289	3412	7801	3533	84	33	150	3717	0.8135	8353	3908	8778	4079	-0.0014656	0.00014514	-0.00275016	-0.0141261	-0.0168105	-0.0188497
Plate13	137	AAA	13	6	17	UIP4	YPL186C	75	64	132	3293	0.8355	14137	6717	14721	7144	75	63	90	2154	0.8583	10449	4908	10825	5035	76	64	74	1788	0.8243	9673	4672	10152	4909	76	63	77	2082	0.8567	15398	7585	15740	8056	-0.00970399	-0.018258	-0.0845748	-0.0683616	0.0192811	-0.0261984
Plate03	236	AAA	3	10	20	CHL4	YDR254W	19	106	162	3749	0.8498	38771	22234	40783	22958	19	105	152	3456	0.8309	38149	22035	40320	22821	20	106	167	3941	0.8771	39878	22838	42115	23271	20	105	171	3922	0.8566	39412	22865	41338	23246	0.000226442	-0.0153059	0.0473954	0.0132858	-0.0251895	-0.0460466
Plate10	239	AAA	10	10	23	NA	YMR193C-A	83	4	122	2871	0.8448	7130	3402	7299	3433	83	3	129	3046	0.8315	8389	3875	8661	3951	84	4	104	2510	0.7446	7553	3423	7866	3522	84	3	123	3195	0.8608	8306	3916	8452	3922	-0.0666279	0.00806328	0.01423	-0.0196751	-0.0707438	-0.00145166
Plate01	182	AAA	1	8	14	NA	YBR064W	15	22	179	4491	0.8781	21868	11746	22222	11823	15	21	181	4418	0.8776	21671	11742	22005	12201	16	22	179	4395	0.8253	23020	12397	23269	12941	16	21	193	4555	0.8483	20612	11083	21156	11403	0.0126021	-0.0448803	-0.038118	-0.014248	-0.00903742	-0.0224141
Plate10	266	AAA	10	12	2	JLP2	YMR132C	87	46	121	2928	0.8281	9484	4436	9779	4597	87	45	165	4288	0.8541	11248	5485	10868	5596	88	46	136	3406	0.8309	8995	4441	9052	4561	88	45	140	3682	0.7998	10630	4975	10420	4985	-0.00841725	-0.109961	-0.116906	-0.0194745	0.000355964	-0.0301619
Plate07	306	AAA	7	13	18	NA	YIL152W	57	110	131	3229	0.8579	22512	11309	23757	11579	57	109	143	3278	0.8212	21554	10918	22285	10940	58	110	136	3271	0.8785	22250	11236	23528	11313	58	109	137	3184	0.7911	22088	11108	23277	11126	0.0204895	-0.0145802	0.0332875	0.0362535	-0.00564648	-0.0314823
Plate14	206	AAA	14	9	14	ERV2	YPR037C	81	118	160	3966	0.8613	26525	14290	26337	14749	81	117	147	3636	0.823	26486	14302	26102	14785	82	118	161	4031	0.8652	27397	14503	27443	14612	82	117	162	3989	0.7976	28773	15406	28235	15898	-0.106029	-0.123543	-0.0279286	-0.0889769	-0.0358552	-0.039272
Plate01	237	AAA	1	10	21	NA	YBR184W	19	8	154	3511	0.875	11718	5928	12349	6078	19	7	149	3449	0.8783	11516	5704	12045	5905	20	8	154	3576	0.8394	11833	5919	12425	6139	20	7	133	3138	0.842	11868	6081	12384	6375	0.0122027	0.0131147	0.00807762	-0.0480661	-0.0206548	0.0059132
Plate10	325	AAA	10	14	13	RNH1	YMR234W	91	24	172	4315	0.8229	11490	5768	12077	5985	91	23	125	3247	0.8608	11594	5478	11877	5547	92	24	152	3818	0.8414	10173	4857	10846	5074	92	23	179	4595	0.8877	12186	5986	12701	6001	-0.0376247	0.038722	0.0185044	0.0364929	-0.0664832	0.017637
Plate01	234	AAA	1	10	18	NA	YBR074W	19	14	142	3341	0.854	13552	7027	14336	7362	19	13	144	3433	0.8593	14465	7424	15093	7840	20	14	139	3333	0.907	14653	7390	15299	7769	20	13	136	3223	0.8498	14181	7328	14822	7725	-0.019148	-0.0256013	0.00747429	-0.0333245	-0.034533	-0.0113203
Plate11	139	AAA	11	6	19	MSB3	YNL293W	43	12	168	3818	0.7456	15734	6380	15882	6409	43	11	188	4350	0.819	16295	6593	16358	6684	44	12	157	3596	0.7262	15296	6111	15318	6092	44	11	157	3410	0.8069	15088	5985	15395	6040	-0.0189305	-0.034277	-0.00206943	0.0173359	-0.0214079	-0.0155273
Plate04	296	AAA	4	13	8	AGE1	YDR524C	57	34	149	3721	0.876	14650	7627	15342	8098	57	33	150	3741	0.8826	14656	7668	15556	7935	58	34	145	3629	0.895	14283	7395	15027	7739	58	33	131	3309	0.8503	14115	7178	14982	7591	-0.0648774	-0.0157105	-0.0309335	-0.00792322	-0.0287273	-0.0358029
Plate07	236	AAA	7	10	20	CIS3	YJL158C	51	106	149	3608	0.8706	26838	14178	27568	14016	51	105	175	4095	0.827	28495	15734	29868	15949	52	106	149	3615	0.7649	26969	14393	28077	14512	52	105	154	3848	0.8581	28216	15096	29152	15384	0.0301522	0.00371869	0.0175567	0.00789368	-0.00606246	-0.0396908
Plate07	253	AAA	7	11	13	NA	YJL043W	53	120	179	4338	0.8388	23452	12120	24593	12512	53	119	170	4287	0.8305	24201	12493	25219	12996	54	120	171	4244	0.8664	23945	12341	24915	12806	54	119	165	4170	0.8416	23797	12173	24736	12747	-0.0183214	-0.0237295	-0.0255537	-0.0317468	-0.026997	-0.0143332
Plate08	118	AAA	8	5	22	ILM1	YJR118C	9	54	168	3433	0.8123	21801	8686	22625	8875	9	53	152	3106	0.7753	21274	8437	21850	8670	10	54	142	2902	0.7628	21351	8453	22213	8563	10	53	109	2236	0.7722	20191	7618	20841	7774	-0.00849108	-0.0324958	0.0097062	0.0370517	-0.0245158	-0.0255682
Plate14	230	AAA	14	10	14	AAC3	YBR085W	83	118	124	2977	0.8699	21545	11175	22936	11687	83	117	125	2974	0.8556	21350	10880	22493	10861	84	118	126	3003	0.8172	21387	11022	22644	11208	84	117	131	3128	0.876	21496	10994	22482	10978	-0.0237858	0.0421555	0.0111143	0.0272304	-0.0327058	-0.0106742
Plate11	158	AAA	11	7	14	DSK2	YMR276W	45	22	192	4342	0.6957	17637	7136	17893	7213	45	21	175	3907	0.7624	17138	6851	17449	6987	46	22	178	4103	0.6843	17476	7052	17736	7128	46	21	172	3902	0.7341	17151	6973	17425	7044	-0.0112791	-0.00238601	-0.00712368	-0.0159765	-0.0117132	0.00442853
Plate03	188	AAA	3	8	20	NA	YDR239C	15	106	167	3913	0.808	33395	16847	35033	17325	15	105	162	3807	0.8132	32985	16796	34635	16937	16	106	166	3842	0.8128	33650	17218	35342	16821	16	105	150	3479	0.8225	32272	16205	33949	16317	0.00372701	0.00617551	0.0506112	0.00820894	-0.0104718	-0.029771
Plate14	185	AAA	14	8	17	MSG5	YNL053W	79	112	146	3516	0.8781	26069	13698	27155	13950	79	111	138	3290	0.8428	24285	12711	25517	12912	80	112	143	3508	0.8724	24471	13011	25392	13199	80	111	140	3466	0.8296	24259	12670	25073	12909	0.0143783	0.0146501	-0.021613	-0.0129334	-0.00748169	-0.019419
Plate01	153	AAA	1	7	9	SKT5	YBL061C	13	32	159	4038	0.8782	19661	10300	20407	10706	13	31	155	3724	0.8913	19217	10260	19661	10693	14	32	144	3536	0.8793	19075	10127	19623	10670	14	31	160	3887	0.8465	19276	10292	19887	10838	0.0154661	-0.0400788	-0.0401422	-0.0407117	0.00710693	-0.0223945
Plate10	57	AAA	10	3	9	SML1	YML058W	69	32	150	3742	0.7984	7320	3458	7257	3425	69	31	92	2085	0.9001	5811	2678	6280	2846	70	32	78	1914	0.8412	6588	2886	6912	3082	70	31	115	2838	0.9136	7349	3385	7605	3558	-0.0723808	-0.045642	-0.00555056	-0.0514434	-0.0530885	-0.0535811
Plate03	62	AAA	3	3	14	RBS1	YDL189W	5	118	154	3601	0.8232	30280	14359	31689	14305	5	117	158	3599	0.8197	29786	14370	31806	14628	6	118	157	3790	0.8364	31107	14711	32433	14819	6	117	157	3602	0.848	29832	14209	31550	14300	0.020621	0.00367017	0.0256288	0.0129754	-0.0166884	-0.0471599
Plate03	189	AAA	3	8	21	GGA1	YDR358W	15	104	175	3970	0.8109	34625	18913	35994	19103	15	103	138	3090	0.8363	34385	17652	36114	18515	16	104	156	3632	0.85	34307	17816	36076	18030	16	103	135	3007	0.8563	34945	17984	36916	19302	-0.0470522	-0.00870597	0.0167158	-0.0106582	-0.06639	-0.0065239
Plate06	220	AAA	6	10	4	ECM14	YHR132C	51	90	125	3394	0.8254	19464	10380	19651	10659	51	89	142	3573	0.8382	16678	9134	17462	9590	52	90	146	3725	0.8788	17903	9708	18443	10245	52	89	148	3767	0.79	18279	9910	18731	10265	-0.0379992	-0.0702306	-0.078947	-0.0582784	0.0122617	-0.0426172
Plate10	154	AAA	10	7	10	HMG2	YLR450W	77	30	126	3116	0.8553	7569	3406	8051	3512	77	29	121	2938	0.8339	6340	2981	6582	3059	78	30	121	2943	0.8205	7539	3505	7934	3699	78	29	121	3065	0.8564	7542	3472	7819	3543	0.0538783	-0.0707786	-0.0384262	-0.00299737	0.0184377	-0.068639
Plate10	291	AAA	10	13	3	NA	YMR018W	89	44	146	3394	0.8521	8062	3801	8282	3874	89	43	153	3643	0.8508	8001	3781	8160	3751	90	44	78	1974	0.8532	7169	3168	7580	3316	90	43	130	2893	0.8312	6680	3115	7064	3129	-0.0344348	-0.013921	0.0382004	0.00761836	-0.0355437	-0.0398807
Plate01	89	AAA	1	4	17	ADH5	YBR145W	7	16	132	3146	0.8102	13447	6906	14049	7320	7	15	152	3513	0.839	13642	6898	14401	7192	8	16	134	3133	0.7813	13064	6597	13751	6920	8	15	146	3390	0.8197	13068	6717	13616	7016	-0.0423395	0.0194342	0.00102192	-0.032747	-0.0224348	0.000922661
Plate02	345	AAA	2	15	9	THR4	YCR053W	29	80	150	3328	0.8337	14956	8043	14922	7730	29	79	142	3143	0.8207	15766	8378	16146	8468	30	80	164	3570	0.7766	16925	8982	16792	8766	30	79	143	3233	0.8617	15314	7925	15512	7856	-0.044605	-0.0389391	-0.0222564	-0.00432361	-0.0513407	-0.0232432
Plate06	315	AAA	6	14	3	NA	YIL059C	59	92	153	3746	0.8704	15507	8537	16078	8867	59	91	162	3920	0.8455	16361	8995	16937	9002	60	92	139	3401	0.9085	15582	8357	16076	8517	60	91	121	2928	0.8887	15818	7987	16680	8331	-0.0868875	-0.0291749	-0.0316477	0.0544049	-0.0586855	-0.0502819
Plate13	172	AAA	13	8	4	NA	YPL107W	79	90	84	2219	0.8717	19441	9546	19814	9900	79	89	98	2449	0.8585	14018	6745	14726	7044	80	90	137	3187	0.872	14411	7602	14391	7490	80	89	125	3176	0.8446	17548	8764	18097	9134	0.00606554	0.00976414	-0.108228	-0.023715	0.0323773	0.000671892
Plate09	352	AAA	9	15	16	FMP25	YLR077W	29	114	190	4135	0.8116	29038	11323	29645	11389	29	113	196	4209	0.8176	28975	11204	29608	11251	30	114	188	4028	0.8023	29061	11134	29845	11210	30	113	199	4199	0.8008	29304	11407	29988	11376	-0.0179506	-0.00326173	0.0138614	0.00113135	-0.0211786	-0.0100831
Plate13	250	AAA	13	11	10	FSH3	YOR280C	85	78	126	2897	0.7793	15505	7543	16656	7978	85	77	172	4099	0.8351	18562	10190	19237	10506	86	78	150	3873	0.804	22923	12006	22183	12180	86	77	110	2794	0.8363	21656	10589	21778	10768	0.0316982	-0.119681	-0.102757	0.0365475	0.00473617	-0.126925
Plate06	246	AAA	6	11	6	SPG1	YGR236C	53	86	117	2899	0.8579	14033	7366	14716	7715	53	85	124	3065	0.8564	14104	7680	14783	8009	54	86	109	2722	0.875	13935	7334	14567	7507	54	85	110	2746	0.8714	14138	7375	14998	7783	-0.0293682	-0.0738675	-0.00722767	-0.0127218	-0.00565312	-0.0555732
Plate08	275	AAA	8	12	11	SPA2	YLL021W	23	76	195	4345	0.8009	26737	11080	27228	11291	23	75	197	4420	0.7572	26930	11232	27260	11351	24	76	192	4261	0.8277	26693	10967	27175	11082	24	75	207	4770	0.8038	25003	10229	25362	10372	-0.0293824	-0.0343104	-0.0084684	-0.0326216	-0.0111195	-0.0167456
Plate09	261	AAA	9	11	21	STM1	YLR150W	21	104	139	2863	0.7791	25633	9707	26470	9669	21	103	125	2644	0.7708	25549	9800	26522	9948	22	104	133	2788	0.7476	25314	9536	26105	9611	22	103	167	3536	0.7291	27332	10587	28170	10540	0.0300842	-0.00516821	0.0167727	0.00928745	-0.00339167	-0.0212788
Plate04	104	AAA	4	5	8	TSA2	YDR453C	41	34	146	3794	0.8385	15968	8252	16286	8623	41	33	147	3822	0.8076	15989	8261	16378	8700	42	34	149	3893	0.8597	16067	8345	16272	8487	42	33	145	3796	0.8372	16401	8522	16482	8811	-0.0664213	-0.0707744	-0.0451244	-0.0794771	-0.016108	-0.0157569
Plate09	164	AAA	9	7	20	GAT3	YLR013W	13	106	186	4089	0.7485	27335	10474	27882	10442	13	105	186	4160	0.7538	27684	10600	28147	10518	14	106	189	4101	0.7593	27944	10873	28480	10784	14	105	188	4191	0.8341	28009	10780	28400	10668	0.00618783	0.0108656	-0.00497854	0.00538019	-0.00745026	-0.00425996
Plate10	77	AAA	10	4	5	ALD3	YMR169c	71	40	NA	NA	NA	NA	NA	NA	NA	71	39	173	4721	0.8142	10902	5366	10715	5324	72	40	156	4187	0.8605	10604	5075	10316	5152	72	39	165	4383	0.8429	10769	5130	10454	5077	NA	-0.0648609	-0.0792244	-0.0390324	NA	-0.0477116
Plate03	45	AAA	3	2	21	HNT2	YDR305C	3	104	107	2291	0.7547	31316	15062	33616	15567	3	103	153	3216	0.8104	33647	17381	35107	17429	4	104	154	3274	0.774	32299	15969	34032	16152	4	103	142	3036	0.8005	31673	15773	33106	15759	0.0393911	0.00141545	0.0233275	-0.00153817	-0.00750529	-0.0298349
Plate06	262	AAA	6	11	22	NA	YGR228W	53	54	163	3983	0.8353	27705	15223	28032	16016	53	53	163	3948	0.8527	25830	14420	26407	15034	54	54	152	3846	0.7856	27577	15512	27821	15743	54	53	162	3893	0.8061	27988	15891	27983	16496	-0.0648621	-0.0677821	-0.0526021	-0.108131	0.00996807	-0.0198723
Plate13	150	AAA	13	7	6	SRL1	YOR247W	77	86	96	2187	0.8251	10876	5121	11196	5239	77	85	131	3146	0.8675	13480	6655	14079	6913	78	86	133	3218	0.8238	14034	6879	14131	6908	78	85	155	4093	0.8642	17753	8866	17447	8833	-0.0186489	-0.0343488	-0.0276877	-0.0344968	-0.0210136	-0.0414642
Plate07	279	AAA	7	12	15	BNA2	YJR078W	55	116	124	3034	0.8154	22010	11103	23192	11506	55	115	123	3033	0.793	21730	10838	23106	10871	56	116	131	3069	0.8422	21260	10660	22561	10736	56	115	125	3050	0.857	21822	10921	22832	11153	-0.0113497	0.0528259	0.0290078	0.00146029	-0.0188855	-0.00900318
Plate06	124	AAA	6	6	4	GRE3	YHR104W	43	90	109	2773	0.8874	13325	6919	13875	7171	43	89	93	2379	0.8791	11716	6125	12237	6470	44	90	116	2819	0.885	12341	6554	13018	6924	44	89	108	2659	0.785	12298	6369	12867	6562	-0.0180598	-0.0682878	-0.0667556	-0.0111379	0.0024515	-0.0252278
Plate14	239	AAA	14	10	23	CYB5	YNL111C	83	100	158	3894	0.8014	27945	15071	27563	14793	83	99	172	4103	0.8954	25504	13588	25348	13280	84	100	159	3985	0.8307	29039	15386	28826	15968	84	99	170	4110	0.8585	26662	14376	26490	14602	-0.0365725	-0.0322814	-0.0608875	-0.0839118	-0.0230644	-0.0311886
Plate04	213	AAA	4	9	21	MAK10	YEL053C	49	8	173	4356	0.8851	22909	12028	23326	12761	49	7	158	4021	0.828	22474	11687	23033	12405	50	8	157	4097	0.823	23624	12089	24451	12783	50	7	176	4450	0.8334	23337	12324	24059	12894	-0.0935752	-0.0722538	-0.0265596	-0.0625906	-0.0301205	-0.0169191
Plate11	70	AAA	11	3	22	NA	YMR244W	37	6	160	3262	0.8038	13692	5458	14031	5510	37	5	152	3183	0.7908	13916	5514	14042	5602	38	6	152	3247	0.7419	13728	5352	13976	5417	38	5	143	2888	0.8636	12792	5075	13153	5170	0.00281936	-0.0184517	0.0198442	-0.0111504	-0.0167528	-0.00568299
Plate04	87	AAA	4	4	15	DNF1	YER166W	39	20	135	3179	0.8066	13321	6905	13833	6961	39	19	130	3070	0.812	13805	7105	14275	7133	40	20	135	3379	0.8243	14162	7417	14737	7384	40	19	131	3113	0.8005	14354	7326	15136	7702	-0.00196389	0.00949763	0.00713423	-0.0135358	-0.0248677	-0.0137628
Plate13	56	AAA	13	3	8	NA	YOR215C	69	82	125	3065	0.8151	16028	8180	16727	8499	69	81	140	3472	0.8608	17880	8935	18077	9062	70	82	148	3639	0.798	18374	9289	18816	9772	70	81	141	3498	0.8691	16882	8432	17426	8783	-0.047128	-0.0147078	-0.0553991	-0.0286726	-0.0539617	-0.00596907
Plate09	328	AAA	9	14	16	EXG1	YLR300W	27	114	207	4690	0.7654	28990	11317	29275	11233	27	113	184	4040	0.8051	28602	10972	29117	10813	28	114	196	4372	0.7897	29018	11232	29392	11199	28	113	186	4021	0.7729	28675	11070	29257	11038	-0.0183317	0.0251885	-0.00812507	0.0045397	-0.0229738	-0.00132639
Plate13	159	AAA	13	7	15	MSC6	YOR354C	77	68	59	434	0.8431	NA	149	NA	135	77	67	127	3259	0.8978	22054	11701	23208	12285	78	68	91	2513	0.8764	22037	10869	21897	10825	78	67	79	2151	0.8404	22464	12065	22744	11957	NA	-0.045485	0.0377009	-0.0395244	NA	-0.051537
Plate07	175	AAA	7	8	7	CYC1	YJR048W	47	132	143	3556	0.858	20932	9987	21782	10394	47	131	113	2760	0.8329	17535	8671	18557	9106	48	132	119	2873	0.8741	17153	8270	18087	8606	48	131	142	3513	0.8683	20005	9510	20993	9979	0.0112967	-0.0877467	-0.0595996	0.00115998	0.0341465	-0.072232
Plate10	311	AAA	10	13	23	PLB2	YMR006C	89	4	145	3665	0.8112	10322	5199	10532	5404	89	3	169	4246	0.8061	11066	5381	11239	5494	90	4	100	2705	0.8202	12280	5784	12463	5909	90	3	156	4087	0.8653	11975	5759	12072	5873	-0.111459	-0.0334937	0.0280629	-0.0128896	-0.0876547	-0.0288247
Plate10	274	AAA	10	12	10	DLT1	YMR126C	87	30	161	3856	0.8599	8578	4050	9093	4162	87	29	171	4432	0.8468	9520	4713	10003	4784	88	30	167	4141	0.8828	8748	4254	9044	4274	88	29	117	2936	0.8388	8677	3783	9201	3947	0.0131246	-0.0271061	-0.0308984	0.102623	-0.0279223	-0.0765939
Plate03	357	AAA	3	15	21	TCI1	YDR161W	29	104	123	2700	0.8055	29561	14392	30660	14418	29	103	168	3594	0.7932	32001	16120	33182	15768	30	104	141	3097	0.8043	31397	15138	32347	14809	30	103	149	3224	0.887	33061	16009	34074	15635	-0.0479117	0.00207023	0.021486	0.0596631	-0.0624755	-0.0410944
Plate06	258	AAA	6	11	18	BNS1	YGR230W	53	62	162	4039	0.8779	23124	12818	24267	13026	53	61	150	3664	0.8879	21552	11799	22752	12176	54	62	140	3411	0.8545	20739	11226	21459	11465	54	61	167	4033	0.8272	23450	13088	24357	13007	0.00287134	-0.00103054	-0.00605252	0.0104577	-0.0220665	-0.0126146
Plate07	331	AAA	7	14	19	JSN1	YJR091C	59	108	137	3131	0.8063	21973	10963	22688	10897	59	107	138	3163	0.7796	22625	11285	23757	11081	60	108	121	2873	0.8254	21227	10846	22211	10817	60	107	138	3179	0.8651	23000	11698	23991	11628	0.0198065	0.0748947	-0.00604494	0.0314193	-0.0055351	0.00515203
Plate12	314	AAA	12	14	2	NA	YOR084W	59	94	113	2155	0.7201	17746	6982	17648	7008	59	93	98	2004	0.5917	16741	6517	17023	6551	60	94	80	1289	0.5056	NA	5442	NA	5473	60	93	62	1217	0.4408	NA	5791	NA	6008	-0.0366598	0.00147666	NA	NA	-0.0174204	-0.0110554
Plate07	262	AAA	7	11	22	CSM2	YIL132C	53	102	153	3530	0.8528	25007	13065	26296	13152	53	101	150	3530	0.8449	25586	13123	26673	13254	54	102	153	3581	0.8545	25402	13361	26644	13553	54	101	147	3454	0.7906	24013	12594	24559	12532	0.0305762	0.0445505	0.0152329	-0.0225774	-0.0177223	0.0138399
[truncated: 2,502 more rows]
[truncated: 5 more columns]

## Sheet: Deletion_Screen_NON
Plate	Strain	DA.Gene	DA.ORD	GFP_Mean.1	RFP_Mean.1	GFP_Med.1	RFP_Med.1	GFP_Mean.2	RFP_Mean.2	GFP_Med.2	RFP_Med.2	GFP_Mean.3	RFP_Mean.3	GFP_Med.3	RFP_Med.3	GFP_Mean.4	RFP_Mean.4	GFP_Med.4	RFP_Med.4	medlogRatioNorm.1	medlogRatioNorm.2	medlogRatioNorm.3	medlogRatioNorm.4	meanlogRatioNorm.1	meanlogRatioNorm.2	meanlogRatioNorm.3	meanlogRatioNorm.4	Avg_medlogratioNorm	Avg_meanlogratioNorm	Z_LOG
[truncated: 4,242 more rows]

[truncated: 4 more sheets: Deletion_Screen_OPT, Deletion_Screen_CGA, Screen Overlaps, Key for Columns]
