# Supplementary material for: Distinct elongation stalls during translation are linked with distinct pathways for mRNA degradation
Source: eLife. 2022 Jul 27;11:e76038. doi: 10.7554/eLife.76038 (PMC9352352; doi:10.7554/eLife.76038)
Supplement: Supplementary file 5. [file elife-76038-supp5.csv]

contrast	adj.p.value	figure
cue2_cga - cue2slh1syh1_cga	0.0012548271629409	2b
cue2_cga - cue2syh1_cga	7.3490221744188e-05	2b
cue2_cga - hel2_cga	0.999999979481997	2b
cue2_cga - hel2syh1_cga	2.62234111170212e-06	2b
cue2_cga - slh1_cga	0.0542114854528755	2b
cue2_cga - slh1syh1_cga	0.999997827691798	2b
cue2_cga - syh1_cga	0.958560627172107	2b
cue2_cga - wt_cga	0.999999999996773	2b
cue2slh1syh1_cga - cue2syh1_cga	0.999999999976032	2b
cue2slh1syh1_cga - hel2_cga	0.0001639823382646	2b
cue2slh1syh1_cga - hel2syh1_cga	0.993269857992599	2b
cue2slh1syh1_cga - slh1_cga	5.04368857789927e-08	2b
cue2slh1syh1_cga - slh1syh1_cga	2.24000165349736e-05	2b
cue2slh1syh1_cga - syh1_cga	0.0266561638532419	2b
cue2slh1syh1_cga - wt_cga	0.000199853765164	2b
cue2syh1_cga - hel2_cga	1.04993601650616e-05	2b
cue2syh1_cga - hel2syh1_cga	0.999512669062016	2b
cue2syh1_cga - slh1_cga	1.95827720705921e-09	2b
cue2syh1_cga - slh1syh1_cga	3.91380001674158e-06	2b
cue2syh1_cga - syh1_cga	0.0051288792460424	2b
cue2syh1_cga - wt_cga	1.66892668962415e-05	2b
hel2_cga - hel2syh1_cga	4.00394207233923e-07	2b
hel2_cga - slh1_cga	0.174051837670856	2b
hel2_cga - slh1syh1_cga	1.0	2b
hel2_cga - syh1_cga	0.71095159872246	2b
hel2_cga - wt_cga	1.0	2b
hel2syh1_cga - slh1_cga	1.05472963696229e-10	2b
hel2syh1_cga - slh1syh1_cga	1.925815887871e-07	2b
hel2syh1_cga - syh1_cga	0.0002231750059379	2b
hel2syh1_cga - wt_cga	6.56279481758837e-07	2b
slh1_cga - slh1syh1_cga	0.309476763504717	2b
slh1_cga - syh1_cga	0.0005908163801151	2b
slh1_cga - wt_cga	0.110879772275691	2b
slh1syh1_cga - syh1_cga	0.550259055291015	2b
slh1syh1_cga - wt_cga	0.999999998980743	2b
syh1_cga - wt_cga	0.830285929714428	2b
HEL2_CGA - SKI2_CGA	0.113986216932214	1d
HEL2_CGA - SLH1_CGA	0.013360309900163	1d
HEL2_CGA - SYH1_CGA	1.2381711989029e-07	1d
HEL2_CGA - WT_CGA	0.0065585579939819	1d
HEL2_CGA - XRN1_CGA	3.49343998173879e-10	1d
SKI2_CGA - SLH1_CGA	9.54316091261731e-06	1d
SKI2_CGA - SYH1_CGA	7.56372126994309e-05	1d
SKI2_CGA - WT_CGA	0.962577956436844	1d
SKI2_CGA - XRN1_CGA	5.8194495000663e-08	1d
SLH1_CGA - SYH1_CGA	1.18646870106431e-10	1d
SLH1_CGA - WT_CGA	6.27698265809329e-07	1d
SLH1_CGA - XRN1_CGA	1.2946310690153999e-12	1d
SYH1_CGA - WT_CGA	0.0015974844363844	1d
SYH1_CGA - XRN1_CGA	0.0577466798490602	1d
WT_CGA - XRN1_CGA	7.25757617558997e-07	1d
hel2_minCGA - hel2smy2_minCGA	0.0135937724584148	s2b
hel2_minCGA - hel2syh1_minCGA	8.13782374819993e-12	s2b
hel2_minCGA - hel2syh1smy2_minCGA	1.96065386148803e-13	s2b
hel2_minCGA - smy2_minCGA	0.999841328104582	s2b
hel2_minCGA - syh1_minCGA	0.997376828687032	s2b
hel2_minCGA - syh1smy2_minCGA	0.0001427574524467	s2b
hel2_minCGA - wt_minCGA	0.999997878389914	s2b
hel2smy2_minCGA - hel2syh1_minCGA	5.82251804548406e-08	s2b
hel2smy2_minCGA - hel2syh1smy2_minCGA	4.10601108669084e-10	s2b
hel2smy2_minCGA - smy2_minCGA	0.108462082644588	s2b
hel2smy2_minCGA - syh1_minCGA	0.183679497131653	s2b
hel2smy2_minCGA - syh1smy2_minCGA	0.9059194869723	s2b
hel2smy2_minCGA - wt_minCGA	0.0024824916711707	s2b
hel2syh1_minCGA - hel2syh1smy2_minCGA	0.628962633829575	s2b
hel2syh1_minCGA - smy2_minCGA	3.99392741101678e-11	s2b
hel2syh1_minCGA - syh1_minCGA	6.47966125200128e-11	s2b
hel2syh1_minCGA - syh1smy2_minCGA	4.63655547289221e-06	s2b
hel2syh1_minCGA - wt_minCGA	2.22655227588575e-12	s2b
hel2syh1smy2_minCGA - smy2_minCGA	7.087663789206999e-13	s2b
hel2syh1smy2_minCGA - syh1_minCGA	1.01041397471135e-12	s2b
hel2syh1smy2_minCGA - syh1smy2_minCGA	1.81324599779487e-08	s2b
hel2syh1smy2_minCGA - wt_minCGA	6.79456491070596e-14	s2b
smy2_minCGA - syh1_minCGA	0.99999999999405	s2b
smy2_minCGA - syh1smy2_minCGA	0.0014423565372188	s2b
smy2_minCGA - wt_minCGA	0.962554770086977	s2b
syh1_minCGA - syh1smy2_minCGA	0.002821487964684	s2b
syh1_minCGA - wt_minCGA	0.886840293138557	s2b
syh1smy2_minCGA - wt_minCGA	2.37431754873674e-05	s2b
hel2_minCGA - hel2mbf1_minCGA	0.636451704268877	s2e
hel2_minCGA - hel2syh1_minCGA	4.71349612929384e-06	s2e
hel2_minCGA - mbf1_minCGA	0.498081447041892	s2e
hel2_minCGA - syh1_minCGA	0.578798088272989	s2e
hel2_minCGA - syh1mbf1_minCGA	0.0013414330209863	s2e
hel2_minCGA - wt_minCGA	0.999761391925303	s2e
hel2mbf1_minCGA - hel2syh1_minCGA	0.0010423512689817	s2e
hel2mbf1_minCGA - mbf1_minCGA	0.999999999853217	s2e
hel2mbf1_minCGA - syh1_minCGA	1.0	s2e
hel2mbf1_minCGA - syh1mbf1_minCGA	0.199613317968543	s2e
hel2mbf1_minCGA - wt_minCGA	0.980227545729213	s2e
hel2syh1_minCGA - mbf1_minCGA	0.0023006115165987	s2e
hel2syh1_minCGA - syh1_minCGA	0.0014128926303741	s2e
hel2syh1_minCGA - syh1mbf1_minCGA	0.577137752656877	s2e
hel2syh1_minCGA - wt_minCGA	3.58871245296211e-05	s2e
mbf1_minCGA - syh1_minCGA	1.0	s2e
mbf1_minCGA - syh1mbf1_minCGA	0.323560643580142	s2e
mbf1_minCGA - wt_minCGA	0.932910325917683	s2e
syh1_minCGA - syh1mbf1_minCGA	0.24288663767792	s2e
syh1_minCGA - wt_minCGA	0.965365887778332	s2e
syh1mbf1_minCGA - wt_minCGA	0.0106383206505453	s2e
cue2_cga - cue2slh1syh1_cga	0.0012548271629409	s2a
cue2_cga - cue2syh1_cga	7.3490221744188e-05	s2a
cue2_cga - hel2_cga	0.999999979481997	s2a
cue2_cga - hel2syh1_cga	2.62234111170212e-06	s2a
cue2_cga - slh1_cga	0.0542114854528755	s2a
cue2_cga - slh1syh1_cga	0.999997827691798	s2a
cue2_cga - syh1_cga	0.958560627172107	s2a
cue2_cga - wt_cga	0.999999999996773	s2a
cue2slh1syh1_cga - cue2syh1_cga	0.999999999976032	s2a
cue2slh1syh1_cga - hel2_cga	0.0001639823382646	s2a
cue2slh1syh1_cga - hel2syh1_cga	0.993269857992599	s2a
cue2slh1syh1_cga - slh1_cga	5.04368857789927e-08	s2a
cue2slh1syh1_cga - slh1syh1_cga	2.24000165349736e-05	s2a
cue2slh1syh1_cga - syh1_cga	0.0266561638532419	s2a
cue2slh1syh1_cga - wt_cga	0.000199853765164	s2a
cue2syh1_cga - hel2_cga	1.04993601650616e-05	s2a
cue2syh1_cga - hel2syh1_cga	0.999512669062016	s2a
cue2syh1_cga - slh1_cga	1.95827720705921e-09	s2a
cue2syh1_cga - slh1syh1_cga	3.91380001674158e-06	s2a
cue2syh1_cga - syh1_cga	0.0051288792460424	s2a
cue2syh1_cga - wt_cga	1.66892668962415e-05	s2a
hel2_cga - hel2syh1_cga	4.00394207233923e-07	s2a
hel2_cga - slh1_cga	0.174051837670856	s2a
hel2_cga - slh1syh1_cga	1.0	s2a
hel2_cga - syh1_cga	0.71095159872246	s2a
hel2_cga - wt_cga	1.0	s2a
hel2syh1_cga - slh1_cga	1.05472963696229e-10	s2a
hel2syh1_cga - slh1syh1_cga	1.925815887871e-07	s2a
hel2syh1_cga - syh1_cga	0.0002231750059379	s2a
hel2syh1_cga - wt_cga	6.56279481758837e-07	s2a
slh1_cga - slh1syh1_cga	0.309476763504717	s2a
slh1_cga - syh1_cga	0.0005908163801151	s2a
slh1_cga - wt_cga	0.110879772275691	s2a
slh1syh1_cga - syh1_cga	0.550259055291015	s2a
slh1syh1_cga - wt_cga	0.999999998980743	s2a
syh1_cga - wt_cga	0.830285929714428	s2a
dhh1∆_minNONOPT - dhh1∆_minOPT	0.0	4b
dhh1∆_minNONOPT - dhh1∆_CGA	0.0	4b
dhh1∆_minNONOPT - hel2∆_minNONOPT	0.0	4b
dhh1∆_minNONOPT - hel2∆_minOPT	0.0	4b
dhh1∆_minNONOPT - hel2∆_CGA	0.215971510370233	4b
dhh1∆_minNONOPT - hel2∆syh1∆_minNONOPT	2.1997403898410497e-11	4b
dhh1∆_minNONOPT - hel2∆syh1∆_minOPT	0.0	4b
dhh1∆_minNONOPT - hel2∆syh1∆_CGA	0.0	4b
dhh1∆_minNONOPT - not5∆_minNONOPT	0.0	4b
dhh1∆_minNONOPT - not5∆_minOPT	0.0	4b
dhh1∆_minNONOPT - not5∆_CGA	1.6246293199628801e-09	4b
dhh1∆_minNONOPT - syh1∆_minNONOPT	0.0	4b
dhh1∆_minNONOPT - syh1∆_minOPT	0.0	4b
dhh1∆_minNONOPT - syh1∆_CGA	1.27038823904968e-10	4b
dhh1∆_minNONOPT - WT_minNONOPT	0.0	4b
dhh1∆_minNONOPT - WT_minOPT	0.0	4b
dhh1∆_minNONOPT - WT_CGA	0.889975789368893	4b
dhh1∆_minOPT - dhh1∆_CGA	0.937740962905704	4b
dhh1∆_minOPT - hel2∆_minNONOPT	0.0	4b
dhh1∆_minOPT - hel2∆_minOPT	0.004214436709277	4b
dhh1∆_minOPT - hel2∆_CGA	0.0	4b
dhh1∆_minOPT - hel2∆syh1∆_minNONOPT	0.0	4b
dhh1∆_minOPT - hel2∆syh1∆_minOPT	0.0069947199146421	4b
dhh1∆_minOPT - hel2∆syh1∆_CGA	0.997406028194873	4b
dhh1∆_minOPT - not5∆_minNONOPT	2.26843593020831e-07	4b
dhh1∆_minOPT - not5∆_minOPT	0.159968324050238	4b
dhh1∆_minOPT - not5∆_CGA	0.0	4b
dhh1∆_minOPT - syh1∆_minNONOPT	0.0	4b
dhh1∆_minOPT - syh1∆_minOPT	0.0048043839792132	4b
dhh1∆_minOPT - syh1∆_CGA	2.17359463761113e-12	4b
dhh1∆_minOPT - WT_minNONOPT	0.0	4b
dhh1∆_minOPT - WT_minOPT	0.0003434958036794	4b
dhh1∆_minOPT - WT_CGA	0.0	4b
dhh1∆_CGA - hel2∆_minNONOPT	0.0	4b
dhh1∆_CGA - hel2∆_minOPT	0.300288204940233	4b
dhh1∆_CGA - hel2∆_CGA	0.0	4b
dhh1∆_CGA - hel2∆syh1∆_minNONOPT	0.0	4b
dhh1∆_CGA - hel2∆syh1∆_minOPT	0.401958335330481	4b
dhh1∆_CGA - hel2∆syh1∆_CGA	0.184504666406716	4b
dhh1∆_CGA - not5∆_minNONOPT	4.67181819022722e-05	4b
dhh1∆_CGA - not5∆_minOPT	0.988446755157536	4b
dhh1∆_CGA - not5∆_CGA	1.8506862708989002e-11	4b
dhh1∆_CGA - syh1∆_minNONOPT	0.0	4b
dhh1∆_CGA - syh1∆_minOPT	0.324795506283017	4b
dhh1∆_CGA - syh1∆_CGA	2.18155715714374e-10	4b
dhh1∆_CGA - WT_minNONOPT	0.0	4b
dhh1∆_CGA - WT_minOPT	0.0489211063517234	4b
dhh1∆_CGA - WT_CGA	0.0	4b
hel2∆_minNONOPT - hel2∆_minOPT	0.0	4b
hel2∆_minNONOPT - hel2∆_CGA	0.0	4b
hel2∆_minNONOPT - hel2∆syh1∆_minNONOPT	0.903134440920079	4b
hel2∆_minNONOPT - hel2∆syh1∆_minOPT	0.0	4b
hel2∆_minNONOPT - hel2∆syh1∆_CGA	0.0	4b
hel2∆_minNONOPT - not5∆_minNONOPT	0.0	4b
hel2∆_minNONOPT - not5∆_minOPT	0.0	4b
hel2∆_minNONOPT - not5∆_CGA	0.0	4b
hel2∆_minNONOPT - syh1∆_minNONOPT	0.998451370115727	4b
hel2∆_minNONOPT - syh1∆_minOPT	0.0	4b
hel2∆_minNONOPT - syh1∆_CGA	0.0	4b
hel2∆_minNONOPT - WT_minNONOPT	0.726870489666499	4b
hel2∆_minNONOPT - WT_minOPT	0.0	4b
hel2∆_minNONOPT - WT_CGA	0.0	4b
hel2∆_minOPT - hel2∆_CGA	0.0	4b
hel2∆_minOPT - hel2∆syh1∆_minNONOPT	0.0	4b
hel2∆_minOPT - hel2∆syh1∆_minOPT	1.0	4b
hel2∆_minOPT - hel2∆syh1∆_CGA	3.65018026762254e-05	4b
hel2∆_minOPT - not5∆_minNONOPT	0.144490118542131	4b
hel2∆_minOPT - not5∆_minOPT	0.990326939133539	4b
hel2∆_minOPT - not5∆_CGA	5.04779844590075e-08	4b
hel2∆_minOPT - syh1∆_minNONOPT	0.0	4b
hel2∆_minOPT - syh1∆_minOPT	1.0	4b
hel2∆_minOPT - syh1∆_CGA	8.17365344629728e-07	4b
hel2∆_minOPT - WT_minNONOPT	0.0	4b
hel2∆_minOPT - WT_minOPT	0.999984067909153	4b
hel2∆_minOPT - WT_CGA	0.0	4b
hel2∆_CGA - hel2∆syh1∆_minNONOPT	0.0	4b
hel2∆_CGA - hel2∆syh1∆_minOPT	0.0	4b
hel2∆_CGA - hel2∆syh1∆_CGA	0.0	4b
hel2∆_CGA - not5∆_minNONOPT	6.35747010591103e-12	4b
hel2∆_CGA - not5∆_minOPT	0.0	4b
hel2∆_CGA - not5∆_CGA	1.31973560583143e-05	4b
hel2∆_CGA - syh1∆_minNONOPT	0.0	4b
hel2∆_CGA - syh1∆_minOPT	0.0	4b
hel2∆_CGA - syh1∆_CGA	7.62135382248452e-07	4b
hel2∆_CGA - WT_minNONOPT	0.0	4b
hel2∆_CGA - WT_minOPT	0.0	4b
hel2∆_CGA - WT_CGA	0.999003647021317	4b
hel2∆syh1∆_minNONOPT - hel2∆syh1∆_minOPT	0.0	4b
hel2∆syh1∆_minNONOPT - hel2∆syh1∆_CGA	0.0	4b
hel2∆syh1∆_minNONOPT - not5∆_minNONOPT	0.0	4b
hel2∆syh1∆_minNONOPT - not5∆_minOPT	0.0	4b
hel2∆syh1∆_minNONOPT - not5∆_CGA	0.0	4b
hel2∆syh1∆_minNONOPT - syh1∆_minNONOPT	0.211795318335701	4b
hel2∆syh1∆_minNONOPT - syh1∆_minOPT	0.0	4b
hel2∆syh1∆_minNONOPT - syh1∆_CGA	0.0	4b
hel2∆syh1∆_minNONOPT - WT_minNONOPT	0.0201504444177739	4b
hel2∆syh1∆_minNONOPT - WT_minOPT	0.0	4b
hel2∆syh1∆_minNONOPT - WT_CGA	0.0	4b
hel2∆syh1∆_minOPT - hel2∆syh1∆_CGA	6.54159914775798e-05	4b
hel2∆syh1∆_minOPT - not5∆_minNONOPT	0.0976884506597587	4b
hel2∆syh1∆_minOPT - not5∆_minOPT	0.997687651401699	4b
hel2∆syh1∆_minOPT - not5∆_CGA	3.00513757212073e-08	4b
hel2∆syh1∆_minOPT - syh1∆_minNONOPT	0.0	4b
hel2∆syh1∆_minOPT - syh1∆_minOPT	1.0	4b
hel2∆syh1∆_minOPT - syh1∆_CGA	4.78567967476806e-07	4b
hel2∆syh1∆_minOPT - WT_minNONOPT	0.0	4b
hel2∆syh1∆_minOPT - WT_minOPT	0.999790204521649	4b
hel2∆syh1∆_minOPT - WT_CGA	0.0	4b
hel2∆syh1∆_CGA - not5∆_minNONOPT	1.26312960091468e-09	4b
hel2∆syh1∆_CGA - not5∆_minOPT	0.0035862037118327	4b
hel2∆syh1∆_CGA - not5∆_CGA	0.0	4b
hel2∆syh1∆_CGA - syh1∆_minNONOPT	0.0	4b
hel2∆syh1∆_CGA - syh1∆_minOPT	4.24029494013878e-05	4b
hel2∆syh1∆_CGA - syh1∆_CGA	0.0	4b
hel2∆syh1∆_CGA - WT_minNONOPT	0.0	4b
hel2∆syh1∆_CGA - WT_minOPT	2.29749166313908e-06	4b
hel2∆syh1∆_CGA - WT_CGA	0.0	4b
not5∆_minNONOPT - not5∆_minOPT	0.0036658668775198	4b
not5∆_minNONOPT - not5∆_CGA	0.0009456987475263	4b
not5∆_minNONOPT - syh1∆_minNONOPT	0.0	4b
not5∆_minNONOPT - syh1∆_minOPT	0.131006717554449	4b
not5∆_minNONOPT - syh1∆_CGA	0.0139826599364788	4b
not5∆_minNONOPT - WT_minNONOPT	0.0	4b
not5∆_minNONOPT - WT_minOPT	0.593767985271458	4b
not5∆_minNONOPT - WT_CGA	1.35780275911657e-13	4b
not5∆_minOPT - not5∆_CGA	8.81875350522421e-10	4b
not5∆_minOPT - syh1∆_minNONOPT	0.0	4b
not5∆_minOPT - syh1∆_minOPT	0.993073117832654	4b
not5∆_minOPT - syh1∆_CGA	1.22739707286712e-08	4b
not5∆_minOPT - WT_minNONOPT	0.0	4b
not5∆_minOPT - WT_minOPT	0.685044106775807	4b
not5∆_minOPT - WT_CGA	0.0	4b
not5∆_CGA - syh1∆_minNONOPT	0.0	4b
not5∆_CGA - syh1∆_minOPT	4.41692651342862e-08	4b
not5∆_CGA - syh1∆_CGA	0.999934721841731	4b
not5∆_CGA - WT_minNONOPT	0.0	4b
not5∆_CGA - WT_minOPT	6.20997139155754e-07	4b
not5∆_CGA - WT_CGA	3.89657249577624e-07	4b
syh1∆_minNONOPT - syh1∆_minOPT	0.0	4b
syh1∆_minNONOPT - syh1∆_CGA	0.0	4b
syh1∆_minNONOPT - WT_minNONOPT	0.999842742863876	4b
syh1∆_minNONOPT - WT_minOPT	0.0	4b
syh1∆_minNONOPT - WT_CGA	0.0	4b
syh1∆_minOPT - syh1∆_CGA	7.12220355358895e-07	4b
syh1∆_minOPT - WT_minNONOPT	0.0	4b
syh1∆_minOPT - WT_minOPT	0.999966879348455	4b
syh1∆_minOPT - WT_CGA	0.0	4b
syh1∆_CGA - WT_minNONOPT	0.0	4b
syh1∆_CGA - WT_minOPT	1.07142136962501e-05	4b
syh1∆_CGA - WT_CGA	2.46315307039779e-08	4b
WT_minNONOPT - WT_minOPT	0.0	4b
WT_minNONOPT - WT_CGA	0.0	4b
WT_minOPT - WT_CGA	0.0	4b
