# Supplementary material for: Distinct elongation stalls during translation are linked with distinct pathways for mRNA degradation
Source: eLife. 2022 Jul 27;11:e76038. doi: 10.7554/eLife.76038 (PMC9352352; doi:10.7554/eLife.76038)
Supplement: Supplementary file 7. [file elife-76038-supp7.csv]

strain	reporter	avg half-life (minutes)	stdev
WT	minNONOPT	1.45	0.24
WT	minOPT	20.05	1.19
WT	minCGA	5.8	0.44
syh1Δ	minNONOPT	1.56	0.19
syh1Δ	minOPT	21.58	1.8
syh1Δ	minCGA	11.71	0.79
hel2Δ	minNONOPT	1.72	0.14
hel2Δ	minOPT	21.46	0.96
hel2Δ	minCGA	6.37	0.11
hel2Δsyh1Δ	minNONOPT	2	0.04
hel2Δsyh1Δ	minOPT	21.77	0.75
hel2Δsyh1Δ	minCGA	34.52	3.31
not5Δ	minNONOPT	16.49	1.18
not5Δ	minOPT	24.16	2.29
not5Δ	minCGA	10.89	1.29
