# Supplementary material for: Distinct elongation stalls during translation are linked with distinct pathways for mRNA degradation
Source: eLife. 2022 Jul 27;11:e76038. doi: 10.7554/eLife.76038 (PMC9352352; doi:10.7554/eLife.76038)
Supplement: Supplementary file 9. [file elife-76038-supp9.csv]

Plasmid name	Description	Source
pAV_minCGA	minCGA reporter, 100% optimal HIS3 with N-terminal FLAG tag (GAL1 promoter) and CGA12 insert, AMP, URA3 selection marker	This study
pAV_minOPT (pJC857)	minOPT reporter, 100% optimal HIS3 with N-terminal FLAG tag (GAL1 promoter), AMP, URA3 selection marker	Radhakrishnan, et al. 2016
pAV_minNONOPT (pJC867)	minNONOPT reporter, 0% optimal HIS3 with N-terminal FLAG tag (GAL1 promoter), AMP, URA3 selection marker	Radhakrishnan, et al. 2016
pKD064	Bidirectional gal promoter with RFP control and GFP-2A-FLAG-HIS3(partially nonoptimal); AMP, Met17, LEU2	D'Orazio, et al. 2019
pKD065	Bidirectional gal promoter with RFP control and GFP-2A-FLAG-HIS3(optimal); AMP, Met17, LEU2	D'Orazio, et al. 2019
pKD079	Bidirectional gal promoter with RFP control and GFP-2A-FLAG-HIS3(with insert); insert = AAAx12; AMP, Met17, LEU2	D'Orazio, et al. 2019
pKD080	Bidirectional gal promoter with RFP control and GFP-2A-FLAG-HIS3(with insert); insert = CGAx12; AMP, Met17, LEU2	D'Orazio, et al. 2019
