# Supplementary material for: Distinct elongation stalls during translation are linked with distinct pathways for mRNA degradation
Source: eLife. 2022 Jul 27;11:e76038. doi: 10.7554/eLife.76038 (PMC9352352; doi:10.7554/eLife.76038)
Supplement: Supplementary file 10. [file elife-76038-supp10.csv]

Knockout	Reporter	Yeast strain name	Genotype	source
wt	GFP-OPT	yKD131	MATa his3Δ1 leu2Δ0 met15Δ0 ura3Δ0 ade2::RFP_Pgal_GFP-2A-FLHIS3_MET17	D'Orazio et al. 2019
xrn1	GFP-OPT	yKD200	MATa his3Δ1 leu2Δ0 met15Δ0 ura3Δ0 xrn1::hphMX6 ade2::RFP_Pgal_GFP-2A-FLHIS3_MET17	D'Orazio et al. 2019
ski2	GFP-OPT	yKD141	MATa his3Δ1 leu2Δ0 met15Δ0 ura3Δ0 ski2::hphMX6 ade2::RFP_Pgal_GFP-2A-FLHIS3_MET17	D'Orazio et al. 2019
slh1	GFP-OPT	yKD214	MATa his3Δ1 leu2Δ0 met15Δ0 ura3Δ0 slh1::NatMX4 ade2::RFP_Pgal_GFP-2A-FLHIS3_MET17	This study
hel2	GFP-OPT	yKD151	MATa his3Δ1 leu2Δ0 met15Δ0 ura3Δ0 hel2::kanMX4 ade2::RFP_Pgal_GFP-2A-FLHIS3_MET17	This study
syh1	GFP-OPT	yKD450	MATa his3Δ1 leu2Δ0 met15Δ0 ura3Δ0 syh1::kanMX4 ade2::RFP_Pgal_GFP-2A-FLHIS3_MET17	This study
xrn1	GFP-CGA	yKD201	MATa his3Δ1 leu2Δ0 met15Δ0 ura3Δ0 xrn1::hphMX6 ade2::RFP_Pgal_GFP-2A-FLHIS3-CGA12-HIS3_MET17	D'Orazio et al. 2019
wt	GFP-CGA	yKD133	MATa his3Δ1 leu2Δ0 met15Δ0 ura3Δ0 ade2::RFP_Pgal_GFP-2A-FLHIS3-CGA12-HIS3_MET17	D'Orazio et al. 2019
hel2	GFP-CGA	yKD153	MATa his3Δ1 leu2Δ0 met15Δ0 ura3Δ0 hel2::kanMX4 ade2::RFP_Pgal_GFP-2A-FLHIS3-CGA12-HIS3_MET17	This study
slh1	GFP-CGA	yKD215	MATa his3Δ1 leu2Δ0 met15Δ0 ura3Δ0 slh1::NatMX4 ade2::RFP_Pgal_GFP-2A-FLHIS3-CGA12-HIS3_MET17	D'Orazio et al. 2019
ski2	GFP-CGA	yKD143	MATa his3Δ1 leu2Δ0 met15Δ0 ura3Δ0 ski2::hphMX6 ade2::RFP_Pgal_GFP-2A-FLHIS3-CGA12-HIS3_MET17	D'Orazio et al. 2019
syh1	GFP-CGA	yKD452	MATa his3Δ1 leu2Δ0 met15Δ0 ura3Δ0 syh1::kanMX4 ade2::RFP_Pgal_GFP-2A-FLHIS3-CGA12-HIS3_MET17	This study
syh1	GFP-CGA	yAV152	MATa his3Δ1 leu2Δ0 met15Δ0 ura3Δ0 syh1::hphMX6 ade2::RFP_Pgal_GFP-2A-FLHIS3-CGA12-HIS3_MET17	This study
wt	GFP-NONOPT	yKD130	MATa his3Δ1 leu2Δ0 met15Δ0 ura3Δ0 ade2::RFP_Pgal_GFP-2A-FLHIS3-NONOPT-HIS3_MET17	This study
hel2	GFP-NONOPT	yKD150	MATa his3Δ1 leu2Δ0 met15Δ0 ura3Δ0 hel2::kanMX4 ade2::RFP_Pgal_GFP-2A-FLHIS3-NONOPT-HIS3_MET17	This study
syh1	GFP-NONOPT	yKD451	MATa his3Δ1 leu2Δ0 met15Δ0 ura3Δ0 syh1::hphMX6 ade2::RFP_Pgal_GFP-2A-FLHIS3-NONOPT-HIS3_MET17	This study
hel2syh1	GFP-NONOPT	yKD454	MATa his3Δ1 leu2Δ0 met15Δ0 ura3Δ0 hel2::kanMX4 syh1::hphMX6 ade2::RFP_Pgal_GFP-2A-FLHIS3-NONOPT-HIS3_MET17	This study
wt	minNONOPT	yAV115	MATa his3Δ1 leu2Δ0 met15Δ0 ura3Δ0 [gal_FLGHIS3_NONOPT, URA3]	This study
hel2	minNONOPT	yAV126	MATa his3Δ1 leu2Δ0 met15Δ0 ura3Δ0 hel2::kanMX4 [gal_FLGHIS3_NONOPT, URA3]	This study
syh1	minNONOPT	yAV129	MATa his3Δ1 leu2Δ0 met15Δ0 ura3Δ0 syh1::hphMX6 [gal_FLGHIS3_NONOPT, URA3]	This study
hel2syh1	minNONOPT	yAV132	MATa his3Δ1 leu2Δ0 met15Δ0 ura3Δ0 syh1::hphMX6 hel2::kanMX4 [gal_FLGHIS3_NONOPT, URA3]	This study
not5	minNONOPT	yAV150	MATa his3Δ1 leu2Δ0 met15Δ0 ura3Δ0 not5::LEU2 [gal_FLGHIS3_NONOPT, URA3]	This study
not5	minCGA	yAV135	MATa his3Δ1 leu2Δ0 met15Δ0 ura3Δ0 not5::LEU2 [gal_FLGHIS3_CGA12_HIS3, URA3]	This study
not5	minOPT	yAV151	MATa his3Δ1 leu2Δ0 met15Δ0 ura3Δ0 not5::LEU2 [gal_FLGHIS3_OPT, URA3]	This study
wt	minOPT	yAV116	MATa his3Δ1 leu2Δ0 met15Δ0 ura3Δ0 syh1::hphMX6 [gal_FLGHIS3_OPT, URA3]	This study
hel2	minOPT	yAV127	MATa his3Δ1 leu2Δ0 met15Δ0 ura3Δ0 hel2::kanMX4 [gal_FLGHIS3_OPT, URA3]	This study
slh1	minOPT	yAV156	MATa his3Δ1 leu2Δ0 met15Δ0 ura3Δ0 slh1::natMX4 [gal_FLGHIS3_OPT, URA3]	This study
syh1	minOPT	yAV130	MATa his3Δ1 leu2Δ0 met15Δ0 ura3Δ0 syh1::hphMX6 [gal_FLGHIS3_OPT, URA3]	This study
hel2syh1	minOPT	yAV133	MATa his3Δ1 leu2Δ0 met15Δ0 ura3Δ0 syh1::hghMX6 hel2kanMX4 [gal_FLGHIS3_OPT, URA3]	This study
syh1	minCGA	yAV131	MATa his3Δ1 leu2Δ0 met15Δ0 ura3Δ0 syh1::hphMX6 [gal_FLGHIS3_CGA12_HIS3, URA3]	This study
cue2	minOPT	yAV157	MATa his3Δ1 leu2Δ0 met15Δ0 ura3Δ0 cue2::natMX4 [gal_FLGHIS3_OPT, URA3]	This study
slh1 syh1	minOPT	yAV158	MATa his3Δ1 leu2Δ0 met15Δ0 ura3Δ0 slh1::natMX4 syh1::hphMX6 [gal_FLGHIS3_OPT, URA3]	This study
cue2syh1	minOPT	yAV159	MATa his3Δ1 leu2Δ0 met15Δ0 ura3Δ0 cue2::natMX4 syh1::hphMX6 [gal_FLGHIS3_OPT, URA3]	This study
cue2slh1syh1	minOPT	yAV160	MATa his3Δ1 leu2Δ0 met15Δ0 ura3Δ0 cue2::kanMX4 syh1::hphMX6 slh1::natMX4 [gal_FLGHIS3_OPT, URA3]	This study
wt	minCGA	yAV124	MATa his3Δ1 leu2Δ0 met15Δ0 ura3Δ0 [gal_FLGHIS3_CGA12_HIS3, URA3]	This study
hel2	minCGA	yAV128	MATa his3Δ1 leu2Δ0 met15Δ0 ura3Δ0 hel2::kanMX4 [gal_FLGHIS3_CGA12_HIS3, URA3]	This study
cue2	minCGA	yAV162	MATa his3Δ1 leu2Δ0 met15Δ0 ura3Δ0 cue2::natMX4 [gal_FLGHIS3_CGA12_HIS3, URA3]	This study
slh1	minCGA	yAV161	MATa his3Δ1 leu2Δ0 met15Δ0 ura3Δ0 slh1::natMX4 [gal_FLGHIS3_CGA12_HIS3, URA3]	This study
slh1 syh1	minCGA	yAV163	MATa his3Δ1 leu2Δ0 met15Δ0 ura3Δ0 slh1::natMX4 syh1::hphMX6 [gal_FLGHIS3_CGA12_HIS3, URA3]	This study
hel2syh1	minCGA	yAV134	MATa his3Δ1 leu2Δ0 met15Δ0 ura3Δ0 syh1::hphMX6 hel2::kanMX4 [gal_FLGHIS3_CGA12_HIS3, URA3]	This study
cue2syh1	minCGA	yAV164	MATa his3Δ1 leu2Δ0 met15Δ0 ura3Δ0 cue2::natMX4 syh1::hphMX6 [gal_FLGHIS3_CGA12_HIS3, URA3]	This study
cue2slh1syh1	minCGA	yAV165	MATa his3Δ1 leu2Δ0 met15Δ0 ura3Δ0 cue2::kanMX4 syh1::hphMX6 slh1::natMX4 [gal_FLGHIS3_CGA12_HIS3, URA3]	This study
ltn1	GFP-CGA	yKD158	MATa his3Δ1 leu2Δ0 met15Δ0 ura3Δ0 ltn1::kanMX4 ade2::RFP_Pgal_GFP-2A-FLHIS3-CGA12-HIS3_MET17	This study
Smy2-TAP		yAV091	MATa his3Δ1 leu2Δ0 met15Δ0 ura3Δ0 SMY2-TAP	Dharmacon
Syh1-TAP		yAV090	MATa his3Δ1 leu2Δ0 met15Δ0 ura3Δ0 SYH1-TAP	Dharmacon
hel2syh1	GFP-CGA	yKD455	MATa his3Δ1 leu2Δ0 met15Δ0 ura3Δ0 hel2::kanMX4 syh1::hphMX6 ade2::RFP_Pgal_GFP-2A-FLHIS3-CGA12-HIS3_MET17	This study
mbf1	GFP-OPT	yAV059	MATa his3Δ1 leu2Δ0 met15Δ0 ura3Δ0 mbf1::natMX4 ade2::RFP_Pgal_GFP-2A-FLHIS3_MET17	This study
mbf1	GFP-CGA	yAV061	MATa his3Δ1 leu2Δ0 met15Δ0 ura3Δ0 mbf1::natMX4 ade2::RFP_Pgal_GFP-2A-FLHIS3-CGA12-HIS3_MET17	This study
eap1	GFP-OPT	yAV077	MATa his3Δ1 leu2Δ0 met15Δ0 ura3Δ0 eap1::hphMX6 ade2::RFP_Pgal_GFP-2A-FLHIS3_MET17	This study
eap1hel2	GFP-OPT	yAV080	MATa his3Δ1 leu2Δ0 met15Δ0 ura3Δ0 eap1::hphMX6 hel2::kanMX4 ade2::RFP_Pgal_GFP-2A-FLHIS3_MET17	This study
eap1	GFP-CGA	yAV079	MATa his3Δ1 leu2Δ0 met15Δ0 ura3Δ0 eap1::hphMX6 ade2::RFP_Pgal_GFP-2A-FLHIS3-CGA12-HIS3_MET17	This study
eap1hel2	GFP-CGA	yAV082	MATa his3Δ1 leu2Δ0 met15Δ0 ura3Δ0 eap1::hphMX6 hel2::kanMX4 ade2::RFP_Pgal_GFP-2A-FLHIS3-CGA12-HIS3_MET17	This study
mbf1	minOPT	yAV166	MATa his3Δ1 leu2Δ0 met15Δ0 ura3Δ0 mbf1::natMX4 [gal_FLGHIS3_OPT, URA3]	This study
mbf1	minCGA	yAV167	MATa his3Δ1 leu2Δ0 met15Δ0 ura3Δ0 mbf1::natMX4 [gal_FLGHIS3_CGA12, URA3]	This study
mbf1hel2	minOPT	yAV168	MATa his3Δ1 leu2Δ0 met15Δ0 ura3Δ0 mbf1::natMX4 hel2::kanMX4 [gal_FLGHIS3_OPT, URA3]	This study
mbf1hel2	minCGA	yAV169	MATa his3Δ1 leu2Δ0 met15Δ0 ura3Δ0 mbf1::natMX4 hel2::kanMX4 [gal_FLGHIS3_CGA12, URA3]	This study
syh1mbf1	minOPT	yAV170	MATa his3Δ1 leu2Δ0 met15Δ0 ura3Δ0 syh1::hphMX6 mbf1::natMX4 [gal_FLGHIS3_OPT, URA3]	This study
syh1mbf1	minCGA	yAV171	MATa his3Δ1 leu2Δ0 met15Δ0 ura3Δ0 syh1::hphMX6 mbf1::natMX4 [gal_FLGHIS3_CGA12, URA3]	This study
smy2	minOPT	yAV172	MATa his3Δ1 leu2Δ0 met15Δ0 ura3Δ0 smy2::natMX4 [gal_FLGHIS3_OPT, URA3]	This study
smy2	minCGA	yAV173	MATa his3Δ1 leu2Δ0 met15Δ0 ura3Δ0 smy2::natMX4 [gal_FLGHIS3_CGA12, URA3]	This study
smy2hel2	minOPT	yAV174	MATa his3Δ1 leu2Δ0 met15Δ0 ura3Δ0 smy2::natMX4 hel2::kanMX4 [gal_FLGHIS3_OPT, URA3]	This study
smy2hel2	minCGA	yAV175	MATa his3Δ1 leu2Δ0 met15Δ0 ura3Δ0 smy2::natMX4 hel2::kanMX4 [gal_FLGHIS3_CGA12, URA3]	This study
syh1smy2	minOPT	yAV176	MATa his3Δ1 leu2Δ0 met15Δ0 ura3Δ0 syh1::hphMX6 smy2::natMX4 [gal_FLGHIS3_OPT, URA3]	This study
syh1smy2	minCGA	yAV177	MATa his3Δ1 leu2Δ0 met15Δ0 ura3Δ0 syh1::hphMX6 smy2::natMX4 [gal_FLGHIS3_CGA12, URA3]	This study
syh1smy2hel2	minOPT	yAV178	MATa his3Δ1 leu2Δ0 met15Δ0 ura3Δ0 syh1::hphMX6 smy2::natMX4 hel2::kanMX4 [gal_FLGHIS3_OPT, URA3]	This study
syh1smy2hel2	minCGA	yAV179	MATa his3Δ1 leu2Δ0 met15Δ0 ura3Δ0 syh1::hphMX6 smy2::natMX4 hel2::kanMX4 [gal_FLGHIS3_CGA12, URA3]	This study
